# Supplementary material for: Changes in the composition of marine and sea-ice diatoms derived from sedimentary ancient DNA of the eastern Fram Strait over the past 30 000 years
Source: Copernicus journal article supplement (doi:10.5194/os-16-1017-2020), 2020-09-07
Supplement: Supplementary file 1 [file SupplementaryTableS1.xlsx]

## Sheet: Tabelle1
scientific_name	best_identity	best_match:diat_embl138_final	genus_name	family_name	order_name	Class	rank_by_db:diat_embl138_final	species_list:diat_embl138_final	species_name	taxid_by_db:diat_embl138_final	sequence	counts	8.85_sampleA_rep1	8.85_sampleA_rep2	8.85_sampleA_rep3	8.85_sampleB_rep4	8.85_sampleA_rep5	8.85_sampleA_rep6	8.56_rep1	8.56_rep2	8.56_rep3	7.85_rep1	7.85_rep2	7.85_rep3	7.27_rep1	7.27_rep2	7.27_rep3	6.68_rep1	6.68_rep2	6.68_rep3	5.80_rep1	5.80_rep2	5.80_rep3	3.71_rep1	3.71_rep2	3.71_rep3	3.10_rep1	3.10_rep2	3.10_rep3	0.90_rep1	0.90_rep2	0.90_rep3	0.90_rep4	0.30_rep1	0.30_rep2	0.30_rep3	0.12_rep1	0.12_rep2	0.12_rep3
Achnanthidium	0.973684	KJ658379	Achnanthidium	Achnanthidiaceae	Cocconeidales	Bacillariophyceae	genus	['Achnanthidium reimeri']	NA	265567	aaacatcactgctggtacaatggaagaagtgtacaaacgtgctgagtatgctaaagctgttggttcaatcgttgtt	331	0	0	0	0	0	0	0	0	0	0	0	0	0	0	0	0	19	0	0	0	0	0	0	0	312	0	0	0	0	0	0	0	0	0	0	0	0
Achnanthidium	0.973684	KU687479	Achnanthidium	Achnanthidiaceae	Cocconeidales	Bacillariophyceae	genus	['Achnanthidium sp.']	NA	265567	aaacatcactgctggtacaatggaagaagtttacaaacgtgctgagtatgctaaagctgttggttctatcgttgtt	19	0	0	0	0	0	0	0	0	0	0	0	0	0	19	0	0	0	0	0	0	0	0	0	0	0	0	0	0	0	0	0	0	0	0	0	0	0
Actinocyclus sp. 1 MPA-2013	0.960526	KC309595	Actinocyclus	Hemidiscaceae	Coscinodiscales	Coscinodiscophyceae	species	['Actinocyclus sp. 1 MPA-2013']	Actinocyclus sp. 1 MPA-2013	1335100	aaacattactgcagctacaatggaagagatttacacgcgtgctgactatgctaaaacagttggttcgatagttgta	26161	756	446	860	1283	176	298	1028	975	2963	263	3326	313	572	4816	5774	95	348	1182	0	0	687	0	0	0	0	0	0	0	0	0	0	0	0	0	0	0	0
Actinocyclus sp. 1 MPA-2013	1	KC309595	Actinocyclus	Hemidiscaceae	Coscinodiscales	Coscinodiscophyceae	species	['Actinocyclus sp. 1 MPA-2013']	Actinocyclus sp. 1 MPA-2013	1335100	aaatattactgcagctacaatggaagatatttacgcgcgtgctgactatgctaaaacagttggttcgatagttgta	13036	166	289	107	910	0	80	66	779	2340	0	0	0	1044	0	509	31	464	1665	0	464	77	0	669	1075	0	0	0	0	0	0	0	0	0	2301	0	0	0
Actinocyclus sp. 1 MPA-2013	0.973684	KC309595	Actinocyclus	Hemidiscaceae	Coscinodiscales	Coscinodiscophyceae	species	['Actinocyclus sp. 1 MPA-2013']	Actinocyclus sp. 1 MPA-2013	1335100	aaatgttactgcagctacaatggaagagatttacgcgcgtgctgactatgctaaaacagttggttcgatagttgta	2029	0	0	0	0	0	0	0	0	0	0	0	0	0	0	0	0	0	0	0	0	0	0	0	0	0	0	0	0	120	0	0	1909	0	0	0	0	0
Actinocyclus sp. 1 MPA-2013	0.973684	KC309595	Actinocyclus	Hemidiscaceae	Coscinodiscales	Coscinodiscophyceae	species	['Actinocyclus sp. 1 MPA-2013']	Actinocyclus sp. 1 MPA-2013	1335100	aaacattactgcagctacaatggaagagatttacgcgcgtgctgactatgctaaaacagttggttcgatagttgta	869	0	0	0	0	0	0	292	0	567	0	0	0	0	10	0	0	0	0	0	0	0	0	0	0	0	0	0	0	0	0	0	0	0	0	0	0	0
Actinocyclus sp. 1 MPA-2013	0.986842	KC309595	Actinocyclus	Hemidiscaceae	Coscinodiscales	Coscinodiscophyceae	species	['Actinocyclus sp. 1 MPA-2013']	Actinocyclus sp. 1 MPA-2013	1335100	aaatattactgcagctacaatggaagatatttacgcgcgtgctgactatgctaagacagttggttcgatagttgta	364	0	0	0	0	0	0	0	0	0	0	0	0	0	0	0	0	0	0	0	0	0	0	0	0	0	0	0	0	0	0	0	0	0	364	0	0	0
Actinocyclus sp. 1 MPA-2013	0.947368	KC309595	Actinocyclus	Hemidiscaceae	Coscinodiscales	Coscinodiscophyceae	species	['Actinocyclus sp. 1 MPA-2013']	Actinocyclus sp. 1 MPA-2013	1335100	aaacattactgcagctacaatggaagagatttacacgcatgctgactatgctaaaacagttggttcgatagttgta	325	0	0	0	0	0	0	0	0	0	0	0	0	0	0	0	0	325	0	0	0	0	0	0	0	0	0	0	0	0	0	0	0	0	0	0	0	0
Actinocyclus sp. 1 MPA-2013	0.947368	KC309595	Actinocyclus	Hemidiscaceae	Coscinodiscales	Coscinodiscophyceae	species	['Actinocyclus sp. 1 MPA-2013']	Actinocyclus sp. 1 MPA-2013	1335100	aaacattactgcaactacaatggaagagatttacacgcgtgctgactatgctaaaacagttggttcgatagttgta	292	0	0	0	0	0	0	0	0	0	0	0	0	0	0	292	0	0	0	0	0	0	0	0	0	0	0	0	0	0	0	0	0	0	0	0	0	0
Actinocyclus sp. 1 MPA-2013	0.960526	KC309595	Actinocyclus	Hemidiscaceae	Coscinodiscales	Coscinodiscophyceae	species	['Actinocyclus sp. 1 MPA-2013']	Actinocyclus sp. 1 MPA-2013	1335100	aaatgttactgcagctacaatggaagagatttacgcgcgtgctggctatgctaaaacagttggttcgatagttgta	140	0	0	0	0	0	0	0	0	0	0	0	0	0	0	0	0	0	0	0	0	0	0	0	0	0	0	0	0	0	0	0	140	0	0	0	0	0
Actinocyclus sp. 1 MPA-2013	0.960526	KC309595	Actinocyclus	Hemidiscaceae	Coscinodiscales	Coscinodiscophyceae	species	['Actinocyclus sp. 1 MPA-2013']	Actinocyclus sp. 1 MPA-2013	1335100	aaatgttactgcagctacaatggaagagatttacgcgcgtgctgactatgctaaaacagttggttcgatagttgca	119	0	0	0	0	0	0	0	0	0	0	0	0	0	0	0	0	0	0	0	0	0	0	0	0	0	0	0	0	0	0	0	119	0	0	0	0	0
Actinocyclus sp. 1 MPA-2013	0.986842	KC309595	Actinocyclus	Hemidiscaceae	Coscinodiscales	Coscinodiscophyceae	species	['Actinocyclus sp. 1 MPA-2013']	Actinocyclus sp. 1 MPA-2013	1335100	aaatattactgcagctacaatggaaaatatttacgcgcgtgctgactatgctaaaacagttggttcgatagttgta	111	0	111	0	0	0	0	0	0	0	0	0	0	0	0	0	0	0	0	0	0	0	0	0	0	0	0	0	0	0	0	0	0	0	0	0	0	0
Actinocyclus sp. 1 MPA-2013	0.947368	KC309595	Actinocyclus	Hemidiscaceae	Coscinodiscales	Coscinodiscophyceae	species	['Actinocyclus sp. 1 MPA-2013']	Actinocyclus sp. 1 MPA-2013	1335100	aaacattactgcagctacaatggaagagatttacacacgtgctgactatgctaaaacagttggttcgatagttgta	100	0	0	100	0	0	0	0	0	0	0	0	0	0	0	0	0	0	0	0	0	0	0	0	0	0	0	0	0	0	0	0	0	0	0	0	0	0
Actinocyclus sp. 1 MPA-2013	0.973684	KC309595	Actinocyclus	Hemidiscaceae	Coscinodiscales	Coscinodiscophyceae	species	['Actinocyclus sp. 1 MPA-2013']	Actinocyclus sp. 1 MPA-2013	1335100	aaatattactacagctacaatggaagatatttacgcgcgtgctaactatgctaaaacagttggttcgatagttgta	91	0	0	0	0	0	0	0	0	0	0	0	0	0	0	0	0	0	91	0	0	0	0	0	0	0	0	0	0	0	0	0	0	0	0	0	0	0
Actinocyclus sp. 1 MPA-2013	0.947368	KC309595	Actinocyclus	Hemidiscaceae	Coscinodiscales	Coscinodiscophyceae	species	['Actinocyclus sp. 1 MPA-2013']	Actinocyclus sp. 1 MPA-2013	1335100	aaacattactgcagttacaatggaagagatttacacgcgtgctgactatgctaaaacagttggttcgatagttgta	81	0	0	0	0	0	0	0	81	0	0	0	0	0	0	0	0	0	0	0	0	0	0	0	0	0	0	0	0	0	0	0	0	0	0	0	0	0
Actinocyclus sp. 1 MPA-2013	0.986842	KC309595	Actinocyclus	Hemidiscaceae	Coscinodiscales	Coscinodiscophyceae	species	['Actinocyclus sp. 1 MPA-2013']	Actinocyclus sp. 1 MPA-2013	1335100	aaatattactgcagctacaatggaagagatttacgcgcgtgctgactatgctaaaacagttggttcgatagttgta	41	0	0	0	0	0	0	0	0	0	0	0	0	0	0	0	0	0	0	0	0	0	0	0	0	0	0	0	41	0	0	0	0	0	0	0	0	0
Actinocyclus sp. 1 MPA-2013	0.986842	KC309595	Actinocyclus	Hemidiscaceae	Coscinodiscales	Coscinodiscophyceae	species	['Actinocyclus sp. 1 MPA-2013']	Actinocyclus sp. 1 MPA-2013	1335100	aaatattactgcagctacaatggaagatatttacgcgcgtgctgactatgctaaagcagttggttcgatagttgta	40	0	0	0	0	0	0	0	0	0	0	0	0	0	0	0	0	0	0	0	0	0	0	40	0	0	0	0	0	0	0	0	0	0	0	0	0	0
Actinocyclus sp. 1 MPA-2013	0.934211	KC309595	Actinocyclus	Hemidiscaceae	Coscinodiscales	Coscinodiscophyceae	species	['Actinocyclus sp. 1 MPA-2013']	Actinocyclus sp. 1 MPA-2013	1335100	aaacattactacaactacaatggaagagatttacacgcgtgctgactatgctaaaacagttggttcgatagttgta	19	0	0	0	19	0	0	0	0	0	0	0	0	0	0	0	0	0	0	0	0	0	0	0	0	0	0	0	0	0	0	0	0	0	0	0	0	0
Alaria esculenta	1	AF064745	Alaria	Alariaceae	Laminariales	Phaeophyceae	species	['Alaria esculenta']	Alaria esculenta	2889	aaacgttactgctgcaacaatggaacaaatatatgaacgtgcagagtacgctcattcaattggtactgttattgta	7175	0	0	0	0	0	0	0	0	0	0	313	0	0	0	0	0	0	0	0	6376	0	0	0	0	0	0	0	0	0	0	0	0	0	0	0	0	486
Alaria esculenta	1	EU681587	Alaria	Alariaceae	Laminariales	Phaeophyceae	species	['Alaria esculenta']	Alaria esculenta	2889	aaacattactgctgcaacaatggaacaaatatatgaacgtgcagagtacgctcattcaattggtactgttattgta	62	0	0	0	0	0	0	0	0	0	0	0	0	0	0	0	0	0	0	0	35	0	0	0	0	0	0	0	0	0	0	0	27	0	0	0	0	0
Anomoeoneidaceae	0.934211	FJ002105	NA	Anomoeoneidaceae	Cymbellales	Bacillariophyceae	family	['Pauliella taeniata', 'Anomoeoneis sculpta']	NA	216732	aaacgtaactgctggtacaatggaagaagtatacaaacgttctgagtatgctaaatcagttggttctgtagttatt	16749	0	0	0	0	0	34	164	93	0	0	412	0	0	0	0	0	0	553	0	0	0	0	0	0	0	0	0	0	0	0	15493	0	0	0	0	0	0
Arcocellulus mammifer	0.986842	FJ002152	Arcocellulus	Cymatosiraceae	Cymatosirales	Mediophyceae	species	['Arcocellulus mammifer']	Arcocellulus mammifer	420264	gaacattacagcagctacgatggaagaaatttacaaacgtgctgactacgctaagaagatcggttctgtaatcgta	62	0	0	0	62	0	0	0	0	0	0	0	0	0	0	0	0	0	0	0	0	0	0	0	0	0	0	0	0	0	0	0	0	0	0	0	0	0
Arcocellulus mammifer	0.973684	FJ002152	Arcocellulus	Cymatosiraceae	Cymatosirales	Mediophyceae	species	['Arcocellulus mammifer']	Arcocellulus mammifer	420264	aaacattacagcagctacgatggaagaaatttacaaacgtgctgactacgctaagaagatcggttctgtagttgta	26	0	0	0	0	0	0	0	0	0	0	0	0	0	0	0	0	0	0	0	0	0	0	0	26	0	0	0	0	0	0	0	0	0	0	0	0	0
Arcocellulus mammifer	0.973684	FJ002152	Arcocellulus	Cymatosiraceae	Cymatosirales	Mediophyceae	species	['Arcocellulus mammifer']	Arcocellulus mammifer	420264	gaacattacagcagctacgatggaggaaatttacaaacgtgctgactacgctaagaagatcggttctgtaatcgta	15	0	0	0	15	0	0	0	0	0	0	0	0	0	0	0	0	0	0	0	0	0	0	0	0	0	0	0	0	0	0	0	0	0	0	0	0	0
Attheya	1	FJ002122	Attheya	Attheyaceae	Chaetocerotales	Mediophyceae	genus	[]	NA	265578	aaacgttactgctgcgactatggaaaatgtttacaaacgtgctgaatttgctaagcaagttggttctgtaatcatc	121331	241	0	0	284	13	77	0	0	2435	315	63	1461	812	0	0	50	0	0	0	1208	0	5978	2231	2296	0	245	0	0	0	0	0	0	20100	0	83522	0	0
Attheya	0.986842	FJ002122	Attheya	Attheyaceae	Chaetocerotales	Mediophyceae	genus	[]	NA	265578	aaacgttactgctgcgactatggaagatgtttacaaacgtgctgaatttgctaagcaagttggttctgtaatcatc	12041	0	0	0	96	0	0	0	0	0	0	0	0	0	0	0	0	0	0	0	0	0	0	0	0	0	0	0	10389	0	0	1469	0	23	0	64	0	0
Attheya	0.986842	JN162767	Attheya	Attheyaceae	Chaetocerotales	Mediophyceae	genus	[]	NA	265578	aaacgtaactgctgcaacgatggaaaacgtttacaaacgtgctgaattcgctaaagaagttggttctgtaattatc	2568	0	0	0	0	0	0	0	0	0	0	0	0	0	0	0	0	0	0	0	0	0	0	0	0	0	0	0	0	0	0	2568	0	0	0	0	0	0
Attheya	1	JN162767	Attheya	Attheyaceae	Chaetocerotales	Mediophyceae	genus	[]	NA	265578	aaacgtaactgctgcaacgatggaagacgtttacaaacgtgctgaattcgctaaagaagttggttctgtaattatc	2154	18	0	0	14	0	0	65	0	477	0	0	607	0	0	0	75	77	0	0	0	0	0	788	0	33	0	0	0	0	0	0	0	0	0	0	0	0
Attheya	0.986842	FJ002122	Attheya	Attheyaceae	Chaetocerotales	Mediophyceae	genus	[]	NA	265578	aaacgttactgctgcgactatggaaaatgtttacaaacgtgctgaatttgctaagcgagttggttctgtaatcatc	371	0	0	0	0	0	0	0	0	0	0	0	0	0	0	0	0	0	0	0	0	0	0	334	0	0	0	0	0	0	0	0	0	0	0	37	0	0
Attheya	0.986842	FJ002122	Attheya	Attheyaceae	Chaetocerotales	Mediophyceae	genus	[]	NA	265578	aaacgttactgctgcgactatggaaaatgtttacaaacgtgctgaatttgctaagtaagttggttctgtaatcatc	111	0	0	78	0	0	0	0	0	0	0	0	0	0	0	0	0	0	0	0	0	0	0	0	0	0	0	0	0	0	0	0	0	11	0	22	0	0
Attheya	0.986842	FJ002122	Attheya	Attheyaceae	Chaetocerotales	Mediophyceae	genus	[]	NA	265578	aaacgttactgctgcgactatggaaaatgtttacaaacgtgctgaatttgctaagcaagttggttctgtaattatc	84	0	0	0	0	0	0	0	0	0	0	0	0	0	0	0	0	0	0	0	0	0	11	0	0	0	0	0	0	0	0	0	0	0	0	73	0	0
Attheya	0.986842	FJ002122	Attheya	Attheyaceae	Chaetocerotales	Mediophyceae	genus	[]	NA	265578	aaacattactgctgcgactatggaaaatgtttacaaacgtgctgaatttgctaagcaagttggttctgtaatcatc	74	0	0	0	0	0	0	0	0	0	0	0	0	0	0	0	0	0	0	0	0	0	0	0	0	0	0	0	0	0	0	0	0	11	0	63	0	0
Attheya	0.986842	FJ002122	Attheya	Attheyaceae	Chaetocerotales	Mediophyceae	genus	[]	NA	265578	aaacgttactgctgcgactatggaaaatgtttacaaacgtgctgaatttgctgagcaagttggttctgtaatcatc	63	0	0	0	0	0	0	0	0	0	0	0	0	0	0	0	0	0	0	0	0	0	10	0	0	0	0	0	0	0	0	0	0	11	0	42	0	0
Attheya	0.986842	FJ002122	Attheya	Attheyaceae	Chaetocerotales	Mediophyceae	genus	[]	NA	265578	aagcgttactgctgcgactatggaaaatgtttacaaacgtgctgaatttgctaagcaagttggttctgtaatcatc	60	0	0	0	0	0	0	0	0	0	0	0	0	0	0	0	0	0	0	0	0	0	0	0	0	0	0	0	0	0	0	0	0	0	0	60	0	0
Attheya	0.986842	FJ002122	Attheya	Attheyaceae	Chaetocerotales	Mediophyceae	genus	[]	NA	265578	aaacgttactgctgcgtctatggaaaatgtttacaaacgtgctgaatttgctaagcaagttggttctgtaatcatc	38	0	0	0	0	0	0	0	0	0	0	0	0	0	0	0	0	0	0	0	0	0	0	0	0	0	0	0	0	0	0	0	0	10	0	28	0	0
Attheya	0.986842	FJ002122	Attheya	Attheyaceae	Chaetocerotales	Mediophyceae	genus	[]	NA	265578	aaaagttactgctgcgactatggaaaatgtttacaaacgtgctgaatttgctaagcaagttggttctgtaatcatc	29	0	0	0	0	0	0	0	0	0	0	0	0	0	0	0	0	0	0	0	0	0	0	0	0	0	0	0	0	0	0	0	0	0	0	29	0	0
Attheya	0.986842	FJ002122	Attheya	Attheyaceae	Chaetocerotales	Mediophyceae	genus	[]	NA	265578	aaacgtttctgctgcgactatggaaaatgtttacaaacgtgctgaatttgctaagcaagttggttctgtaatcatc	25	0	0	0	0	0	0	0	0	0	0	0	0	0	0	0	0	0	0	0	0	0	0	0	0	0	0	0	0	0	0	0	0	0	0	25	0	0
Attheya	0.973684	FJ002122	Attheya	Attheyaceae	Chaetocerotales	Mediophyceae	genus	[]	NA	265578	aaacgttactgctgcgactatggaagatgtttacaaacgtgctgaatttgctaagcaagttggttccgtaatcatc	18	0	0	0	0	0	0	0	0	0	0	0	0	0	0	0	0	0	0	0	0	0	0	0	0	0	0	0	18	0	0	0	0	0	0	0	0	0
Attheya	0.973684	FJ002122	Attheya	Attheyaceae	Chaetocerotales	Mediophyceae	genus	[]	NA	265578	aaacgttactgctgcgactatggaagatgtttacaaacgtgctgaatttgctaagcaagttggttctgtaaccatc	16	0	0	0	0	0	0	0	0	0	0	0	0	0	0	0	0	0	0	0	0	0	0	0	0	0	0	0	16	0	0	0	0	0	0	0	0	0
Attheya septentrionalis	1	FJ002121	Attheya	Attheyaceae	Chaetocerotales	Mediophyceae	species	['Attheya septentrionalis']	Attheya septentrionalis	420275	aaacgtaactgctgcgactatggaaaacgtttacaaacgtgctgaattcgctaagcaagttggttctgtaatcatc	854	0	0	0	236	36	0	0	0	582	0	0	0	0	0	0	0	0	0	0	0	0	0	0	0	0	0	0	0	0	0	0	0	0	0	0	0	0
Aulacoseira subarctica	1	AY569592	Aulacoseira	Aulacoseiraceae	Aulacoseirales	Coscinodiscophyceae	species	['Aulacoseira subarctica']	Aulacoseira subarctica	202472	aaacgttactgctgctacaatggatgaagtaatcaaacgtgcagaatatgctaaagaagtaggttctgtaattatc	16353	0	0	0	0	0	0	0	0	0	0	0	0	0	0	0	0	0	0	0	0	0	0	0	0	0	0	0	0	0	0	0	0	0	0	0	16353	0
Aulacoseira subarctica	0.986842	AY569592	Aulacoseira	Aulacoseiraceae	Aulacoseirales	Coscinodiscophyceae	species	['Aulacoseira subarctica']	Aulacoseira subarctica	202472	aaacgttactgctgctacaatggatgaagtaatcaaacgttcagaatatgctaaagaagtaggttctgtaattatc	16	0	0	0	0	0	0	0	0	0	0	0	0	0	0	0	0	0	0	0	0	0	0	0	0	0	0	0	0	0	0	0	0	0	0	0	16	0
Bacillaria sp.	0.973684	MH064069	Bacillaria	Bacillariaceae	Bacillariales	Bacillariophyceae	species	['Bacillaria sp.']	Bacillaria sp.	2014767	aaacgttacagctgcaacaatggaagaagtgtacaaacgtgctgagtacgctaaagaagttggttctgtaattatc	26092	0	0	0	265	0	0	104	10	0	0	1642	219	156	503	0	0	0	0	173	0	0	0	0	1931	0	0	0	0	0	0	0	0	11984	0	0	9105	0
Bacillaria sp.	0.921053	MH064069	Bacillaria	Bacillariaceae	Bacillariales	Bacillariophyceae	species	['Bacillaria sp.']	Bacillaria sp.	2014767	aaatgttacatctgcaacaatggaagaagtgtacaaacgtgctgagtacgctaaagaagttggttctgtagtcatc	14652	0	0	0	0	0	0	0	0	0	0	0	0	0	0	1316	0	0	0	0	0	0	11512	0	0	0	0	0	0	0	0	0	346	1478	0	0	0	0
Bacillaria sp.	0.947368	MH064069	Bacillaria	Bacillariaceae	Bacillariales	Bacillariophyceae	species	['Bacillaria sp.']	Bacillaria sp.	2014767	aaacgttacatctgcaacaatggaagaagtgtacaaacgtgctgagtacgctaaagaagttggttctgtaatcatc	7545	0	0	0	0	0	0	0	0	135	0	0	12	0	0	0	0	0	628	0	0	0	0	89	0	0	0	0	6681	0	0	0	0	0	0	0	0	0
Bacillaria sp.	0.947368	MH064069	Bacillaria	Bacillariaceae	Bacillariales	Bacillariophyceae	species	['Bacillaria sp.']	Bacillaria sp.	2014767	aaacgttacagctgcaacaatggaagaagtgtacaaacgtgctgagtacgctaaagaagttggttctgtgatcatc	7438	0	0	97	0	63	0	72	79	177	143	0	109	0	1378	0	0	0	0	0	0	0	0	0	0	0	0	0	16	0	0	0	0	5304	0	0	0	0
Bacillaria sp.	0.947368	MH064069	Bacillaria	Bacillariaceae	Bacillariales	Bacillariophyceae	species	['Bacillaria sp.']	Bacillaria sp.	2014767	aaacgttacatctgcaacaatggaagaagtgtacaaacgtgctgagtacgctaaagaagttggttctgtagttatt	6543	0	0	0	0	0	0	0	0	0	0	0	0	0	0	0	0	0	0	0	0	0	0	0	0	0	0	0	0	0	0	0	6543	0	0	0	0	0
Bacillaria sp.	0.960526	MH064069	Bacillaria	Bacillariaceae	Bacillariales	Bacillariophyceae	species	['Bacillaria sp.']	Bacillaria sp.	2014767	aaacgttacatctgcaacaatggaagaagtgtacaaacgtgctgagtacgctaaagaagttggttctgtaattatc	4703	0	0	0	0	0	0	0	0	0	0	0	0	0	0	0	0	0	0	0	0	0	0	0	0	0	0	0	0	0	4703	0	0	0	0	0	0	0
Bacillaria sp.	0.960526	MH064069	Bacillaria	Bacillariaceae	Bacillariales	Bacillariophyceae	species	['Bacillaria sp.']	Bacillaria sp.	2014767	aaacgttacagctgcaacaatggaagaagtgtacaaacgtgctgagtacgctaaagaagttggttctgtaatcatc	957	0	0	0	0	0	0	0	94	0	0	12	0	0	0	0	0	0	0	0	0	0	0	142	11	673	0	0	0	0	0	0	0	13	0	0	12	0
Bacillaria sp.	0.960526	MH064069	Bacillaria	Bacillariaceae	Bacillariales	Bacillariophyceae	species	['Bacillaria sp.']	Bacillaria sp.	2014767	aaacgttatagctgcaacaatggaagaagtgtacaaacgtgctgagtacgctaaagaagttggttctgtaattatc	667	0	0	0	0	0	0	0	0	667	0	0	0	0	0	0	0	0	0	0	0	0	0	0	0	0	0	0	0	0	0	0	0	0	0	0	0	0
Bacillaria sp.	0.947368	MH064069	Bacillaria	Bacillariaceae	Bacillariales	Bacillariophyceae	species	['Bacillaria sp.']	Bacillaria sp.	2014767	aaacgttacagctgcaacaatggaagaagtatacaaacgtgctgagtacgctaaaaaagttggttctgtaattatc	440	0	0	0	440	0	0	0	0	0	0	0	0	0	0	0	0	0	0	0	0	0	0	0	0	0	0	0	0	0	0	0	0	0	0	0	0	0
Bacillaria sp.	0.960526	MH064069	Bacillaria	Bacillariaceae	Bacillariales	Bacillariophyceae	species	['Bacillaria sp.']	Bacillaria sp.	2014767	aaacgttacagctgcaacaatggaagaagtgtacaaacgtgctgagtacgctaaagaagttggttctgtagttatc	343	0	0	0	0	0	0	0	0	0	0	0	0	0	0	0	0	0	0	0	0	0	200	0	0	0	0	0	0	0	0	0	0	143	0	0	0	0
Bacillaria sp.	0.960526	MH064069	Bacillaria	Bacillariaceae	Bacillariales	Bacillariophyceae	species	['Bacillaria sp.']	Bacillaria sp.	2014767	aaacgttacagctgcaacaatggaagaagtgtacaaacgtgttgagtacgctaaagaagttggttctgtaattatc	70	0	0	0	0	0	0	70	0	0	0	0	0	0	0	0	0	0	0	0	0	0	0	0	0	0	0	0	0	0	0	0	0	0	0	0	0	0
Bacillaria sp.	0.934211	MH064069	Bacillaria	Bacillariaceae	Bacillariales	Bacillariophyceae	species	['Bacillaria sp.']	Bacillaria sp.	2014767	aaacgttacagctgcaacaatgaaagaagtgtacaaacgtgctgagtacgctaaagaagttggttctgtgatcatc	66	0	0	0	0	0	0	0	0	0	66	0	0	0	0	0	0	0	0	0	0	0	0	0	0	0	0	0	0	0	0	0	0	0	0	0	0	0
Bacillaria sp.	0.947368	MH064069	Bacillaria	Bacillariaceae	Bacillariales	Bacillariophyceae	species	['Bacillaria sp.']	Bacillaria sp.	2014767	aaatgttacatctgcaacaatggaagaagtgtacaaacgtgctgagtacgctaaagaagttggttctgtaattatc	30	0	0	0	0	0	0	0	0	0	0	0	0	0	0	30	0	0	0	0	0	0	0	0	0	0	0	0	0	0	0	0	0	0	0	0	0	0
Bacillaria sp.	0.960526	MH064069	Bacillaria	Bacillariaceae	Bacillariales	Bacillariophyceae	species	['Bacillaria sp.']	Bacillaria sp.	2014767	aaacgtaacagctgcaacaatggaagaagtgtacaaacgtgctgagtacgctaaagaagttggttctgtaattatc	27	0	0	0	0	0	0	0	0	0	0	0	0	17	0	0	0	0	0	10	0	0	0	0	0	0	0	0	0	0	0	0	0	0	0	0	0	0
Bacillaria sp.	0.960526	MH064069	Bacillaria	Bacillariaceae	Bacillariales	Bacillariophyceae	species	['Bacillaria sp.']	Bacillaria sp.	2014767	aaacgttacagctgcagcaatggaagaagtgtacaaacgtgctgagtacgctaaagaagttggttctgtaattatc	22	0	0	0	0	0	0	0	0	0	0	0	0	0	0	0	0	0	0	0	0	0	0	0	0	0	0	0	0	0	0	0	0	22	0	0	0	0
Bacillaria sp.	0.960526	MH064069	Bacillaria	Bacillariaceae	Bacillariales	Bacillariophyceae	species	['Bacillaria sp.']	Bacillaria sp.	2014767	aaacattacagctgcgacaatggaagaagtatacaaacgtgctgagtacgctaaagaagttggttctgtaattatc	21	0	0	0	0	0	0	0	0	0	0	0	0	0	0	21	0	0	0	0	0	0	0	0	0	0	0	0	0	0	0	0	0	0	0	0	0	0
Bacillaria sp.	0.921053	MH064069	Bacillaria	Bacillariaceae	Bacillariales	Bacillariophyceae	species	['Bacillaria sp.']	Bacillaria sp.	2014767	aaacgttacagctgcaacaatgaaaaaagtgtacaaacgtgctgagtacgctaaagaagttggttctgtgatcatc	18	0	0	0	0	0	0	0	18	0	0	0	0	0	0	0	0	0	0	0	0	0	0	0	0	0	0	0	0	0	0	0	0	0	0	0	0	0
Bacillaria sp.	0.921053	MH064069	Bacillaria	Bacillariaceae	Bacillariales	Bacillariophyceae	species	['Bacillaria sp.']	Bacillaria sp.	2014767	aaatgttacatctgcaacaatggaagaagtgtacaaacgtgctgagtacgctaaagaagttggttctgtagtcata	16	0	0	0	0	0	0	0	0	0	0	0	0	0	0	0	0	0	0	0	0	0	16	0	0	0	0	0	0	0	0	0	0	0	0	0	0	0
Bacillaria sp.	0.934211	MH064069	Bacillaria	Bacillariaceae	Bacillariales	Bacillariophyceae	species	['Bacillaria sp.']	Bacillaria sp.	2014767	aaacgttacagctgcaacaatggaagaagtgtacaaacgtgctgagtacgctaaggaagttggttctgtgatcatc	13	0	0	0	0	0	0	0	0	0	0	0	0	0	0	0	0	0	0	0	0	0	0	0	0	0	0	0	0	0	0	0	0	13	0	0	0	0
Bacillaria sp.	0.934211	MH064069	Bacillaria	Bacillariaceae	Bacillariales	Bacillariophyceae	species	['Bacillaria sp.']	Bacillaria sp.	2014767	aaacgttacatctgcaacaatggaagaagtgtacaaacgtgctgagtacgctaaagaagttggttctgtagtcatc	12	0	0	0	0	0	0	0	0	0	0	0	0	0	0	0	0	0	0	0	0	0	12	0	0	0	0	0	0	0	0	0	0	0	0	0	0	0
Bacillaria sp.	0.947368	MH064069	Bacillaria	Bacillariaceae	Bacillariales	Bacillariophyceae	species	['Bacillaria sp.']	Bacillaria sp.	2014767	aaacgttacatctgcaacaatggaagaagtgtacaaacgtgctgagtacgctaaagaggttggttctgtaattatt	11	0	0	0	0	0	0	0	0	0	0	0	0	0	0	0	0	0	0	0	0	0	0	0	0	0	0	0	0	0	11	0	0	0	0	0	0	0
Bacillaria sp.	0.960526	MH064069	Bacillaria	Bacillariaceae	Bacillariales	Bacillariophyceae	species	['Bacillaria sp.']	Bacillaria sp.	2014767	aaacataacagctgcaacaatggaagaagtgtacaaacgtgctgagtacgctaaagaagttggttctgtaatcatc	10	0	0	0	0	0	0	0	0	0	0	0	0	0	0	0	0	0	0	0	0	0	0	0	0	0	0	0	0	0	0	0	0	0	0	10	0	0
Bacillariaceae	0.934211	EF423502	NA	Bacillariaceae	Bacillariales	Bacillariophyceae	family	['Pseudo-nitzschia fraudulenta', 'Pseudo-nitzschia multistriata', 'Pseudo-nitzschia pungens', 'Nitzschia cf. microcephala LRT-2013', 'Pseudo-nitzschia galaxiae', 'Pseudo-nitzschia multiseries', 'Fragilariopsis kerguelensis', 'Pseudo-nitzschia brasiliana', 'Nitzschia aurariae']	NA	33852	aaacgttacagcttctactatggaagaagttattaaacgttgtgagtacgctaaagaagtaggttctatcgttgta	24363	0	0	0	0	0	0	0	0	0	0	0	0	0	0	0	0	0	0	0	0	0	0	0	0	0	0	0	0	0	0	0	0	0	0	277	0	24086
Bacillariaceae	0.947368	KY320315	NA	Bacillariaceae	Bacillariales	Bacillariophyceae	family	['Bacillaria paxillifer', 'Nitzschia liebethruthii']	NA	33852	aaacgttacaggtgctactatggaagaagtgtacaaacgttctgagtacgctaaagaagtaggttctattgttatc	17494	1087	56	770	2670	522	446	715	1985	4438	170	1825	116	143	285	470	0	49	57	0	0	0	699	0	0	0	0	0	308	0	0	0	0	683	0	0	0	0
Bacillariaceae	0.961039	KC969783	NA	Bacillariaceae	Bacillariales	Bacillariophyceae	family	['Nitzschia sp. 1BOF', 'Cylindrotheca sp. 2BOF']	NA	33852	aaacgttacagcagctactatggaagaagtatacaaacgtgctgagtatgctaaagaagtaggttctatcgttatc	13206	145	94	3386	2503	185	494	256	0	0	0	2668	1530	488	0	0	65	0	0	0	0	73	0	0	0	40	0	0	0	0	0	0	1279	0	0	0	0	0
Bacillariaceae	0.922078	MH064121	NA	Bacillariaceae	Bacillariales	Bacillariophyceae	family	['Nitzschia sp. (in: Bacillariophyta)', 'Cymbellonitzschia banzuensis']	NA	33852	aaacgttacagctgctacttatgaagaagttgttaaacgtgctgagtacgctaaagaagtaggttctgtagttatc	12771	0	42	514	0	0	0	240	0	75	0	0	0	0	0	0	0	0	80	49	6311	0	0	0	0	5460	0	0	0	0	0	0	0	0	0	0	0	0
Bacillariaceae	0.973684	KC969715	NA	Bacillariaceae	Bacillariales	Bacillariophyceae	family	['Nitzschia sp. 1BOF', 'Cylindrotheca closterium', 'Cylindrotheca sp. 1BOF', 'Cylindrotheca sp. 2BOF', 'Cylindrotheca sp. 3BOF']	NA	33852	aaacgttactgctgctactatggaagaagtatacaaacgtgctgagtatgctaaagaagtaggttcaatcgttatc	6929	0	0	0	27	0	0	0	0	0	0	0	0	0	0	63	0	0	0	0	490	0	0	0	0	0	0	0	0	0	6349	0	0	0	0	0	0	0
Bacillariaceae	0.921053	KP757864	NA	Bacillariaceae	Bacillariales	Bacillariophyceae	family	['Pseudo-nitzschia fryxelliana', 'Pseudo-nitzschia hasleana', 'Pseudo-nitzschia turgiduloides', 'Pseudo-nitzschia calliantha', 'Nitzschia cf. frustulum', 'Pseudo-nitzschia granii', 'Nitzschia cf. pusilla']	NA	33852	aaacgttacagcttctactatggaagaagttcttaaacgttgtgagtacgctaaagaagtaggttctatcgttgta	3801	0	0	0	0	26	0	0	0	0	0	0	0	0	0	71	121	96	1267	119	496	1605	0	0	0	0	0	0	0	0	0	0	0	0	0	0	0	0
Bacillariaceae	0.907895	HF675111	NA	Bacillariaceae	Bacillariales	Bacillariophyceae	family	['Nitzschia frustulum', 'Nitzschia soratensis', 'Pseudo-nitzschia calliantha', 'Nitzschia cf. frustulum', 'Nitzschia cf. pusilla']	NA	33852	aaacgttacagctgctacttgggaagaagtacttaaacgttgtgagtatgcaaaacaagtaggttctatcgttgtt	2205	31	115	206	88	0	0	256	20	12	35	248	10	0	0	0	13	0	20	0	14	81	0	869	0	137	0	16	0	0	0	0	0	0	0	0	0	34
Bacillariaceae	0.973684	KC969721	NA	Bacillariaceae	Bacillariales	Bacillariophyceae	family	['Nitzschia sp. 1BOF', 'Cylindrotheca closterium', 'Cylindrotheca sp. 1BOF', 'Cylindrotheca sp. 2BOF', 'Cylindrotheca sp. 3BOF']	NA	33852	aaacgttactgcagctactatggaagaagtttacaaacgttctgagtatgctaaagaagtaggttctatcgttatc	1888	0	0	0	0	0	0	0	0	0	0	0	0	0	0	0	0	0	0	0	0	0	0	0	0	0	0	0	0	0	0	1808	80	0	0	0	0	0
Bacillariaceae	0.935065	KY320315	NA	Bacillariaceae	Bacillariales	Bacillariophyceae	family	['Nitzschia sp. 1BOF', 'Nitzschia cf. frigida', 'Bacillaria paxillifer', 'Nitzschia liebethruthii']	NA	33852	aaacgttactgctgcaacaatggaagaagttatcaaacgtgctgagtacgctaaagaagtaggttctatagttatc	943	0	0	0	0	0	0	0	0	0	0	943	0	0	0	0	0	0	0	0	0	0	0	0	0	0	0	0	0	0	0	0	0	0	0	0	0	0
Bacillariaceae	0.909091	KP757864	NA	Bacillariaceae	Bacillariales	Bacillariophyceae	family	['Nitzschia frustulum', 'Pseudo-nitzschia fryxelliana', 'Pseudo-nitzschia hasleana', 'Nitzschia soratensis', 'Pseudo-nitzschia turgiduloides', 'Pseudo-nitzschia calliantha', 'Nitzschia cf. frustulum', 'Nitzschia cf. pusilla']	NA	33852	aaacgttacagctgctacttgggaagaagtacttaagcgttgtgagtatgcaaaacaagtaggttctatcgttgtt	494	0	0	79	0	0	0	264	0	0	0	0	0	0	0	0	0	0	0	0	0	0	0	151	0	0	0	0	0	0	0	0	0	0	0	0	0	0
Bacillariaceae	0.921053	JX970999	NA	Bacillariaceae	Bacillariales	Bacillariophyceae	family	['Nitzschia sp. 1BOF', 'Cylindrotheca sp.', 'Cylindrotheca closterium', 'Cylindrotheca sp. 1BOF', 'Cylindrotheca sp. 2BOF', 'Cylindrotheca sp. 3BOF', 'Cylindrotheca closterium lineage V', 'Cylindrotheca sp. lineage IV']	NA	33852	aaatgttactgccgcgacaatggaagaaatctacaaacgtgcagagtatgcgaaagaagtaggttctatcgttatc	420	0	0	0	0	0	0	39	0	381	0	0	0	0	0	0	0	0	0	0	0	0	0	0	0	0	0	0	0	0	0	0	0	0	0	0	0	0
Bacillariaceae	0.960526	KC969715	NA	Bacillariaceae	Bacillariales	Bacillariophyceae	family	['Nitzschia sp. 1BOF', 'Cylindrotheca closterium', 'Cylindrotheca sp. 1BOF', 'Cylindrotheca sp. 2BOF', 'Cylindrotheca sp. 3BOF']	NA	33852	aaacgttacttctgctactatggaagaagtatacaaacgtgctgagtatgctaaagaagtaggttctatagttatc	295	0	0	0	0	0	0	295	0	0	0	0	0	0	0	0	0	0	0	0	0	0	0	0	0	0	0	0	0	0	0	0	0	0	0	0	0	0
Bacillariaceae	0.973684	KC969715	NA	Bacillariaceae	Bacillariales	Bacillariophyceae	family	['Nitzschia sp. 1BOF', 'Cylindrotheca closterium', 'Cylindrotheca sp. 1BOF', 'Cylindrotheca sp. 2BOF', 'Cylindrotheca sp. 3BOF']	NA	33852	aaacgttactactgctactatggaagaagtatataaacgttctgagtatgctaaagaagtaggttctatcgttatc	217	0	0	0	0	0	0	0	217	0	0	0	0	0	0	0	0	0	0	0	0	0	0	0	0	0	0	0	0	0	0	0	0	0	0	0	0	0
Bacillariaceae	0.934211	MH064121	NA	Bacillariaceae	Bacillariales	Bacillariophyceae	family	['Nitzschia sp. (in: Bacillariophyta)', 'Cymbellonitzschia banzuensis']	NA	33852	gaacgttacagctgttactatggaagaagttatcaaacgtgctgaatacgctaaagaagtaggttctgtagttatc	190	0	0	0	0	0	0	0	0	0	0	0	0	0	190	0	0	0	0	0	0	0	0	0	0	0	0	0	0	0	0	0	0	0	0	0	0	0
Bacillariaceae	0.973684	KC969715	NA	Bacillariaceae	Bacillariales	Bacillariophyceae	family	['Nitzschia sp. 1BOF', 'Cylindrotheca closterium', 'Cylindrotheca sp. 1BOF', 'Cylindrotheca sp. 2BOF', 'Cylindrotheca sp. 3BOF']	NA	33852	aaacgttactgcagctactatggaagaagtatacaaacgtgctgagtatgctaaagaagtaggttctatcgttatc	104	0	0	33	0	0	0	0	0	0	0	23	33	0	0	15	0	0	0	0	0	0	0	0	0	0	0	0	0	0	0	0	0	0	0	0	0	0
Bacillariaceae	0.935065	JX971017	NA	Bacillariaceae	Bacillariales	Bacillariophyceae	family	['Nitzschia sp. 1BOF', 'Cylindrotheca closterium', 'Cylindrotheca sp. 2BOF']	NA	33852	aaacgttacaggtgctactatggaaaaagtatacaaacgttctgagtacgctaaagaagtaggttctattgttatc	87	0	0	0	0	0	87	0	0	0	0	0	0	0	0	0	0	0	0	0	0	0	0	0	0	0	0	0	0	0	0	0	0	0	0	0	0	0
Bacillariaceae	0.960526	KY320315	NA	Bacillariaceae	Bacillariales	Bacillariophyceae	family	['Bacillaria paxillifer', 'Nitzschia liebethruthii']	NA	33852	aaacgttacaggtgctactatggaagaagtgtacaaacgttctgagtacgctaaagaagtaggttctatcgttatc	79	0	0	0	0	49	0	0	0	30	0	0	0	0	0	0	0	0	0	0	0	0	0	0	0	0	0	0	0	0	0	0	0	0	0	0	0	0
Bacillariaceae	0.907895	KP757864	NA	Bacillariaceae	Bacillariales	Bacillariophyceae	family	['Nitzschia frustulum', 'Pseudo-nitzschia fryxelliana', 'Pseudo-nitzschia hasleana', 'Nitzschia soratensis', 'Nitzschia cf. microcephala LRT-2013', 'Pseudo-nitzschia turgiduloides', 'Pseudo-nitzschia calliantha', 'Pseudo-nitzschia dolorosa', 'Nitzschia cf. frustulum', 'Pseudo-nitzschia granii', 'Nitzschia cf. pusilla']	NA	33852	aaacgttatagcttctactatggaagaagttcttaaacgttgtgagtacgctaaagaagtaggttctatcgttgta	74	0	0	0	0	0	0	0	0	0	0	0	0	0	0	0	0	0	0	0	74	0	0	0	0	0	0	0	0	0	0	0	0	0	0	0	0	0
Bacillariaceae	0.947368	KY320315	NA	Bacillariaceae	Bacillariales	Bacillariophyceae	family	['Bacillaria paxillifer', 'Nitzschia liebethruthii']	NA	33852	aaacgttacagctgcaacaatggaagaagtgtacaaacgtgctgagtacgctaaagaagttggttcaatcgtaatc	61	0	0	0	0	0	0	0	0	0	0	0	0	13	16	0	0	0	0	0	0	0	0	0	0	32	0	0	0	0	0	0	0	0	0	0	0	0
Bacillariaceae	0.909091	MH064121	NA	Bacillariaceae	Bacillariales	Bacillariophyceae	family	['Nitzschia sp. (in: Bacillariophyta)', 'Cymbellonitzschia banzuensis']	NA	33852	aaacgttacagctgctacttatgaagaaattgttaaacgtgctgagtacgctaaagaagtaggttctgtagttatc	57	0	0	0	0	0	0	0	0	57	0	0	0	0	0	0	0	0	0	0	0	0	0	0	0	0	0	0	0	0	0	0	0	0	0	0	0	0
Bacillariaceae	0.961039	KC969783	NA	Bacillariaceae	Bacillariales	Bacillariophyceae	family	['Nitzschia sp. 1BOF', 'Cylindrotheca sp. 2BOF']	NA	33852	aaacgttacagctgccactatggaagaagtatacaaacgtgctgagtatgctaaagaagtaggttctatcgttatc	55	0	0	10	0	0	0	0	0	0	0	10	20	0	0	15	0	0	0	0	0	0	0	0	0	0	0	0	0	0	0	0	0	0	0	0	0	0
Bacillariaceae	0.960526	KC969715	NA	Bacillariaceae	Bacillariales	Bacillariophyceae	family	['Nitzschia sp. 1BOF', 'Cylindrotheca closterium', 'Cylindrotheca sp. 1BOF', 'Cylindrotheca sp. 2BOF', 'Cylindrotheca sp. 3BOF']	NA	33852	aaacgttacttctgctactatggaagaagtatacaaacgtgctgagtacgctaaagaagtaggttctatcgttatc	39	0	0	0	0	0	0	0	0	0	0	0	0	0	0	39	0	0	0	0	0	0	0	0	0	0	0	0	0	0	0	0	0	0	0	0	0	0
Bacillariaceae	0.973684	KC969715	NA	Bacillariaceae	Bacillariales	Bacillariophyceae	family	['Nitzschia sp. 1BOF', 'Cylindrotheca closterium', 'Cylindrotheca sp. 1BOF', 'Cylindrotheca sp. 2BOF', 'Cylindrotheca sp. 3BOF']	NA	33852	aaacgttacttctgctactatggaagaagtatacaaacgtgctgagtatgctaaagaagtaggttctatcgttatc	38	0	0	0	0	0	0	0	0	0	0	0	0	0	0	38	0	0	0	0	0	0	0	0	0	0	0	0	0	0	0	0	0	0	0	0	0	0
Bacillariaceae	0.973684	KC969721	NA	Bacillariaceae	Bacillariales	Bacillariophyceae	family	['Nitzschia sp. 1BOF', 'Cylindrotheca closterium', 'Cylindrotheca sp. 1BOF', 'Cylindrotheca sp. 2BOF', 'Cylindrotheca sp. 3BOF']	NA	33852	aaacgttactgcagctactatggaagaagtatacaaacgttccgagtatgctaaagaagtaggttctatcgttatc	27	0	0	0	0	27	0	0	0	0	0	0	0	0	0	0	0	0	0	0	0	0	0	0	0	0	0	0	0	0	0	0	0	0	0	0	0	0
Bacillariaceae	0.947368	KY320319	NA	Bacillariaceae	Bacillariales	Bacillariophyceae	family	['Nitzschia cf. paleacea', 'Bacillaria sp.']	NA	33852	aaacattactgctgcgacaatggaagaagtatacaaacgtgctgagtacgctaaagaagttggttctgtaattatc	24	0	0	0	0	0	0	0	0	0	0	0	0	0	0	24	0	0	0	0	0	0	0	0	0	0	0	0	0	0	0	0	0	0	0	0	0	0
Bacillariaceae	0.922078	EF423502	NA	Bacillariaceae	Bacillariales	Bacillariophyceae	family	['Pseudo-nitzschia caciantha', 'Pseudo-nitzschia fraudulenta', 'Pseudo-nitzschia pungens', 'Pseudo-nitzschia galaxiae']	NA	33852	aaacgttacagcttctactatggaagaagttattaaacgttgtgagtacgctaaaggagtaggttctatcgttgta	23	0	0	0	0	0	0	0	0	0	0	0	0	0	0	0	0	0	0	0	0	0	0	0	0	0	0	0	0	0	0	0	0	0	0	0	0	23
Bacillariaceae	0.909091	MH064121	NA	Bacillariaceae	Bacillariales	Bacillariophyceae	family	['Nitzschia sp. (in: Bacillariophyta)', 'Cymbellonitzschia banzuensis']	NA	33852	aaacgttacagctgctacttatgaagaagttgttaaacgtgctgagtacgttaaagaagtaggttctgtagttatc	22	0	0	0	0	0	0	22	0	0	0	0	0	0	0	0	0	0	0	0	0	0	0	0	0	0	0	0	0	0	0	0	0	0	0	0	0	0
Bacillariaceae	0.934211	FM207547	NA	Bacillariaceae	Bacillariales	Bacillariophyceae	family	['Pseudo-nitzschia fraudulenta', 'Pseudo-nitzschia multistriata', 'Pseudo-nitzschia pungens', 'Nitzschia cf. microcephala LRT-2013', 'Pseudo-nitzschia galaxiae', 'Pseudo-nitzschia multiseries', 'Fragilariopsis kerguelensis', 'Pseudo-nitzschia brasiliana', 'Nitzschia aurariae']	NA	33852	aaacgttacagcttctactatggaagaagttattaaacgttgtgagtacgctaaagaagtaggttctatagttgta	21	0	0	0	0	0	0	0	0	0	0	0	0	0	0	0	0	0	0	0	0	0	0	0	0	0	0	0	0	0	0	0	0	0	0	0	0	21
Bacillariaceae	0.960526	KC969721	NA	Bacillariaceae	Bacillariales	Bacillariophyceae	family	['Nitzschia sp. 1BOF', 'Cylindrotheca closterium', 'Cylindrotheca sp. 1BOF', 'Cylindrotheca sp. 2BOF', 'Cylindrotheca sp. 3BOF']	NA	33852	aaacattactgctgcgacaatggaagaagtatacaaacgttctgagtatgctaaagaagtaggttctatcgttatc	13	0	0	0	0	0	0	0	0	0	0	0	0	0	0	0	0	13	0	0	0	0	0	0	0	0	0	0	0	0	0	0	0	0	0	0	0	0
Bacillariaceae	0.909091	MH064121	NA	Bacillariaceae	Bacillariales	Bacillariophyceae	family	['Nitzschia sp. (in: Bacillariophyta)', 'Cymbellonitzschia banzuensis']	NA	33852	aaacgttacagctgctacttatgaagaagttgttaaacgtgctgagtacgctaaagaagtaggttccgtagttatc	13	0	0	0	0	0	0	0	0	0	0	0	0	0	0	0	0	0	0	0	0	0	0	0	0	13	0	0	0	0	0	0	0	0	0	0	0	0
Bacillariaceae	0.973684	KC969721	NA	Bacillariaceae	Bacillariales	Bacillariophyceae	family	['Nitzschia sp. 1BOF', 'Cylindrotheca closterium', 'Cylindrotheca sp. 1BOF', 'Cylindrotheca sp. 2BOF', 'Cylindrotheca sp. 3BOF']	NA	33852	aaacattactgcagctactatggaagaagtatacaaacgttctgagtatgctaaagaagtaggttctatcgttatc	12	0	0	0	0	0	0	0	0	0	0	0	0	0	0	0	0	12	0	0	0	0	0	0	0	0	0	0	0	0	0	0	0	0	0	0	0	0
Bacillariaceae	0.960526	KC969715	NA	Bacillariaceae	Bacillariales	Bacillariophyceae	family	['Nitzschia sp. 1BOF', 'Cylindrotheca closterium', 'Cylindrotheca sp. 1BOF', 'Cylindrotheca sp. 2BOF', 'Cylindrotheca sp. 3BOF']	NA	33852	aaacgttactgctgctactatggaagaagtatacaaacgtgctgagtatgctaaagaagtaggttctatcgttgtt	12	0	0	0	0	0	0	0	0	0	0	0	0	0	0	12	0	0	0	0	0	0	0	0	0	0	0	0	0	0	0	0	0	0	0	0	0	0
Bacillariaceae	0.960526	KY320315	NA	Bacillariaceae	Bacillariales	Bacillariophyceae	family	['Bacillaria paxillifer', 'Nitzschia liebethruthii']	NA	33852	aaacgttacagctgccactatggaagaagtatacaaacgtgctgagtacgctaaagaagtaggttctatagttatc	11	0	0	0	0	0	0	0	0	0	0	0	0	0	0	11	0	0	0	0	0	0	0	0	0	0	0	0	0	0	0	0	0	0	0	0	0	0
Bacillariaceae	0.934211	KP757864	NA	Bacillariaceae	Bacillariales	Bacillariophyceae	family	['Pseudo-nitzschia hasleana', 'Pseudo-nitzschia calliantha', 'Pseudo-nitzschia turgiduloides', 'Pseudo-nitzschia fryxelliana']	NA	33852	aaacgttacagcttctactatggaagaagttcttaagcgttgtgagtacgctaaagaagtaggttctatcgttgta	10	0	0	0	0	0	0	0	0	0	0	0	0	0	0	0	0	0	0	10	0	0	0	0	0	0	0	0	0	0	0	0	0	0	0	0	0	0
Bacillariaceae	0.921053	DQ813824	NA	Bacillariaceae	Bacillariales	Bacillariophyceae	family	['Pseudo-nitzschia pungens', 'Pseudo-nitzschia fryxelliana', 'Pseudo-nitzschia hasleana', 'Pseudo-nitzschia turgiduloides', 'Pseudo-nitzschia calliantha', 'Nitzschia cf. frustulum', 'Nitzschia cf. pusilla']	NA	33852	aaacgttacagcttctactatggaagaagttcttaaacgttgtgagtacgctaaagaagtaggttctatcgtcgtt	10	0	0	0	0	0	0	0	0	0	0	0	0	0	0	0	0	0	0	0	0	10	0	0	0	0	0	0	0	0	0	0	0	0	0	0	0	0
Bacillariophycidae	0.961039	MF000636	NA	NA	NA	Bacillariophyceae	no rank	['Campylodiscus sp. 3613.8', 'Cymatopleura solea', 'Entomoneis cf. alata', 'Petrodictyon gemma', 'Entomoneis sp.']	NA	33850	aaacatcactgctggtacaatggaagaagtttacaagcgtgctgagtacgctaagcaagtaggttctatcgttgtt	85936	10	30	0	0	0	0	0	0	0	0	0	0	0	0	0	0	1022	0	0	0	0	0	0	0	0	3945	121	13544	0	0	3928	0	0	18064	39764	0	5508
Bacillariophycidae	0.909091	KY320308	NA	NA	NA	Bacillariophyceae	no rank	[]	NA	33850	aaacgtgacagcagctacaatggaagaagtgtacaaacgtgcagagtacgctaaaactgttggttctgtcgttgtt	63000	54	73	416	842	324	398	510	1477	3225	306	1544	1084	1495	3786	0	552	1983	830	1309	13239	3374	2195	0	0	0	0	0	10460	9258	0	0	0	0	4266	0	0	0
Bacillariophycidae	0.973684	KJ463471	NA	NA	NA	Bacillariophyceae	no rank	[]	NA	33850	aaacatcactgcaggtacaatggaagaagtttacaaacgtgctgagtacgctaaatcagtaggttctgtagttgta	28062	131	217	1339	1693	194	363	451	248	109	42	0	799	86	2971	619	438	1022	931	301	10049	1198	0	4861	0	0	0	0	0	0	0	0	0	0	0	0	0	0
Bacillariophycidae	0.921053	KU179122	NA	NA	NA	Bacillariophyceae	no rank	['Parlibellus hamulifer', 'Halamphora adumbratoides', 'Stauroneis schmidiae', 'Amphora sp. CTM 20023']	NA	33850	taacgttactgctggtactatggaagaagtttacaaacgtgctgcttacgctaaagcagttggttctgtagttatc	27603	0	0	155	0	0	21	29	50	369	0	0	497	2224	0	0	0	0	0	0	0	31	14695	32	73	125	0	6078	0	0	0	1415	1733	76	0	0	0	0
Bacillariophycidae	0.910256	HF675103	NA	NA	NA	Bacillariophyceae	no rank	['Nitzschia aurariae', 'Pseudo-nitzschia pungens', 'Pseudo-nitzschia multiseries', 'Pseudo-nitzschia galaxiae', 'Nitzschia cf. microcephala LRT-2013', 'Pseudo-nitzschia calliantha', 'Nitzschia cf. pusilla']	NA	33850	aaacgttacagctgctacttgggaagaagtacttaaacgtatggaatacgctaaagaagtaggttctatcgttgtt	19591	399	55	830	152	77	133	32	360	93	150	24	113	30	69	0	42	21	126	426	1064	40	538	2866	1242	0	133	0	0	26	0	4386	0	1022	43	0	5099	0
Bacillariophycidae	0.907895	KU179122	NA	NA	NA	Bacillariophyceae	no rank	['Parlibellus hamulifer', 'Stauroneis schmidiae', 'Campylodiscus daemelianus', 'Campylodiscus sp.', 'Amphora sp. CTM 20023', 'Amphora cf. semperpalorum', 'Halamphora semperpalorum', 'Campylodiscus echeneis', 'Halamphora intramaritima', 'Halamphora americana', 'Halamphora adumbratoides', 'Astartiella sp.', 'Halamphora calidilacuna']	NA	33850	taacgttactgctggtactatggaagaagtttacaaacgtgctacttacgctaaagcagttggttctgtagttatc	9434	0	0	0	0	0	0	0	0	997	0	0	0	0	0	0	0	0	0	0	0	0	1001	244	0	0	0	0	0	0	0	0	0	0	7192	0	0	0
Bacillariophycidae	0.960526	AY571757	NA	NA	NA	Bacillariophyceae	no rank	['Entomoneis sp.', 'Amphora hyalina', 'Campylodiscus sp. 3613.8', 'Cymatopleura solea', 'Didymosphenia geminata', 'Entomoneis cf. alata', 'Navicula tripunctata', 'Petrodictyon gemma', 'Halamphora isumiensis', 'Thalassiophysa hyalina', 'Campylodiscus impressus', 'Campylodiscus samoensis', 'Petroneis humerosa']	NA	33850	aaacatcactgcaggtacaatggaagaagtttacaaacgtgctgagtacgctaaagccgttggttctatcgttgtt	8669	0	0	0	0	0	0	20	0	14	0	0	0	0	0	0	0	0	0	0	0	0	0	0	534	0	0	0	0	0	0	0	0	0	0	0	0	8101
Bacillariophycidae	0.973684	MF000636	NA	NA	NA	Bacillariophyceae	no rank	['Campylodiscus sp. 3613.8', 'Petrodictyon gemma', 'Entomoneis sp.', 'Entomoneis cf. alata']	NA	33850	aaacatcactgccggtacaatggaagaagtttacaaacgtgctgagtacgctaaagcagtaggttctatcgttgta	4254	0	0	0	0	0	0	0	0	0	0	0	0	0	0	0	0	0	0	0	0	0	0	0	0	0	0	0	0	0	0	0	0	4254	0	0	0	0
Bacillariophycidae	0.909091	KM084984	NA	NA	NA	Bacillariophyceae	no rank	[]	NA	33850	aaacatcactgctggtaatatggaagaagtttatgctcgtgcagagtatgctaaatcagttggttcgattattgtt	3900	0	0	0	0	0	0	0	0	0	0	0	0	0	0	0	0	0	0	0	0	0	0	0	3900	0	0	0	0	0	0	0	0	0	0	0	0	0
Bacillariophycidae	0.960526	AM710459	NA	NA	NA	Bacillariophyceae	no rank	[]	NA	33850	aaacatcactgctggtacaatggaagaagtttacaaacgtgctgagtatgctaaagctgttggttctatcgttgta	2666	0	0	0	0	0	0	0	0	0	0	0	0	0	2666	0	0	0	0	0	0	0	0	0	0	0	0	0	0	0	0	0	0	0	0	0	0	0
Bacillariophycidae	0.907895	KU179122	NA	NA	NA	Bacillariophyceae	no rank	['Parlibellus hamulifer', 'Stauroneis schmidiae', 'Campylodiscus daemelianus', 'Campylodiscus sp.', 'Amphora sp. CTM 20023', 'Amphora cf. semperpalorum', 'Halamphora semperpalorum', 'Campylodiscus echeneis', 'Halamphora intramaritima', 'Halamphora americana', 'Halamphora adumbratoides', 'Astartiella sp.', 'Halamphora calidilacuna']	NA	33850	taacgttactgctggtactatggaagaagtttacaaacgtgcttcttacgctaaagcagttggttctgtagttatc	2526	0	0	0	0	0	0	0	0	0	0	0	0	0	0	0	0	0	0	0	0	0	0	10	2516	0	0	0	0	0	0	0	0	0	0	0	0	0
Bacillariophycidae	0.907895	KU179122	NA	NA	NA	Bacillariophyceae	no rank	[]	NA	33850	taacgttactgctggtactatggaagaagtttacaaacgtgctgcttacgctaaagcagttggttctgtagttatg	1657	0	0	0	0	0	0	0	0	0	0	0	0	0	0	0	0	0	0	0	0	0	1657	0	0	0	0	0	0	0	0	0	0	0	0	0	0	0
Bacillariophycidae	0.973684	MF000636	NA	NA	NA	Bacillariophyceae	no rank	['Campylodiscus sp. 3613.8', 'Petrodictyon gemma', 'Entomoneis sp.', 'Entomoneis cf. alata']	NA	33850	aaacatcactgctggtacaatggaagaagtttacaaacgtgctgagtacgctaaagccgttggttctatcgttgtt	1069	0	0	0	0	0	0	0	0	108	0	0	719	13	29	0	0	0	0	0	0	0	0	0	0	0	0	0	0	0	200	0	0	0	0	0	0	0
Bacillariophycidae	0.960526	MF000636	NA	NA	NA	Bacillariophyceae	no rank	['Campylodiscus sp. 3613.8', 'Cymatopleura solea', 'Didymosphenia geminata', 'Entomoneis cf. alata', 'Petrodictyon gemma', 'Halamphora isumiensis', 'Thalassiophysa hyalina', 'Entomoneis sp.']	NA	33850	aaacatcactgctggtacaatggaagaagtttacaaacgtgctgagtacgctaaagccgttggttctatcgttatt	865	0	0	0	0	0	0	0	0	0	0	0	0	0	0	865	0	0	0	0	0	0	0	0	0	0	0	0	0	0	0	0	0	0	0	0	0	0
Bacillariophycidae	0.907895	KU179122	NA	NA	NA	Bacillariophyceae	no rank	['Parlibellus hamulifer', 'Stauroneis schmidiae', 'Campylodiscus daemelianus', 'Campylodiscus sp.', 'Amphora sp. CTM 20023', 'Amphora cf. semperpalorum', 'Halamphora semperpalorum', 'Campylodiscus echeneis', 'Halamphora intramaritima', 'Halamphora americana', 'Halamphora adumbratoides', 'Astartiella sp.', 'Halamphora calidilacuna']	NA	33850	taacgttactgctggtactatggaagaagtttacaaacgtgctacttacgctaaagcagttggttctgtaatcatc	370	0	0	0	0	0	0	0	0	0	0	0	0	0	0	0	0	0	0	0	0	0	0	0	0	0	0	0	0	0	0	0	0	0	370	0	0	0
Bacillariophycidae	0.909091	FM207547	NA	NA	NA	Bacillariophyceae	no rank	['Nitzschia sp. 1BOF', 'Pseudo-nitzschia fraudulenta', 'Pseudo-nitzschia multistriata', 'Pseudo-nitzschia pungens', 'Nitzschia cf. microcephala LRT-2013', 'Pseudo-nitzschia hasleana', 'Pseudo-nitzschia galaxiae', 'Pseudo-nitzschia multiseries', 'Fragilariopsis kerguelensis', 'Pseudo-nitzschia brasiliana', 'Nitzschia aurariae']	NA	33850	aaacgttacagctgctacttgggaagaagtacttaaacgttgtgagtacgcaaaacaagtaggttctatcgttgtt	361	51	0	16	77	0	0	0	0	0	14	97	0	90	0	0	0	0	0	0	0	0	0	16	0	0	0	0	0	0	0	0	0	0	0	0	0	0
Bacillariophycidae	0.960526	AM710509	NA	NA	NA	Bacillariophyceae	no rank	['Navicula microdigitoradiata', 'Gomphoneis sp. TN-2014', 'Gomphoneis minuta', 'Navicula phyllepta']	NA	33850	aaacattactgcagctacaatggaagaagtgtacaaacgtgctgagtacgctaaagcagttggttctatcgttgta	270	270	0	0	0	0	0	0	0	0	0	0	0	0	0	0	0	0	0	0	0	0	0	0	0	0	0	0	0	0	0	0	0	0	0	0	0	0
Bacillariophycidae	0.986842	MG027452	NA	NA	NA	Bacillariophyceae	no rank	['Halamphora cymbifera', 'Cymatopleura elliptica']	NA	33850	aaacatcactgcaggtacaatggaagaagtttacaaacgtgctgagtacgctaaatcagtaggttctgtagttgtt	157	0	0	14	0	0	0	0	0	0	0	0	18	0	15	0	20	21	0	0	13	22	0	34	0	0	0	0	0	0	0	0	0	0	0	0	0	0
Bacillariophycidae	0.907895	KU179122	NA	NA	NA	Bacillariophyceae	no rank	['Parlibellus hamulifer', 'Stauroneis schmidiae', 'Campylodiscus daemelianus', 'Campylodiscus sp.', 'Amphora sp. CTM 20023', 'Amphora cf. semperpalorum', 'Halamphora semperpalorum', 'Campylodiscus echeneis', 'Halamphora intramaritima', 'Halamphora americana', 'Halamphora adumbratoides', 'Astartiella sp.', 'Halamphora calidilacuna']	NA	33850	taacgttactgctgatactatggaagaagtttacaaacgtgctgcttacgctaaagcagttggttctgtagttatc	134	0	0	0	0	0	0	0	0	0	0	0	0	0	0	0	0	134	0	0	0	0	0	0	0	0	0	0	0	0	0	0	0	0	0	0	0	0
Bacillariophycidae	0.961039	MF000636	NA	NA	NA	Bacillariophyceae	no rank	['Campylodiscus sp. 3613.8', 'Cymatopleura solea', 'Entomoneis cf. alata', 'Petrodictyon gemma', 'Entomoneis sp.']	NA	33850	aaacatcactgctggtacaatggaagaagtttacaagcgtgctgagtacgctaagcaggtaggttctatcgttgtt	104	0	0	0	0	0	0	0	0	0	0	0	0	0	0	0	0	0	0	0	0	0	0	0	0	0	0	0	19	0	0	0	0	0	23	52	0	10
Bacillariophycidae	0.974026	MG027493	NA	NA	NA	Bacillariophyceae	no rank	['Halamphora pseudoholsatica', 'Cymatopleura elliptica', 'Halamphora pellicula', 'Halamphora holsatica']	NA	33850	aaacatcactgcaggtacaatggaagaagtttacaaacgtgctgagtacgctaagtcagtaggttctgtaattgta	100	0	0	0	0	0	0	100	0	0	0	0	0	0	0	0	0	0	0	0	0	0	0	0	0	0	0	0	0	0	0	0	0	0	0	0	0	0
Bacillariophycidae	0.960526	HQ912468	NA	NA	NA	Bacillariophyceae	no rank	['Pinnularia brebissonii', 'Pinnularia borealis', 'Entomoneis sp.', 'Surirella sp.', 'Caloneis sp.', 'Campylodiscus impressus', 'Pinnularia cf. microstauron']	NA	33850	aaacatcactgctggtacaatggaagaagtgtacaaacgtgcagaatacgctaaaacagtaggttctgtaattgtt	80	0	0	0	0	0	0	0	0	0	0	0	80	0	0	0	0	0	0	0	0	0	0	0	0	0	0	0	0	0	0	0	0	0	0	0	0	0
Bacillariophycidae	0.921053	KX120600	NA	NA	NA	Bacillariophyceae	no rank	[]	NA	33850	taacgttactgctggtactatggaagaagtttacaaacgtgctgcttacgctaaagcagttggttctgtagttatt	58	0	0	0	0	0	0	0	0	0	0	0	0	0	0	0	0	0	0	0	0	0	58	0	0	0	0	0	0	0	0	0	0	0	0	0	0	0
Bacillariophycidae	0.907895	KU179122	NA	NA	NA	Bacillariophyceae	no rank	['Parlibellus hamulifer', 'Stauroneis schmidiae', 'Campylodiscus daemelianus', 'Campylodiscus sp.', 'Amphora sp. CTM 20023', 'Amphora cf. semperpalorum', 'Halamphora semperpalorum', 'Campylodiscus echeneis', 'Halamphora intramaritima', 'Halamphora americana', 'Halamphora adumbratoides', 'Astartiella sp.', 'Halamphora calidilacuna']	NA	33850	taacgttactgctggtactatggaagaagtttacaaacgtgctgcttacactaaagcagttggttctgtagttatc	56	0	0	0	0	0	0	0	0	0	0	0	0	0	0	0	0	0	0	0	0	0	0	0	0	56	0	0	0	0	0	0	0	0	0	0	0	0
Bacillariophycidae	0.960526	KJ463471	NA	NA	NA	Bacillariophyceae	no rank	[]	NA	33850	aaacatcactgcaggtacaatggaagaagtttacaaacgtgctgagtacgctaaatcagtaagttctgtagttgta	47	0	0	0	0	0	0	0	0	0	0	0	0	47	0	0	0	0	0	0	0	0	0	0	0	0	0	0	0	0	0	0	0	0	0	0	0	0
Bacillariophycidae	0.907895	KU179122	NA	NA	NA	Bacillariophyceae	no rank	['Parlibellus hamulifer', 'Stauroneis schmidiae', 'Campylodiscus daemelianus', 'Campylodiscus sp.', 'Amphora sp. CTM 20023', 'Amphora cf. semperpalorum', 'Halamphora semperpalorum', 'Campylodiscus echeneis', 'Halamphora intramaritima', 'Halamphora americana', 'Halamphora adumbratoides', 'Astartiella sp.', 'Halamphora calidilacuna']	NA	33850	taacgttactgctggtactatggaagaagcttacaaacgtgctgcttacgctaaagcagttggttctgtagttatc	43	0	0	0	0	0	0	0	0	43	0	0	0	0	0	0	0	0	0	0	0	0	0	0	0	0	0	0	0	0	0	0	0	0	0	0	0	0
Bacillariophycidae	0.960526	JX905561	NA	NA	NA	Bacillariophyceae	no rank	[]	NA	33850	aaacatcactgcaggtacaatggaagaagtttacaaacgtgctgagtatgctaaagccgttggttctatcgttgtt	40	0	0	0	0	0	0	40	0	0	0	0	0	0	0	0	0	0	0	0	0	0	0	0	0	0	0	0	0	0	0	0	0	0	0	0	0	0
Bacillariophycidae	0.947368	KT072927	NA	NA	NA	Bacillariophyceae	no rank	[]	NA	33850	aaacgttactgcagctactatggaagaagtttacaaacgtgcagaatatgctaaaatggttggttctgtaatcgtt	34	0	0	0	0	0	0	0	0	0	0	0	34	0	0	0	0	0	0	0	0	0	0	0	0	0	0	0	0	0	0	0	0	0	0	0	0	0
Bacillariophycidae	0.907895	KU179122	NA	NA	NA	Bacillariophyceae	no rank	['Parlibellus hamulifer', 'Stauroneis schmidiae', 'Campylodiscus daemelianus', 'Campylodiscus sp.', 'Amphora sp. CTM 20023', 'Amphora cf. semperpalorum', 'Halamphora semperpalorum', 'Campylodiscus echeneis', 'Halamphora intramaritima', 'Halamphora americana', 'Halamphora adumbratoides', 'Astartiella sp.', 'Halamphora calidilacuna']	NA	33850	taacgttactgctggtactatggaagaagtttacaaacgtgctgcttacgctaaagcagttggttctgtagttacc	33	0	0	0	0	0	0	0	0	0	0	0	0	0	0	0	0	0	0	0	0	0	14	0	19	0	0	0	0	0	0	0	0	0	0	0	0	0
Bacillariophycidae	0.960526	KJ463471	NA	NA	NA	Bacillariophyceae	no rank	[]	NA	33850	aaacatcaccgcaggtacaatggaagaagtttacaaacgtgctgagtacgctaaatcagtaggttctgtagttgta	25	0	0	0	0	0	0	0	0	0	0	0	0	0	0	0	0	0	0	0	14	0	0	11	0	0	0	0	0	0	0	0	0	0	0	0	0	0
Bacillariophycidae	0.909091	JN162824	NA	NA	NA	Bacillariophyceae	no rank	['Stauroneis constricta', 'Nitzschia sp. (in: Bacillariophyta)', 'Craspedostauros alyoubii']	NA	33850	aaacgttactgctgccacagtggacgaagttattaaacgtgcagagtacgctaaagaagtaggttctgtaattatc	24	0	0	0	0	0	0	24	0	0	0	0	0	0	0	0	0	0	0	0	0	0	0	0	0	0	0	0	0	0	0	0	0	0	0	0	0	0
Bacillariophycidae	0.961039	KY320281	NA	NA	NA	Bacillariophyceae	no rank	['Thalassiophysa hyalina', 'Entomoneis sp.', 'Halamphora isumiensis', 'Entomoneis cf. alata']	NA	33850	aaacatcactgctggtacaatggaagaagtttacaagcgtgctgagtacgctaagcaagtaggttctatcattgtt	22	0	0	0	0	0	0	0	0	0	0	0	0	0	0	0	0	0	0	0	0	0	0	0	0	0	0	0	0	0	0	0	0	0	0	22	0	0
Bacillariophycidae	0.973684	AM710462	NA	NA	NA	Bacillariophyceae	no rank	['Berkeleya sp. 1SEH', 'Gomphonema affine']	NA	33850	aaacatcactgctggtacaatggaagaagtttacaaacgtgctgagtatgctaaagctgttggttctattgttgtt	17	0	0	0	0	0	0	0	0	0	17	0	0	0	0	0	0	0	0	0	0	0	0	0	0	0	0	0	0	0	0	0	0	0	0	0	0	0
Bacillariophycidae	0.907895	KU179122	NA	NA	NA	Bacillariophyceae	no rank	[]	NA	33850	taacgttactgctggtactatggaagaagtttacaaacgtgctgtttacgctaaagcagttggttctgtagttatc	15	0	0	0	0	15	0	0	0	0	0	0	0	0	0	0	0	0	0	0	0	0	0	0	0	0	0	0	0	0	0	0	0	0	0	0	0	0
Bacillariophycidae	0.934211	KM078662	NA	NA	NA	Bacillariophyceae	no rank	[]	NA	33850	aaacattactgctggtacaatggaagacgtatacaaacgtgcagaatacgcgaaagctgtaggttctatcgttgtt	14	0	0	0	0	0	0	0	0	0	0	0	0	0	0	0	0	0	0	0	0	0	0	0	0	0	0	0	0	0	0	0	0	0	0	0	0	14
Bacillariophycidae	0.909091	JN162797	NA	NA	NA	Bacillariophyceae	no rank	['Navicula salinicola', 'Navicula sp. SZCZCH703', 'Nitzschia fontifuga', 'Nitzschia volvendirostrata', 'Navicula bottnica', 'Navicula sp.']	NA	33850	aaacatcacagcagctactatggaagaagtgtacaaacgtgctgagtacgctaaagaagttggttcaatcgtaatc	14	0	0	0	0	0	0	0	0	0	0	0	0	14	0	0	0	0	0	0	0	0	0	0	0	0	0	0	0	0	0	0	0	0	0	0	0	0
Bacillariophycidae	0.909091	JX905669	NA	NA	NA	Bacillariophyceae	no rank	['Navicula bottnica', 'Nitzschia fontifuga', 'Navicula sp. SZCZCH703', 'Navicula sp.']	NA	33850	aaacgtaacagctgcaacaatggaagaagtgtacaaacgtgctgagtacgctaaaacggttggttcaatcgtagtt	13	0	0	0	0	0	0	0	0	0	0	0	0	13	0	0	0	0	0	0	0	0	0	0	0	0	0	0	0	0	0	0	0	0	0	0	0	0
Bacillariophycidae	0.961039	MF000636	NA	NA	NA	Bacillariophyceae	no rank	['Campylodiscus sp. 3613.8', 'Cymatopleura solea', 'Entomoneis cf. alata', 'Petrodictyon gemma', 'Entomoneis sp.']	NA	33850	aaacatcactgctggtacaatggaagaagtttacaagcgtgctgagtacgctaagctagtaggttctatcgttgtt	12	0	0	0	0	0	0	0	0	0	0	0	0	0	0	0	0	0	0	0	0	0	0	0	0	0	0	0	0	0	0	0	0	0	0	12	0	0
Bacillariophycidae	0.921053	EF423502	NA	NA	NA	Bacillariophyceae	no rank	[]	NA	33850	aaacgttacagcttctactatggaagaagttattaaacgttgtgagtacgctaaagaagtagtttctatcgttgta	10	0	0	0	0	0	0	0	0	0	0	0	0	0	0	0	0	0	0	0	0	0	0	0	0	0	0	0	0	0	0	0	0	0	0	0	0	10
Bacillariophyta	0.921053	KJ577893	NA	NA	NA	NA	phylum	['Chaetoceros sp. 14BOF', 'Eucampia cornuta', 'Navicula sp. SZCZCH965', 'Cerataulina pelagica']	NA	2836	aaacgtaactgcagcgactatggaagaagtgtacaagcgtgctgactatgctaaagctgttggttctgttgtaatc	87156	174	163	391	373	98	110	373	1105	364	246	3141	1314	140	5126	2821	1973	2699	2893	1552	60	2492	2733	2406	1350	112	94	1384	26	4144	0	0	0	22571	14412	9982	334	0
Bacillariophyta	0.909091	KM084942	NA	NA	NA	NA	phylum	[]	NA	2836	taacgttactgcagctactatggaagacgtttacaaacgtgcagagtatgctaagcaagtcggttctatcattgta	51781	25	0	0	28	21	108	63	559	3349	0	265	91	747	283	289	23	651	1147	283	5803	2039	12751	3248	3465	811	0	1191	0	0	8599	0	53	341	0	0	5548	0
Bacillariophyta	0.907895	HQ912534	NA	NA	NA	NA	phylum	[]	NA	2836	taacgttactgcagctactatggaagacgtttacaaacgtgcagagtatgctaagcaagtcggttctatcattgtg	40865	0	0	325	0	16	0	0	251	0	0	0	0	0	0	124	0	278	0	0	0	0	28	0	2310	290	767	9121	0	0	25451	32	0	1872	0	0	0	0
Bacillariophyta	0.934211	KY320315	NA	NA	NA	NA	phylum	['Nitzschia sp. 1BOF', 'Cylindrotheca closterium', 'Cylindrotheca sp. 1BOF', 'Cylindrotheca sp. 2BOF', 'Hantzschia amphioxys', 'Plagiostriata baltica', 'Nitzschia liebethruthii', 'Bacillaria paxillifer']	NA	2836	aaacgtaacagctgcaacaatggaagaagtgtacaaacgtgctgagtacgctaaagaagttggttcaatcgtaatc	36532	565	155	104	1291	164	117	167	766	1207	251	527	145	7021	3930	114	21	776	636	3082	298	604	4773	160	0	9615	43	0	0	0	0	0	0	0	0	0	0	0
Bacillariophyta	0.934211	HE663062	NA	NA	NA	NA	phylum	[]	NA	2836	aaacattactgctggtacaatggaagacgtatacaaacgtgcagaatacgcgaaagctgtaggttctatcgttgta	33750	171	32	239	405	0	0	32	185	0	0	25	0	0	0	0	0	0	0	0	0	0	0	0	0	0	0	0	0	0	0	0	0	0	0	0	0	32661
Bacillariophyta	0.947368	KC985525	NA	NA	NA	NA	phylum	['Bacillaria paxillifer', 'Chaetoceros constrictus', 'Nitzschia liebethruthii']	NA	2836	aaacgttacagctgcaactatggaagaagtgtacaaacgtgctgagtacgctaaagaggttggttctgtagttatc	17586	0	0	0	0	0	0	0	0	0	0	0	0	0	0	0	0	0	0	0	0	0	17586	0	0	0	0	0	0	0	0	0	0	0	0	0	0	0
Bacillariophyta	0.947368	KC969715	NA	NA	NA	NA	phylum	['Nitzschia sp. 1BOF', 'Cylindrotheca sp.', 'Cylindrotheca closterium', 'Cylindrotheca sp. 1BOF', 'Cylindrotheca sp. 2BOF', 'Cylindrotheca sp. 3BOF', 'Cylindrotheca closterium lineage V', 'Nitzschia paleaeformis', 'Stephanopyxis palmeriana']	NA	2836	aaacgttacttctgctactatggaagaagtatacaaacgtgctgagtacgctaaagaagtaggttctatagttatc	17523	79	0	0	447	0	28	341	709	64	156	226	52	1054	603	4628	0	0	0	0	0	0	6577	0	0	0	0	0	0	0	0	0	0	2559	0	0	0	0
Bacillariophyta	0.960526	DQ514803	NA	NA	NA	NA	phylum	['Thalassiosira sp. 11BOF', 'Thalassiosira minuscula', 'Navicula radiosa', 'Thalassiosira nordenskioeldii', 'Thalassiosira sp. 1 SEH-2013', 'Hemiaulus sinensis', 'Thalassiosira angulata', 'Thalassiosira minima', 'Detonula pumila', 'Navicula capitatoradiata']	NA	2836	aaacattacagctgctacaatggaagaagtatacaaacgtgctgagtatgctaaagctatcggttctgtagttgtg	13164	0	0	0	0	0	0	0	0	0	0	0	0	0	0	0	0	0	0	0	0	0	0	0	0	0	0	0	0	0	0	0	0	0	0	0	0	13164
Bacillariophyta	0.907895	KJ577893	NA	NA	NA	NA	phylum	['Eucampia antarctica', 'Chaetoceros sp. 14BOF', 'Tryblionella apiculata', 'Navicula sp. SZCZCH965', 'Eucampia cornuta', 'Achnanthes sp. CCAP 1095/1', 'Cerataulina pelagica', 'Lauderia annulata']	NA	2836	aaacgtaactacagcgactatggaagaagtgtacaagcgtgctgactatgctaaagctgttggttctgttgtaatc	11352	0	0	0	0	0	0	0	0	0	0	0	0	0	0	0	0	0	0	0	0	0	11352	0	0	0	0	0	0	0	0	0	0	0	0	0	0	0
Bacillariophyta	0.907895	EF423500	NA	NA	NA	NA	phylum	[]	NA	2836	aaacgttacagctgctacaatggaagaagtttataaacgttgtgattatgcgagagaagtaggttctatcgttgtt	9355	0	0	0	0	0	0	0	0	0	0	0	0	0	0	0	0	0	0	0	0	0	0	0	0	0	0	0	4611	2170	0	25	0	80	2469	0	0	0
Bacillariophyta	0.947368	HQ912390	NA	NA	NA	NA	phylum	['Nitzschia sp. (in: Bacillariophyta)', 'Nitzschia sigma', 'Grammonema sp. NE-2015', 'Hantzschia amphioxys']	NA	2836	aaacgttacttctgctactatggaagaagtatacaaacgtgctgagtacgctaaagaagtaggttctgtagttatc	9191	0	0	0	0	0	65	0	0	0	0	0	0	12	0	34	0	0	0	0	0	0	0	0	0	0	0	0	0	0	0	0	0	9080	0	0	0	0
Bacillariophyta	0.947368	HQ912534	NA	NA	NA	NA	phylum	['Lithodesmium intricatum', 'Lithodesmium undulatum', 'Navicula sp.']	NA	2836	aaacgtcactgcagctactatggaagaagtttacaaacgtgcagagtatgctaaacaagtaggttcgatcattgtt	8710	0	0	0	0	0	0	0	0	0	0	0	0	0	0	0	0	0	0	0	0	0	8392	318	0	0	0	0	0	0	0	0	0	0	0	0	0	0
Bacillariophyta	0.922078	KM084942	NA	NA	NA	NA	phylum	[]	NA	2836	taacattactgcagctactatggaagacgtttacaaacgtgcagagtatgctaagcaagtcggttctatcattgta	8119	0	0	0	0	0	0	0	0	0	0	0	0	0	0	0	0	0	0	142	0	0	0	0	0	0	0	0	0	0	0	0	7443	534	0	0	0	0
Bacillariophyta	0.960526	AM710424	NA	NA	NA	NA	phylum	[]	NA	2836	aaacatcactgccggtacaatggaagaagtttacaaacgtgctgagtatgctaaagcagtaggttctatcgttgta	5813	0	0	0	0	0	0	0	0	0	0	0	0	0	0	0	0	0	0	0	0	0	0	0	0	0	0	0	0	0	0	0	0	5813	0	0	0	0
Bacillariophyta	0.947368	KF453990	NA	NA	NA	NA	phylum	['Thalassiosira nodulolineata', 'Asterionellopsis guyunusae']	NA	2836	aaacatcacagcagctactatggaagaagtttacaaacgtgctgagtacgctaagcaagttggttctgtagttgtt	5724	58	0	0	34	0	28	83	0	0	0	0	155	0	0	0	0	0	0	0	0	0	0	0	0	0	0	0	0	4591	0	0	0	0	775	0	0	0
Bacillariophyta	0.934211	KJ577893	NA	NA	NA	NA	phylum	['Chaetoceros sp. 14BOF', 'Eucampia cornuta', 'Cerataulina pelagica']	NA	2836	aaacgtaactgcagcgactatggaagaagtgtacaaacgtgctgactatgctaaagctgttggttctgttgtaatc	5666	0	0	0	0	0	0	0	0	0	0	0	0	0	0	0	0	0	0	0	0	0	0	0	0	0	5666	0	0	0	0	0	0	0	0	0	0	0
Bacillariophyta	0.922078	HE663062	NA	NA	NA	NA	phylum	[]	NA	2836	aaacatcacagcagctacaatggaagaagtttacaaacgtgcaaactacgctaaggctgttggttctatcgttgta	4758	0	0	0	0	0	0	0	0	0	0	0	0	0	0	0	0	0	0	1430	0	0	0	0	0	0	0	3328	0	0	0	0	0	0	0	0	0	0
Bacillariophyta	0.934211	HQ912390	NA	NA	NA	NA	phylum	['Cylindrotheca sp. 1BOF', 'Grammonema sp. NE-2015', 'Nitzschia sigma', 'Hantzschia elongata', 'Cylindrotheca sp. 2BOF', 'Hantzschia amphioxys', 'Nitzschia sp. (in: Bacillariophyta)', 'Bacillaria paxillifer']	NA	2836	gaacgttacagctgcaactatggaagaagtatataaacgtgctgagtacgctaaagaagtaggttctgtagttatt	4570	0	0	0	0	0	0	0	0	0	0	0	0	0	0	0	0	0	0	0	0	0	0	0	4570	0	0	0	0	0	0	0	0	0	0	0	0	0
Bacillariophyta	0.907895	JX971017	NA	NA	NA	NA	phylum	[]	NA	2836	aaacgttacagcggctactatggaaggcgtttaccaacgtgctgagtacgctaaagaagtaggttctattgttatc	3364	0	0	0	162	0	0	0	43	18	13	0	713	0	0	0	0	0	0	0	0	0	0	0	2415	0	0	0	0	0	0	0	0	0	0	0	0	0
Bacillariophyta	0.921053	KC985525	NA	NA	NA	NA	phylum	['Bacillaria paxillifer', 'Chaetoceros constrictus']	NA	2836	aaacgttacttcagctactatggaagaagtgtacaaacgtgcagagtacgctaaacaagttggttctgttgttatc	2927	0	0	0	0	0	0	0	0	0	0	0	0	0	0	0	0	0	0	0	0	0	0	0	2927	0	0	0	0	0	0	0	0	0	0	0	0	0
Bacillariophyta	0.909091	KM084942	NA	NA	NA	NA	phylum	[]	NA	2836	taacgttactgcagctactatggaagacgtttacaaacgtgcagagtatgctaagcaagttggttctatcattgta	2544	0	0	0	0	0	0	0	0	0	0	0	0	0	0	0	0	0	0	0	0	0	2544	0	0	0	0	0	0	0	0	0	0	0	0	0	0	0
Bacillariophyta	0.907895	KJ577893	NA	NA	NA	NA	phylum	['Eucampia antarctica', 'Chaetoceros sp. 14BOF', 'Tryblionella apiculata', 'Navicula sp. SZCZCH965', 'Eucampia cornuta', 'Achnanthes sp. CCAP 1095/1', 'Cerataulina pelagica', 'Lauderia annulata']	NA	2836	gaacgtaactgcagcgactatggaagaagtgtacaagcgtgctgactatgctaaagctgttggttctgttgtaatc	2441	0	0	0	0	0	0	0	0	0	0	0	0	0	0	2441	0	0	0	0	0	0	0	0	0	0	0	0	0	0	0	0	0	0	0	0	0	0
Bacillariophyta	0.921053	KY320315	NA	NA	NA	NA	phylum	['Nitzschia sp. 1BOF', 'Bacillaria paxillifer', 'Plagiostriata baltica', 'Cylindrotheca closterium', 'Cylindrotheca sp. 1BOF', 'Cylindrotheca sp. 2BOF', 'Cylindrotheca sp. 3BOF', 'Hantzschia amphioxys', 'Chaetoceros constrictus', 'Achnanthes sp.', 'Nitzschia liebethruthii', 'Bacillaria sp.']	NA	2836	aaacgtaacagctgcaacaatggaagaagtgcacaaacgtgctgagtacgctaaagaagttggttcaatcgtaatc	2064	0	0	0	0	0	0	0	0	0	0	0	0	0	0	0	0	0	0	0	0	0	0	0	0	2064	0	0	0	0	0	0	0	0	0	0	0	0
Bacillariophyta	0.960526	HQ912390	NA	NA	NA	NA	phylum	['Nitzschia sp. (in: Bacillariophyta)', 'Nitzschia sigma', 'Hantzschia amphioxys']	NA	2836	aaacgttacatctgcgactatggaagaagtatacaaacgtgctgagtatgctaaagaagtaggttctgtagttatc	1927	0	0	0	544	0	0	31	0	0	0	0	0	0	0	0	0	0	0	0	0	0	0	0	0	0	0	0	0	0	0	0	0	0	0	1352	0	0
Bacillariophyta	0.921053	MG968534	NA	NA	NA	NA	phylum	[]	NA	2836	aaacgttacggcagctacaatggaagaagtgtacaaacgtgcagagtacgctaaaactgttggttctgtcgttgtt	1560	0	0	0	0	0	0	0	0	0	0	0	0	0	0	0	0	0	0	0	0	0	0	0	0	0	0	0	0	0	0	1560	0	0	0	0	0	0
Bacillariophyta	0.907895	HQ912470	NA	NA	NA	NA	phylum	['Tabularia laevis', 'Halamphora parvipunctata', 'Aulacoseira subarctica', 'Aulacoseira distans', 'Nitzschia sp. (in: Bacillariophyta)', 'Aulacoseira granulata', 'Aulacoseira valida']	NA	2836	aaacattactgctgctacaatggacgaagttattaagcgtggtgaatacgctaaagctgtaggttctgtaattgta	1511	0	0	0	0	0	0	0	0	0	0	0	0	0	0	0	0	0	0	0	0	0	0	0	0	0	0	0	0	0	0	0	1511	0	0	0	0	0
Bacillariophyta	0.907895	JX970999	NA	NA	NA	NA	phylum	['Nitzschia sp. 1BOF', 'Cylindrotheca sp.', 'Cylindrotheca closterium', 'Cylindrotheca sp. 1BOF', 'Cylindrotheca sp. 2BOF', 'Cylindrotheca sp. 3BOF', 'Hantzschia amphioxys', 'Cylindrotheca closterium lineage V', 'Plagiostriata baltica', 'Cylindrotheca sp. lineage III', 'Cylindrotheca sp. lineage IV', 'Bacillaria paxillifer']	NA	2836	aaatgttactgccgcgacaatggaagaaatctacaaacgtgcagagtatgcaaaagaagtaggttctatcgttatc	1349	0	0	0	0	0	0	0	0	0	0	0	0	0	0	0	0	0	0	0	0	0	0	0	0	0	753	0	0	0	0	0	596	0	0	0	0	0
Bacillariophyta	0.947368	AY881967	NA	NA	NA	NA	phylum	['Nitzschia sp. 1BOF', 'Cylindrotheca sp.', 'Cylindrotheca closterium', 'Cylindrotheca sp. 1BOF', 'Cylindrotheca sp. 2BOF', 'Cylindrotheca sp. 3BOF', 'Cylindrotheca closterium lineage V', 'Nitzschia longissima', 'Nitzschia paleaeformis', 'Stephanopyxis palmeriana']	NA	2836	aaacgttactgctgctactatggaagaagtatacaaacgtgctgagtatgctaaagaagtaggttcaatcgttgta	1318	0	0	0	0	0	0	0	0	0	0	0	0	0	0	0	0	0	0	0	0	0	0	0	0	0	0	0	0	0	0	0	0	1318	0	0	0	0
Bacillariophyta	0.960526	KC969854	NA	NA	NA	NA	phylum	['Thalassiosira sp. 11BOF', 'Navicula capitatoradiata', 'Navicula radiosa', 'Thalassiosira angulata', 'Detonula pumila', 'Thalassiosira minuscula']	NA	2836	aaacgttactgcagctactatggaagaagtatacaaacgtgctgagtatgctaaagctattggttctgtagttgtt	1233	41	35	104	108	61	95	0	0	0	10	93	100	68	44	124	58	86	30	36	0	61	0	0	24	0	0	0	0	0	0	0	0	0	20	0	0	35
Bacillariophyta	0.921053	FJ002105	NA	NA	NA	NA	phylum	[]	NA	2836	aaacgtaactgctggtacaatggaagaagtgtacaaacgttctgagtatgctaaatcagttggttctgtagttatt	817	0	0	0	0	0	0	0	0	0	0	0	0	0	0	0	0	0	0	0	0	0	0	0	0	0	0	0	0	0	0	11	0	806	0	0	0	0
Bacillariophyta	0.909091	AB430695	NA	NA	NA	NA	phylum	['Navicula tripunctata', 'Lithodesmium undulatum', 'Navicula sp. SZCZCH703', 'Navicula lanceolata', 'Skeletonema sp.', 'Licmophora aff. ehrenbergii MPA-2015', 'Navicula sp. s0020', 'Lithodesmium intricatum', 'Navicula bottnica', 'Navicula sp.']	NA	2836	aaacatcacggcagctactatggaagaagtttacaagcgtgctgaatatgcaaaagctgttggttccatcattgtt	766	0	0	0	0	0	0	0	0	0	0	0	0	0	0	0	0	0	0	0	0	0	0	0	0	0	0	0	0	0	0	0	754	0	0	12	0	0
Bacillariophyta	0.947368	KC969715	NA	NA	NA	NA	phylum	['Nitzschia sp. 1BOF', 'Cylindrotheca sp.', 'Cylindrotheca closterium', 'Cylindrotheca sp. 1BOF', 'Cylindrotheca sp. 2BOF', 'Cylindrotheca sp. 3BOF', 'Cylindrotheca closterium lineage V', 'Nitzschia paleaeformis', 'Stephanopyxis palmeriana']	NA	2836	aaacgttactactgctactatggaagaagtatacaaacgtgctgagtacgctaaagaagtaggttctatagttatc	691	0	0	0	0	0	0	0	0	0	0	0	0	0	0	0	0	0	0	0	0	0	0	0	0	0	0	0	0	0	0	0	0	691	0	0	0	0
Bacillariophyta	0.907895	AM710458	NA	NA	NA	NA	phylum	[]	NA	2836	aaacatcaccggtggtacaatggaagatgtttatgctcgtgcagaatatgctaaatcagtaggttctatcgttgtt	688	0	0	0	0	0	0	0	0	0	0	0	0	688	0	0	0	0	0	0	0	0	0	0	0	0	0	0	0	0	0	0	0	0	0	0	0	0
Bacillariophyta	0.909091	KC309557	NA	NA	NA	NA	phylum	[]	NA	2836	aaacgttacctcagctactatggaagaagtttacaagcgtgcagaatatgctaagcaagtaggttctatcgttatc	635	0	0	0	0	0	0	0	0	0	0	0	0	635	0	0	0	0	0	0	0	0	0	0	0	0	0	0	0	0	0	0	0	0	0	0	0	0
Bacillariophyta	0.907895	KJ577893	NA	NA	NA	NA	phylum	['Eucampia antarctica', 'Chaetoceros sp. 14BOF', 'Tryblionella apiculata', 'Navicula sp. SZCZCH965', 'Eucampia cornuta', 'Achnanthes sp. CCAP 1095/1', 'Cerataulina pelagica', 'Lauderia annulata']	NA	2836	aaacgtgactgcagcgactatggaagaagtgtacaagcgtgctgactatgctaaagctgttggttctgttgtaatc	606	0	0	0	0	0	0	0	0	0	0	0	0	0	0	0	0	0	0	0	0	0	0	0	0	0	0	0	0	0	0	0	0	502	104	0	0	0
Bacillariophyta	0.934211	KY320315	NA	NA	NA	NA	phylum	['Nitzschia sp. 1BOF', 'Cylindrotheca closterium', 'Cylindrotheca sp. 1BOF', 'Cylindrotheca sp. 2BOF', 'Hantzschia amphioxys', 'Plagiostriata baltica', 'Nitzschia liebethruthii', 'Bacillaria paxillifer']	NA	2836	aaacgttacaggtgctactatggaagaagtgtacaaacgttctgagtacgctaaagaagtaggatctattgttatc	579	0	0	0	0	0	0	0	0	0	0	0	0	0	0	579	0	0	0	0	0	0	0	0	0	0	0	0	0	0	0	0	0	0	0	0	0	0
Bacillariophyta	0.934211	KY320315	NA	NA	NA	NA	phylum	['Nitzschia sp. 1BOF', 'Cylindrotheca closterium', 'Cylindrotheca sp. 1BOF', 'Cylindrotheca sp. 2BOF', 'Hantzschia amphioxys', 'Plagiostriata baltica', 'Nitzschia liebethruthii', 'Bacillaria paxillifer']	NA	2836	aaacgttacaggtgctactatggaagaagtgtacaaacgttctgagtgcgctaaagaagtaggttctattgttatc	554	0	0	0	0	0	0	0	0	0	0	554	0	0	0	0	0	0	0	0	0	0	0	0	0	0	0	0	0	0	0	0	0	0	0	0	0	0
Bacillariophyta	0.934211	KY320315	NA	NA	NA	NA	phylum	['Nitzschia sp. 1BOF', 'Cylindrotheca closterium', 'Cylindrotheca sp. 1BOF', 'Cylindrotheca sp. 2BOF', 'Hantzschia amphioxys', 'Plagiostriata baltica', 'Nitzschia liebethruthii', 'Bacillaria paxillifer']	NA	2836	aaacgttacaggtgctactatggaagaagtgtacaaacgttctgagtacgctaaaaaagtaggttctattgttatc	545	0	0	0	0	0	0	0	0	0	0	0	0	0	0	0	0	545	0	0	0	0	0	0	0	0	0	0	0	0	0	0	0	0	0	0	0	0
Bacillariophyta	0.934211	KC969715	NA	NA	NA	NA	phylum	['Nitzschia sp. 1BOF', 'Cylindrotheca sp.', 'Cylindrotheca closterium', 'Tryblionella apiculata', 'Cylindrotheca sp. 1BOF', 'Cylindrotheca sp. 2BOF', 'Cylindrotheca sp. 3BOF', 'Hantzschia amphioxys', 'Cylindrotheca closterium lineage V', 'Nitzschia paleaeformis', 'Bacillaria paxillifer', 'Stephanopyxis palmeriana']	NA	2836	aaacgttacttctgctactatggaggaagtatacaaacgtgctgagtacgctaaagaagtaggttctatagttatc	526	0	0	0	0	0	0	0	0	0	0	0	0	0	0	10	0	0	0	0	0	0	516	0	0	0	0	0	0	0	0	0	0	0	0	0	0	0
Bacillariophyta	0.921053	AY569592	NA	NA	NA	NA	phylum	['Aulacoseira subarctica', 'Nitzschia sigma', 'Craspedostauros alyoubii', 'Stauroneis constricta', 'Craspedostauros paradoxa', 'Nitzschia sp. (in: Bacillariophyta)', 'Aulacoseira granulata']	NA	2836	aaacgttactgctgccacaatggacgaagttattaaacgtgcagagtacgctaaagaagtaggttctgtaattatc	526	0	0	0	0	0	0	24	0	0	43	0	0	0	0	0	0	0	0	0	0	459	0	0	0	0	0	0	0	0	0	0	0	0	0	0	0	0
Bacillariophyta	0.907895	KY320315	NA	NA	NA	NA	phylum	[]	NA	2836	aaacgtaacagctgcaacaatggaagaagtgtataaatgtgctgagtacgctaaagaagttggttcaatcgtaatc	520	0	0	0	0	0	0	0	0	0	0	0	0	0	520	0	0	0	0	0	0	0	0	0	0	0	0	0	0	0	0	0	0	0	0	0	0	0
Bacillariophyta	0.907895	KX981826	NA	NA	NA	NA	phylum	['Cylindrotheca sp.', 'Cylindrotheca closterium', 'Bellerochea malleus', 'Plagiostriata goreensis', 'Cylindrotheca closterium lineage V', 'Plagiostriata baltica', 'Haslea nipkowii', 'Helicotheca tamesis']	NA	2836	aaacgtaactggcggtacaatggaagaagtgtacaaacgttcagagtacgctaaagcagtaggttctattgttatc	514	0	0	0	0	0	0	0	0	514	0	0	0	0	0	0	0	0	0	0	0	0	0	0	0	0	0	0	0	0	0	0	0	0	0	0	0	0
Bacillariophyta	0.934211	HQ912390	NA	NA	NA	NA	phylum	['Cylindrotheca sp. 1BOF', 'Grammonema sp. NE-2015', 'Nitzschia sigma', 'Hantzschia elongata', 'Cylindrotheca sp. 2BOF', 'Bacillaria sp.', 'Hantzschia amphioxys', 'Nitzschia sp. (in: Bacillariophyta)', 'Bacillaria paxillifer']	NA	2836	aaacgttacagctgcaacaatggaagaagtatacaaacgtgctgagtacgctaaagaagttggttctgtagtaatc	480	0	0	0	0	0	0	0	94	0	0	0	0	0	0	248	0	0	0	0	0	0	138	0	0	0	0	0	0	0	0	0	0	0	0	0	0	0
Bacillariophyta	0.921053	KY320315	NA	NA	NA	NA	phylum	['Nitzschia sp. 1BOF', 'Bacillaria paxillifer', 'Plagiostriata baltica', 'Cylindrotheca closterium', 'Cylindrotheca sp. 1BOF', 'Cylindrotheca sp. 2BOF', 'Cylindrotheca sp. 3BOF', 'Hantzschia amphioxys', 'Chaetoceros constrictus', 'Achnanthes sp.', 'Nitzschia liebethruthii', 'Bacillaria sp.']	NA	2836	aaacgttacaggtgttattatggaagaagtgtacaaacgttctgagtacgctaaagaagtaggttctattgttatc	455	0	0	0	455	0	0	0	0	0	0	0	0	0	0	0	0	0	0	0	0	0	0	0	0	0	0	0	0	0	0	0	0	0	0	0	0	0
Bacillariophyta	0.921053	KY320315	NA	NA	NA	NA	phylum	['Nitzschia sp. 1BOF', 'Bacillaria paxillifer', 'Plagiostriata baltica', 'Cylindrotheca closterium', 'Cylindrotheca sp. 1BOF', 'Cylindrotheca sp. 2BOF', 'Cylindrotheca sp. 3BOF', 'Hantzschia amphioxys', 'Chaetoceros constrictus', 'Achnanthes sp.', 'Nitzschia liebethruthii', 'Bacillaria sp.']	NA	2836	aaacgtaacagctgcaacaatggaagaagtgtacaaacgtgctgagtacgctaaagaagttgattcaatcgtaatc	407	0	0	0	0	0	0	0	0	0	0	0	0	0	0	0	0	40	0	0	0	0	0	0	0	0	0	367	0	0	0	0	0	0	0	0	0	0
Bacillariophyta	0.948052	MF000636	NA	NA	NA	NA	phylum	['Campylodiscus sp. 3613.8', 'Cymatopleura solea', 'Didymosphenia geminata', 'Entomoneis cf. alata', 'Petrodictyon gemma', 'Halamphora isumiensis', 'Thalassiophysa hyalina', 'Entomoneis sp.', 'Melosira sp. 2BOF']	NA	2836	aaacatcactgctggtacaatggaagaagtttacaagcgtgctgagtacgataagcaagtaggttctatcgttgtt	390	0	0	0	0	0	0	0	0	0	0	0	0	0	0	0	0	0	0	0	0	0	0	0	0	0	369	0	0	0	0	0	0	0	0	21	0	0
Bacillariophyta	0.973684	DQ514803	NA	NA	NA	NA	phylum	['Thalassiosira sp. 11BOF', 'Thalassiosira minuscula', 'Hemiaulus sinensis', 'Thalassiosira sp. 1 SEH-2013', 'Thalassiosira minima']	NA	2836	aaacattacagctgcgacaatggaagaagtatacaaacgtgctgagtatgctaaagctgttggttctgtaattgtt	375	0	0	30	0	0	0	0	0	0	0	0	0	0	0	0	15	13	0	25	0	0	0	0	0	270	0	22	0	0	0	0	0	0	0	0	0	0
Bacillariophyta	0.948052	KC969783	NA	NA	NA	NA	phylum	['Nitzschia sp. 1BOF', 'Cylindrotheca closterium', 'Cylindrotheca sp. 1BOF', 'Cylindrotheca sp. 2BOF', 'Cylindrotheca sp. 3BOF']	NA	2836	aaacgttacagcagctactatggaagaagtatacaaacgtgctgagtatgctaaagaagtagattctatcgttatc	372	0	0	0	372	0	0	0	0	0	0	0	0	0	0	0	0	0	0	0	0	0	0	0	0	0	0	0	0	0	0	0	0	0	0	0	0	0
Bacillariophyta	0.947368	DQ514795	NA	NA	NA	NA	phylum	[]	NA	2836	aaacgttacttctgctactatggaagaagtatacaaacgtgctgagtatgctaaagctattggttctgtagttgtt	358	0	0	0	10	0	0	0	0	0	0	18	0	42	20	241	0	0	0	0	0	11	16	0	0	0	0	0	0	0	0	0	0	0	0	0	0	0
Bacillariophyta	0.921053	KY320315	NA	NA	NA	NA	phylum	['Nitzschia sp. 1BOF', 'Bacillaria paxillifer', 'Plagiostriata baltica', 'Cylindrotheca closterium', 'Cylindrotheca sp. 1BOF', 'Cylindrotheca sp. 2BOF', 'Cylindrotheca sp. 3BOF', 'Hantzschia amphioxys', 'Chaetoceros constrictus', 'Achnanthes sp.', 'Nitzschia liebethruthii', 'Bacillaria sp.']	NA	2836	aaacgtaacagctgcaacaatggaagaagtgtataaacgtgctgagtacgctaaagaagttggttcaatcgtaatc	324	0	0	0	0	0	0	0	324	0	0	0	0	0	0	0	0	0	0	0	0	0	0	0	0	0	0	0	0	0	0	0	0	0	0	0	0	0
Bacillariophyta	0.960526	AF015569	NA	NA	NA	NA	phylum	['Thalassiosira decipiens', 'Gomphonema sp. 2LB', 'Thalassiosira antarctica', 'Skeletonema sp.', 'Skeletonema pseudocostatum', 'Thalassiosira angulata', 'Skeletonema costatum']	NA	2836	aaacattactgctgcgacaatggaagaagtatacaaacgtgctgagtatgctaaagccattggttctatcgttgtt	322	0	0	13	0	0	0	0	0	11	11	56	68	18	0	0	24	23	12	23	0	63	0	0	0	0	0	0	0	0	0	0	0	0	0	0	0	0
Bacillariophyta	0.948052	KC969783	NA	NA	NA	NA	phylum	['Nitzschia sp. 1BOF', 'Cylindrotheca closterium', 'Cylindrotheca sp. 1BOF', 'Cylindrotheca sp. 2BOF', 'Cylindrotheca sp. 3BOF']	NA	2836	aaacgttacagcagctactatggaagaagtatacaaacgtgctgagtatgctaaagaagtaggttatatcgttatc	293	0	0	0	293	0	0	0	0	0	0	0	0	0	0	0	0	0	0	0	0	0	0	0	0	0	0	0	0	0	0	0	0	0	0	0	0	0
Bacillariophyta	0.960526	DQ514798	NA	NA	NA	NA	phylum	['Thalassiosira sp. 11BOF', 'Navicula capitatoradiata', 'Navicula radiosa', 'Thalassiosira nordenskioeldii', 'Thalassiosira angulata', 'Detonula pumila', 'Thalassiosira minuscula']	NA	2836	aaacattactgcggctacaatggaagaggtatacaaacgtgctgagtatgctaaagctattggttctgtagttgtt	290	0	0	0	0	0	0	0	0	0	0	0	0	270	0	0	0	0	0	0	0	0	0	0	0	0	0	0	0	0	0	0	0	0	20	0	0	0
Bacillariophyta	0.921053	KJ577893	NA	NA	NA	NA	phylum	['Chaetoceros sp. 14BOF', 'Eucampia cornuta', 'Navicula sp. SZCZCH965', 'Cerataulina pelagica']	NA	2836	aaacgtaactgcagcgactatggaaaaaatatacaaacgtgctgactatgctaaagctgttggttctgttgtaatc	235	235	0	0	0	0	0	0	0	0	0	0	0	0	0	0	0	0	0	0	0	0	0	0	0	0	0	0	0	0	0	0	0	0	0	0	0	0
Bacillariophyta	0.907895	KJ577893	NA	NA	NA	NA	phylum	['Eucampia antarctica', 'Chaetoceros sp. 14BOF', 'Tryblionella apiculata', 'Navicula sp. SZCZCH965', 'Eucampia cornuta', 'Achnanthes sp. CCAP 1095/1', 'Cerataulina pelagica', 'Lauderia annulata']	NA	2836	aaacgtaactgcagcgactatggaagaagtgtacaagcgtgctgactatgttaaagctgttggttctgttgtaatc	228	0	0	0	0	0	0	0	0	44	0	0	0	0	0	0	0	184	0	0	0	0	0	0	0	0	0	0	0	0	0	0	0	0	0	0	0	0
Bacillariophyta	0.921053	KY320315	NA	NA	NA	NA	phylum	['Nitzschia sp. 1BOF', 'Bacillaria paxillifer', 'Plagiostriata baltica', 'Cylindrotheca closterium', 'Cylindrotheca sp. 1BOF', 'Cylindrotheca sp. 2BOF', 'Cylindrotheca sp. 3BOF', 'Hantzschia amphioxys', 'Chaetoceros constrictus', 'Achnanthes sp.', 'Nitzschia liebethruthii', 'Bacillaria sp.']	NA	2836	aaacgttacaggtgctactatggaagaagtgtacaaacgttctgagtacactaaagaaataggttctattgttatc	226	0	0	0	226	0	0	0	0	0	0	0	0	0	0	0	0	0	0	0	0	0	0	0	0	0	0	0	0	0	0	0	0	0	0	0	0	0
Bacillariophyta	0.907895	MG968534	NA	NA	NA	NA	phylum	[]	NA	2836	aaacgtgacggcagctacaatggaagaagtgtacaaacgtgcagagtacgctaaaactgttggttctgtcgttgtt	219	0	0	0	0	0	0	0	0	0	0	0	0	0	10	0	0	0	0	151	23	0	0	0	0	0	0	0	22	13	0	0	0	0	0	0	0	0
Bacillariophyta	0.973684	DQ514794	NA	NA	NA	NA	phylum	['Navicula tripunctata', 'Thalassiosira antarctica', 'Thalassiosira decipiens', 'Navicula lanceolata']	NA	2836	aaacatcacagcggctactatggaagaagtatacaaacgtgctgagtatgctaaagctattggttctatcgttgtt	218	0	0	15	10	0	0	0	12	0	0	13	19	33	0	18	13	0	0	35	0	50	0	0	0	0	0	0	0	0	0	0	0	0	0	0	0	0
Bacillariophyta	0.973684	DQ514795	NA	NA	NA	NA	phylum	['Navicula tripunctata', 'Thalassiosira antarctica', 'Navicula lanceolata', 'Thalassiosira angulata']	NA	2836	aaacatcacagctgctactatggaagaagtatacaaacgtgctgagtatgctaaagctattggttctatcgttgtt	201	0	0	19	0	0	0	0	0	0	0	32	29	35	19	25	0	0	0	20	0	22	0	0	0	0	0	0	0	0	0	0	0	0	0	0	0	0
Bacillariophyta	0.934211	KC969721	NA	NA	NA	NA	phylum	['Nitzschia sp. 1BOF', 'Cylindrotheca sp.', 'Cylindrotheca closterium', 'Tryblionella apiculata', 'Cylindrotheca sp. 1BOF', 'Cylindrotheca sp. 2BOF', 'Cylindrotheca sp. 3BOF', 'Hantzschia amphioxys', 'Cylindrotheca closterium lineage V', 'Bacillaria paxillifer', 'Stephanopyxis palmeriana']	NA	2836	aaacgttactgcagctactatggaagaaatctacaaacgttctgagtatgctaaagaaatcggttctatcgttatc	177	0	0	0	0	0	0	0	0	0	0	0	0	0	0	0	0	0	0	0	0	0	0	0	0	0	0	0	0	0	0	177	0	0	0	0	0	0
Bacillariophyta	0.921053	KY320315	NA	NA	NA	NA	phylum	['Nitzschia sp. 1BOF', 'Bacillaria paxillifer', 'Plagiostriata baltica', 'Cylindrotheca closterium', 'Cylindrotheca sp. 1BOF', 'Cylindrotheca sp. 2BOF', 'Cylindrotheca sp. 3BOF', 'Hantzschia amphioxys', 'Chaetoceros constrictus', 'Achnanthes sp.', 'Nitzschia liebethruthii', 'Bacillaria sp.']	NA	2836	aaacgtaatagctgcaacaatggaagaagtgtacaaacgtgctgagtacgctaaagaagttggttcaatcgtaatc	151	0	0	0	0	0	0	0	0	0	0	0	0	151	0	0	0	0	0	0	0	0	0	0	0	0	0	0	0	0	0	0	0	0	0	0	0	0
Bacillariophyta	0.960526	DQ514795	NA	NA	NA	NA	phylum	['Cyclostephanos dubius', 'Thalassiosira sp. 11BOF', 'Thalassiosira decipiens', 'Thalassiosira nodulolineata', 'Thalassiosira minuscula', 'Thalassiosira antarctica', 'Cyclostephanos invisitatus', 'Cyclostephanos tholiformis', 'Navicula lanceolata', 'Navicula tripunctata', 'Thalassiosira angulata']	NA	2836	aaacatcacagctgctactatggaagaagtatacaaacgtgctgagtatgctaaagccattggttctatcgttgtt	150	0	0	0	0	0	0	0	0	0	0	37	49	17	15	20	0	0	0	0	0	12	0	0	0	0	0	0	0	0	0	0	0	0	0	0	0	0
Bacillariophyta	0.947368	HQ912390	NA	NA	NA	NA	phylum	['Nitzschia sp. (in: Bacillariophyta)', 'Nitzschia sigma', 'Grammonema sp. NE-2015', 'Hantzschia amphioxys']	NA	2836	aaacgttacagctgcgactatggaagaagtatataaacgtgctgagtacgctaaagaagtaggttctgtagttatc	142	0	0	0	0	0	0	0	0	0	0	142	0	0	0	0	0	0	0	0	0	0	0	0	0	0	0	0	0	0	0	0	0	0	0	0	0	0
Bacillariophyta	0.960526	DQ514794	NA	NA	NA	NA	phylum	['Navicula tripunctata', 'Thalassiosira antarctica', 'Thalassiosira decipiens', 'Navicula lanceolata']	NA	2836	aaacatcacagcggctactatggaagaagtatacaaacgtgctgagtatgctaaagccattggttctatcgttgtt	141	0	0	10	0	0	0	14	0	0	0	21	27	31	0	0	0	0	0	11	0	27	0	0	0	0	0	0	0	0	0	0	0	0	0	0	0	0
Bacillariophyta	0.935065	AB831880	NA	NA	NA	NA	phylum	[]	NA	2836	aaacatcacagctgctactatggaagaagtatacaaacgtgctgagtacgctaaagaagttggttctgtaattatc	137	0	0	0	0	0	0	0	0	0	0	0	0	11	17	109	0	0	0	0	0	0	0	0	0	0	0	0	0	0	0	0	0	0	0	0	0	0
Bacillariophyta	0.922078	KM084942	NA	NA	NA	NA	phylum	[]	NA	2836	aaacgttactgcagctactatggaagacgtttacaaacgtgcagagtatgctaagcaagtcggttctatcattgta	125	0	0	0	0	0	0	0	0	21	0	0	0	0	0	10	0	11	0	0	0	19	22	28	0	14	0	0	0	0	0	0	0	0	0	0	0	0
Bacillariophyta	0.948052	MF000636	NA	NA	NA	NA	phylum	['Campylodiscus sp. 3613.8', 'Cymatopleura solea', 'Didymosphenia geminata', 'Entomoneis cf. alata', 'Petrodictyon gemma', 'Halamphora isumiensis', 'Thalassiophysa hyalina', 'Entomoneis sp.', 'Melosira sp. 2BOF']	NA	2836	aaacatcactgccggtacaatggaagaagtttacaagcgtgctgagtacgctaagcaagtaggttctatcgttgtt	122	0	0	0	0	0	0	0	0	0	0	0	0	0	0	0	0	0	0	0	0	0	0	0	0	0	13	0	18	0	0	0	0	0	28	40	0	23
Bacillariophyta	0.960526	HQ912488	NA	NA	NA	NA	phylum	['Dimeregramma sp. SZCZCH437', 'Thalassiosira minima', 'Halamphora sp. SZCZCH623', 'Skeletonema sp.', 'Leptocylindrus aporus', 'Licmophora aff. ehrenbergii MPA-2015', 'Hemiaulus sinensis', 'Guinardia striata', 'Thalassiosira minuscula']	NA	2836	aaacattactgctgcgacgatggaagaagtatacaaacgtgctgagtatgctaaagctgttggttctgtaattgtt	122	0	0	10	0	0	0	0	0	0	0	0	0	0	0	0	0	0	0	0	0	0	0	0	0	112	0	0	0	0	0	0	0	0	0	0	0	0
Bacillariophyta	0.921053	KY320336	NA	NA	NA	NA	phylum	[]	NA	2836	aaacatcacggcagctactatggaagaagtttacaaacgtgctgaatatgcaaaagccgttggttctattattgtt	115	0	0	0	0	0	0	0	0	0	0	115	0	0	0	0	0	0	0	0	0	0	0	0	0	0	0	0	0	0	0	0	0	0	0	0	0	0
Bacillariophyta	0.934211	KY320315	NA	NA	NA	NA	phylum	['Nitzschia sp. 1BOF', 'Cylindrotheca closterium', 'Cylindrotheca sp. 1BOF', 'Cylindrotheca sp. 2BOF', 'Hantzschia amphioxys', 'Plagiostriata baltica', 'Nitzschia liebethruthii', 'Bacillaria paxillifer']	NA	2836	aaacgttacaggtgctactatggaagaagtgtacaaatgttctgagtacgctaaagaagtaggttctattgttatc	112	0	0	0	0	0	0	0	112	0	0	0	0	0	0	0	0	0	0	0	0	0	0	0	0	0	0	0	0	0	0	0	0	0	0	0	0	0
Bacillariophyta	0.934211	KF453990	NA	NA	NA	NA	phylum	['Asterionellopsis tropicalis', 'Cyclostephanos invisitatus', 'Thalassiosira nodulolineata', 'Asterionellopsis guyunusae']	NA	2836	aaacatcacagcagctattatggaagaagtttacaaacgtgctgagtacgctaagcaagttggttctgtagttgtt	108	0	0	0	0	0	0	0	108	0	0	0	0	0	0	0	0	0	0	0	0	0	0	0	0	0	0	0	0	0	0	0	0	0	0	0	0	0
Bacillariophyta	0.907895	JX905667	NA	NA	NA	NA	phylum	[]	NA	2836	aaacgtcacagcagctacaatggaagaagtgtataaacgtgcagagtacgctaaaactgttggttctgtcgttgtt	105	0	0	0	0	0	105	0	0	0	0	0	0	0	0	0	0	0	0	0	0	0	0	0	0	0	0	0	0	0	0	0	0	0	0	0	0	0
Bacillariophyta	0.907895	JX970999	NA	NA	NA	NA	phylum	['Nitzschia sp. 1BOF', 'Cylindrotheca sp.', 'Cylindrotheca closterium', 'Cylindrotheca sp. 1BOF', 'Cylindrotheca sp. 2BOF', 'Cylindrotheca sp. 3BOF', 'Hantzschia amphioxys', 'Cylindrotheca closterium lineage V', 'Plagiostriata baltica', 'Cylindrotheca sp. lineage III', 'Cylindrotheca sp. lineage IV', 'Bacillaria paxillifer']	NA	2836	aaatgttactgccgcgacaatggaagaaatctacaaacgtgcaaagtatgcgaaagaagtaggttctatcgttatc	95	0	0	0	0	0	95	0	0	0	0	0	0	0	0	0	0	0	0	0	0	0	0	0	0	0	0	0	0	0	0	0	0	0	0	0	0	0
Bacillariophyta	0.960526	AF015569	NA	NA	NA	NA	phylum	['Thalassiosira decipiens', 'Gomphonema sp. 2LB', 'Thalassiosira antarctica', 'Skeletonema sp.', 'Skeletonema pseudocostatum', 'Thalassiosira angulata', 'Skeletonema costatum']	NA	2836	aaacattactgctgcgacgatggaagaagtatacaaacgtgctgagtatgctaaagctattggttctatcgttgtt	92	0	10	22	11	0	0	0	0	0	0	17	0	0	0	0	0	0	0	0	0	10	0	0	0	22	0	0	0	0	0	0	0	0	0	0	0	0
Bacillariophyta	0.960526	DQ514803	NA	NA	NA	NA	phylum	[]	NA	2836	aaacattacagctgcgacaatggaagaagtatacaaacgtgctgagtatgctaaagctgttggttctgtaattatt	91	0	0	0	0	0	0	0	0	0	0	0	0	0	0	0	0	0	0	0	0	0	0	0	0	53	0	0	0	0	0	38	0	0	0	0	0	0
Bacillariophyta	0.921053	HQ912534	NA	NA	NA	NA	phylum	['Lithodesmium undulatum', 'Navicula slesvicensis', 'Bellerochea malleus', 'Gyrosigma acuminatum', 'Navicula cf. duerrenbergiana', 'Gyrosigma sp. 1BOF', 'Neodelphineis sp. MPA-2015', 'Lithodesmium intricatum', 'Rhoicosigma sp.', 'Navicula sp.']	NA	2836	taacgttactgcagctactatggaagacgtttacaaacgtgcagagtatgctaagcaagtcggttctatcattgtt	89	0	0	0	0	0	0	0	0	10	0	0	0	0	0	0	0	0	0	0	0	11	14	25	13	0	0	0	0	0	16	0	0	0	0	0	0	0
Bacillariophyta	0.935065	KC969783	NA	NA	NA	NA	phylum	['Nitzschia sp. 1BOF', 'Cylindrotheca closterium', 'Cylindrotheca sp. 1BOF', 'Cylindrotheca sp. 2BOF', 'Cylindrotheca sp. 3BOF', 'Bacillaria paxillifer']	NA	2836	aaacgttacagcagctactatagaagaaatatacaaacgtgctgagtatgctaaagaagtaggttctatcgttatc	88	0	0	0	0	0	0	0	0	0	88	0	0	0	0	0	0	0	0	0	0	0	0	0	0	0	0	0	0	0	0	0	0	0	0	0	0	0
Bacillariophyta	0.907895	KJ577893	NA	NA	NA	NA	phylum	['Eucampia antarctica', 'Chaetoceros sp. 14BOF', 'Tryblionella apiculata', 'Navicula sp. SZCZCH965', 'Eucampia cornuta', 'Achnanthes sp. CCAP 1095/1', 'Cerataulina pelagica', 'Lauderia annulata']	NA	2836	aaacgtaactgcagcgactatggaaaaagtgtacaagcgtgctgactatgctaaagctgttggttctgttgtaatc	82	0	0	0	0	0	82	0	0	0	0	0	0	0	0	0	0	0	0	0	0	0	0	0	0	0	0	0	0	0	0	0	0	0	0	0	0	0
Bacillariophyta	0.947368	KY320319	NA	NA	NA	NA	phylum	['Nitzschia sigma', 'Hantzschia amphioxys', 'Nitzschia sp. (in: Bacillariophyta)', 'Grammonema sp. NE-2015', 'Nitzschia cf. paleacea']	NA	2836	aaacgttacttctgctactatggaagaagtatacaaacgtgctgagtacgctaaagaagtaggttctgtaattatc	81	0	0	0	0	0	0	0	0	0	0	0	34	0	0	47	0	0	0	0	0	0	0	0	0	0	0	0	0	0	0	0	0	0	0	0	0	0
Bacillariophyta	0.934211	AF015569	NA	NA	NA	NA	phylum	[]	NA	2836	aaacgttactgcagctactatggaagaagtatacaaacgtgctgagtatgctaaagccattggttctatcgttgtt	81	0	0	0	0	0	0	0	0	0	0	39	16	11	0	0	0	0	0	0	0	15	0	0	0	0	0	0	0	0	0	0	0	0	0	0	0	0
Bacillariophyta	0.947368	HQ912487	NA	NA	NA	NA	phylum	['Chaetoceros constrictus', 'Plagiogrammopsis vanheurckii']	NA	2836	aaacgtaacagctgcaacaatggaagaagtgtacaaacgtgctgagtacgctaaagaagttggttctgtagtcatc	80	0	0	0	0	0	0	0	0	0	0	0	0	0	0	0	0	0	0	0	13	0	0	0	25	0	0	0	0	0	0	0	0	0	15	27	0	0
Bacillariophyta	0.921053	KY320315	NA	NA	NA	NA	phylum	['Nitzschia sp. 1BOF', 'Bacillaria paxillifer', 'Plagiostriata baltica', 'Cylindrotheca closterium', 'Cylindrotheca sp. 1BOF', 'Cylindrotheca sp. 2BOF', 'Cylindrotheca sp. 3BOF', 'Hantzschia amphioxys', 'Chaetoceros constrictus', 'Achnanthes sp.', 'Nitzschia liebethruthii', 'Bacillaria sp.']	NA	2836	aaacgttacaggtgctactataaaagaagtgtacaaacgttctgagtacgctaaagaagtaggttctattgttatc	75	0	0	0	0	0	75	0	0	0	0	0	0	0	0	0	0	0	0	0	0	0	0	0	0	0	0	0	0	0	0	0	0	0	0	0	0	0
Bacillariophyta	0.921053	HE663062	NA	NA	NA	NA	phylum	[]	NA	2836	aaacattactgctggtacaatggaggacgtatacaaacgtgcagaatacgcgaaagctgtaggttctatcgttgta	74	0	0	26	0	0	0	0	0	0	0	0	0	0	0	0	0	0	0	0	0	0	0	0	0	0	0	0	0	0	0	0	0	0	0	0	0	48
Bacillariophyta	0.947368	KC985686	NA	NA	NA	NA	phylum	[]	NA	2836	aaacgttacagctgccactatggaagaagtatacaaacgtgctgagtatgctaaagccattggttctatcgttgtt	74	0	0	0	0	0	0	0	12	0	0	31	31	0	0	0	0	0	0	0	0	0	0	0	0	0	0	0	0	0	0	0	0	0	0	0	0	0
Bacillariophyta	0.907895	KJ577893	NA	NA	NA	NA	phylum	['Eucampia antarctica', 'Chaetoceros sp. 14BOF', 'Tryblionella apiculata', 'Navicula sp. SZCZCH965', 'Eucampia cornuta', 'Achnanthes sp. CCAP 1095/1', 'Cerataulina pelagica', 'Lauderia annulata']	NA	2836	aaacgtaactgcagcgactatggaagaagtgtacaagcgtgctgactatgctaaagctgttggttctgttgtaata	71	0	0	0	0	0	0	0	0	71	0	0	0	0	0	0	0	0	0	0	0	0	0	0	0	0	0	0	0	0	0	0	0	0	0	0	0	0
Bacillariophyta	0.948052	MF000636	NA	NA	NA	NA	phylum	['Campylodiscus sp. 3613.8', 'Cymatopleura solea', 'Didymosphenia geminata', 'Entomoneis cf. alata', 'Petrodictyon gemma', 'Halamphora isumiensis', 'Thalassiophysa hyalina', 'Entomoneis sp.', 'Melosira sp. 2BOF']	NA	2836	aaacatcactgctggtacaatggaagaagtttacaagcgtgctgagtacgctaagcaagtaggttccatcgttgtt	70	0	0	0	0	0	0	0	0	0	0	0	0	0	0	0	0	0	0	0	0	0	0	0	0	0	12	0	12	0	0	0	0	0	15	31	0	0
Bacillariophyta	0.948052	KC969783	NA	NA	NA	NA	phylum	['Nitzschia sp. 1BOF', 'Cylindrotheca closterium', 'Cylindrotheca sp. 1BOF', 'Cylindrotheca sp. 2BOF', 'Cylindrotheca sp. 3BOF']	NA	2836	aaacgttacagcagttactatggaagaagtatacaaacgtgctgagtatgctaaagaagtaggttctatcgttatc	70	0	0	0	0	0	0	0	0	0	0	0	0	0	0	0	0	0	0	0	0	0	0	0	0	0	0	0	0	0	70	0	0	0	0	0	0	0
Bacillariophyta	0.907895	KJ577893	NA	NA	NA	NA	phylum	['Eucampia antarctica', 'Chaetoceros sp. 14BOF', 'Tryblionella apiculata', 'Navicula sp. SZCZCH965', 'Eucampia cornuta', 'Achnanthes sp. CCAP 1095/1', 'Cerataulina pelagica', 'Lauderia annulata']	NA	2836	aaacgtaactgcagcgactatggaagaagtgtacaagcgtgctgactatgctaaagctgttggctctgttgtaatc	69	0	0	0	0	0	0	0	0	0	0	0	0	0	13	0	0	0	0	0	0	0	0	0	0	0	0	0	0	0	0	0	0	35	21	0	0	0
Bacillariophyta	0.934211	KC969783	NA	NA	NA	NA	phylum	['Nitzschia sp. 1BOF', 'Fragilariopsis kerguelensis', 'Cylindrotheca closterium', 'Tryblionella apiculata', 'Cylindrotheca sp. 1BOF', 'Cylindrotheca sp. 2BOF', 'Cylindrotheca sp. 3BOF', 'Hantzschia amphioxys', 'Plagiostriata baltica', 'Nitzschia liebethruthii', 'Bacillaria paxillifer']	NA	2836	aaacgttacaggtgctactatggaagaagtgtacaaacgttttgagtacgctaaagaagtaggttctattgttatc	66	0	0	0	0	0	0	0	0	0	0	0	0	0	0	66	0	0	0	0	0	0	0	0	0	0	0	0	0	0	0	0	0	0	0	0	0	0
Bacillariophyta	0.922078	AB831880	NA	NA	NA	NA	phylum	[]	NA	2836	aaacatcacagcggctactatggaagaagtatacaaacgtgctgagtacgctaaagaagttggttctgtaattatc	64	0	0	0	0	0	0	0	0	0	0	0	0	16	0	48	0	0	0	0	0	0	0	0	0	0	0	0	0	0	0	0	0	0	0	0	0	0
Bacillariophyta	0.907895	KJ577893	NA	NA	NA	NA	phylum	['Eucampia antarctica', 'Chaetoceros sp. 14BOF', 'Tryblionella apiculata', 'Navicula sp. SZCZCH965', 'Eucampia cornuta', 'Achnanthes sp. CCAP 1095/1', 'Cerataulina pelagica', 'Lauderia annulata']	NA	2836	aaacgtaactgcagcgactatggaagaagtgtataagcgtgctgactatgctaaagctgttggttctgttgtaatc	62	0	0	0	51	0	0	0	0	0	0	0	0	0	0	0	0	0	0	0	0	0	0	0	0	0	0	0	0	0	0	0	0	0	11	0	0	0
Bacillariophyta	0.909091	KJ577893	NA	NA	NA	NA	phylum	['Chaetoceros sp. 14BOF', 'Navicula sp. SZCZCH965', 'Eucampia cornuta', 'Achnanthes sp. CCAP 1095/1', 'Cerataulina pelagica', 'Lauderia annulata']	NA	2836	aaacgtaactgcagcgactatggaagaagtgtacaagcgtgctgactatgctaaagctgttagttctgttgtaatc	59	0	0	0	0	0	0	59	0	0	0	0	0	0	0	0	0	0	0	0	0	0	0	0	0	0	0	0	0	0	0	0	0	0	0	0	0	0
Bacillariophyta	0.921053	HE663062	NA	NA	NA	NA	phylum	[]	NA	2836	aaacattactgctgggacaatggaagacgtatacaaacgtgcagaatacgcgaaagctgtaggttctatcgttgta	59	0	0	0	0	0	59	0	0	0	0	0	0	0	0	0	0	0	0	0	0	0	0	0	0	0	0	0	0	0	0	0	0	0	0	0	0	0
Bacillariophyta	0.948052	KC969783	NA	NA	NA	NA	phylum	['Nitzschia sp. 1BOF', 'Cylindrotheca closterium', 'Cylindrotheca sp. 1BOF', 'Cylindrotheca sp. 2BOF', 'Cylindrotheca sp. 3BOF']	NA	2836	aaatgttacagcagctactatggaagaagtatacaaacgtgctgagtatgctaaagaagtaggttctatcgttatc	58	0	0	0	0	0	0	58	0	0	0	0	0	0	0	0	0	0	0	0	0	0	0	0	0	0	0	0	0	0	0	0	0	0	0	0	0	0
Bacillariophyta	0.922078	HE663062	NA	NA	NA	NA	phylum	[]	NA	2836	aaacattactgctggcacaatggaagacgtatacaaacgtgcagaatacgcgaaagctgtaggttctatcgttgta	55	0	0	0	0	0	0	0	0	0	0	0	0	0	0	0	0	0	0	0	0	0	0	0	0	0	0	0	0	0	0	0	0	0	0	0	0	55
Bacillariophyta	0.921053	KY320319	NA	NA	NA	NA	phylum	['Hantzschia amphioxys', 'Nitzschia cf. paleacea', 'Chaetoceros didymus']	NA	2836	aaacgttacttctgctactatggaagaagtatacaaacgtgctgagtacgctaaagaagttggttctgtagttgtt	54	0	0	0	0	0	0	0	0	0	0	0	0	0	0	54	0	0	0	0	0	0	0	0	0	0	0	0	0	0	0	0	0	0	0	0	0	0
Bacillariophyta	0.907895	KP125878	NA	NA	NA	NA	phylum	[]	NA	2836	taacgttactgcggctactatggaagacgtttacaaacgtgcagagtatgctaagcaagtcggttctatcattgtg	52	0	0	0	0	0	0	0	0	0	0	0	0	0	0	0	0	0	0	0	0	0	0	0	0	0	0	11	0	0	41	0	0	0	0	0	0	0
Bacillariophyta	0.921053	KY320315	NA	NA	NA	NA	phylum	['Nitzschia sp. 1BOF', 'Bacillaria paxillifer', 'Plagiostriata baltica', 'Cylindrotheca closterium', 'Cylindrotheca sp. 1BOF', 'Cylindrotheca sp. 2BOF', 'Cylindrotheca sp. 3BOF', 'Hantzschia amphioxys', 'Chaetoceros constrictus', 'Achnanthes sp.', 'Nitzschia liebethruthii', 'Bacillaria sp.']	NA	2836	aaacgtaacagctgcaacaatggaagaagtgtacaaacgcgctgagtacgctaaagaagttggttcaatcgtaatc	50	0	0	0	0	0	0	0	0	0	0	0	0	23	0	0	0	0	0	10	0	0	0	0	0	17	0	0	0	0	0	0	0	0	0	0	0	0
Bacillariophyta	0.907895	KC802088	NA	NA	NA	NA	phylum	[]	NA	2836	aaacgtaactgcagcgactatggaagaagtgtacaagcgtgctgactatgctaaagctattggttctgtagttgtt	49	0	0	0	0	0	0	0	0	0	0	0	0	0	0	0	14	15	0	0	0	10	0	10	0	0	0	0	0	0	0	0	0	0	0	0	0	0
Bacillariophyta	0.921053	KY320315	NA	NA	NA	NA	phylum	['Nitzschia sp. 1BOF', 'Bacillaria paxillifer', 'Plagiostriata baltica', 'Cylindrotheca closterium', 'Cylindrotheca sp. 1BOF', 'Cylindrotheca sp. 2BOF', 'Cylindrotheca sp. 3BOF', 'Hantzschia amphioxys', 'Chaetoceros constrictus', 'Achnanthes sp.', 'Nitzschia liebethruthii', 'Bacillaria sp.']	NA	2836	aaacgtaacagctgcaacaatggaagaggtgtacaaacgtgctgagtacgctaaagaagttggttcaatcgtaatc	48	0	0	0	0	0	16	0	0	0	0	0	0	10	0	0	0	0	0	0	0	0	0	0	0	22	0	0	0	0	0	0	0	0	0	0	0	0
Bacillariophyta	0.960526	DQ514798	NA	NA	NA	NA	phylum	[]	NA	2836	aaacatcactgcaggtacaatggaagaagtttacaaacgtgctgagtatgctaaagctattggttctgtagttgtt	47	0	0	14	0	0	0	0	0	0	0	0	0	0	0	0	10	11	0	0	0	0	0	12	0	0	0	0	0	0	0	0	0	0	0	0	0	0
Bacillariophyta	0.948052	KC969783	NA	NA	NA	NA	phylum	['Nitzschia sp. 1BOF', 'Cylindrotheca closterium', 'Cylindrotheca sp. 1BOF', 'Cylindrotheca sp. 2BOF', 'Cylindrotheca sp. 3BOF']	NA	2836	aaacgttacagcagctactatggaagaagtatacaaacgtgctgagtatgctaaggaagtaggttctatcgttatc	47	0	0	10	0	0	37	0	0	0	0	0	0	0	0	0	0	0	0	0	0	0	0	0	0	0	0	0	0	0	0	0	0	0	0	0	0	0
Bacillariophyta	0.922078	AM710487	NA	NA	NA	NA	phylum	[]	NA	2836	aaacatcactgctggtacaatggaagaagtgtacaaacgtgcgaactacgctaaatctgtaggttctgtagttgtt	46	0	0	0	0	0	0	46	0	0	0	0	0	0	0	0	0	0	0	0	0	0	0	0	0	0	0	0	0	0	0	0	0	0	0	0	0	0
Bacillariophyta	0.921053	HE663062	NA	NA	NA	NA	phylum	[]	NA	2836	aaacattactgctggtacaatggaagacgtatacaaacgtgcagaatacgcgaaagctgtaggttctatcgctgta	43	0	0	0	0	0	0	0	0	0	0	0	0	0	0	0	0	0	0	0	0	0	0	0	0	0	0	0	0	0	0	0	0	0	0	0	0	43
Bacillariophyta	0.921053	FJ002154	NA	NA	NA	NA	phylum	['Chaetoceros socialis']	NA	2836	aaatgtaactgcagcaacaatggaagaagtgtacaaacgctctgagtacgctaagcaagttggttctgtaattatc	42	0	0	0	0	0	0	0	0	0	0	0	0	0	0	0	0	0	0	0	0	0	0	0	0	0	0	0	0	0	0	0	0	0	0	0	0	42
Bacillariophyta	0.934211	KY320315	NA	NA	NA	NA	phylum	['Nitzschia sp. 1BOF', 'Cylindrotheca closterium', 'Cylindrotheca sp. 1BOF', 'Cylindrotheca sp. 2BOF', 'Hantzschia amphioxys', 'Plagiostriata baltica', 'Nitzschia liebethruthii', 'Bacillaria paxillifer']	NA	2836	aaacgttacaggtgctactatggaagaagtgtacaaacgttctgagtacgctgaagaagtaggttctattgttatc	41	0	0	0	0	41	0	0	0	0	0	0	0	0	0	0	0	0	0	0	0	0	0	0	0	0	0	0	0	0	0	0	0	0	0	0	0	0
Bacillariophyta	0.960526	DQ514803	NA	NA	NA	NA	phylum	['Thalassiosira sp. 11BOF', 'Thalassiosira minuscula', 'Navicula radiosa', 'Thalassiosira sp. 1 SEH-2013', 'Hemiaulus sinensis', 'Thalassiosira angulata', 'Thalassiosira minima', 'Detonula pumila', 'Navicula capitatoradiata']	NA	2836	aaacattactgctgcgacaatggaagaagtatacaaacgtgctgagtatgctaaagctattggttctgtaattatt	40	0	0	0	0	0	0	0	0	0	0	0	0	0	0	0	14	0	0	0	0	0	0	0	0	15	0	0	0	0	0	11	0	0	0	0	0	0
Bacillariophyta	0.934211	DQ514795	NA	NA	NA	NA	phylum	[]	NA	2836	aaacgttacttctgctactatggaagaagtatacaaacgtgctgagtacgctaaagctattggttctgtagttgtt	40	0	0	0	0	0	0	0	0	0	0	0	0	0	0	40	0	0	0	0	0	0	0	0	0	0	0	0	0	0	0	0	0	0	0	0	0	0
Bacillariophyta	0.934211	KY320315	NA	NA	NA	NA	phylum	['Nitzschia sp. 1BOF', 'Cylindrotheca closterium', 'Cylindrotheca sp. 1BOF', 'Cylindrotheca sp. 2BOF', 'Hantzschia amphioxys', 'Plagiostriata baltica', 'Nitzschia liebethruthii', 'Bacillaria paxillifer']	NA	2836	aaacgttacaggtactactatggaagaagtgtacaaacgttctgagtacgctaaagaagtaggttctattgttatc	40	0	0	0	0	0	0	0	0	0	0	0	0	0	40	0	0	0	0	0	0	0	0	0	0	0	0	0	0	0	0	0	0	0	0	0	0	0
Bacillariophyta	0.921053	KY320315	NA	NA	NA	NA	phylum	[]	NA	2836	aaacattacagctgcgacaatggaagaagtgtacaaacgtgctgagtacgctaaagaagttggttcaatcgtaatc	39	0	0	0	0	0	0	0	0	0	0	0	0	0	0	0	0	0	0	11	0	0	0	0	0	28	0	0	0	0	0	0	0	0	0	0	0	0
Bacillariophyta	0.947368	KC969715	NA	NA	NA	NA	phylum	['Nitzschia sp. 1BOF', 'Cylindrotheca sp.', 'Cylindrotheca closterium', 'Cylindrotheca sp. 1BOF', 'Cylindrotheca sp. 2BOF', 'Cylindrotheca sp. 3BOF', 'Cylindrotheca closterium lineage V', 'Nitzschia paleaeformis', 'Stephanopyxis palmeriana']	NA	2836	aaacattactgctgcgacaatggaagaagtatacaaacgtgctgagtatgctaaagaagtaggttctatcgttatc	37	0	0	16	0	0	0	0	0	0	0	10	11	0	0	0	0	0	0	0	0	0	0	0	0	0	0	0	0	0	0	0	0	0	0	0	0	0
Bacillariophyta	0.921053	KY320315	NA	NA	NA	NA	phylum	['Nitzschia sp. 1BOF', 'Bacillaria paxillifer', 'Plagiostriata baltica', 'Cylindrotheca closterium', 'Cylindrotheca sp. 1BOF', 'Cylindrotheca sp. 2BOF', 'Cylindrotheca sp. 3BOF', 'Hantzschia amphioxys', 'Chaetoceros constrictus', 'Achnanthes sp.', 'Nitzschia liebethruthii', 'Bacillaria sp.']	NA	2836	aaacgtaacagctgcaacaatggaagaagtgtacaaacgtgctgagtatgctaaagaagttggttcaatcgtaatc	37	0	0	0	24	13	0	0	0	0	0	0	0	0	0	0	0	0	0	0	0	0	0	0	0	0	0	0	0	0	0	0	0	0	0	0	0	0
Bacillariophyta	0.947368	AF015569	NA	NA	NA	NA	phylum	[]	NA	2836	aaacattactgctgcgacaatggaagaagtatacaagcgtgctgagtatgctaaagccattggttctatcgttgtt	37	0	0	0	0	0	0	0	0	0	0	12	14	0	0	0	0	0	0	0	0	11	0	0	0	0	0	0	0	0	0	0	0	0	0	0	0	0
Bacillariophyta	0.922078	KC309557	NA	NA	NA	NA	phylum	['Pleurosigma sp.', 'Navicula slesvicensis', 'Cylindrotheca sp.', 'Bellerochea malleus', 'Biddulphia alternans', 'Haslea feriarum', 'Plagiostriata baltica', 'Haslea nipkowii', 'Chaetoceros didymus', 'Biddulphia cf. reticulum MPA-2013', 'Navicula sp. C20', 'Helicotheca tamesis']	NA	2836	aaacgttacctcagctactatggaagaagtttacaagcgtgcagagtatgctaagcaagtaggttctatcgttatc	37	0	0	0	0	0	0	0	0	0	0	0	0	37	0	0	0	0	0	0	0	0	0	0	0	0	0	0	0	0	0	0	0	0	0	0	0	0
Bacillariophyta	0.960526	AB831880	NA	NA	NA	NA	phylum	['Cyclostephanos dubius', 'Thalassiosira nodulolineata', 'Thalassiosira minuscula', 'Thalassiosira antarctica', 'Cyclostephanos invisitatus', 'Cyclostephanos tholiformis', 'Discostella stelligera']	NA	2836	aaacatcacaacggctactatggaagaagtatacaaacgtgctgagtatgctaaagctattggttctgtaattgtt	37	0	0	0	0	37	0	0	0	0	0	0	0	0	0	0	0	0	0	0	0	0	0	0	0	0	0	0	0	0	0	0	0	0	0	0	0	0
Bacillariophyta	0.973684	DQ514798	NA	NA	NA	NA	phylum	['Berkeleya sp. 10SEH', 'Berkeleya sp. 5SEH']	NA	2836	aaacatcactgcaggtacaatggaagaagtatacaaacgtgctgagtatgctaaagctattggttctgtagttgtt	36	0	0	13	0	0	0	0	0	0	0	0	0	0	0	0	11	0	0	0	0	0	0	12	0	0	0	0	0	0	0	0	0	0	0	0	0	0
Bacillariophyta	0.947368	KC969715	NA	NA	NA	NA	phylum	['Nitzschia sp. 1BOF', 'Cylindrotheca sp.', 'Cylindrotheca closterium', 'Cylindrotheca sp. 1BOF', 'Cylindrotheca sp. 2BOF', 'Cylindrotheca sp. 3BOF', 'Cylindrotheca closterium lineage V', 'Nitzschia paleaeformis', 'Stephanopyxis palmeriana']	NA	2836	aaacgttacttctgttactatggaagaagtatacaaacgtgctgagtatgctaaagaagtaggttctatagttatc	36	0	0	0	0	0	0	0	0	0	36	0	0	0	0	0	0	0	0	0	0	0	0	0	0	0	0	0	0	0	0	0	0	0	0	0	0	0
Bacillariophyta	0.935897	KC969783	NA	NA	NA	NA	phylum	['Nitzschia sp. 1BOF', 'Cylindrotheca closterium', 'Cylindrotheca sp. 1BOF', 'Cylindrotheca sp. 2BOF', 'Cylindrotheca sp. 3BOF']	NA	2836	aaacgttacagcagctactatggaagaagtatacaaacgtgctgagtatgctaaagaagtaggttacatcgttatc	35	0	0	0	35	0	0	0	0	0	0	0	0	0	0	0	0	0	0	0	0	0	0	0	0	0	0	0	0	0	0	0	0	0	0	0	0	0
Bacillariophyta	0.935065	KC969783	NA	NA	NA	NA	phylum	['Nitzschia sp. 1BOF', 'Cylindrotheca closterium', 'Cylindrotheca sp. 1BOF', 'Cylindrotheca sp. 2BOF', 'Cylindrotheca sp. 3BOF', 'Bacillaria paxillifer']	NA	2836	aaacatcacagcggctactatggaagaagtatacaaacgtgctgagtatgctaaagaagtaggttctatcgttatc	34	0	0	11	0	0	0	0	0	0	0	0	13	0	0	10	0	0	0	0	0	0	0	0	0	0	0	0	0	0	0	0	0	0	0	0	0	0
Bacillariophyta	0.948052	MF000636	NA	NA	NA	NA	phylum	['Campylodiscus sp. 3613.8', 'Cymatopleura solea', 'Didymosphenia geminata', 'Entomoneis cf. alata', 'Petrodictyon gemma', 'Halamphora isumiensis', 'Thalassiophysa hyalina', 'Entomoneis sp.', 'Melosira sp. 2BOF']	NA	2836	aaacatcactgctggtacaatggaagaagtttacaagcgtgctgagtacgctaagcaagtaggttctatagttgtt	34	0	0	0	0	0	0	0	0	0	0	0	0	0	0	0	0	0	0	0	0	0	0	0	0	0	0	0	0	0	0	0	0	0	13	21	0	0
Bacillariophyta	0.948052	HG530054	NA	NA	NA	NA	phylum	['Gomphonema productum', 'Thalassiosira minuscula', 'Gomphonema carolinense', 'Berkeleya fennica', 'Achnanthidium reimeri', 'Cymbopleura inaequalis', 'Achnanthidium minutissimum']	NA	2836	aaacattactgctgcgacaatggaagaagtatacaaacgtgctgagtatgctaaagctgttggttctgtaattatt	34	0	0	0	0	0	0	0	0	0	0	0	0	0	0	0	0	0	0	0	0	0	0	0	0	15	0	0	0	0	0	19	0	0	0	0	0	0
Bacillariophyta	0.934211	KY320315	NA	NA	NA	NA	phylum	['Nitzschia sp. 1BOF', 'Cylindrotheca closterium', 'Cylindrotheca sp. 1BOF', 'Cylindrotheca sp. 2BOF', 'Hantzschia amphioxys', 'Plagiostriata baltica', 'Nitzschia liebethruthii', 'Bacillaria paxillifer']	NA	2836	aaacatcacagctgctactatggaagaagtatacaaacgtgctgagtacgctaaagaagtaggttctatagttatc	33	0	0	0	0	0	0	0	0	0	0	0	0	0	0	33	0	0	0	0	0	0	0	0	0	0	0	0	0	0	0	0	0	0	0	0	0	0
Bacillariophyta	0.960526	AB831880	NA	NA	NA	NA	phylum	['Cyclostephanos dubius', 'Thalassiosira nodulolineata', 'Thalassiosira minuscula', 'Thalassiosira antarctica', 'Cyclostephanos invisitatus', 'Cyclostephanos tholiformis', 'Discostella stelligera']	NA	2836	aaacatcacagctgctactatggaagaagtatacaaacgtgctgagtatgctaaagctattggttctgtaattatc	31	0	0	0	0	0	0	0	0	0	0	0	0	0	0	31	0	0	0	0	0	0	0	0	0	0	0	0	0	0	0	0	0	0	0	0	0	0
Bacillariophyta	0.947368	DQ514794	NA	NA	NA	NA	phylum	['Navicula tripunctata', 'Thalassiosira decipiens', 'Skeletonema costatum', 'Thalassiosira antarctica', 'Navicula lanceolata', 'Parlibellus delognei', 'Skeletonema pseudocostatum', 'Thalassiosira angulata', 'Navicula bottnica', 'Berkeleya sp. 10SEH']	NA	2836	aaacatcacagcggctactatggaagaagtatacaagcgtgctgagtatgctaaagccattggttctatcgttgtt	31	0	0	0	0	0	0	0	0	0	0	0	11	10	0	0	0	0	0	0	0	10	0	0	0	0	0	0	0	0	0	0	0	0	0	0	0	0
Bacillariophyta	0.947368	KC985525	NA	NA	NA	NA	phylum	['Bacillaria paxillifer', 'Chaetoceros constrictus', 'Nitzschia liebethruthii']	NA	2836	aaacgtaacagctgcaacaatggaagaagtgtacaaacgtgctgagtacgctaaagaagtaggttctgtagttatc	31	0	0	0	0	0	0	0	0	0	0	0	0	15	0	0	0	0	0	0	0	0	0	0	0	16	0	0	0	0	0	0	0	0	0	0	0	0
Bacillariophyta	0.907895	KJ577893	NA	NA	NA	NA	phylum	['Eucampia antarctica', 'Chaetoceros sp. 14BOF', 'Tryblionella apiculata', 'Navicula sp. SZCZCH965', 'Eucampia cornuta', 'Achnanthes sp. CCAP 1095/1', 'Cerataulina pelagica', 'Lauderia annulata']	NA	2836	aaacgtaattgcagcgactatggaagaagtgtacaagcgtgctgactatgctaaagctgttggttctgttgtaatc	30	0	0	0	0	0	0	0	0	0	0	0	0	0	0	0	0	0	0	0	0	0	0	0	0	0	0	0	0	0	0	0	0	0	30	0	0	0
Bacillariophyta	0.934211	KY320319	NA	NA	NA	NA	phylum	['Opephora sp. ECT3831-Opep', 'Asteroplanus karianus', 'Nitzschia sigma', 'Hantzschia elongata', 'Hantzschia amphioxys', 'Nitzschia sp. (in: Bacillariophyta)', 'Grammonema sp. NE-2015', 'Nitzschia cf. paleacea']	NA	2836	aaacgttacttctgctactatggaagaagtatacaaacgtgctgagtacgctaaagaagttggttctgtagtcatc	30	0	0	0	0	0	0	0	0	0	0	0	0	0	0	30	0	0	0	0	0	0	0	0	0	0	0	0	0	0	0	0	0	0	0	0	0	0
Bacillariophyta	0.907895	KY320315	NA	NA	NA	NA	phylum	[]	NA	2836	aaacgtaatagctgtaacaatggaagaagtgtacaaacgtgctgagtacgctaaagaagttggttcaatcgtaatc	29	0	0	0	0	0	0	0	0	0	0	29	0	0	0	0	0	0	0	0	0	0	0	0	0	0	0	0	0	0	0	0	0	0	0	0	0	0
Bacillariophyta	0.921053	FJ002154	NA	NA	NA	NA	phylum	['Chaetoceros socialis']	NA	2836	aaacgtaactgctactacaatggaagaagtttacaaacgttctgagtatactaaacaagttggttcagtaattatc	29	0	0	0	0	0	0	0	0	0	0	0	29	0	0	0	0	0	0	0	0	0	0	0	0	0	0	0	0	0	0	0	0	0	0	0	0	0
Bacillariophyta	0.948052	KC969854	NA	NA	NA	NA	phylum	['Thalassiosira sp. 11BOF', 'Navicula capitatoradiata', 'Navicula radiosa', 'Thalassiosira angulata', 'Detonula pumila', 'Thalassiosira minuscula']	NA	2836	aaacgttacagctagtacgatggaagaagtatacaaacgtgctgagtatgctaaagctattggttctgtagttgtt	28	0	0	0	0	0	0	0	0	0	0	0	0	28	0	0	0	0	0	0	0	0	0	0	0	0	0	0	0	0	0	0	0	0	0	0	0	0
Bacillariophyta	0.935065	KC969783	NA	NA	NA	NA	phylum	['Nitzschia sp. 1BOF', 'Cylindrotheca closterium', 'Cylindrotheca sp. 1BOF', 'Cylindrotheca sp. 2BOF', 'Cylindrotheca sp. 3BOF', 'Bacillaria paxillifer']	NA	2836	aaacattacagctgcgacaatggaagaagtatacaaacgtgctgagtatgctaaagaagtaggttctatcgttatc	28	0	0	28	0	0	0	0	0	0	0	0	0	0	0	0	0	0	0	0	0	0	0	0	0	0	0	0	0	0	0	0	0	0	0	0	0	0
Bacillariophyta	0.921053	KY320315	NA	NA	NA	NA	phylum	['Nitzschia sp. 1BOF', 'Bacillaria paxillifer', 'Plagiostriata baltica', 'Cylindrotheca closterium', 'Cylindrotheca sp. 1BOF', 'Cylindrotheca sp. 2BOF', 'Cylindrotheca sp. 3BOF', 'Hantzschia amphioxys', 'Chaetoceros constrictus', 'Achnanthes sp.', 'Nitzschia liebethruthii', 'Bacillaria sp.']	NA	2836	aaacgtaacagctgcaacaatggaagaagtgtacaaacgtgctgagtacgccaaagaagttggttcaatcgtaatc	26	0	0	0	0	0	0	0	0	0	0	0	0	0	0	0	0	0	0	0	0	0	0	26	0	0	0	0	0	0	0	0	0	0	0	0	0	0
Bacillariophyta	0.948052	HQ912399	NA	NA	NA	NA	phylum	['Entomoneis sp.', 'Campylodiscus sp. 3613.8', 'Cymatopleura solea', 'Entomoneis cf. alata', 'Didymosphenia geminata', 'Petrodictyon gemma', 'Halamphora isumiensis', 'Thalassiophysa hyalina', 'Campylodiscus impressus', 'Campylodiscus samoensis', 'Melosira sp. 2BOF']	NA	2836	aaacatcactgcaggtacaatggaagaagtttacaagcgtgctgagtacgctaagcaagtaggttctatcgttgtt	26	0	0	0	0	0	0	0	0	0	0	0	0	0	0	0	0	0	0	0	0	0	0	0	0	0	0	0	0	0	0	0	0	0	0	26	0	0
Bacillariophyta	0.934211	KC985525	NA	NA	NA	NA	phylum	['Nitzschia sp. 1BOF', 'Cylindrotheca closterium', 'Cylindrotheca sp. 1BOF', 'Cylindrotheca sp. 2BOF', 'Hantzschia amphioxys', 'Chaetoceros constrictus', 'Plagiostriata baltica', 'Nitzschia liebethruthii', 'Bacillaria paxillifer']	NA	2836	aaacgttacagctgcaactatggaagaagtgtacaaacgtgctgagtacgctaaagaggttggttctgtagttacc	26	0	0	0	0	0	0	0	0	0	0	0	0	0	0	0	0	0	0	0	0	0	26	0	0	0	0	0	0	0	0	0	0	0	0	0	0	0
Bacillariophyta	0.907895	AY881967	NA	NA	NA	NA	phylum	[]	NA	2836	aaacattacagctgcgacaatggaagaagtatacaaacgtgctgagtacgctaaagaagttggttcaatcgtaatc	25	0	0	0	0	0	0	0	0	0	0	0	0	0	0	0	0	0	0	0	0	0	0	0	0	25	0	0	0	0	0	0	0	0	0	0	0	0
Bacillariophyta	0.921053	JX971017	NA	NA	NA	NA	phylum	[]	NA	2836	aaacatcacagcggctactatggaagaagtatacaaacgtgctgagtacgctaaagaagtaggttctatagttatc	25	0	0	0	0	0	0	0	0	0	0	0	0	0	0	25	0	0	0	0	0	0	0	0	0	0	0	0	0	0	0	0	0	0	0	0	0	0
Bacillariophyta	0.907895	KT943673	NA	NA	NA	NA	phylum	[]	NA	2836	aaacattactgctgcgacaatggaagaagtgtacaaacgtgctgagtacgctaaagaagttggttcaatcgtaatc	24	0	0	0	0	0	0	0	0	0	0	0	0	0	0	0	0	0	0	12	0	0	0	0	0	12	0	0	0	0	0	0	0	0	0	0	0	0
Bacillariophyta	0.960526	KC969854	NA	NA	NA	NA	phylum	['Thalassiosira sp. 11BOF', 'Navicula capitatoradiata', 'Navicula radiosa', 'Thalassiosira angulata', 'Detonula pumila', 'Thalassiosira minuscula']	NA	2836	aaacgtgacagcagctacaatggaagaagtgtacaaacgtgctgagtatgctaaagctattggttctgtagttgtt	23	0	0	0	0	0	0	0	0	0	0	0	0	0	0	0	0	12	0	0	0	11	0	0	0	0	0	0	0	0	0	0	0	0	0	0	0	0
Bacillariophyta	0.921053	HE663062	NA	NA	NA	NA	phylum	[]	NA	2836	aaacattactgctggtacaatggaagacgtatacaaacgtgcagaatacgcgaaagctgtagattctatcgttgta	23	0	0	0	0	0	12	0	0	0	0	0	0	0	0	0	0	0	0	0	0	0	0	0	0	0	0	0	0	0	0	0	0	0	0	0	0	11
Bacillariophyta	0.947368	AF015569	NA	NA	NA	NA	phylum	[]	NA	2836	aaacattactgctgcgacgatggaagaagtatacaaacgtgctgagtatgctaaagccattggttctatcgttgtt	22	0	0	10	0	0	0	0	0	0	0	0	0	12	0	0	0	0	0	0	0	0	0	0	0	0	0	0	0	0	0	0	0	0	0	0	0	0
Bacillariophyta	0.934211	HQ912464	NA	NA	NA	NA	phylum	['Opephora sp. ECT3831-Opep', 'Asteroplanus karianus', 'Tryblionella apiculata', 'Nitzschia sigma', 'Hantzschia elongata', 'Nitzschia lorenziana', 'Hantzschia amphioxys', 'Nitzschia sp. (in: Bacillariophyta)', 'Grammonema sp. NE-2015']	NA	2836	aaacgttacagcggctactatggaagaagtttacaaacgttctgagtatgctaaagaaatcggttctgtaatcatc	22	0	0	0	0	22	0	0	0	0	0	0	0	0	0	0	0	0	0	0	0	0	0	0	0	0	0	0	0	0	0	0	0	0	0	0	0	0
Bacillariophyta	0.973684	HQ912488	NA	NA	NA	NA	phylum	['Hemiaulus sinensis', 'Thalassiosira minima']	NA	2836	aaacgttacagctgccactatggaagaagtatacaaacgtgctgagtatgctaaagctgttggttctgtaattgtt	21	0	0	0	0	0	0	0	0	0	0	0	0	0	0	0	0	0	0	0	0	0	0	0	0	21	0	0	0	0	0	0	0	0	0	0	0	0
Bacillariophyta	0.947368	AB831880	NA	NA	NA	NA	phylum	[]	NA	2836	aaacatcacagcggctactatggaagaagtatacaaacgtgctgagtatgctaaagctattggttctgtaattatc	21	0	0	0	0	0	0	0	0	0	0	0	0	0	0	21	0	0	0	0	0	0	0	0	0	0	0	0	0	0	0	0	0	0	0	0	0	0
Bacillariophyta	0.934211	AY881967	NA	NA	NA	NA	phylum	[]	NA	2836	aaacattacagctgcgacaatggaagaagtatacaaacgtgctgagtatgctaaagaaataggttctatcgttgtt	21	0	0	0	0	0	0	0	0	0	0	0	0	0	0	11	0	0	0	0	0	0	0	0	0	10	0	0	0	0	0	0	0	0	0	0	0	0
Bacillariophyta	0.907895	KJ577893	NA	NA	NA	NA	phylum	['Eucampia antarctica', 'Chaetoceros sp. 14BOF', 'Tryblionella apiculata', 'Navicula sp. SZCZCH965', 'Eucampia cornuta', 'Achnanthes sp. CCAP 1095/1', 'Cerataulina pelagica', 'Lauderia annulata']	NA	2836	aaacgtaactgcagcgactatggaagaagtgtacaagcgtgctgactatgctaaagctgttggttctgttgtaatt	20	0	0	0	0	0	0	0	0	0	0	0	0	0	0	0	0	0	0	0	0	0	20	0	0	0	0	0	0	0	0	0	0	0	0	0	0	0
Bacillariophyta	0.922078	KJ011811	NA	NA	NA	NA	phylum	[]	NA	2836	aaacattactgctggtacaatggaagacgtatacaaacgtgcagaatacgcgaaagctgtaggttctatagttgta	20	0	0	0	0	0	0	0	0	0	0	0	0	0	0	0	0	0	0	0	0	0	0	0	0	0	0	0	0	0	0	0	0	0	0	0	0	20
Bacillariophyta	0.947368	DQ514803	NA	NA	NA	NA	phylum	[]	NA	2836	aaacattactgctgcgacaatggaagaagtatacaaacgtgctgagtatgctaaagctcttggttctgtaattatt	20	0	0	0	0	0	0	0	0	0	0	0	0	0	0	0	20	0	0	0	0	0	0	0	0	0	0	0	0	0	0	0	0	0	0	0	0	0
Bacillariophyta	0.934211	KY320315	NA	NA	NA	NA	phylum	['Nitzschia sp. 1BOF', 'Bacillaria paxillifer', 'Cylindrotheca closterium', 'Nitzschia liebethruthii', 'Cylindrotheca sp. 1BOF', 'Cylindrotheca sp. 2BOF', 'Didymosphenia geminata', 'Skeletonema sp.', 'Halamphora sp. SZCZCH975', 'Plagiostriata baltica', 'Hantzschia amphioxys', 'Nitzschia sp. (in: Bacillariophyta)', 'Bacillaria sp.']	NA	2836	aaacattacagctgcaacaatggaagaagtgtacaaacgtgctgagtacgctaaagaagttggttcaatcgtaatc	20	0	0	0	0	0	0	0	0	0	0	0	0	0	0	0	0	0	0	0	0	0	0	0	0	20	0	0	0	0	0	0	0	0	0	0	0	0
Bacillariophyta	0.921053	KJ577893	NA	NA	NA	NA	phylum	['Chaetoceros sp. 14BOF', 'Eucampia cornuta', 'Navicula sp. SZCZCH965', 'Cerataulina pelagica']	NA	2836	aaacgtaactgcagcgactatggaagaagtgtacaaacgtgctgactatgctaaagctgttggttctgttgtaacc	20	0	0	0	0	0	0	0	0	0	0	0	0	0	0	0	0	0	0	0	0	0	0	0	0	0	20	0	0	0	0	0	0	0	0	0	0	0
Bacillariophyta	0.907895	KY320315	NA	NA	NA	NA	phylum	[]	NA	2836	aaacgtaacagctgcaacaataaaagaagtgtacaaacgtgctgagtacgctaaagaagttggttcaatcgtaatc	20	0	0	0	0	0	0	0	0	0	0	0	0	0	20	0	0	0	0	0	0	0	0	0	0	0	0	0	0	0	0	0	0	0	0	0	0	0
Bacillariophyta	0.921053	HE663062	NA	NA	NA	NA	phylum	[]	NA	2836	aaacattactgctggtacgatggaagacgtatacaaacgtgcagaatacgcgaaagctgtaggttctatcgttgta	19	0	0	0	0	0	0	0	0	0	0	0	0	0	0	0	0	0	0	0	0	0	0	0	0	0	0	0	0	0	0	0	0	0	0	0	0	19
Bacillariophyta	0.934211	DQ514808	NA	NA	NA	NA	phylum	[]	NA	2836	aaacattactgctgcgacaatggaagaagtatacaaacgtgctgagtatgctaaagctattggttctgttgtaatc	19	0	0	0	0	0	0	0	0	0	0	0	0	0	0	0	19	0	0	0	0	0	0	0	0	0	0	0	0	0	0	0	0	0	0	0	0	0
Bacillariophyta	0.948052	KC969783	NA	NA	NA	NA	phylum	['Nitzschia sp. 1BOF', 'Cylindrotheca closterium', 'Cylindrotheca sp. 1BOF', 'Cylindrotheca sp. 2BOF', 'Cylindrotheca sp. 3BOF']	NA	2836	aaacatcacagctgctactatggaagaagtatacaaacgtgctgagtatgctaaagaagtaggttctatcgttatc	19	0	0	0	0	0	0	0	0	0	0	0	0	0	0	19	0	0	0	0	0	0	0	0	0	0	0	0	0	0	0	0	0	0	0	0	0	0
Bacillariophyta	0.921053	KJ577893	NA	NA	NA	NA	phylum	['Chaetoceros sp. 14BOF', 'Eucampia cornuta', 'Navicula sp. SZCZCH965', 'Cerataulina pelagica']	NA	2836	aaacgtaactgcagcgactatggaagaagtgtacaaacgtgctgactgtgctaaagctgttggttctgttgtaatc	19	0	0	0	0	0	0	0	0	0	0	0	0	0	0	0	0	0	0	0	0	0	0	0	0	0	19	0	0	0	0	0	0	0	0	0	0	0
Bacillariophyta	0.960526	KC969854	NA	NA	NA	NA	phylum	['Thalassiosira sp. 11BOF', 'Navicula capitatoradiata', 'Navicula radiosa', 'Thalassiosira angulata', 'Detonula pumila', 'Thalassiosira minuscula']	NA	2836	aaacgtgacagcagttacaatggaagaagtatacaaacgtgctgagtatgctaaagctattggttctgtagttgtt	19	0	0	0	0	0	0	0	0	0	0	0	0	0	0	0	0	0	0	19	0	0	0	0	0	0	0	0	0	0	0	0	0	0	0	0	0	0
Bacillariophyta	0.907895	KJ577893	NA	NA	NA	NA	phylum	['Eucampia antarctica', 'Chaetoceros sp. 14BOF', 'Tryblionella apiculata', 'Navicula sp. SZCZCH965', 'Eucampia cornuta', 'Achnanthes sp. CCAP 1095/1', 'Cerataulina pelagica', 'Lauderia annulata']	NA	2836	aaacgtaacagcagcgactatggaagaagtgtacaagcgtgctgactatgctaaagctgttggttctgttgtaatc	18	0	0	0	0	0	0	0	0	0	0	0	0	0	0	0	0	0	0	0	0	0	0	0	0	0	0	0	0	0	0	0	0	18	0	0	0	0
Bacillariophyta	0.947368	KC969715	NA	NA	NA	NA	phylum	['Nitzschia sp. 1BOF', 'Cylindrotheca sp.', 'Cylindrotheca closterium', 'Cylindrotheca sp. 1BOF', 'Cylindrotheca sp. 2BOF', 'Cylindrotheca sp. 3BOF', 'Cylindrotheca closterium lineage V', 'Nitzschia paleaeformis', 'Stephanopyxis palmeriana']	NA	2836	aaacgttactgcagctactatggaagaagtatacaaacgtgctgagtacgctaaagaagtaggttctatagttatc	18	0	0	0	0	0	0	0	0	0	0	0	0	0	0	18	0	0	0	0	0	0	0	0	0	0	0	0	0	0	0	0	0	0	0	0	0	0
Bacillariophyta	0.960526	AB831880	NA	NA	NA	NA	phylum	['Cyclostephanos dubius', 'Thalassiosira nodulolineata', 'Thalassiosira minuscula', 'Thalassiosira antarctica', 'Cyclostephanos invisitatus', 'Cyclostephanos tholiformis', 'Discostella stelligera']	NA	2836	aaacatcacagcggctactatggaagaagtatacaaacgtgctgagtatgctaaagctattgattctgtaattgtt	18	0	0	0	18	0	0	0	0	0	0	0	0	0	0	0	0	0	0	0	0	0	0	0	0	0	0	0	0	0	0	0	0	0	0	0	0	0
Bacillariophyta	0.921053	HQ912534	NA	NA	NA	NA	phylum	[]	NA	2836	taacgttactgcagctactatggaagacgtttacaaacgtgcagagtatgctaaacaagtcggttctatcattgtg	17	0	0	0	0	0	0	0	0	0	0	0	0	0	0	0	0	0	0	0	0	0	0	0	0	0	0	0	0	0	17	0	0	0	0	0	0	0
Bacillariophyta	0.947368	AM710432	NA	NA	NA	NA	phylum	['Pleurosigma sp.', 'Opephora sp. ECT3831-Opep', 'Hippodonta capitata', 'Nitzschia sigma', 'Haslea crucigera', 'Haslea nipkowii']	NA	2836	aaacgttacttctgctactatggaagaagtttacaaacgttcagaatatgctaaagcagtaggttctgtaattatc	17	0	0	0	0	0	0	0	0	0	0	0	0	0	0	17	0	0	0	0	0	0	0	0	0	0	0	0	0	0	0	0	0	0	0	0	0	0
Bacillariophyta	0.947368	AY571757	NA	NA	NA	NA	phylum	[]	NA	2836	aaacatcattgcaggtacaatggaagaagtttacaaacgtgctgagtacgctaaagccgttggttctatcgttgtt	17	0	0	0	0	17	0	0	0	0	0	0	0	0	0	0	0	0	0	0	0	0	0	0	0	0	0	0	0	0	0	0	0	0	0	0	0	0
Bacillariophyta	0.934211	AF015569	NA	NA	NA	NA	phylum	[]	NA	2836	aaacattactgctgcgacaatggaagaagtatacaaacgtgctgagtatgctaaagaaataggttctatcgttgtt	16	0	0	0	0	0	0	0	0	0	0	0	0	0	0	0	16	0	0	0	0	0	0	0	0	0	0	0	0	0	0	0	0	0	0	0	0	0
Bacillariophyta	0.947368	DQ514803	NA	NA	NA	NA	phylum	[]	NA	2836	aaacattactgctgcgacgatggaagaagtatacaaacgtgctgagtatgctaaagctattggttctgtaattatt	16	0	0	0	0	0	0	0	0	0	0	0	0	0	0	0	0	0	0	0	0	0	0	0	0	16	0	0	0	0	0	0	0	0	0	0	0	0
Bacillariophyta	0.921053	KC969715	NA	NA	NA	NA	phylum	[]	NA	2836	aaacgttacttctgctactatggaagaagtatacaaacgtgctgagtacgctaaagaagttggttcaatcgtaatc	16	0	0	0	0	0	0	0	0	0	0	0	0	16	0	0	0	0	0	0	0	0	0	0	0	0	0	0	0	0	0	0	0	0	0	0	0	0
Bacillariophyta	0.921053	KY320315	NA	NA	NA	NA	phylum	['Nitzschia sp. 1BOF', 'Bacillaria paxillifer', 'Plagiostriata baltica', 'Cylindrotheca closterium', 'Cylindrotheca sp. 1BOF', 'Cylindrotheca sp. 2BOF', 'Cylindrotheca sp. 3BOF', 'Hantzschia amphioxys', 'Chaetoceros constrictus', 'Achnanthes sp.', 'Nitzschia liebethruthii', 'Bacillaria sp.']	NA	2836	aaacgttacaggtgctactatggaagaagtgtacaaacgttctaagtacactaaagaagtaggttctattgttatc	16	0	0	0	0	0	16	0	0	0	0	0	0	0	0	0	0	0	0	0	0	0	0	0	0	0	0	0	0	0	0	0	0	0	0	0	0	0
Bacillariophyta	0.921053	HE663062	NA	NA	NA	NA	phylum	[]	NA	2836	aaacattactgctggtacaatggaagacgtatacaaacgtacagaatacgcgaaagctgtaggttctatcgttgta	15	0	0	0	0	0	0	0	0	0	0	0	0	0	0	0	0	0	0	0	0	0	0	0	0	0	0	0	0	0	0	0	0	0	0	0	0	15
Bacillariophyta	0.934211	AM710460	NA	NA	NA	NA	phylum	[]	NA	2836	aaacgtaactgctggtacaatggaagaagtatacaaacgtgctgagtatgctagagtagttggttctgttgttgta	15	0	0	0	0	0	0	0	0	0	0	0	0	0	0	0	0	0	0	0	0	0	0	0	0	0	0	0	0	0	0	15	0	0	0	0	0	0
Bacillariophyta	0.960526	HQ912488	NA	NA	NA	NA	phylum	['Dimeregramma sp. SZCZCH437', 'Thalassiosira minima', 'Licmophora aff. ehrenbergii MPA-2015', 'Skeletonema sp.', 'Halamphora sp. SZCZCH623', 'Hemiaulus sinensis', 'Guinardia striata', 'Grammonema sp. NE-2015', 'Thalassiosira minuscula']	NA	2836	aaacgttacagctgccactatggaagaagtatacaaacgtgctgagtatgctaaagctgttggttctgtaattatt	15	0	0	0	0	0	0	0	0	0	0	0	0	0	0	0	0	0	0	0	0	0	0	0	0	0	0	0	0	0	0	15	0	0	0	0	0	0
Bacillariophyta	0.921053	KC802088	NA	NA	NA	NA	phylum	[]	NA	2836	aaacgtaactgcagcgactatggaagaagtgtacaagcgtgctgagtatgctaaagctattggttctgtagttgtt	14	0	0	0	0	0	0	0	0	0	0	0	0	0	0	0	0	14	0	0	0	0	0	0	0	0	0	0	0	0	0	0	0	0	0	0	0	0
Bacillariophyta	0.973684	AB831880	NA	NA	NA	NA	phylum	['Cyclostephanos dubius', 'Thalassiosira nodulolineata', 'Thalassiosira minima', 'Thalassiosira antarctica', 'Cyclostephanos invisitatus', 'Cyclostephanos tholiformis', 'Hemiaulus sinensis']	NA	2836	aaacatcacagctgctactatggaagaagtatacaaacgtgctgagtatgctaaagctgttggttctgtaattgtt	14	0	0	14	0	0	0	0	0	0	0	0	0	0	0	0	0	0	0	0	0	0	0	0	0	0	0	0	0	0	0	0	0	0	0	0	0	0
Bacillariophyta	0.947368	DQ514795	NA	NA	NA	NA	phylum	[]	NA	2836	aaacatcacagctgctactatggaagaagtatacaagcgtgctgagtatgctaaagccattggttctatcgttgtt	14	0	0	0	0	0	0	0	0	0	0	0	14	0	0	0	0	0	0	0	0	0	0	0	0	0	0	0	0	0	0	0	0	0	0	0	0	0
Bacillariophyta	0.909091	KM084942	NA	NA	NA	NA	phylum	[]	NA	2836	taacgttactgcagctactatggaagacgtttacaaacgtgcagagtatgctaagtaagtcggttctatcattgta	14	0	0	0	0	0	0	0	0	0	0	0	14	0	0	0	0	0	0	0	0	0	0	0	0	0	0	0	0	0	0	0	0	0	0	0	0	0
Bacillariophyta	0.947368	KC969854	NA	NA	NA	NA	phylum	['Thalassiosira sp. 11BOF', 'Thalassiosira decipiens', 'Navicula radiosa', 'Navicula capitatoradiata', 'Cyclostephanos invisitatus', 'Licmophora aff. ehrenbergii MPA-2015', 'Thalassiosira angulata', 'Detonula pumila', 'Thalassiosira minuscula']	NA	2836	aaacgttactgcagctactatgaaagaagtatacaaacgtgctgagtatgctaaagctattggttctgtagttgtt	14	0	0	14	0	0	0	0	0	0	0	0	0	0	0	0	0	0	0	0	0	0	0	0	0	0	0	0	0	0	0	0	0	0	0	0	0	0
Bacillariophyta	0.947368	DQ514827	NA	NA	NA	NA	phylum	[]	NA	2836	aaacatcacagctgctactatggaagaagtatacaaacgtgctgagtatgctaaagaaataggttctatcgttgtt	14	0	0	0	0	0	0	0	0	0	0	0	0	0	0	14	0	0	0	0	0	0	0	0	0	0	0	0	0	0	0	0	0	0	0	0	0	0
Bacillariophyta	0.921053	HQ912534	NA	NA	NA	NA	phylum	[]	NA	2836	aaacgttactgcagctactatggaagacgtttacaaacgtgcagagtatgctaagcaagtcggttctatcattgtg	13	0	0	0	0	0	0	0	0	0	0	0	0	0	0	0	0	0	0	0	0	0	0	0	0	0	0	13	0	0	0	0	0	0	0	0	0	0
Bacillariophyta	0.947368	AM710460	NA	NA	NA	NA	phylum	['Gomphonema affine', 'Gomphonema cf. angustatum', 'Gomphonema parvulum', 'Gomphonema productum', 'Geissleria decussis', 'Gomphonema carolinense', 'Halamphora sp.', 'Gomphonema intricatum', 'Achnanthidium reimeri', 'Berkeleya sp. 10SEH', 'Detonula pumila', 'Entomoneis tenera']	NA	2836	aaacatcactgctgctacaatggaagaagtatacaaacgtgctgagtatgctagagtagttggttctgttgttgta	13	0	0	0	0	0	0	0	0	0	0	0	0	0	0	13	0	0	0	0	0	0	0	0	0	0	0	0	0	0	0	0	0	0	0	0	0	0
Bacillariophyta	0.947368	HQ912487	NA	NA	NA	NA	phylum	['Nitzschia sp. (in: Bacillariophyta)', 'Nitzschia sigma', 'Plagiogrammopsis vanheurckii', 'Opephora sp. ECT3831-Opep']	NA	2836	aaacgtaacagctgcaacaatggaagaagtgtacaaacgtgctgagtatgctaaagaagttggttctgtaatcatc	13	0	0	0	0	0	0	0	0	0	0	0	0	0	0	0	0	0	0	0	0	0	0	0	0	0	0	0	0	0	0	0	0	0	0	13	0	0
Bacillariophyta	0.960526	KC969854	NA	NA	NA	NA	phylum	['Thalassiosira sp. 11BOF', 'Navicula capitatoradiata', 'Navicula radiosa', 'Thalassiosira angulata', 'Detonula pumila', 'Thalassiosira minuscula']	NA	2836	aaacattactgcagcaactatggaagaagtatacaaacgtgctgagtatgctaaagctattggttctgtagttgtt	13	0	0	0	0	0	0	0	0	0	0	0	0	0	0	0	13	0	0	0	0	0	0	0	0	0	0	0	0	0	0	0	0	0	0	0	0	0
Bacillariophyta	0.922078	KY320317	NA	NA	NA	NA	phylum	['Nitzschia sp. s0819', 'Didymosphenia geminata', 'Bacillaria sp.', 'Navicula incertata', 'Amphora proteoides', 'Nitzschia liebethruthii', 'Bacillaria paxillifer']	NA	2836	aaacattacagctgcaactcaagaagaagtatacaaacgtgctgagtatgctaaagaaataggttctatcgttgtt	13	0	0	0	0	0	0	0	0	0	0	0	0	0	0	0	0	0	0	0	0	0	0	0	0	13	0	0	0	0	0	0	0	0	0	0	0	0
Bacillariophyta	0.947368	HQ912488	NA	NA	NA	NA	phylum	[]	NA	2836	aaacattactgctgcgacgatggaagaagtatacaaacgtgctgagtatgctaaagctgttggttctgtaattatt	13	0	0	0	0	0	0	0	0	0	0	0	0	0	0	0	0	0	0	0	0	0	0	0	0	13	0	0	0	0	0	0	0	0	0	0	0	0
Bacillariophyta	0.907895	KJ577893	NA	NA	NA	NA	phylum	['Eucampia antarctica', 'Chaetoceros sp. 14BOF', 'Tryblionella apiculata', 'Navicula sp. SZCZCH965', 'Eucampia cornuta', 'Achnanthes sp. CCAP 1095/1', 'Cerataulina pelagica', 'Lauderia annulata']	NA	2836	aaacgtaactgcagcgactatggaagaagtgtacaagcgtgctgactatgctaaagctgttggttctgttataatc	12	0	0	0	0	0	0	0	0	0	0	0	0	0	0	0	0	0	0	0	0	0	0	0	0	0	0	0	0	0	0	0	0	12	0	0	0	0
Bacillariophyta	0.921053	HQ912534	NA	NA	NA	NA	phylum	[]	NA	2836	taacgttactgcagctactatggaagaagtttacaaacgtgcagagtatgctaagcaagtcggttctatcattgtg	12	0	0	0	0	0	0	0	0	0	0	0	0	0	0	0	0	0	0	0	0	0	0	0	0	0	0	0	0	0	12	0	0	0	0	0	0	0
Bacillariophyta	0.934211	KC802088	NA	NA	NA	NA	phylum	['Thalassiosira sp. 10BOF', 'Thalassiosira minima', 'Thalassiosira sundarbana', 'Cyclostephanos invisitatus', 'Hemiaulus sinensis', 'Thalassiosira angulata', 'Grammonema sp. NE-2015', 'Conticribra weissflogii']	NA	2836	aaacgtaactgcagcgactatggaagaagtgtacaaacgtgctgagtatgctaaagctattggttctgtagttgtt	12	0	0	0	0	0	0	0	0	0	0	0	0	0	0	0	12	0	0	0	0	0	0	0	0	0	0	0	0	0	0	0	0	0	0	0	0	0
Bacillariophyta	0.960526	DQ514795	NA	NA	NA	NA	phylum	['Thalassiosira sp. 10BOF', 'Thalassiosira sp. 11BOF', 'Thalassiosira decipiens', 'Navicula radiosa', 'Navicula capitatoradiata', 'Thalassiosira sundarbana', 'Thalassiosira antarctica', 'Cyclostephanos invisitatus', 'Lindavia radiosa', 'Thalassiosira angulata', 'Detonula pumila', 'Thalassiosira minuscula']	NA	2836	aaacgttacagcggctactatggaagaagtatacaaacgtgctgagtatgctaaagctattggttctgtagttgtt	12	0	0	0	12	0	0	0	0	0	0	0	0	0	0	0	0	0	0	0	0	0	0	0	0	0	0	0	0	0	0	0	0	0	0	0	0	0
Bacillariophyta	0.934211	KY320315	NA	NA	NA	NA	phylum	['Nitzschia sp. 1BOF', 'Cylindrotheca closterium', 'Cylindrotheca sp. 1BOF', 'Cylindrotheca sp. 2BOF', 'Hantzschia amphioxys', 'Plagiostriata baltica', 'Nitzschia liebethruthii', 'Bacillaria paxillifer']	NA	2836	aaacgttacagctgccactatggaagaagtatacaaacgtgctgagtacgctaaagaagttggttcaatcgtaatc	12	0	0	0	0	0	0	0	0	0	0	0	0	12	0	0	0	0	0	0	0	0	0	0	0	0	0	0	0	0	0	0	0	0	0	0	0	0
Bacillariophyta	0.934211	KY320315	NA	NA	NA	NA	phylum	['Nitzschia sp. 1BOF', 'Cylindrotheca closterium', 'Cylindrotheca sp. 1BOF', 'Cylindrotheca sp. 2BOF', 'Hantzschia amphioxys', 'Plagiostriata baltica', 'Nitzschia liebethruthii', 'Bacillaria paxillifer']	NA	2836	aaacgttacagctgctacaatggaagaagtgtacaaacgtgctgagtacgctaaagaagttggttcaatcgtaatc	12	0	0	0	0	0	0	0	0	0	0	0	0	12	0	0	0	0	0	0	0	0	0	0	0	0	0	0	0	0	0	0	0	0	0	0	0	0
Bacillariophyta	0.921053	KJ577893	NA	NA	NA	NA	phylum	['Chaetoceros sp. 14BOF', 'Eucampia cornuta', 'Navicula sp. SZCZCH965', 'Cerataulina pelagica']	NA	2836	aaacgtaactgcagcgactatggaagaagtgtacaaacgtgctgactacgctaaagctgttggttctgttgtaatc	12	0	0	0	0	0	0	0	0	0	0	0	0	0	0	0	0	0	0	0	0	0	0	0	0	0	12	0	0	0	0	0	0	0	0	0	0	0
Bacillariophyta	0.948052	AB831880	NA	NA	NA	NA	phylum	['Cyclostephanos dubius', 'Thalassiosira nodulolineata', 'Thalassiosira minuscula', 'Cyclostephanos invisitatus', 'Cyclostephanos tholiformis', 'Discostella stelligera', 'Asterionellopsis guyunusae']	NA	2836	aaacatcacagctgctactatggaagaagtatacaaacgtgctgagtatgctaaagaagttggttctgtaattatc	12	0	0	0	0	0	0	0	0	0	0	0	0	0	0	12	0	0	0	0	0	0	0	0	0	0	0	0	0	0	0	0	0	0	0	0	0	0
Bacillariophyta	0.921053	FJ002154	NA	NA	NA	NA	phylum	['Chaetoceros socialis']	NA	2836	aaatgtaactgcggcaacaatggaagaagtgtacaaacgttctgagtacgctaagcaggttggttctgtaattatc	12	0	0	0	0	0	0	0	0	0	0	0	0	0	0	0	0	0	0	0	0	0	0	0	0	0	0	0	0	0	0	0	0	0	0	0	0	12
Bacillariophyta	0.947368	DQ514803	NA	NA	NA	NA	phylum	[]	NA	2836	aaacattactgctgcgacaatggaagaagtatacaaacgtgctgagtatgctaaagctattggttctgtaattatc	11	0	0	0	0	0	0	0	0	0	0	0	0	0	0	11	0	0	0	0	0	0	0	0	0	0	0	0	0	0	0	0	0	0	0	0	0	0
Bacillariophyta	0.947368	AB430670	NA	NA	NA	NA	phylum	[]	NA	2836	aaacattactgctgcgacaatggaagaagtatacaaacgtgctgagtatgctaaagcaatcggttctatcgttgtt	11	0	0	0	0	0	0	0	0	0	0	0	0	0	0	0	11	0	0	0	0	0	0	0	0	0	0	0	0	0	0	0	0	0	0	0	0	0
Bacillariophyta	0.934211	KC309578	NA	NA	NA	NA	phylum	['Chaetoceros cf. contortus 1 SEH-2013', 'Plagiogrammopsis vanheurckii']	NA	2836	aaacattacagctgcgacaatggaagaagtttacaaacgttctgagtacgctaagcaagttggttctattgtaatc	11	0	0	0	0	0	0	0	0	0	0	0	0	0	0	0	0	0	0	0	0	0	0	0	0	0	0	0	0	0	0	11	0	0	0	0	0	0
Bacillariophyta	0.947368	JN975264	NA	NA	NA	NA	phylum	['Nitzschia sigma', 'Opephora sp. ECT3831-Opep']	NA	2836	aaacatcacagctgctactatggaagaagtttacaaacgttcagaatatgctaaagcagtaggttctgtaattatc	11	0	0	0	0	0	0	0	0	0	0	0	0	0	0	11	0	0	0	0	0	0	0	0	0	0	0	0	0	0	0	0	0	0	0	0	0	0
Bacillariophyta	0.947368	AM710432	NA	NA	NA	NA	phylum	['Pleurosigma sp.', 'Opephora sp. ECT3831-Opep', 'Hippodonta capitata', 'Nitzschia sigma', 'Halamphora adumbratoides', 'Halamphora americana', 'Haslea crucigera', 'Haslea nipkowii', 'Amphora sp. CTM 20023']	NA	2836	aaacgttactgcagctactatggaagaagtttacaaacgttcagaatatgctaaagcagtaggttctgtaattatc	11	0	0	0	0	0	0	0	0	0	0	0	0	0	0	11	0	0	0	0	0	0	0	0	0	0	0	0	0	0	0	0	0	0	0	0	0	0
Bacillariophyta	0.922078	DQ514827	NA	NA	NA	NA	phylum	[]	NA	2836	aaacatcacagcggctactatggaagaagtatacaaacgtgctgagtatgctaaacaaattggttctattgttatt	11	0	0	0	0	0	0	0	0	0	0	0	0	0	0	0	0	0	0	0	0	0	0	0	0	11	0	0	0	0	0	0	0	0	0	0	0	0
Bacillariophyta	0.907895	KY320298	NA	NA	NA	NA	phylum	[]	NA	2836	aaacgttacttctgctactatggaagaagtatacaaacgtgctgagtacgctaaaatggtaggttctatcgtagtt	11	0	0	0	0	0	0	0	0	0	0	0	0	0	0	11	0	0	0	0	0	0	0	0	0	0	0	0	0	0	0	0	0	0	0	0	0	0
Bacillariophyta	0.960526	KC969854	NA	NA	NA	NA	phylum	['Thalassiosira sp. 11BOF', 'Navicula capitatoradiata', 'Navicula radiosa', 'Thalassiosira angulata', 'Detonula pumila', 'Thalassiosira minuscula']	NA	2836	aaacatcacagcagctacaatggaagaagtttacaagcgtgctgagtatgctaaagctattggttctgtagttgtt	11	0	0	0	0	0	0	0	0	0	0	0	0	0	0	0	0	11	0	0	0	0	0	0	0	0	0	0	0	0	0	0	0	0	0	0	0	0
Bacillariophyta	0.947368	JN975264	NA	NA	NA	NA	phylum	['Nitzschia sigma', 'Opephora sp. ECT3831-Opep']	NA	2836	aaacgttacttctgctactatggaagaagtatacaaacgttcagaatatgctaaagcagtaggttctgtaattatc	11	0	0	0	0	0	0	0	0	0	0	0	0	0	0	11	0	0	0	0	0	0	0	0	0	0	0	0	0	0	0	0	0	0	0	0	0	0
Bacillariophyta	0.921053	FJ002154	NA	NA	NA	NA	phylum	['Chaetoceros socialis']	NA	2836	aaatgtaactgcggcaacaatggaagaagtgtacaaacgtcctgagtacgctaagcaagttggttctgtaattatc	11	0	0	0	0	0	0	0	0	0	0	0	0	0	0	0	0	0	0	0	0	0	0	0	0	0	0	0	0	0	0	0	0	0	0	0	0	11
Bacillariophyta	0.921053	KY937694	NA	NA	NA	NA	phylum	[]	NA	2836	aaacgtaacagctgcaacaatggaagaagtgtacaaacgtgcagagtacgctaaaatggttggttctgtaattgtt	11	0	0	0	0	0	0	0	0	0	0	0	0	0	0	0	0	0	0	0	0	0	0	0	0	11	0	0	0	0	0	0	0	0	0	0	0	0
Bacillariophyta	0.907895	KJ577893	NA	NA	NA	NA	phylum	['Eucampia antarctica', 'Chaetoceros sp. 14BOF', 'Tryblionella apiculata', 'Navicula sp. SZCZCH965', 'Eucampia cornuta', 'Achnanthes sp. CCAP 1095/1', 'Cerataulina pelagica', 'Lauderia annulata']	NA	2836	aaacataactgcagcgactatggaagaagtgtacaagcgtgctgactatgctaaagctgttggttctgttgtaatc	10	0	0	0	0	0	0	0	0	0	0	0	0	0	0	0	0	0	0	0	0	0	0	0	0	0	0	0	0	0	0	0	0	0	0	10	0	0
Bacillariophyta	0.921053	HE663062	NA	NA	NA	NA	phylum	[]	NA	2836	aaacattactgctggtacaatggaagacgtatacaaacgtgcagaatacgcgaaagctgtaggttctatcgttata	10	0	0	0	0	0	0	0	0	0	0	0	0	0	0	0	0	0	0	0	0	0	0	0	0	0	0	0	0	0	0	0	0	0	0	0	0	10
Bacillariophyta	0.907895	KJ577893	NA	NA	NA	NA	phylum	['Eucampia antarctica', 'Chaetoceros sp. 14BOF', 'Tryblionella apiculata', 'Navicula sp. SZCZCH965', 'Eucampia cornuta', 'Achnanthes sp. CCAP 1095/1', 'Cerataulina pelagica', 'Lauderia annulata']	NA	2836	aaacgttactgcagcgactatggaagaagtgtacaagcgtgctgactatgctaaagctgttggttctgttgtaatc	10	0	0	0	0	0	0	0	0	0	0	0	0	0	0	0	0	0	0	0	0	0	0	0	0	0	0	0	0	0	0	0	0	10	0	0	0	0
Bacillariophyta	0.960526	AF015569	NA	NA	NA	NA	phylum	['Navicula tripunctata', 'Thalassiosira decipiens', 'Gomphonema sp. 2LB', 'Navicula lanceolata', 'Skeletonema sp.', 'Skeletonema pseudocostatum', 'Skeletonema costatum']	NA	2836	aaacgttactgcagctactatggaagaagtatacaaacgtgctgagtatgctaaagctgttggttctatcgttgtt	10	0	0	0	0	0	0	0	0	0	0	0	0	10	0	0	0	0	0	0	0	0	0	0	0	0	0	0	0	0	0	0	0	0	0	0	0	0
Bacillariophyta	0.935065	AB831880	NA	NA	NA	NA	phylum	[]	NA	2836	aaacatcacagcggctactatggaagaagtatacaaacgtgctgagtatgctaaagaagttggttctgtaattatc	10	0	0	0	0	0	0	0	0	0	0	0	0	0	0	10	0	0	0	0	0	0	0	0	0	0	0	0	0	0	0	0	0	0	0	0	0	0
Bacillariophyta	0.947368	DQ514795	NA	NA	NA	NA	phylum	[]	NA	2836	aaacgttatagctgccactatggaagaagtatacaaacgtgctgagtatgctaaagctattggttctgtagttgtt	10	0	0	10	0	0	0	0	0	0	0	0	0	0	0	0	0	0	0	0	0	0	0	0	0	0	0	0	0	0	0	0	0	0	0	0	0	0
Bacillariophyta	0.947368	MF000636	NA	NA	NA	NA	phylum	[]	NA	2836	aaacatcactgctggtacaatggaagaagtttacaaacgtgctgagtacgctaaagccgttggttctatcgttatc	10	0	0	0	0	0	0	0	0	0	0	0	0	0	0	10	0	0	0	0	0	0	0	0	0	0	0	0	0	0	0	0	0	0	0	0	0	0
Bacillariophyta	0.960526	DQ514798	NA	NA	NA	NA	phylum	['Thalassiosira sp. 11BOF', 'Navicula capitatoradiata', 'Navicula radiosa', 'Thalassiosira nordenskioeldii', 'Thalassiosira angulata', 'Detonula pumila', 'Thalassiosira minuscula']	NA	2836	aaacattactgcggctacaatggaagaagtatacaaacgtgctgagtatgctgaagctattggttctgtagttgtt	10	0	0	0	0	0	0	0	0	0	0	0	0	0	0	0	0	0	0	0	0	0	0	0	0	0	0	0	0	0	0	0	0	0	10	0	0	0
Bacillariophyta	0.947368	AM710500	NA	NA	NA	NA	phylum	[]	NA	2836	aaacatcactgctgctacaatggaagaagtatacaaacgtgctgagtacgctaaagaagttggttctgtaattatc	10	0	0	0	0	0	0	0	0	0	0	0	0	0	0	10	0	0	0	0	0	0	0	0	0	0	0	0	0	0	0	0	0	0	0	0	0	0
Bacillariophyta	0.934211	KY320317	NA	NA	NA	NA	phylum	['Nitzschia sp. s0819', 'Didymosphenia geminata', 'Bacillaria sp.', 'Amphora proteoides', 'Nitzschia liebethruthii', 'Bacillaria paxillifer']	NA	2836	aaacgttacagctgcaactatggaagaagtgtacaaacgtgctgagtacgctaaagaggttggttctgtagttgtt	10	0	0	0	0	0	0	0	0	0	0	0	0	0	0	0	0	0	0	0	0	0	10	0	0	0	0	0	0	0	0	0	0	0	0	0	0	0
Bacillariophyta	0.909091	KY320319	NA	NA	NA	NA	phylum	['Hantzschia amphioxys', 'Nitzschia cf. paleacea', 'Chaetoceros didymus']	NA	2836	aaatgttactgctgccacaatggacgaagttattaaacgtgcagagtacgctaaagaagtaggttctgtaattatc	10	0	0	0	0	0	0	0	0	0	10	0	0	0	0	0	0	0	0	0	0	0	0	0	0	0	0	0	0	0	0	0	0	0	0	0	0	0
Bacterosira	1	DQ514798	Bacterosira	Thalassiosiraceae	Thalassiosirales	Mediophyceae	genus	[]	NA	382376	aaacatcactgctgctacaatggaagaagtatacaaacgtgctgagtatgctaaagctattggttctgtagttgtt	54401	23	286	591	809	203	135	0	0	25	0	1257	31	0	0	2761	0	0	0	108	0	0	0	80	10408	98	2841	3345	0	9687	4479	0	1029	440	4956	7480	79	3250
Bacterosira	0.986842	DQ514798	Bacterosira	Thalassiosiraceae	Thalassiosirales	Mediophyceae	genus	[]	NA	382376	aaacatcactgctgcgacaatggaagaagtatacaaacgtgctgagtatgctaaagctattggttctgtagttgtt	876	12	10	16	30	11	0	0	0	0	0	25	20	0	0	14	43	39	71	19	60	22	25	0	27	16	0	0	12	40	13	22	22	15	27	116	61	88
Bacterosira	0.986842	DQ514798	Bacterosira	Thalassiosiraceae	Thalassiosirales	Mediophyceae	genus	[]	NA	382376	aaacatcactgctgctacaatggaagaagtatacaagcgtgctgagtatgctaaagctattggttctgtagttgtt	471	0	0	0	0	0	0	0	0	0	0	0	0	0	0	0	0	0	0	0	0	0	0	0	0	0	0	10	0	0	0	0	434	0	12	15	0	0
Bacterosira	0.986842	DQ514798	Bacterosira	Thalassiosiraceae	Thalassiosirales	Mediophyceae	genus	[]	NA	382376	aaacatcactgctgctacaatggaagaagtatacaaacgtgctgagtatgctaaagctattggttctgtagttgtc	74	0	0	0	0	0	0	0	0	0	0	0	0	0	0	24	0	0	0	0	0	0	0	0	0	0	0	0	0	0	50	0	0	0	0	0	0	0
Bacterosira	0.986842	DQ514798	Bacterosira	Thalassiosiraceae	Thalassiosirales	Mediophyceae	genus	[]	NA	382376	aaacatcactgctgctataatggaagaagtatacaaacgtgctgagtatgctaaagctattggttctgtagttgtt	70	0	0	0	0	0	0	0	0	0	0	0	70	0	0	0	0	0	0	0	0	0	0	0	0	0	0	0	0	0	0	0	0	0	0	0	0	0
Bacterosira	0.960526	DQ514798	Bacterosira	Thalassiosiraceae	Thalassiosirales	Mediophyceae	genus	[]	NA	382376	aaacgtaactgctggtacaatggaagaagtatacaaacgtgctgagtatgctaaagctattggttctgtagttgtt	48	0	0	0	0	0	0	0	0	0	0	0	0	0	0	0	0	0	0	0	0	0	0	0	0	0	0	0	0	0	0	48	0	0	0	0	0	0
Bacterosira	0.986842	DQ514798	Bacterosira	Thalassiosiraceae	Thalassiosirales	Mediophyceae	genus	[]	NA	382376	aaacaccactgctgctacaatggaagaagtatacaaacgtgctgagtatgctaaagctattggttctgtagttgtt	35	0	0	0	0	0	0	0	0	0	0	0	0	0	0	0	0	0	0	0	0	0	0	0	12	0	0	0	0	0	11	0	0	0	12	0	0	0
Bacterosira	0.986842	DQ514798	Bacterosira	Thalassiosiraceae	Thalassiosirales	Mediophyceae	genus	[]	NA	382376	aaacatcgctgctgctacaatggaagaagtatacaaacgtgctgagtatgctaaagctattggttctgtagttgtt	33	0	0	0	0	0	0	0	0	0	0	0	0	0	0	0	0	0	0	0	0	0	0	0	20	0	0	0	0	13	0	0	0	0	0	0	0	0
Bacterosira	0.986842	DQ514798	Bacterosira	Thalassiosiraceae	Thalassiosirales	Mediophyceae	genus	[]	NA	382376	aaacatcactgcagctacaatggaagaagtatacaaacgtgctgagtatgctaaagctattggttctgtagttgtt	32	0	0	0	0	0	0	0	0	0	0	0	0	0	0	0	0	0	0	0	0	0	0	0	0	0	0	0	0	32	0	0	0	0	0	0	0	0
Bacterosira	0.973684	DQ514798	Bacterosira	Thalassiosiraceae	Thalassiosirales	Mediophyceae	genus	[]	NA	382376	aaacgtaactgctgctacaatggaagaagtatacaaacgtgctgagtatgctaaagctattggttctgtagttgtt	26	0	0	0	0	0	0	0	0	0	0	0	11	0	0	0	0	0	0	0	0	0	0	0	0	15	0	0	0	0	0	0	0	0	0	0	0	0
Bacterosira	0.986842	DQ514798	Bacterosira	Thalassiosiraceae	Thalassiosirales	Mediophyceae	genus	[]	NA	382376	aaacatcactgttgctacaatggaagaagtatacaaacgtgctgagtatgctaaagctattggttctgtagttgtt	23	0	0	0	0	23	0	0	0	0	0	0	0	0	0	0	0	0	0	0	0	0	0	0	0	0	0	0	0	0	0	0	0	0	0	0	0	0
Bacterosira	0.960526	DQ514798	Bacterosira	Thalassiosiraceae	Thalassiosirales	Mediophyceae	genus	[]	NA	382376	aaacgtaactgctgctacaatggaagaagtttacaaacgtgctgagtatgctaaagctattggttctgtagttgtt	13	0	0	13	0	0	0	0	0	0	0	0	0	0	0	0	0	0	0	0	0	0	0	0	0	0	0	0	0	0	0	0	0	0	0	0	0	0
Bacterosira	0.986842	DQ514798	Bacterosira	Thalassiosiraceae	Thalassiosirales	Mediophyceae	genus	[]	NA	382376	aaacatcactgctgctacaatggaagaagtatacaaacgtgctgggtatgctaaagctattggttctgtagttgtt	12	0	0	0	0	0	0	0	0	0	0	0	0	0	0	0	0	0	0	0	0	0	0	0	0	0	0	0	0	12	0	0	0	0	0	0	0	0
Bacterosira	0.986842	DQ514798	Bacterosira	Thalassiosiraceae	Thalassiosirales	Mediophyceae	genus	[]	NA	382376	aaacatcactgctgctacaatggaagaagtatacaaacgtgctgagtatgctaaagctattgattctgtagttgtt	12	0	0	0	0	12	0	0	0	0	0	0	0	0	0	0	0	0	0	0	0	0	0	0	0	0	0	0	0	0	0	0	0	0	0	0	0	0
Bacterosira	0.947368	DQ514798	Bacterosira	Thalassiosiraceae	Thalassiosirales	Mediophyceae	genus	[]	NA	382376	aaacgtaactgctggtacaatggaagaagtatacaaacgttctgagtatgctaaagctattggttctgtagttgtt	12	0	0	0	0	0	0	0	0	0	0	0	0	0	0	0	0	0	0	0	0	0	0	0	0	0	0	0	0	0	0	12	0	0	0	0	0	0
Bacterosira	0.986842	DQ514798	Bacterosira	Thalassiosiraceae	Thalassiosirales	Mediophyceae	genus	[]	NA	382376	aaacataactgctgctacaatggaagaagtatacaaacgtgctgagtatgctaaagctattggttctgtagttgtt	11	0	0	0	0	0	0	0	0	0	0	0	0	0	0	0	0	0	0	0	0	0	0	0	0	0	0	0	0	0	0	0	0	0	0	11	0	0
Berkeleya sp. 14SEH	1	JX905585	Berkeleya	Berkeleyaceae	Naviculales	Bacillariophyceae	species	['Berkeleya sp. 14SEH']	Berkeleya sp. 14SEH	1259743	aaacatcactgccggtacaatggaagaagtatataaacgtgctgaatatgctaaagctgttggttctatcgttgtt	34	0	0	0	34	0	0	0	0	0	0	0	0	0	0	0	0	0	0	0	0	0	0	0	0	0	0	0	0	0	0	0	0	0	0	0	0	0
Cerataulina pelagica	1	HQ912533	Cerataulina	Hemiaulaceae	Hemiaulales	Mediophyceae	species	['Cerataulina pelagica']	Cerataulina pelagica	1003031	aaacgtaactgcagcaactatggaagaagtatacaaacgttctgagtatgctaaaacagttggttcagtagtaatc	2301	0	0	0	0	0	0	0	0	0	0	0	0	0	0	0	0	0	0	1599	572	130	0	0	0	0	0	0	0	0	0	0	0	0	0	0	0	0
Cerataulina pelagica	0.986842	HQ912533	Cerataulina	Hemiaulaceae	Hemiaulales	Mediophyceae	species	['Cerataulina pelagica']	Cerataulina pelagica	1003031	aaacgtaactgcagcaattatggaagaagtatacaaacgttctgagtatgctaaaacagttggttcagtagtaatc	28	0	0	0	0	0	0	0	0	0	0	0	0	0	0	0	0	0	0	0	0	28	0	0	0	0	0	0	0	0	0	0	0	0	0	0	0	0
Chaetoceros	1	KC985540	Chaetoceros	Chaetocerotaceae	Chaetocerotales	Mediophyceae	genus	[]	NA	49237	aaatgtaactgctgccactatggaagaagtttacaaacgttcagaatatgctaaagcagtaggttctgtaattatc	99842	260	27	156	1102	49	204	665	2388	3984	227	701	266	1668	1457	10537	293	836	8077	1354	11546	3093	6533	1144	0	78	0	12665	6758	110	3957	2499	1430	0	0	12298	3480	0
Chaetoceros	1	AB430666	Chaetoceros	Chaetocerotaceae	Chaetocerotales	Mediophyceae	genus	[]	NA	49237	aaatgtaactgcttctacaatggaagaagtttacaaacgttcagaatacgctaagcaagttggttctgtagttatc	9900	0	0	0	100	0	27	0	0	0	0	0	0	0	0	0	0	0	0	0	0	0	0	0	0	0	0	0	6955	0	2104	0	0	0	0	0	714	0
Chaetoceros	0.986842	KC969706	Chaetoceros	Chaetocerotaceae	Chaetocerotales	Mediophyceae	genus	['Chaetoceros sp. 7BOF', 'Chaetoceros cf. decipiens 2 SEH-2013']	NA	49237	aaacgtaactgctgccactatggaagaagtttacaaacgtgcagaatatgctaagcaagtaggttctgtagtaatc	2643	0	0	0	0	0	0	0	0	0	0	0	0	0	0	2643	0	0	0	0	0	0	0	0	0	0	0	0	0	0	0	0	0	0	0	0	0	0
Chaetoceros	0.986842	KC985540	Chaetoceros	Chaetocerotaceae	Chaetocerotales	Mediophyceae	genus	[]	NA	49237	aaatgtaactgttgccactatggaagaagtttacaaacgttcagaatatgctaaagcagtaggttctgtaattatc	2369	0	0	0	0	0	0	0	0	0	0	0	0	0	0	0	0	0	2369	0	0	0	0	0	0	0	0	0	0	0	0	0	0	0	0	0	0	0
Chaetoceros	0.986842	KC985540	Chaetoceros	Chaetocerotaceae	Chaetocerotales	Mediophyceae	genus	[]	NA	49237	aaatgtaactgctgccactatggaagaagtttacaaacgttcagaatatgctaaagcagtaggttctgtaattatt	897	0	0	0	0	0	0	0	0	0	0	0	0	0	0	12	0	0	0	0	852	0	22	0	0	0	0	11	0	0	0	0	0	0	0	0	0	0
Chaetoceros	0.986842	KC985540	Chaetoceros	Chaetocerotaceae	Chaetocerotales	Mediophyceae	genus	[]	NA	49237	aaatgtaactgctgccactatggaagaagtttataaacgttcagaatatgctaaagcagtaggttctgtaattatc	818	0	0	0	0	0	0	0	0	0	0	0	0	0	0	0	0	0	818	0	0	0	0	0	0	0	0	0	0	0	0	0	0	0	0	0	0	0
Chaetoceros	0.986842	KC985540	Chaetoceros	Chaetocerotaceae	Chaetocerotales	Mediophyceae	genus	[]	NA	49237	aaatgtaactgctgccactatggaagaagtttacaaacgttcagaatatgctaaagtagtaggttctgtaattatc	796	0	0	0	0	0	0	0	0	18	0	0	0	0	0	12	0	0	0	0	0	0	0	0	0	0	0	0	766	0	0	0	0	0	0	0	0	0
Chaetoceros	0.986842	KC985540	Chaetoceros	Chaetocerotaceae	Chaetocerotales	Mediophyceae	genus	[]	NA	49237	aaatgtaactgctaccactatggaagaagtttacaaacgttcagaatatgctaaagcagtaggttctgtaattatc	453	0	0	0	0	0	0	0	0	0	0	436	0	0	0	0	0	0	0	0	0	0	17	0	0	0	0	0	0	0	0	0	0	0	0	0	0	0
Chaetoceros	0.986842	KC985540	Chaetoceros	Chaetocerotaceae	Chaetocerotales	Mediophyceae	genus	[]	NA	49237	aaatgtaattgctgccactatggaagaagtttacaaacgttcagaatatgctaaagcagtaggttctgtaattatc	431	0	0	0	0	0	0	0	0	0	0	0	0	0	0	0	0	0	431	0	0	0	0	0	0	0	0	0	0	0	0	0	0	0	0	0	0	0
Chaetoceros	1	KC985650	Chaetoceros	Chaetocerotaceae	Chaetocerotales	Mediophyceae	genus	[]	NA	49237	aaacgtaactgctgccactatggaagaagtttacaaacgtgcagaatacgctaaggctgtaggttcagttgtaatc	367	0	0	0	0	0	0	0	0	0	0	0	0	0	0	0	0	0	0	0	367	0	0	0	0	0	0	0	0	0	0	0	0	0	0	0	0	0
Chaetoceros	0.986842	KC985540	Chaetoceros	Chaetocerotaceae	Chaetocerotales	Mediophyceae	genus	[]	NA	49237	aaacgtaactgctgccactatggaagaagtttacaaacgttcagaatatgctaaagcagtaggttctgtaattatc	253	0	0	0	0	0	0	0	11	13	0	0	0	12	0	108	0	0	0	0	0	29	0	11	0	0	0	23	20	0	0	16	0	0	0	10	0	0
Chaetoceros	0.921053	KC985627	Chaetoceros	Chaetocerotaceae	Chaetocerotales	Mediophyceae	genus	['Chaetoceros cf. diadema 2 SEH-2013', 'Chaetoceros cf. diadema 1 SEH-2013']	NA	49237	aaacgtaactgcttccactatggaagaagtttataaacgtgtagaatatgttaagcatgtaggttttgtagtaatt	197	0	0	0	0	0	0	0	0	0	0	0	0	0	0	0	0	0	0	0	0	0	0	0	0	197	0	0	0	0	0	0	0	0	0	0	0	0
Chaetoceros	0.986842	KC985540	Chaetoceros	Chaetocerotaceae	Chaetocerotales	Mediophyceae	genus	[]	NA	49237	aaatgtaactgctgccactatagaagaagtttacaaacgttcagaatatgctaaagcagtaggttctgtaattatc	118	0	35	0	0	83	0	0	0	0	0	0	0	0	0	0	0	0	0	0	0	0	0	0	0	0	0	0	0	0	0	0	0	0	0	0	0	0
Chaetoceros	0.986842	KC985540	Chaetoceros	Chaetocerotaceae	Chaetocerotales	Mediophyceae	genus	[]	NA	49237	aaatgtaactgctgccactatggaagaagtttacaaacgttcaggatatgctaaagcagtaggttctgtaattatc	115	0	0	0	0	0	0	0	0	0	0	0	0	56	0	19	0	0	0	0	15	0	11	0	0	0	0	14	0	0	0	0	0	0	0	0	0	0
Chaetoceros	0.986842	KC985540	Chaetoceros	Chaetocerotaceae	Chaetocerotales	Mediophyceae	genus	[]	NA	49237	aaatgtaactgctgctactatggaagaagtttacaaacgttcagaatatgctaaagcagtaggttctgtaattatc	84	0	0	84	0	0	0	0	0	0	0	0	0	0	0	0	0	0	0	0	0	0	0	0	0	0	0	0	0	0	0	0	0	0	0	0	0	0
Chaetoceros	0.986842	AB430666	Chaetoceros	Chaetocerotaceae	Chaetocerotales	Mediophyceae	genus	[]	NA	49237	aaatgtaactgcttctacaatggaagaagtttacaaacgttcagaatatgctaagcaagttggttctgtagttatc	53	0	0	0	0	0	0	0	0	0	0	0	53	0	0	0	0	0	0	0	0	0	0	0	0	0	0	0	0	0	0	0	0	0	0	0	0	0
Chaetoceros	0.973684	KC969706	Chaetoceros	Chaetocerotaceae	Chaetocerotales	Mediophyceae	genus	['Chaetoceros sp. 7BOF', 'Chaetoceros cf. decipiens 2 SEH-2013']	NA	49237	aaatgtaactgctgccactatggaagaagtttacaaacgtgcagaatatgctaagcaagtaggttctgtagtaatc	40	0	0	0	0	0	0	0	0	0	0	0	0	0	0	40	0	0	0	0	0	0	0	0	0	0	0	0	0	0	0	0	0	0	0	0	0	0
Chaetoceros	0.986842	KC985650	Chaetoceros	Chaetocerotaceae	Chaetocerotales	Mediophyceae	genus	[]	NA	49237	aaacgtaactgctgccactatggaagaagtttacaaacgtgcagaatacgctaaagctgtaggttcagttgtaatc	38	0	0	0	10	0	28	0	0	0	0	0	0	0	0	0	0	0	0	0	0	0	0	0	0	0	0	0	0	0	0	0	0	0	0	0	0	0
Chaetoceros	0.986842	KC985540	Chaetoceros	Chaetocerotaceae	Chaetocerotales	Mediophyceae	genus	[]	NA	49237	aaatgtaactgctgccactatggaagaagtttacaaacgttcagaatatgctaaagaagtaggttctgtaattatc	30	0	0	0	0	0	0	0	0	0	0	0	0	0	0	0	0	0	0	0	15	0	0	0	0	0	0	15	0	0	0	0	0	0	0	0	0	0
Chaetoceros	0.973684	KC985540	Chaetoceros	Chaetocerotaceae	Chaetocerotales	Mediophyceae	genus	[]	NA	49237	aaatgtaactgctgccactatggaagaagtttacaaacgttcagaatatgctaaagcagtaggttctgtagtaatc	21	0	0	0	0	0	0	0	0	0	0	0	0	0	0	21	0	0	0	0	0	0	0	0	0	0	0	0	0	0	0	0	0	0	0	0	0	0
Chaetoceros	0.973684	KC985540	Chaetoceros	Chaetocerotaceae	Chaetocerotales	Mediophyceae	genus	[]	NA	49237	aaacgtaactgctgccactatggaagaagtttacaaacgtgcagaatatgctaaagcagtaggttctgtaattatc	19	0	0	0	0	0	0	0	0	0	0	0	0	0	0	19	0	0	0	0	0	0	0	0	0	0	0	0	0	0	0	0	0	0	0	0	0	0
Chaetoceros	0.986842	KC985540	Chaetoceros	Chaetocerotaceae	Chaetocerotales	Mediophyceae	genus	[]	NA	49237	aaatgtaactgctgccactatggaagaagtttacaaacgttcaaaatatgctaaagcagtaggttctgtaattatc	16	0	0	0	0	0	0	0	0	0	16	0	0	0	0	0	0	0	0	0	0	0	0	0	0	0	0	0	0	0	0	0	0	0	0	0	0	0
Chaetoceros	0.986842	KC985540	Chaetoceros	Chaetocerotaceae	Chaetocerotales	Mediophyceae	genus	[]	NA	49237	aaatgtaactgctgccactatgaaagaagtttacaaacgttcagaatatgctaaagcagtaggttctgtaattatc	16	0	0	0	0	0	0	0	0	0	0	0	0	0	0	0	16	0	0	0	0	0	0	0	0	0	0	0	0	0	0	0	0	0	0	0	0	0
Chaetoceros	0.973684	KC969706	Chaetoceros	Chaetocerotaceae	Chaetocerotales	Mediophyceae	genus	['Chaetoceros cf. diadema 2 SEH-2013', 'Chaetoceros sp. 7BOF', 'Chaetoceros cf. laciniosus 2 SEH-2013', 'Chaetoceros cf. decipiens 2 SEH-2013']	NA	49237	aaacgtaactgctgccactatggaagaagtttacaaacgtgcagaatatgctaagcatgtaggttctgtagtaatc	16	0	0	0	0	0	0	0	0	0	0	0	0	0	0	16	0	0	0	0	0	0	0	0	0	0	0	0	0	0	0	0	0	0	0	0	0	0
Chaetoceros	0.960526	KC969706	Chaetoceros	Chaetocerotaceae	Chaetocerotales	Mediophyceae	genus	['Chaetoceros sp. 7BOF', 'Chaetoceros cf. decipiens 2 SEH-2013']	NA	49237	aaatgtaactgctgccactatggaagaagtttacaaacgttcagaatatgctaagcaagtaggttctgtagtaatc	16	0	0	0	0	0	0	0	0	0	0	0	0	0	0	16	0	0	0	0	0	0	0	0	0	0	0	0	0	0	0	0	0	0	0	0	0	0
Chaetoceros	0.986842	KC985540	Chaetoceros	Chaetocerotaceae	Chaetocerotales	Mediophyceae	genus	[]	NA	49237	aaatgtaactgctgccactatggaagaagtttacaaacgttcagaatatgttaaagcagtaggttctgtaattatc	14	0	0	0	0	14	0	0	0	0	0	0	0	0	0	0	0	0	0	0	0	0	0	0	0	0	0	0	0	0	0	0	0	0	0	0	0	0
Chaetoceros	0.973684	KC985540	Chaetoceros	Chaetocerotaceae	Chaetocerotales	Mediophyceae	genus	[]	NA	49237	aaacgttactgctgccactatggaagaagtttacaaacgttcagaatatgctaaagcagtaggttctgtaattatc	13	0	0	0	0	0	0	0	0	0	0	0	0	0	0	13	0	0	0	0	0	0	0	0	0	0	0	0	0	0	0	0	0	0	0	0	0	0
Chaetoceros	0.960526	KC985540	Chaetoceros	Chaetocerotaceae	Chaetocerotales	Mediophyceae	genus	[]	NA	49237	aaatgtaactgctgccactatggaagaagtttacaaacgttcagaatatgctaaagcagtaggttctatcgttatc	11	0	0	0	0	0	0	0	0	0	0	0	0	0	0	11	0	0	0	0	0	0	0	0	0	0	0	0	0	0	0	0	0	0	0	0	0	0
Chaetoceros	0.973684	KC985540	Chaetoceros	Chaetocerotaceae	Chaetocerotales	Mediophyceae	genus	[]	NA	49237	aaatgtaactgctaccactatggaagaagtttacaaacgttcaggatatgctaaagcagtaggttctgtaattatc	10	0	0	0	0	0	0	0	0	0	0	10	0	0	0	0	0	0	0	0	0	0	0	0	0	0	0	0	0	0	0	0	0	0	0	0	0	0
Chaetoceros atlanticus	0.973684	HQ685849	Chaetoceros	Chaetocerotaceae	Chaetocerotales	Mediophyceae	species	['Chaetoceros atlanticus']	Chaetoceros atlanticus	426624	aaacatcacagcttctacaatggatgagatgattaaacgtgctgattatgctaagcaaatcggttcagtaattatc	3837	0	0	0	39	0	0	150	79	0	0	0	0	0	0	0	14	0	0	50	0	1565	0	0	0	0	0	0	0	0	0	1940	0	0	0	0	0	0
Chaetoceros atlanticus	0.947368	HQ685849	Chaetoceros	Chaetocerotaceae	Chaetocerotales	Mediophyceae	species	['Chaetoceros atlanticus']	Chaetoceros atlanticus	426624	aaacatcacagcttctacaatggatgagatgattaaacgtgctgattatgctaagcaaattggttctgtaattatc	1406	0	0	52	0	0	0	66	13	244	0	0	0	0	749	0	0	0	0	0	0	0	0	63	0	0	192	27	0	0	0	0	0	0	0	0	0	0
Chaetoceros atlanticus	0.960526	HQ685849	Chaetoceros	Chaetocerotaceae	Chaetocerotales	Mediophyceae	species	['Chaetoceros atlanticus']	Chaetoceros atlanticus	426624	aaacatcacagcttctacaatggatgagatgattaaacgtgctgattatgctaagcaaatcgattcagtaattatc	1125	0	0	0	0	0	0	0	0	0	0	0	0	0	0	0	0	0	0	1125	0	0	0	0	0	0	0	0	0	0	0	0	0	0	0	0	0	0
Chaetoceros atlanticus	1	HQ685849	Chaetoceros	Chaetocerotaceae	Chaetocerotales	Mediophyceae	species	['Chaetoceros atlanticus']	Chaetoceros atlanticus	426624	aaacatcacagcttctacaatggatgaaatgattaaacgtgctgattatgctaagcaaatcggttcagtaattatt	221	0	0	0	0	0	32	14	48	57	60	0	0	0	10	0	0	0	0	0	0	0	0	0	0	0	0	0	0	0	0	0	0	0	0	0	0	0
Chaetoceros atlanticus	0.934211	HQ685849	Chaetoceros	Chaetocerotaceae	Chaetocerotales	Mediophyceae	species	['Chaetoceros atlanticus']	Chaetoceros atlanticus	426624	aaacaccacagcttctacaatggatgagatgattaaacgtgctgattatgctaagcaaattggttctgtaattatc	123	0	0	0	0	0	0	0	0	0	0	0	0	0	123	0	0	0	0	0	0	0	0	0	0	0	0	0	0	0	0	0	0	0	0	0	0	0
Chaetoceros atlanticus	0.934211	HQ685849	Chaetoceros	Chaetocerotaceae	Chaetocerotales	Mediophyceae	species	['Chaetoceros atlanticus']	Chaetoceros atlanticus	426624	aaacatcacagcttctacagtggatgagatgattaaacgtgctgattatgctaagcaaattggttctgtaattatc	96	0	0	0	96	0	0	0	0	0	0	0	0	0	0	0	0	0	0	0	0	0	0	0	0	0	0	0	0	0	0	0	0	0	0	0	0	0
Chaetoceros atlanticus	0.960526	HQ685849	Chaetoceros	Chaetocerotaceae	Chaetocerotales	Mediophyceae	species	['Chaetoceros atlanticus']	Chaetoceros atlanticus	426624	aaacatcacagcttttacaatggatgagatgattaaacgtgctgattatgctaagcaaatcggttcagtaattatc	18	0	0	0	0	0	0	0	0	0	0	0	0	0	0	0	0	0	0	0	0	0	0	18	0	0	0	0	0	0	0	0	0	0	0	0	0	0
Chaetoceros atlanticus	0.960526	HQ685849	Chaetoceros	Chaetocerotaceae	Chaetocerotales	Mediophyceae	species	['Chaetoceros atlanticus']	Chaetoceros atlanticus	426624	aaacatcacagcttctacaatgggtgagatgattaaacgtgctgattatgctaagcaaatcggttcagtaattatc	14	0	0	0	0	0	0	0	0	0	0	0	0	0	0	0	0	0	0	0	0	14	0	0	0	0	0	0	0	0	0	0	0	0	0	0	0	0
Chaetoceros cf. contortus 1 SEH-2013	1	KC985527	Chaetoceros	Chaetocerotaceae	Chaetocerotales	Mediophyceae	species	['Chaetoceros cf. contortus 1 SEH-2013']	Chaetoceros cf. contortus 1 SEH-2013	1367185	aaacgtaactgctgccactatggaagaagtttacaaacgttctgagtacgctaagcaagttggttctattgtaatc	383157	0	0	98	0	0	0	0	0	0	0	0	0	0	0	0	0	0	0	0	18	80	0	0	0	542	3164	3363	87879	34571	32002	47273	6636	53827	68956	3712	20188	20848
Chaetoceros cf. contortus 1 SEH-2013	0.986842	KC985527	Chaetoceros	Chaetocerotaceae	Chaetocerotales	Mediophyceae	species	['Chaetoceros cf. contortus 1 SEH-2013']	Chaetoceros cf. contortus 1 SEH-2013	1367185	aaacgtaactgctgccactatggaagaagtttacaaacgttctgagtacgctaagcaagttggttctgttgtaatc	16246	0	0	0	0	0	0	0	0	0	0	0	0	0	0	0	0	257	0	190	313	2281	4802	0	0	2966	3917	0	35	0	0	10	0	12	1442	0	0	21
Chaetoceros cf. contortus 1 SEH-2013	0.986842	KC985527	Chaetoceros	Chaetocerotaceae	Chaetocerotales	Mediophyceae	species	['Chaetoceros cf. contortus 1 SEH-2013']	Chaetoceros cf. contortus 1 SEH-2013	1367185	aaatgtaactgctgccactatggaagaagtttacaaacgttctgagtacgctaagcaagttggttctattgtaatc	4118	0	0	0	0	0	0	0	0	0	0	0	0	0	0	0	0	0	0	0	0	0	0	0	0	0	0	0	52	0	0	30	0	13	35	0	3976	12
Chaetoceros cf. contortus 1 SEH-2013	0.986842	KC985527	Chaetoceros	Chaetocerotaceae	Chaetocerotales	Mediophyceae	species	['Chaetoceros cf. contortus 1 SEH-2013']	Chaetoceros cf. contortus 1 SEH-2013	1367185	aaacgtaactgctgccactatggaagaagtttacaaacgtcctgagtacgctaagcaagttggttctattgtaatc	789	0	0	0	0	0	0	0	0	0	0	0	0	0	0	0	0	0	0	0	0	0	0	0	0	0	0	0	118	33	38	112	0	58	292	0	107	31
Chaetoceros cf. contortus 1 SEH-2013	0.986842	KC985527	Chaetoceros	Chaetocerotaceae	Chaetocerotales	Mediophyceae	species	['Chaetoceros cf. contortus 1 SEH-2013']	Chaetoceros cf. contortus 1 SEH-2013	1367185	aaacgtaactgctgccactatggaagaagtttacaaacgttctgagtatgctaagcaagttggttctattgtaatc	700	0	0	0	0	0	0	0	0	0	0	0	0	0	0	0	0	0	0	0	0	0	0	0	0	0	113	0	46	18	113	16	0	323	59	0	12	0
Chaetoceros cf. contortus 1 SEH-2013	0.986842	KC985527	Chaetoceros	Chaetocerotaceae	Chaetocerotales	Mediophyceae	species	['Chaetoceros cf. contortus 1 SEH-2013']	Chaetoceros cf. contortus 1 SEH-2013	1367185	aaacgtaactgctgccactatggaagaagtttacaaacgttctgagtacgctaagcaagttggttctattgtgatc	559	0	0	0	0	0	0	0	0	0	0	0	0	0	0	0	0	0	0	0	0	0	0	0	0	0	0	0	61	153	15	21	0	229	61	0	0	19
Chaetoceros cf. contortus 1 SEH-2013	0.986842	KC985527	Chaetoceros	Chaetocerotaceae	Chaetocerotales	Mediophyceae	species	['Chaetoceros cf. contortus 1 SEH-2013']	Chaetoceros cf. contortus 1 SEH-2013	1367185	aaacgtaactgctgccactatggaagaagtttacaagcgttctgagtacgctaagcaagttggttctattgtaatc	528	0	0	0	0	0	0	0	0	0	0	0	0	0	0	0	0	0	0	0	0	0	0	0	0	0	0	14	125	63	20	77	0	50	122	0	40	17
Chaetoceros cf. contortus 1 SEH-2013	0.986842	KC985527	Chaetoceros	Chaetocerotaceae	Chaetocerotales	Mediophyceae	species	['Chaetoceros cf. contortus 1 SEH-2013']	Chaetoceros cf. contortus 1 SEH-2013	1367185	aaacgtaactgctgccactatggaagaagtttacaaacgttctgagtacgctaagcgagttggttctattgtaatc	450	0	0	0	0	0	0	0	0	0	0	0	0	0	0	0	0	0	0	0	0	0	0	0	0	0	80	12	115	30	23	41	0	72	66	0	0	11
Chaetoceros cf. contortus 1 SEH-2013	0.986842	KC985527	Chaetoceros	Chaetocerotaceae	Chaetocerotales	Mediophyceae	species	['Chaetoceros cf. contortus 1 SEH-2013']	Chaetoceros cf. contortus 1 SEH-2013	1367185	aaacgtaactgctgccactatggaagaagtttacaaacgttccgagtacgctaagcaagttggttctattgtaatc	412	0	0	0	0	0	0	0	0	0	0	0	0	0	0	0	0	0	0	0	0	0	0	0	0	0	0	0	102	33	35	37	0	50	116	0	16	23
Chaetoceros cf. contortus 1 SEH-2013	0.986842	KC985527	Chaetoceros	Chaetocerotaceae	Chaetocerotales	Mediophyceae	species	['Chaetoceros cf. contortus 1 SEH-2013']	Chaetoceros cf. contortus 1 SEH-2013	1367185	aaacgtaactgctgccactatggaagaagcttacaaacgttctgagtacgctaagcaagttggttctattgtaatc	406	0	0	0	0	0	0	0	0	0	0	0	0	0	0	0	0	0	0	0	0	0	0	0	0	0	0	0	111	50	27	31	0	64	89	0	14	20
Chaetoceros cf. contortus 1 SEH-2013	0.986842	KC985527	Chaetoceros	Chaetocerotaceae	Chaetocerotales	Mediophyceae	species	['Chaetoceros cf. contortus 1 SEH-2013']	Chaetoceros cf. contortus 1 SEH-2013	1367185	aagcgtaactgctgccactatggaagaagtttacaaacgttctgagtacgctaagcaagttggttctattgtaatc	360	0	0	0	0	0	0	0	0	0	0	0	0	0	0	0	0	0	0	0	0	0	0	0	0	0	0	0	75	90	18	36	0	45	85	0	11	0
Chaetoceros cf. contortus 1 SEH-2013	0.986842	KC985527	Chaetoceros	Chaetocerotaceae	Chaetocerotales	Mediophyceae	species	['Chaetoceros cf. contortus 1 SEH-2013']	Chaetoceros cf. contortus 1 SEH-2013	1367185	aaacgtaactgctgccactatggaagaagtttacaaacgttctgagtacactaagcaagttggttctattgtaatc	230	0	0	0	0	0	0	0	0	0	0	0	0	0	0	0	0	0	0	0	0	0	0	0	0	0	0	0	87	12	14	41	0	16	43	0	0	17
Chaetoceros cf. contortus 1 SEH-2013	0.986842	KC985527	Chaetoceros	Chaetocerotaceae	Chaetocerotales	Mediophyceae	species	['Chaetoceros cf. contortus 1 SEH-2013']	Chaetoceros cf. contortus 1 SEH-2013	1367185	aaacgtaactgctgccactatggaagaagtttacaaacgttctgagtacgctaagcaagttggttctattgtaatt	183	0	0	0	0	0	0	0	0	0	0	0	0	0	0	0	0	0	0	0	0	0	0	0	0	0	0	0	44	11	66	40	0	0	22	0	0	0
Chaetoceros cf. contortus 1 SEH-2013	0.986842	KC985527	Chaetoceros	Chaetocerotaceae	Chaetocerotales	Mediophyceae	species	['Chaetoceros cf. contortus 1 SEH-2013']	Chaetoceros cf. contortus 1 SEH-2013	1367185	aaacataactgctgccactatggaagaagtttacaaacgttctgagtacgctaagcaagttggttctattgtaatc	161	0	0	0	0	0	0	0	0	0	0	0	0	0	0	0	0	0	0	0	0	0	0	0	0	0	0	0	42	15	20	31	0	15	38	0	0	0
Chaetoceros cf. contortus 1 SEH-2013	0.986842	KC985527	Chaetoceros	Chaetocerotaceae	Chaetocerotales	Mediophyceae	species	['Chaetoceros cf. contortus 1 SEH-2013']	Chaetoceros cf. contortus 1 SEH-2013	1367185	aaacgtaacttctgccactatggaagaagtttacaaacgttctgagtacgctaagcaagttggttctattgtaatc	137	0	0	0	0	0	0	0	0	0	0	0	0	0	0	0	0	0	0	0	0	0	0	0	0	0	0	0	42	13	16	13	0	25	28	0	0	0
Chaetoceros cf. contortus 1 SEH-2013	0.986842	KC985527	Chaetoceros	Chaetocerotaceae	Chaetocerotales	Mediophyceae	species	['Chaetoceros cf. contortus 1 SEH-2013']	Chaetoceros cf. contortus 1 SEH-2013	1367185	aaacgtaacagctgccactatggaagaagtttacaaacgttctgagtacgctaagcaagttggttctattgtaatc	129	0	0	0	0	0	0	0	0	0	0	0	0	0	0	0	0	0	0	0	0	0	0	0	0	0	0	0	39	14	14	18	0	12	21	0	0	11
Chaetoceros cf. contortus 1 SEH-2013	0.986842	KC985527	Chaetoceros	Chaetocerotaceae	Chaetocerotales	Mediophyceae	species	['Chaetoceros cf. contortus 1 SEH-2013']	Chaetoceros cf. contortus 1 SEH-2013	1367185	aaacgtaactgttgccactatggaagaagtttacaaacgttctgagtacgctaagcaagttggttctattgtaatc	123	0	0	0	0	0	0	0	0	0	0	0	0	0	0	0	0	0	0	0	0	0	0	0	0	0	0	0	41	14	10	10	0	22	26	0	0	0
Chaetoceros cf. contortus 1 SEH-2013	0.986842	KC985527	Chaetoceros	Chaetocerotaceae	Chaetocerotales	Mediophyceae	species	['Chaetoceros cf. contortus 1 SEH-2013']	Chaetoceros cf. contortus 1 SEH-2013	1367185	aaaagtaactgctgccactatggaagaagtttacaaacgttctgagtacgctaagcaagttggttctattgtaatc	123	0	0	0	0	0	0	0	0	0	0	0	0	0	0	0	0	0	0	0	0	0	0	0	0	0	0	0	32	14	0	20	0	36	21	0	0	0
Chaetoceros cf. contortus 1 SEH-2013	0.986842	KC985527	Chaetoceros	Chaetocerotaceae	Chaetocerotales	Mediophyceae	species	['Chaetoceros cf. contortus 1 SEH-2013']	Chaetoceros cf. contortus 1 SEH-2013	1367185	aaacgtaactgctgccactatggaagaagtttataaacgttctgagtacgctaagcaagttggttctattgtaatc	113	0	0	0	0	0	0	0	0	0	0	0	0	0	0	0	0	0	0	0	0	0	0	0	0	0	0	0	31	15	14	11	0	20	22	0	0	0
Chaetoceros cf. contortus 1 SEH-2013	0.986842	KC985527	Chaetoceros	Chaetocerotaceae	Chaetocerotales	Mediophyceae	species	['Chaetoceros cf. contortus 1 SEH-2013']	Chaetoceros cf. contortus 1 SEH-2013	1367185	aaacgtaactgctgccacaatggaagaagtttacaaacgttctgagtacgctaagcaagttggttctattgtaatc	69	0	0	0	0	0	0	0	0	0	0	0	0	0	0	0	0	0	0	0	0	0	0	0	0	0	0	0	17	0	10	12	0	13	17	0	0	0
Chaetoceros cf. contortus 1 SEH-2013	0.986842	KC985527	Chaetoceros	Chaetocerotaceae	Chaetocerotales	Mediophyceae	species	['Chaetoceros cf. contortus 1 SEH-2013']	Chaetoceros cf. contortus 1 SEH-2013	1367185	aaacgtaactgctgccactatggaagaagtttacaatcgttctgagtacgctaagcaagttggttctattgtaatc	62	0	0	0	0	0	0	0	0	0	0	0	0	0	0	0	0	0	0	0	0	0	0	0	0	0	0	0	24	14	0	0	0	10	14	0	0	0
Chaetoceros cf. contortus 1 SEH-2013	0.986842	KC985527	Chaetoceros	Chaetocerotaceae	Chaetocerotales	Mediophyceae	species	['Chaetoceros cf. contortus 1 SEH-2013']	Chaetoceros cf. contortus 1 SEH-2013	1367185	aaacgtaactgcagccactatggaagaagtttacaaacgttctgagtacgctaagcaagttggttctattgtaatc	60	0	0	0	0	0	0	0	0	0	0	0	0	0	0	0	0	0	0	0	0	0	0	0	0	0	0	0	24	0	0	16	0	0	20	0	0	0
Chaetoceros cf. contortus 1 SEH-2013	0.986842	KC985527	Chaetoceros	Chaetocerotaceae	Chaetocerotales	Mediophyceae	species	['Chaetoceros cf. contortus 1 SEH-2013']	Chaetoceros cf. contortus 1 SEH-2013	1367185	aaacgttactgctgccactatggaagaagtttacaaacgttctgagtacgctaagcaagttggttctattgtaatc	55	0	0	0	0	0	0	0	0	0	0	0	0	0	0	0	0	0	0	0	0	0	0	0	0	0	0	0	23	0	10	11	0	0	11	0	0	0
Chaetoceros cf. contortus 1 SEH-2013	0.960526	KC985527	Chaetoceros	Chaetocerotaceae	Chaetocerotales	Mediophyceae	species	['Chaetoceros cf. contortus 1 SEH-2013']	Chaetoceros cf. contortus 1 SEH-2013	1367185	aaacgtaactgctgctacaatggaagaagtttacaaacgttctgagtacgctaagcaagttggttctgttgtaatc	54	0	0	0	0	0	0	0	0	0	0	0	0	0	0	0	0	0	0	0	0	0	0	0	0	54	0	0	0	0	0	0	0	0	0	0	0	0
Chaetoceros cf. contortus 1 SEH-2013	0.973684	KC985527	Chaetoceros	Chaetocerotaceae	Chaetocerotales	Mediophyceae	species	['Chaetoceros cf. contortus 1 SEH-2013']	Chaetoceros cf. contortus 1 SEH-2013	1367185	aaacgtaactgctgctacaatggaagaagtttacaaacgttctgagtacgctaagcaagttggttctattgtaatc	24	0	0	0	0	0	0	0	0	0	0	0	0	0	0	0	0	0	0	0	0	0	0	0	0	10	0	0	0	0	0	0	0	14	0	0	0	0
Chaetoceros cf. contortus 1 SEH-2013	0.973684	KC985527	Chaetoceros	Chaetocerotaceae	Chaetocerotales	Mediophyceae	species	['Chaetoceros cf. contortus 1 SEH-2013']	Chaetoceros cf. contortus 1 SEH-2013	1367185	aaatgtaactgctgccactatggaagaagtttacaaacgttccgagtacgctaagcaagttggttctattgtaatc	24	0	0	0	0	0	0	0	0	0	0	0	0	0	0	0	0	0	0	0	0	0	0	0	0	0	0	0	0	0	0	0	0	0	0	0	24	0
Chaetoceros cf. contortus 1 SEH-2013	0.973684	KC985527	Chaetoceros	Chaetocerotaceae	Chaetocerotales	Mediophyceae	species	['Chaetoceros cf. contortus 1 SEH-2013']	Chaetoceros cf. contortus 1 SEH-2013	1367185	aaacgttacagctgccactatggaagaagtttacaaacgttctgagtacgctaagcaagttggttctattgtaatc	19	0	0	0	0	0	0	0	0	0	0	0	0	0	0	0	0	0	0	0	0	0	0	0	0	0	0	0	0	0	0	19	0	0	0	0	0	0
Chaetoceros cf. contortus 1 SEH-2013	0.973684	KC985527	Chaetoceros	Chaetocerotaceae	Chaetocerotales	Mediophyceae	species	['Chaetoceros cf. contortus 1 SEH-2013']	Chaetoceros cf. contortus 1 SEH-2013	1367185	aaacgtaactgctgccactatggaagaagtttacaaacgctctgagtacgctaagcaagttggttctattgtaacc	14	0	0	0	0	0	0	0	0	0	0	0	0	0	0	0	0	0	0	0	0	0	0	0	0	0	0	0	14	0	0	0	0	0	0	0	0	0
Chaetoceros cf. contortus 1 SEH-2013	0.973684	KC985527	Chaetoceros	Chaetocerotaceae	Chaetocerotales	Mediophyceae	species	['Chaetoceros cf. contortus 1 SEH-2013']	Chaetoceros cf. contortus 1 SEH-2013	1367185	aaacgtagctgctgccactatggaagaagtttacaaacgttctgagtacgctaagcaagttggttctattgtaacc	13	0	0	0	0	0	0	0	0	0	0	0	0	0	0	0	0	0	0	0	0	0	0	0	0	0	0	0	13	0	0	0	0	0	0	0	0	0
Chaetoceros cf. contortus 1 SEH-2013	0.973684	KC985527	Chaetoceros	Chaetocerotaceae	Chaetocerotales	Mediophyceae	species	['Chaetoceros cf. contortus 1 SEH-2013']	Chaetoceros cf. contortus 1 SEH-2013	1367185	aaacgtaaccgctgccactacggaagaagtttacaaacgttctgagtacgctaagcaagttggttctattgtaatc	13	0	0	0	0	0	0	0	0	0	0	0	0	0	0	0	0	0	0	0	0	0	0	0	0	0	0	0	13	0	0	0	0	0	0	0	0	0
Chaetoceros cf. contortus 1 SEH-2013	0.973684	KC985527	Chaetoceros	Chaetocerotaceae	Chaetocerotales	Mediophyceae	species	['Chaetoceros cf. contortus 1 SEH-2013']	Chaetoceros cf. contortus 1 SEH-2013	1367185	aaacgtaactgctgccactatggaggaagtctacaaacgttctgagtacgctaagcaagttggttctattgtaatc	13	0	0	0	0	0	0	0	0	0	0	0	0	0	0	0	0	0	0	0	0	0	0	0	0	0	0	0	0	13	0	0	0	0	0	0	0	0
Chaetoceros cf. contortus 1 SEH-2013	0.960526	KC985527	Chaetoceros	Chaetocerotaceae	Chaetocerotales	Mediophyceae	species	['Chaetoceros cf. contortus 1 SEH-2013']	Chaetoceros cf. contortus 1 SEH-2013	1367185	aaacgttacagctgccactatggaagaagtatacaaacgttctgagtacgctaagcaagttggttctattgtaatc	11	0	0	0	0	0	0	0	0	0	0	0	0	0	0	0	0	0	0	0	0	0	0	0	0	0	0	0	0	0	0	11	0	0	0	0	0	0
Chaetoceros cf. contortus 1 SEH-2013	0.973684	KC985527	Chaetoceros	Chaetocerotaceae	Chaetocerotales	Mediophyceae	species	['Chaetoceros cf. contortus 1 SEH-2013']	Chaetoceros cf. contortus 1 SEH-2013	1367185	aaacgtaactgctgccactatggaagaagtttacaaacgctctgagtacgctaagcaagttggttctgttgtaatc	10	0	0	0	0	0	0	0	0	0	0	0	0	0	0	0	0	0	0	0	0	0	10	0	0	0	0	0	0	0	0	0	0	0	0	0	0	0
Chaetoceros cf. contortus 1 SEH-2013	1	KC985591	Chaetoceros	Chaetocerotaceae	Chaetocerotales	Mediophyceae	species	['Chaetoceros cf. decipiens 1 SEH-2013']	Chaetoceros cf. decipiens 1 SEH-2013	1367189	aaacgtaactgctgccactatggaagaagtttacaaacgtgcagaatatgctaaacaagttggttctgtaattatc	20	0	0	0	0	0	0	0	0	0	0	0	0	0	0	20	0	0	0	0	0	0	0	0	0	0	0	0	0	0	0	0	0	0	0	0	0	0
Chaetoceros cf. decipiens 2 SEH-2013	0.986842	KC985597	Chaetoceros	Chaetocerotaceae	Chaetocerotales	Mediophyceae	species	['Chaetoceros cf. decipiens 2 SEH-2013']	Chaetoceros cf. decipiens 2 SEH-2013	1367190	aaacgtaactgctgccactatggaagaagtttacaaacgtgcagaatatgctaaacaagttggttctgtagtaatc	53035	363	148	1018	1108	128	394	678	1364	711	51	1152	84	813	324	4065	556	168	60	0	6857	0	0	830	0	0	0	0	0	0	0	8613	3088	0	20462	0	0	0
Chaetoceros cf. decipiens 2 SEH-2013	1	KC985597	Chaetoceros	Chaetocerotaceae	Chaetocerotales	Mediophyceae	species	['Chaetoceros cf. decipiens 2 SEH-2013']	Chaetoceros cf. decipiens 2 SEH-2013	1367190	aaacgtaactgctgccactatggaagaagtttacaaacgtgcagaatatgctaagcaagttggttctgtagtaatc	341	0	0	0	0	0	0	0	0	0	0	0	0	0	0	12	0	0	0	0	24	0	0	0	0	0	0	0	0	0	0	0	0	0	34	0	89	182
Chaetoceros cf. decipiens 2 SEH-2013	0.973684	KC985597	Chaetoceros	Chaetocerotaceae	Chaetocerotales	Mediophyceae	species	['Chaetoceros cf. decipiens 2 SEH-2013']	Chaetoceros cf. decipiens 2 SEH-2013	1367190	aaacgtaactgctaccactatggaagaagtttacaaacgtgcagaatatgctaaacaagttggttctgtagtaatc	280	0	0	0	266	0	0	0	0	0	0	0	0	0	0	0	0	0	0	0	0	0	0	0	0	0	0	0	0	0	0	0	0	0	14	0	0	0
Chaetoceros cf. decipiens 2 SEH-2013	0.973684	KC985597	Chaetoceros	Chaetocerotaceae	Chaetocerotales	Mediophyceae	species	['Chaetoceros cf. decipiens 2 SEH-2013']	Chaetoceros cf. decipiens 2 SEH-2013	1367190	aaacgtaactgctgccactatggaagaagtttgcaaacgtgcagaatatgctaaacaagttggttctgtagtaatc	260	0	0	0	0	0	0	0	0	0	0	0	0	0	0	227	0	0	0	0	10	0	0	0	0	0	0	0	0	0	0	0	0	0	23	0	0	0
Chaetoceros cf. decipiens 2 SEH-2013	0.973684	KC985597	Chaetoceros	Chaetocerotaceae	Chaetocerotales	Mediophyceae	species	['Chaetoceros cf. decipiens 2 SEH-2013']	Chaetoceros cf. decipiens 2 SEH-2013	1367190	aaacgtaactgctgtcactatggaagaagtttacaaacgtgcagaatatgctaaacaagttggttctgtagtaatc	117	0	0	0	117	0	0	0	0	0	0	0	0	0	0	0	0	0	0	0	0	0	0	0	0	0	0	0	0	0	0	0	0	0	0	0	0	0
Chaetoceros cf. decipiens 2 SEH-2013	0.973684	KC985597	Chaetoceros	Chaetocerotaceae	Chaetocerotales	Mediophyceae	species	['Chaetoceros cf. decipiens 2 SEH-2013']	Chaetoceros cf. decipiens 2 SEH-2013	1367190	aaacgtaactgctgccactatggaagaagtttacaaacgtgtagaatatgctaaacaagttggttctgtagtaatc	112	98	0	0	0	0	0	0	0	0	0	0	0	0	0	0	0	0	0	0	0	0	0	0	0	0	0	0	0	0	0	0	0	0	14	0	0	0
Chaetoceros cf. decipiens 2 SEH-2013	0.973684	KC985597	Chaetoceros	Chaetocerotaceae	Chaetocerotales	Mediophyceae	species	['Chaetoceros cf. decipiens 2 SEH-2013']	Chaetoceros cf. decipiens 2 SEH-2013	1367190	aaacgtaactgctgccactatggaagaagcttacaaacgtgcagaatatgctaaacaagttggttctgtagtaatc	47	0	0	0	0	0	0	0	0	0	0	0	0	0	0	0	0	0	0	0	0	0	0	0	0	0	0	0	0	0	0	0	0	0	47	0	0	0
Chaetoceros cf. decipiens 2 SEH-2013	0.973684	KC985597	Chaetoceros	Chaetocerotaceae	Chaetocerotales	Mediophyceae	species	['Chaetoceros cf. decipiens 2 SEH-2013']	Chaetoceros cf. decipiens 2 SEH-2013	1367190	aaacgtaactgctgccactatggaagaagtttacaaacgtgcagaatatgctaaacaagctggttctgtagtaatc	35	0	0	0	0	0	0	0	0	0	0	0	0	0	0	0	0	0	0	0	0	0	0	0	0	0	0	0	0	0	0	11	0	0	24	0	0	0
Chaetoceros cf. decipiens 2 SEH-2013	0.973684	KC985597	Chaetoceros	Chaetocerotaceae	Chaetocerotales	Mediophyceae	species	['Chaetoceros cf. decipiens 2 SEH-2013']	Chaetoceros cf. decipiens 2 SEH-2013	1367190	aaacgtaactgctgccactatggaagaagtttacaaacgtgcagaatgtgctaaacaagttggttctgtagtaatc	35	0	0	0	0	0	0	0	0	0	0	0	0	0	0	16	0	0	0	0	0	0	0	0	0	0	0	0	0	0	0	0	0	0	19	0	0	0
Chaetoceros cf. decipiens 2 SEH-2013	0.973684	KC985597	Chaetoceros	Chaetocerotaceae	Chaetocerotales	Mediophyceae	species	['Chaetoceros cf. decipiens 2 SEH-2013']	Chaetoceros cf. decipiens 2 SEH-2013	1367190	aaacgtaactgctgccactatggaagaagtttacaaacgtgcaaaatatgctaaacaagttggttctgtagtaatc	31	0	0	0	0	0	0	0	0	0	0	0	0	0	0	0	0	0	21	0	0	0	0	0	0	0	0	0	0	0	0	0	0	0	10	0	0	0
Chaetoceros cf. decipiens 2 SEH-2013	0.973684	KC985597	Chaetoceros	Chaetocerotaceae	Chaetocerotales	Mediophyceae	species	['Chaetoceros cf. decipiens 2 SEH-2013']	Chaetoceros cf. decipiens 2 SEH-2013	1367190	aaacgtaactgctgccactatggaagaagtttacaaacgtgcagaatatgctaaacaagttggttctgtggtaatc	26	0	0	0	0	0	0	0	0	0	0	0	0	0	0	0	0	0	0	0	0	0	0	0	0	0	0	0	0	0	0	0	0	0	26	0	0	0
Chaetoceros cf. decipiens 2 SEH-2013	0.960526	KC985597	Chaetoceros	Chaetocerotaceae	Chaetocerotales	Mediophyceae	species	['Chaetoceros cf. decipiens 2 SEH-2013']	Chaetoceros cf. decipiens 2 SEH-2013	1367190	aaatgtaactgctgccactatggaagaagtttacaaacgttcagaatatgctaaacaagttggttctgtagtaatc	20	0	0	0	0	0	0	0	0	0	0	0	0	0	0	20	0	0	0	0	0	0	0	0	0	0	0	0	0	0	0	0	0	0	0	0	0	0
Chaetoceros cf. decipiens 2 SEH-2013	0.973684	KC985597	Chaetoceros	Chaetocerotaceae	Chaetocerotales	Mediophyceae	species	['Chaetoceros cf. decipiens 2 SEH-2013']	Chaetoceros cf. decipiens 2 SEH-2013	1367190	aaacgtaattgctgccactatggaagaagtttacaaacgtgcagaatatgctaaacaagttggttctgtagtaatc	12	0	0	0	0	0	0	0	0	0	0	0	0	0	0	0	0	0	0	0	0	0	0	0	0	0	0	0	0	0	0	0	0	0	12	0	0	0
Chaetoceros cf. decipiens 2 SEH-2013	0.973684	KC985597	Chaetoceros	Chaetocerotaceae	Chaetocerotales	Mediophyceae	species	['Chaetoceros cf. decipiens 2 SEH-2013']	Chaetoceros cf. decipiens 2 SEH-2013	1367190	aaacgtaactgctgccactatggaagaagtttacaaacgtacagaatatgctaaacaagttggttctgtagtaatc	11	0	0	0	0	0	0	0	0	0	0	0	0	0	0	0	0	0	0	0	0	0	0	0	0	0	0	0	0	0	0	0	0	0	11	0	0	0
Chaetoceros cf. diadema 1 SEH-2013	1	KC985615	Chaetoceros	Chaetocerotaceae	Chaetocerotales	Mediophyceae	species	['Chaetoceros cf. diadema 1 SEH-2013']	Chaetoceros cf. diadema 1 SEH-2013	1367191	aaacgtaactgcttctactatggaagaagtttacaaacgtgcagaatatgctaaaactgttggttctgtaatcatc	3045	0	0	0	0	0	0	0	0	0	0	0	0	0	0	0	0	0	0	0	3045	0	0	0	0	0	0	0	0	0	0	0	0	0	0	0	0	0
Chaetoceros cf. diadema 2 SEH-2013	1	KC985627	Chaetoceros	Chaetocerotaceae	Chaetocerotales	Mediophyceae	species	['Chaetoceros cf. diadema 2 SEH-2013']	Chaetoceros cf. diadema 2 SEH-2013	1367192	aaacgtaactgcttctactatggaagaagtttacaaacgtgcagaatatgctaagcatgtaggttctgtagtaatc	4833	0	0	0	134	0	0	678	672	609	227	0	47	324	270	529	13	26	0	0	83	0	0	0	0	0	1067	154	0	0	0	0	0	0	0	0	0	0
Chaetoceros cf. diadema 2 SEH-2013	0.934211	KC985627	Chaetoceros	Chaetocerotaceae	Chaetocerotales	Mediophyceae	species	['Chaetoceros cf. diadema 2 SEH-2013']	Chaetoceros cf. diadema 2 SEH-2013	1367192	aaacgtaactgcttctactatggaagaagtttataaacgtgtagaatatgttaagcatgtaggttttgtagtaatt	424	0	0	0	0	0	0	0	0	0	0	0	0	0	0	0	0	0	0	0	0	0	0	0	0	424	0	0	0	0	0	0	0	0	0	0	0	0
Chaetoceros cf. diadema 2 SEH-2013	0.986842	KC985627	Chaetoceros	Chaetocerotaceae	Chaetocerotales	Mediophyceae	species	['Chaetoceros cf. diadema 2 SEH-2013']	Chaetoceros cf. diadema 2 SEH-2013	1367192	aaacgtaactgcttctactatgaaagaagtttacaaacgtgcagaatatgctaagcatgtaggttctgtagtaatc	183	0	0	0	0	0	0	0	0	0	0	0	0	0	0	0	0	0	0	0	0	0	183	0	0	0	0	0	0	0	0	0	0	0	0	0	0	0
Chaetoceros cf. diadema 2 SEH-2013	0.986842	KC985627	Chaetoceros	Chaetocerotaceae	Chaetocerotales	Mediophyceae	species	['Chaetoceros cf. diadema 2 SEH-2013']	Chaetoceros cf. diadema 2 SEH-2013	1367192	aaacgtaactgcttctactatggaagaagtttacaaacgtgcaaaatatgctaagcatgtaggttctgtagtaatc	43	0	0	0	0	0	0	0	0	43	0	0	0	0	0	0	0	0	0	0	0	0	0	0	0	0	0	0	0	0	0	0	0	0	0	0	0	0
Chaetoceros cf. diadema 2 SEH-2013	0.986842	KC985627	Chaetoceros	Chaetocerotaceae	Chaetocerotales	Mediophyceae	species	['Chaetoceros cf. diadema 2 SEH-2013']	Chaetoceros cf. diadema 2 SEH-2013	1367192	aaacgtaactgcttctactatggaagaagtttacaaacgtgcagaatatgttaagcatgtaggttctgtagtaatc	11	0	0	0	0	0	0	0	0	0	0	0	0	0	0	11	0	0	0	0	0	0	0	0	0	0	0	0	0	0	0	0	0	0	0	0	0	0
Chaetoceros cf. pseudobrevis 1 SEH-2013	1	KC985654	Chaetoceros	Chaetocerotaceae	Chaetocerotales	Mediophyceae	species	['Chaetoceros cf. pseudobrevis 1 SEH-2013']	Chaetoceros cf. pseudobrevis 1 SEH-2013	1367197	aaatgtaactgctgccactatggaagaagtttacaaacgtgcagaatatgctaaagtagttggttctgtagttatc	57816	168	0	0	294	0	0	66	673	427	0	0	0	0	18	0	0	0	0	0	0	0	136	0	0	0	0	0	0	0	0	4836	1392	0	2253	0	0	47553
Chaetoceros cf. pseudobrevis 1 SEH-2013	0.986842	KC985654	Chaetoceros	Chaetocerotaceae	Chaetocerotales	Mediophyceae	species	['Chaetoceros cf. pseudobrevis 1 SEH-2013']	Chaetoceros cf. pseudobrevis 1 SEH-2013	1367197	aaatgtaactgctgccactatggaagaagtttacaaacgtgcagaatatgccaaagtagttggttctgtagttatc	4177	0	0	0	0	0	0	64	432	201	0	648	0	0	0	0	24	113	60	20	0	0	601	18	32	483	0	0	0	0	0	0	0	0	444	0	1001	36
Chaetoceros cf. pseudobrevis 1 SEH-2013	0.986842	KC985654	Chaetoceros	Chaetocerotaceae	Chaetocerotales	Mediophyceae	species	['Chaetoceros cf. pseudobrevis 1 SEH-2013']	Chaetoceros cf. pseudobrevis 1 SEH-2013	1367197	aaatgtaactgctgccactatggaagaagtttacaaacgtgcagaatatgctaaagtaattggttctgtagttatc	656	0	0	0	0	0	0	0	0	641	0	0	0	0	0	0	0	0	0	0	0	0	0	0	0	0	0	0	0	0	0	0	0	0	0	0	0	15
Chaetoceros cf. pseudobrevis 1 SEH-2013	0.973684	KC985654	Chaetoceros	Chaetocerotaceae	Chaetocerotales	Mediophyceae	species	['Chaetoceros cf. pseudobrevis 1 SEH-2013']	Chaetoceros cf. pseudobrevis 1 SEH-2013	1367197	aaatgtaactactgccactatggaagaagtttacaaacgtgcagaatatgccaaagtagttggttctgtagttatc	369	0	0	0	0	0	0	0	369	0	0	0	0	0	0	0	0	0	0	0	0	0	0	0	0	0	0	0	0	0	0	0	0	0	0	0	0	0
Chaetoceros cf. pseudobrevis 1 SEH-2013	0.986842	KC985654	Chaetoceros	Chaetocerotaceae	Chaetocerotales	Mediophyceae	species	['Chaetoceros cf. pseudobrevis 1 SEH-2013']	Chaetoceros cf. pseudobrevis 1 SEH-2013	1367197	aaatgtaaccgctgccactatggaagaagtttacaaacgtgcagaatatgctaaagtagttggttctgtagttatc	287	0	0	0	0	0	0	0	0	0	0	0	0	0	0	0	0	0	0	0	0	0	0	0	0	0	0	0	0	0	0	0	0	0	212	0	0	75
Chaetoceros cf. pseudobrevis 1 SEH-2013	0.986842	KC985654	Chaetoceros	Chaetocerotaceae	Chaetocerotales	Mediophyceae	species	['Chaetoceros cf. pseudobrevis 1 SEH-2013']	Chaetoceros cf. pseudobrevis 1 SEH-2013	1367197	aaatgtaactgctgccactatggaagaagtctacaaacgtgcagaatatgctaaagtagttggttctgtagttatc	69	0	0	0	0	0	0	0	0	0	0	0	0	0	0	0	0	0	0	0	0	0	0	0	0	0	0	0	0	0	0	0	0	0	0	0	0	69
Chaetoceros cf. pseudobrevis 1 SEH-2013	0.986842	KC985654	Chaetoceros	Chaetocerotaceae	Chaetocerotales	Mediophyceae	species	['Chaetoceros cf. pseudobrevis 1 SEH-2013']	Chaetoceros cf. pseudobrevis 1 SEH-2013	1367197	aaacgtaactgctgccactatggaagaagtttacaaacgtgcagaatatgctaaagtagttggttctgtagttatc	60	0	0	0	0	0	0	0	0	0	0	0	0	0	0	0	0	0	0	0	0	0	0	0	0	0	0	0	0	0	0	27	0	0	0	0	0	33
Chaetoceros cf. pseudobrevis 1 SEH-2013	0.986842	KC985654	Chaetoceros	Chaetocerotaceae	Chaetocerotales	Mediophyceae	species	['Chaetoceros cf. pseudobrevis 1 SEH-2013']	Chaetoceros cf. pseudobrevis 1 SEH-2013	1367197	aaatgtaactgctgccactatggaagaagtttacaaacgtgcagaatatgctaaagtagttggttccgtagttatc	58	0	0	0	0	0	0	0	0	0	0	0	0	0	0	0	0	0	0	0	0	0	0	0	0	0	0	0	0	0	0	0	0	0	0	0	0	58
Chaetoceros cf. pseudobrevis 1 SEH-2013	0.986842	KC985654	Chaetoceros	Chaetocerotaceae	Chaetocerotales	Mediophyceae	species	['Chaetoceros cf. pseudobrevis 1 SEH-2013']	Chaetoceros cf. pseudobrevis 1 SEH-2013	1367197	aaatgtaactgctgccactatggaagaagtttacaaacgtgcagaatatgctaaagtagttggttctgtagtcatc	37	0	0	0	0	0	0	0	0	0	0	0	0	0	0	0	0	0	0	0	0	0	0	0	0	0	0	0	0	0	0	0	0	0	0	0	0	37
Chaetoceros cf. pseudobrevis 1 SEH-2013	0.986842	KC985654	Chaetoceros	Chaetocerotaceae	Chaetocerotales	Mediophyceae	species	['Chaetoceros cf. pseudobrevis 1 SEH-2013']	Chaetoceros cf. pseudobrevis 1 SEH-2013	1367197	aaatgtaactgctgccactatggaagaagtttacaaacgttcagaatatgctaaagtagttggttctgtagttatc	34	0	0	0	0	0	0	0	0	0	0	0	0	0	0	0	0	0	0	0	0	0	0	0	0	0	0	0	0	0	0	0	0	0	0	0	0	34
Chaetoceros cf. pseudobrevis 1 SEH-2013	0.986842	KC985654	Chaetoceros	Chaetocerotaceae	Chaetocerotales	Mediophyceae	species	['Chaetoceros cf. pseudobrevis 1 SEH-2013']	Chaetoceros cf. pseudobrevis 1 SEH-2013	1367197	aaatgtaactactgccactatggaagaagtttacaaacgtgcagaatatgctaaagtagttggttctgtagttatc	28	17	0	0	0	0	0	0	0	0	0	0	0	0	0	0	0	0	0	0	0	0	0	0	0	0	0	0	0	0	0	0	0	0	0	0	0	11
Chaetoceros cf. pseudobrevis 1 SEH-2013	0.986842	KC985654	Chaetoceros	Chaetocerotaceae	Chaetocerotales	Mediophyceae	species	['Chaetoceros cf. pseudobrevis 1 SEH-2013']	Chaetoceros cf. pseudobrevis 1 SEH-2013	1367197	aaatgtaactgctgccactatggaagaagtttacaaacgtgcagaatatgctaaagtagttggttctgtagttata	26	0	0	0	0	0	0	0	0	0	0	0	0	0	0	0	0	0	0	0	0	0	0	0	0	0	0	0	0	0	0	0	0	0	0	0	0	26
Chaetoceros cf. pseudobrevis 1 SEH-2013	0.986842	KC985654	Chaetoceros	Chaetocerotaceae	Chaetocerotales	Mediophyceae	species	['Chaetoceros cf. pseudobrevis 1 SEH-2013']	Chaetoceros cf. pseudobrevis 1 SEH-2013	1367197	aaatgtaactgctgccactatagaagaagtttacaaacgtgcagaatatgctaaagtagttggttctgtagttatc	22	0	0	0	0	0	0	0	0	0	0	0	0	0	0	0	0	0	0	0	0	0	0	0	0	0	0	0	0	0	0	0	0	0	0	0	0	22
Chaetoceros cf. pseudobrevis 1 SEH-2013	0.986842	KC985654	Chaetoceros	Chaetocerotaceae	Chaetocerotales	Mediophyceae	species	['Chaetoceros cf. pseudobrevis 1 SEH-2013']	Chaetoceros cf. pseudobrevis 1 SEH-2013	1367197	aaatgtaactgctgccactatggaagaagtttacaaacatgcagaatatgctaaagtagttggttctgtagttatc	19	0	0	0	0	0	0	0	0	0	0	0	0	0	0	0	0	0	0	0	0	0	0	0	0	0	0	0	0	0	0	0	0	0	0	0	0	19
Chaetoceros cf. pseudobrevis 1 SEH-2013	0.986842	KC985654	Chaetoceros	Chaetocerotaceae	Chaetocerotales	Mediophyceae	species	['Chaetoceros cf. pseudobrevis 1 SEH-2013']	Chaetoceros cf. pseudobrevis 1 SEH-2013	1367197	aaatgtaactgctgccactatggaagaagtttacaaacgtgcagaatatgctaaagtagttggttctgaagttatc	17	0	0	0	0	0	0	0	0	0	0	0	0	0	0	0	0	0	0	0	0	0	0	0	0	0	0	0	0	0	0	0	0	0	0	0	0	17
Chaetoceros cf. pseudobrevis 1 SEH-2013	0.986842	KC985654	Chaetoceros	Chaetocerotaceae	Chaetocerotales	Mediophyceae	species	['Chaetoceros cf. pseudobrevis 1 SEH-2013']	Chaetoceros cf. pseudobrevis 1 SEH-2013	1367197	aaatgtaactgctgccactatggaagaagtttacaaacgtgcagaatatgctaaagtagtaggttctgtagttatc	16	0	0	0	0	0	0	0	0	0	0	0	0	0	0	0	0	0	0	0	0	0	0	0	0	0	0	0	0	0	0	0	0	0	0	0	0	16
Chaetoceros cf. pseudobrevis 1 SEH-2013	0.986842	KC985654	Chaetoceros	Chaetocerotaceae	Chaetocerotales	Mediophyceae	species	['Chaetoceros cf. pseudobrevis 1 SEH-2013']	Chaetoceros cf. pseudobrevis 1 SEH-2013	1367197	aaatgtaactgctgccactatggaagaagtttacaaacgtgcagaatatgctaaagtagttggttctgtagttatt	15	0	0	0	0	0	0	0	0	0	0	0	0	0	0	0	0	0	0	0	0	0	0	0	0	0	0	0	0	0	0	0	0	0	0	0	0	15
Chaetoceros cf. pseudobrevis 1 SEH-2013	0.986842	KC985654	Chaetoceros	Chaetocerotaceae	Chaetocerotales	Mediophyceae	species	['Chaetoceros cf. pseudobrevis 1 SEH-2013']	Chaetoceros cf. pseudobrevis 1 SEH-2013	1367197	aaatgtaactgctgccactatggaagaagtttacaaacgtgctgaatatgctaaagtagttggttctgtagttatc	14	0	0	0	0	0	0	0	0	0	0	0	0	0	0	0	0	0	0	0	0	0	0	0	0	0	0	0	0	0	0	0	0	0	0	0	0	14
Chaetoceros cf. pseudobrevis 1 SEH-2013	0.986842	KC985654	Chaetoceros	Chaetocerotaceae	Chaetocerotales	Mediophyceae	species	['Chaetoceros cf. pseudobrevis 1 SEH-2013']	Chaetoceros cf. pseudobrevis 1 SEH-2013	1367197	aaatgtaactgctgccactaaggaagaagtttacaaacgtgcagaatatgctaaagtagttggttctgtagttatc	14	0	0	0	0	0	0	0	0	0	0	0	0	0	0	0	0	0	0	0	0	0	0	0	0	0	0	0	0	0	0	0	0	0	0	0	0	14
Chaetoceros cf. pseudobrevis 1 SEH-2013	0.935065	KC985654	Chaetoceros	Chaetocerotaceae	Chaetocerotales	Mediophyceae	species	['Chaetoceros cf. pseudobrevis 1 SEH-2013']	Chaetoceros cf. pseudobrevis 1 SEH-2013	1367197	aaatgtaactgctgccactatggaagaagtttacaaacgttcagaatatgctaaagctattggttctgtagttgtt	10	0	0	0	0	0	0	0	0	0	0	0	0	0	0	10	0	0	0	0	0	0	0	0	0	0	0	0	0	0	0	0	0	0	0	0	0	0
Chaetoceros cf. pseudobrevis 2 SEH-2013	1	KC985660	Chaetoceros	Chaetocerotaceae	Chaetocerotales	Mediophyceae	species	['Chaetoceros cf. pseudobrevis 2 SEH-2013']	Chaetoceros cf. pseudobrevis 2 SEH-2013	1367198	aaatgtaactgctgccactatggaagaagtttacaaacgtgcagaatatgctaaaacagttggttctgttgttatc	68	0	0	0	0	0	0	21	0	0	0	0	0	0	0	0	0	0	0	0	0	0	0	0	0	0	0	0	0	0	0	0	0	0	0	0	47	0
Chaetoceros cf. pseudobrevis 2 SEH-2013	0.986842	KC985660	Chaetoceros	Chaetocerotaceae	Chaetocerotales	Mediophyceae	species	['Chaetoceros cf. pseudobrevis 2 SEH-2013']	Chaetoceros cf. pseudobrevis 2 SEH-2013	1367198	aaatgtaactgctgccactatagaagaagtttacaaacgtgcagaatatgctaaaacagttggttctgttgttatc	14	0	0	0	0	14	0	0	0	0	0	0	0	0	0	0	0	0	0	0	0	0	0	0	0	0	0	0	0	0	0	0	0	0	0	0	0	0
Chaetoceros constrictus	0.960526	KC985525	Chaetoceros	Chaetocerotaceae	Chaetocerotales	Mediophyceae	species	['Chaetoceros constrictus']	Chaetoceros constrictus	1366900	aaacgtaacagctgcaacaatggaagaagtgtacaaacgtgctgagtacgctaaagaagttggttctgtagttatc	9617	0	0	0	0	0	0	0	0	0	0	77	0	0	0	0	0	0	0	0	9245	295	0	0	0	0	0	0	0	0	0	0	0	0	0	0	0	0
Chaetoceros constrictus	1	KC985525	Chaetoceros	Chaetocerotaceae	Chaetocerotales	Mediophyceae	species	['Chaetoceros constrictus']	Chaetoceros constrictus	1366900	aaacgtaacagcagcaactatggaagaagtgtacaaacgtgctgagtacgctaaacaagttggttctgtagttatc	24	0	0	0	0	0	0	24	0	0	0	0	0	0	0	0	0	0	0	0	0	0	0	0	0	0	0	0	0	0	0	0	0	0	0	0	0	0
Chaetoceros constrictus	0.947368	KC985525	Chaetoceros	Chaetocerotaceae	Chaetocerotales	Mediophyceae	species	['Chaetoceros constrictus']	Chaetoceros constrictus	1366900	aaacgtaacagctgcaacaatggaagaagtgtacaaacgtgctgagtacgctaaagaggttggttctgtagttatc	13	0	0	0	0	0	0	0	0	0	0	0	0	0	0	0	0	0	0	0	13	0	0	0	0	0	0	0	0	0	0	0	0	0	0	0	0	0
Chaetoceros dayaensis	0.986842	KM407459	Chaetoceros	Chaetocerotaceae	Chaetocerotales	Mediophyceae	species	['Chaetoceros dayaensis']	Chaetoceros dayaensis	1573537	aaacgtaactgctgccactatggaagaagtttacaaacgtgcagaatatgctaagcaagtaggttctgtaattatc	16	0	0	0	0	0	0	0	0	0	0	0	0	0	0	16	0	0	0	0	0	0	0	0	0	0	0	0	0	0	0	0	0	0	0	0	0	0
Chaetoceros didymus	1	HQ710593	Chaetoceros	Chaetocerotaceae	Chaetocerotales	Mediophyceae	species	['Chaetoceros didymus']	Chaetoceros didymus	49238	aaatgtaactgctgccactatggaagaagtttacaaacgtgctgagtatgctaaacaaattggttctgttattatc	12	0	0	0	0	0	0	0	0	0	0	0	0	0	0	0	0	12	0	0	0	0	0	0	0	0	0	0	0	0	0	0	0	0	0	0	0	0
Chaetoceros similis	1	KC985663	Chaetoceros	Chaetocerotaceae	Chaetocerotales	Mediophyceae	species	['Chaetoceros similis']	Chaetoceros similis	1366869	aaacgtaactgctgccactatggaagaagtttacaaacgtgcagaatatgctaaggttgttggttctgttgtaatc	1080	0	0	0	374	0	0	0	0	0	0	0	330	0	0	0	0	0	376	0	0	0	0	0	0	0	0	0	0	0	0	0	0	0	0	0	0	0
Chaetoceros simplex	0.973684	KC985664	Chaetoceros	Chaetocerotaceae	Chaetocerotales	Mediophyceae	species	['Chaetoceros simplex']	Chaetoceros simplex	156587	aaacgtaactgcttctactatgaaaaaagtttacaaacgtgcagaatatgctaaacacgttggttctgttgtaatc	8721	0	0	0	0	0	0	0	0	0	0	0	0	0	0	0	0	0	0	0	0	0	0	0	0	0	0	8721	0	0	0	0	0	0	0	0	0	0
Chaetoceros socialis	0.986842	FJ002154	Chaetoceros	Chaetocerotaceae	Chaetocerotales	Mediophyceae	species	['Chaetoceros socialis']	Chaetoceros socialis	163503	aaacgtaactgctgctacaatggaagaagtttacaaacgttctgagtacgctaagcaagttggttctgtaattatc	73098	907	911	3578	2309	671	735	4253	6910	10869	53	0	359	92	379	0	11	89	0	387	573	0	0	454	1890	3749	0	0	435	0	0	0	0	28043	0	99	1911	3431
Chaetoceros socialis	0.934211	FJ002154	Chaetoceros	Chaetocerotaceae	Chaetocerotales	Mediophyceae	species	['Chaetoceros socialis']	Chaetoceros socialis	163503	aaatgtaactgcagcaacaatggaagaagtgtacaaacgttctgagtacgctaagcaagttggttctgtaattatc	31015	0	0	0	0	0	0	0	0	0	0	0	0	0	0	0	0	0	0	0	0	0	0	0	0	0	0	0	0	0	0	0	0	0	0	1924	0	29091
Chaetoceros socialis	0.960526	FJ002154	Chaetoceros	Chaetocerotaceae	Chaetocerotales	Mediophyceae	species	['Chaetoceros socialis']	Chaetoceros socialis	163503	aaacgtaactgctgctacaatggaagaagtttacaaacgttctgagtatgctaagcaagttggttcagtaattatc	16705	295	147	45	650	251	161	12	24	183	120	844	210	56	632	0	22	526	263	742	0	244	123	176	1188	417	246	0	0	0	0	0	0	3070	0	357	0	5701
Chaetoceros socialis	0.973684	FJ002154	Chaetoceros	Chaetocerotaceae	Chaetocerotales	Mediophyceae	species	['Chaetoceros socialis']	Chaetoceros socialis	163503	aaacgtaactgctgctacaatggaagaagtttacaaacgttctgagtacgctaagcaaattggttctgtaattatc	1075	0	0	0	0	0	0	0	0	10	0	1065	0	0	0	0	0	0	0	0	0	0	0	0	0	0	0	0	0	0	0	0	0	0	0	0	0	0
Chaetoceros socialis	0.973684	FJ002154	Chaetoceros	Chaetocerotaceae	Chaetocerotales	Mediophyceae	species	['Chaetoceros socialis']	Chaetoceros socialis	163503	aaacgtaactgctgctacaatggaagaagtttacaagcgttctgagtacgctaagcaagttggttctgtaattatc	335	0	0	0	0	0	0	0	0	11	0	0	0	0	0	0	0	0	0	0	0	0	0	0	298	0	0	0	0	0	0	0	0	26	0	0	0	0
Chaetoceros socialis	0.960526	FJ002154	Chaetoceros	Chaetocerotaceae	Chaetocerotales	Mediophyceae	species	['Chaetoceros socialis']	Chaetoceros socialis	163503	aaacgtaactgctgctacaatggaagaagtttacaaacgtgctgagtacgctaagcaaattggttctgtaattatc	237	0	0	0	0	0	0	0	0	0	0	0	0	0	0	0	0	0	0	0	0	0	0	32	205	0	0	0	0	0	0	0	0	0	0	0	0	0
Chaetoceros socialis	0.947368	FJ002154	Chaetoceros	Chaetocerotaceae	Chaetocerotales	Mediophyceae	species	['Chaetoceros socialis']	Chaetoceros socialis	163503	aaacgtaactgctgctacaatggaagaaatttacaaacgttctgagtatgctaagcaagttggttcagtaattatc	194	0	0	0	0	0	0	0	0	0	0	0	0	0	0	0	0	0	0	0	194	0	0	0	0	0	0	0	0	0	0	0	0	0	0	0	0	0
Chaetoceros socialis	0.973684	FJ002154	Chaetoceros	Chaetocerotaceae	Chaetocerotales	Mediophyceae	species	['Chaetoceros socialis']	Chaetoceros socialis	163503	aaacgtaactgctgctacaatggaagaagtttacaaacgttctgagtacgctaaacaagttggttctgtaattatc	182	0	0	0	182	0	0	0	0	0	0	0	0	0	0	0	0	0	0	0	0	0	0	0	0	0	0	0	0	0	0	0	0	0	0	0	0	0
Chaetoceros socialis	0.973684	FJ002154	Chaetoceros	Chaetocerotaceae	Chaetocerotales	Mediophyceae	species	['Chaetoceros socialis']	Chaetoceros socialis	163503	aaacgtaactgctgctacaatggaagaagtttgcaaacgttctgagtacgctaagcaagttggttctgtaattatc	152	0	56	0	0	0	0	0	12	0	0	0	0	0	0	0	0	0	0	0	0	0	0	0	0	52	0	0	0	0	0	0	0	32	0	0	0	0
Chaetoceros socialis	0.973684	FJ002154	Chaetoceros	Chaetocerotaceae	Chaetocerotales	Mediophyceae	species	['Chaetoceros socialis']	Chaetoceros socialis	163503	aaacgtaactgctgctacaatggaagaagtttacaaacgttctgagtacgttaagcaagttggttctgtaattatc	88	88	0	0	0	0	0	0	0	0	0	0	0	0	0	0	0	0	0	0	0	0	0	0	0	0	0	0	0	0	0	0	0	0	0	0	0	0
Chaetoceros socialis	0.947368	FJ002154	Chaetoceros	Chaetocerotaceae	Chaetocerotales	Mediophyceae	species	['Chaetoceros socialis']	Chaetoceros socialis	163503	aaacgtaactgttgctacaatggaagaagtttacaaacgttctgagtatgctaagcaagttggttcagtaattatc	80	80	0	0	0	0	0	0	0	0	0	0	0	0	0	0	0	0	0	0	0	0	0	0	0	0	0	0	0	0	0	0	0	0	0	0	0	0
Chaetoceros socialis	0.986842	FJ002154	Chaetoceros	Chaetocerotaceae	Chaetocerotales	Mediophyceae	species	['Chaetoceros socialis']	Chaetoceros socialis	163503	aaacgtaactgctgctacgatggaagaagtttacaaacgttctgagtacgctaagcaagttggttctgtaattatc	75	0	0	0	0	0	0	0	0	21	0	0	0	0	0	0	0	0	0	0	0	0	0	0	0	0	0	0	0	0	0	0	0	54	0	0	0	0
Chaetoceros socialis	0.973684	FJ002154	Chaetoceros	Chaetocerotaceae	Chaetocerotales	Mediophyceae	species	['Chaetoceros socialis']	Chaetoceros socialis	163503	aaacgtaactgctgctacaatggaagaagtttacaaacgttctaagtacgctaagcaagttggttctgtaattatc	69	12	0	0	36	0	0	0	0	0	0	0	0	0	0	0	0	0	0	0	0	0	0	0	0	0	0	0	0	0	0	0	0	21	0	0	0	0
Chaetoceros socialis	0.960526	FJ002154	Chaetoceros	Chaetocerotaceae	Chaetocerotales	Mediophyceae	species	['Chaetoceros socialis']	Chaetoceros socialis	163503	aaacgtaactgctgctacaatagaagaagtctacaaacgttctgagtacgctaagcaagttggttctgtaattatc	65	0	0	0	65	0	0	0	0	0	0	0	0	0	0	0	0	0	0	0	0	0	0	0	0	0	0	0	0	0	0	0	0	0	0	0	0	0
Chaetoceros socialis	0.986842	FJ002154	Chaetoceros	Chaetocerotaceae	Chaetocerotales	Mediophyceae	species	['Chaetoceros socialis']	Chaetoceros socialis	163503	aaacgtaactgctgccactatggaagaagtttacaaacgttctgagtacgctaagcaagttggttctgtaattatc	61	0	0	0	0	0	0	0	0	0	0	0	0	0	0	0	0	0	0	0	0	0	0	0	0	49	0	0	0	0	0	0	0	12	0	0	0	0
Chaetoceros socialis	0.973684	FJ002154	Chaetoceros	Chaetocerotaceae	Chaetocerotales	Mediophyceae	species	['Chaetoceros socialis']	Chaetoceros socialis	163503	aaacgtaactgctgctacaatggaagaagttcacaaacgttctgagtacgctaagcaagttggttctgtaattatc	53	34	0	0	0	0	0	0	0	0	0	0	0	0	0	0	0	0	0	0	0	0	0	0	0	0	0	0	0	0	0	0	0	19	0	0	0	0
Chaetoceros socialis	0.973684	FJ002154	Chaetoceros	Chaetocerotaceae	Chaetocerotales	Mediophyceae	species	['Chaetoceros socialis']	Chaetoceros socialis	163503	aaacgtaactgctgctacaatggaagaagtttacaaacgttccgagtacgctaagcaagttggttctgtaattatc	48	0	0	12	0	0	0	0	0	10	0	0	0	0	0	0	0	0	0	0	0	0	0	0	0	0	0	0	0	0	0	0	0	26	0	0	0	0
Chaetoceros socialis	0.973684	FJ002154	Chaetoceros	Chaetocerotaceae	Chaetocerotales	Mediophyceae	species	['Chaetoceros socialis']	Chaetoceros socialis	163503	aaacgtaactgctgctacaatggaagaagtttacaaatgttctgagtacgctaagcaagttggttctgtaattatc	42	0	0	0	0	42	0	0	0	0	0	0	0	0	0	0	0	0	0	0	0	0	0	0	0	0	0	0	0	0	0	0	0	0	0	0	0	0
Chaetoceros socialis	0.947368	FJ002154	Chaetoceros	Chaetocerotaceae	Chaetocerotales	Mediophyceae	species	['Chaetoceros socialis']	Chaetoceros socialis	163503	aaacgtaactgctgctacaatgaaagaagtttacaaacgttctgagtatgctaagcaagttggttcagtaattatc	41	0	0	0	41	0	0	0	0	0	0	0	0	0	0	0	0	0	0	0	0	0	0	0	0	0	0	0	0	0	0	0	0	0	0	0	0	0
Chaetoceros socialis	0.947368	FJ002154	Chaetoceros	Chaetocerotaceae	Chaetocerotales	Mediophyceae	species	['Chaetoceros socialis']	Chaetoceros socialis	163503	aaacgtaactgctactacaatggaagaagtttacaaacgttctgagtatgctaagcaagttggttcagtaattatc	40	0	0	0	0	0	0	0	40	0	0	0	0	0	0	0	0	0	0	0	0	0	0	0	0	0	0	0	0	0	0	0	0	0	0	0	0	0
Chaetoceros socialis	0.973684	FJ002154	Chaetoceros	Chaetocerotaceae	Chaetocerotales	Mediophyceae	species	['Chaetoceros socialis']	Chaetoceros socialis	163503	aaatgtaactgctgctacaatggaagaagtttacaaacgttctgagtacgctaagcaagttggttctgtaattatc	36	0	0	0	21	0	0	0	0	15	0	0	0	0	0	0	0	0	0	0	0	0	0	0	0	0	0	0	0	0	0	0	0	0	0	0	0	0
Chaetoceros socialis	0.973684	FJ002154	Chaetoceros	Chaetocerotaceae	Chaetocerotales	Mediophyceae	species	['Chaetoceros socialis']	Chaetoceros socialis	163503	aaacgtaactgctgctacaatggaagaagtttacaaacgttctgagtacgctaagcaagttggttctgtaatcatc	35	0	0	0	0	0	0	0	10	10	0	0	0	0	0	0	0	0	0	0	0	0	0	0	0	0	0	0	0	0	0	0	0	15	0	0	0	0
Chaetoceros socialis	0.973684	FJ002154	Chaetoceros	Chaetocerotaceae	Chaetocerotales	Mediophyceae	species	['Chaetoceros socialis']	Chaetoceros socialis	163503	aaacgtaactgctgctacaatggaagaagtttacaaacgttctgagtatgctaagcaagttggttctgtaattatc	32	0	0	0	0	0	0	0	0	0	0	0	0	0	0	0	0	0	0	0	0	0	0	0	0	0	0	0	0	0	0	0	0	32	0	0	0	0
Chaetoceros socialis	0.973684	FJ002154	Chaetoceros	Chaetocerotaceae	Chaetocerotales	Mediophyceae	species	['Chaetoceros socialis']	Chaetoceros socialis	163503	aaacgtaactgctgctacaatggaagaagtttacaaacgttctgagcacgctaagcaagttggttctgtaattatc	28	0	0	0	0	0	0	0	0	10	0	0	0	0	0	0	0	0	0	0	0	0	0	0	0	0	0	0	0	0	0	0	0	18	0	0	0	0
Chaetoceros socialis	0.947368	FJ002154	Chaetoceros	Chaetocerotaceae	Chaetocerotales	Mediophyceae	species	['Chaetoceros socialis']	Chaetoceros socialis	163503	aaacgtaactgctgctacaatggaagaagtttacaaacgttctgagtatgttaagcaagttggttcagtaattatc	25	0	0	0	0	0	0	0	0	0	0	0	25	0	0	0	0	0	0	0	0	0	0	0	0	0	0	0	0	0	0	0	0	0	0	0	0	0
Chaetoceros socialis	0.973684	FJ002154	Chaetoceros	Chaetocerotaceae	Chaetocerotales	Mediophyceae	species	['Chaetoceros socialis']	Chaetoceros socialis	163503	aaacgtaactgctgctacaatggaagaagtttacaaacgttttgagtacgctaagcaagttggttctgtaattatc	23	0	0	0	0	0	0	0	0	0	0	0	0	0	0	0	0	0	0	0	0	0	0	0	0	0	0	0	0	0	0	0	0	23	0	0	0	0
Chaetoceros socialis	0.947368	FJ002154	Chaetoceros	Chaetocerotaceae	Chaetocerotales	Mediophyceae	species	['Chaetoceros socialis']	Chaetoceros socialis	163503	aaacgtaactgctgctacaatggaagaagtttacaaacgttctgagtacgctaagcaagttggttctgtagttgtt	22	0	0	12	0	0	0	0	0	0	0	0	0	0	0	0	0	0	0	0	0	0	0	0	0	10	0	0	0	0	0	0	0	0	0	0	0	0
Chaetoceros socialis	0.960526	FJ002154	Chaetoceros	Chaetocerotaceae	Chaetocerotales	Mediophyceae	species	['Chaetoceros socialis']	Chaetoceros socialis	163503	aaacgtaactgcagctacaatggaagaagtttacaaacgtgctgagtacgctaagcaagttggttctgtaattatc	21	0	0	0	0	0	0	0	21	0	0	0	0	0	0	0	0	0	0	0	0	0	0	0	0	0	0	0	0	0	0	0	0	0	0	0	0	0
Chaetoceros socialis	0.960526	FJ002154	Chaetoceros	Chaetocerotaceae	Chaetocerotales	Mediophyceae	species	['Chaetoceros socialis']	Chaetoceros socialis	163503	aaacgttacagctgctacaatggaagaagtttacaaacgttctgagtacgctaagcaagttggttctgtaattatc	20	0	0	0	0	0	0	0	20	0	0	0	0	0	0	0	0	0	0	0	0	0	0	0	0	0	0	0	0	0	0	0	0	0	0	0	0	0
Chaetoceros socialis	0.973684	FJ002154	Chaetoceros	Chaetocerotaceae	Chaetocerotales	Mediophyceae	species	['Chaetoceros socialis']	Chaetoceros socialis	163503	aaacgtaactgctgctacaatggaagaagtttacaaacgttctgagtaagctaagcaagttggttctgtaattatc	17	0	0	0	0	0	0	0	0	0	0	0	0	0	0	0	0	0	0	0	0	0	0	0	0	0	0	0	0	0	0	0	0	17	0	0	0	0
Chaetoceros socialis	0.973684	FJ002154	Chaetoceros	Chaetocerotaceae	Chaetocerotales	Mediophyceae	species	['Chaetoceros socialis']	Chaetoceros socialis	163503	aaacgtaactgctgctacaatggaagaagtttacaaacgttctgagtacgctaagcaagttggttttgtaattatc	16	0	0	0	0	0	0	0	16	0	0	0	0	0	0	0	0	0	0	0	0	0	0	0	0	0	0	0	0	0	0	0	0	0	0	0	0	0
Chaetoceros socialis	0.973684	FJ002154	Chaetoceros	Chaetocerotaceae	Chaetocerotales	Mediophyceae	species	['Chaetoceros socialis']	Chaetoceros socialis	163503	aaacataactgctgctacaatggaagaagtttacaaacgttctgagtacgctaagcaagttggttctgtaattatc	15	0	0	0	0	0	0	0	0	0	0	0	0	0	0	0	0	0	0	0	0	0	0	0	0	0	0	0	0	0	0	0	0	15	0	0	0	0
Chaetoceros socialis	0.947368	FJ002154	Chaetoceros	Chaetocerotaceae	Chaetocerotales	Mediophyceae	species	['Chaetoceros socialis']	Chaetoceros socialis	163503	aaacgtaactgctgctacaatggaagaagtttacaaacgttttgagtatgctaagcaagttggttcagtaattatc	14	0	0	14	0	0	0	0	0	0	0	0	0	0	0	0	0	0	0	0	0	0	0	0	0	0	0	0	0	0	0	0	0	0	0	0	0	0
Chaetoceros socialis	0.973684	FJ002154	Chaetoceros	Chaetocerotaceae	Chaetocerotales	Mediophyceae	species	['Chaetoceros socialis']	Chaetoceros socialis	163503	aaacgtaactgctgctacaatagaagaagtttacaaacgttctgagtacgctaagcaagttggttctgtaattatc	13	0	0	0	0	0	0	0	0	0	0	0	0	0	0	0	0	0	0	0	0	0	0	0	0	0	0	0	0	0	0	0	0	13	0	0	0	0
Chaetoceros socialis	0.960526	FJ002154	Chaetoceros	Chaetocerotaceae	Chaetocerotales	Mediophyceae	species	['Chaetoceros socialis']	Chaetoceros socialis	163503	aaacgtaattgttgctacaatggaagaagtttacaaacgttctgagtacgctaagcaagttggttctgtaattatc	13	0	0	0	0	13	0	0	0	0	0	0	0	0	0	0	0	0	0	0	0	0	0	0	0	0	0	0	0	0	0	0	0	0	0	0	0	0
Chaetoceros socialis	0.922078	FJ002154	Chaetoceros	Chaetocerotaceae	Chaetocerotales	Mediophyceae	species	['Chaetoceros socialis']	Chaetoceros socialis	163503	aaatgtaactgcagtaacaatggaagaagtgtacaaacgttctgagtacgctaagcaagttggttctgtaattatc	11	0	0	0	0	0	0	0	0	0	0	0	0	0	0	0	0	0	0	0	0	0	0	0	0	0	0	0	0	0	0	0	0	0	0	0	0	11
Chaetoceros socialis	0.947368	FJ002154	Chaetoceros	Chaetocerotaceae	Chaetocerotales	Mediophyceae	species	['Chaetoceros socialis']	Chaetoceros socialis	163503	aaacgtaactgctgctacaatggaaggagtttacaaacgttctgagtatgctaagcaagttggttcagtaattatc	11	0	11	0	0	0	0	0	0	0	0	0	0	0	0	0	0	0	0	0	0	0	0	0	0	0	0	0	0	0	0	0	0	0	0	0	0	0
Chaetoceros socialis	0.934211	FJ002154	Chaetoceros	Chaetocerotaceae	Chaetocerotales	Mediophyceae	species	['Chaetoceros socialis']	Chaetoceros socialis	163503	aaacgtaactgctgctacaatggaagaagtctataaacgttctgagtatgctaagcaagttggttcagtaattatc	11	0	0	0	0	0	0	0	0	0	0	0	0	0	11	0	0	0	0	0	0	0	0	0	0	0	0	0	0	0	0	0	0	0	0	0	0	0
Chaetoceros socialis	0.973684	FJ002154	Chaetoceros	Chaetocerotaceae	Chaetocerotales	Mediophyceae	species	['Chaetoceros socialis']	Chaetoceros socialis	163503	aaacgtaacagctgctacaatggaagaagtttacaaacgttctgagtacgctaagcaagttggttctgtaattatc	10	0	0	0	0	0	0	0	0	0	0	0	0	0	0	0	0	0	0	0	0	0	0	0	0	0	0	0	0	0	0	0	0	10	0	0	0	0
Chaetoceros sp. 14BOF	1	KC969704	Chaetoceros	Chaetocerotaceae	Chaetocerotales	Mediophyceae	species	['Chaetoceros sp. 14BOF']	Chaetoceros sp. 14BOF	1366280	aaacgtaactgcagcaactatggaagaagtatacaaacgttctgagtatgctaaaacggttggttcagtagtaatc	3774	301	14	0	380	100	90	189	577	158	0	0	0	0	0	0	0	565	0	0	0	46	0	0	1354	0	0	0	0	0	0	0	0	0	0	0	0	0
Chaetoceros sp. 14BOF	0.986842	KC969704	Chaetoceros	Chaetocerotaceae	Chaetocerotales	Mediophyceae	species	['Chaetoceros sp. 14BOF']	Chaetoceros sp. 14BOF	1366280	aaacgtaactgcagcaactatggaagaagtatacaaacgttctgaatatgctaaaacggttggttcagtagtaatc	300	300	0	0	0	0	0	0	0	0	0	0	0	0	0	0	0	0	0	0	0	0	0	0	0	0	0	0	0	0	0	0	0	0	0	0	0	0
Chaetoceros sp. 14BOF	0.986842	KC969704	Chaetoceros	Chaetocerotaceae	Chaetocerotales	Mediophyceae	species	['Chaetoceros sp. 14BOF']	Chaetoceros sp. 14BOF	1366280	aaacgtaactgcagcaactatggaagaagtatacaaacgttctgagtatgctaaaacggttggttcagtggtaatc	284	0	0	0	0	0	0	0	0	0	0	0	0	0	0	0	0	0	0	0	0	0	0	0	284	0	0	0	0	0	0	0	0	0	0	0	0	0
Chaetoceros sp. 14BOF	0.986842	KC969704	Chaetoceros	Chaetocerotaceae	Chaetocerotales	Mediophyceae	species	['Chaetoceros sp. 14BOF']	Chaetoceros sp. 14BOF	1366280	aaacgtaactgcagcaactatggaagaagtatacaaacattctgagtatgctaaaacggttggttcagtagtaatc	132	0	0	0	132	0	0	0	0	0	0	0	0	0	0	0	0	0	0	0	0	0	0	0	0	0	0	0	0	0	0	0	0	0	0	0	0	0
Chaetoceros sp. 7BOF	1	KC969706	Chaetoceros	Chaetocerotaceae	Chaetocerotales	Mediophyceae	species	['Chaetoceros sp. 7BOF']	Chaetoceros sp. 7BOF	1366282	aaacgtaactgctgccactatggaagaagtttacaagcgtgcagaatatgctaagcaagtaggttctgtagtaatc	8847	11	0	0	0	0	0	52	53	138	14	0	0	74	0	144	0	0	0	0	26	0	0	0	0	0	0	1157	0	0	0	0	0	0	0	91	0	7087
Chaetoceros sp. 7BOF	0.986842	KC969706	Chaetoceros	Chaetocerotaceae	Chaetocerotales	Mediophyceae	species	['Chaetoceros sp. 7BOF']	Chaetoceros sp. 7BOF	1366282	aaacgtaactgctgccactctggaagaagtttacaagcgtgcagaatatgctaagcaagtaggttctgtagtaatc	950	0	0	0	0	0	0	0	0	0	0	0	0	0	0	0	0	0	0	0	0	0	0	0	0	0	0	950	0	0	0	0	0	0	0	0	0	0
Chaetoceros teres	1	KC985684	Chaetoceros	Chaetocerotaceae	Chaetocerotales	Mediophyceae	species	['Chaetoceros teres']	Chaetoceros teres	1366867	aaacattactgcggcaacaatggaagaagtatacaaacgtgctgagtatgctaaacaagttggttctgtagttgta	7750	0	33	0	0	0	0	0	0	0	0	0	0	210	0	0	0	15	73	0	0	0	0	0	0	0	0	0	1945	0	0	200	0	5274	0	0	0	0
Chaetoceros teres	0.986842	KC985684	Chaetoceros	Chaetocerotaceae	Chaetocerotales	Mediophyceae	species	['Chaetoceros teres']	Chaetoceros teres	1366867	aaacattactgcggcaacaatggaagaagtatacaaacgtgctgagtatgctaaacaagttggttctgtaattgta	371	0	0	0	371	0	0	0	0	0	0	0	0	0	0	0	0	0	0	0	0	0	0	0	0	0	0	0	0	0	0	0	0	0	0	0	0	0
Chaetoceros teres	0.986842	KC985684	Chaetoceros	Chaetocerotaceae	Chaetocerotales	Mediophyceae	species	['Chaetoceros teres']	Chaetoceros teres	1366867	aaacattactgcggcaacaatggaagaagtatataaacgtgctgagtatgctaaacaagttggttctgtagttgta	93	0	0	0	0	0	0	0	0	0	0	0	0	0	0	0	0	0	0	0	0	0	0	0	0	0	0	0	0	0	0	93	0	0	0	0	0	0
Chordaria flagelliformis	1	AB066073	Chordaria	Chordariaceae	Ectocarpales	Phaeophyceae	species	['Chordaria flagelliformis']	Chordaria flagelliformis	3026	aaatattactgctgcaactatggaacaaatgtatgaacgtgcggaatatgcgcattcaattggttcagttattgtg	49	0	0	0	0	0	0	0	0	0	0	0	0	0	0	0	0	0	49	0	0	0	0	0	0	0	0	0	0	0	0	0	0	0	0	0	0	0
Chordariaceae	1	AF055414	NA	Chordariaceae	Ectocarpales	Phaeophyceae	family	[]	NA	66220	aaacattactgctgcaactatggaagaaatgtatgaacgtgcagaatatgcacattcaatcggttcagttattgtg	8299	0	0	0	0	0	0	0	0	0	0	0	0	0	0	0	0	0	0	0	0	0	0	0	0	0	0	0	0	0	0	0	0	0	8299	0	0	0
Chordariaceae	0.986842	AB066065	NA	Chordariaceae	Ectocarpales	Phaeophyceae	family	['Striaria attenuata', 'Heterosaundersella hattoriana', 'Tinocladia crassa', 'Chordaria sp. Kamchatka_5', 'Halothrix lumbricalis', 'Leptonematella fasciculata', 'Cladosiphon zosterae', 'Sphaerotrichia divaricata', 'Eudesme virescens', 'Dictyosiphon foeniculaceus']	NA	66220	aaacattactgctgcaactatggaacaaatgtatgaacgtgcagaatatgcacattcaattggttcagttattgtg	652	0	0	0	0	0	0	0	0	0	0	0	0	0	0	0	0	0	0	0	0	0	0	0	0	0	0	0	0	0	0	0	0	0	652	0	0	0
Chordariaceae	0.986842	AF207802	NA	Chordariaceae	Ectocarpales	Phaeophyceae	family	['Protectocarpus speciosus', 'Stictyosiphon soriferus', 'Myrionema balticum']	NA	66220	aaacattactgctgcaactatggaagaaatgtatgaacgtgcagaatatgctcatgcaattggttctgttattgtg	14	0	0	0	0	0	0	0	0	0	0	0	0	0	0	0	0	0	0	0	0	0	0	0	0	0	0	0	0	0	0	0	0	14	0	0	0	0
Corethron	1	KC309600	Corethron	Corethraceae	Corethrales	Coscinodiscophyceae	genus	[]	NA	49242	aaacattacagctggtactatggaagaagtttacaagcgtgctgagtacgctaaaactgtaggttctgtaattgta	301	0	0	0	0	0	0	0	0	0	0	0	0	0	0	0	0	0	0	0	0	0	0	0	0	0	0	0	0	0	0	0	0	0	301	0	0	0
Coscinodiscophyceae	0.960526	DQ514795	NA	NA	NA	Coscinodiscophyceae	class	['Thalassiosira sp. 10BOF', 'Thalassiosira sp. 11BOF', 'Thalassiosira decipiens', 'Thalassiosira minuscula', 'Thalassiosira sundarbana', 'Thalassiosira antarctica', 'Cyclostephanos invisitatus', 'Thalassiosira sp. 1 SEH-2013', 'Lindavia radiosa', 'Thalassiosira angulata']	NA	33836	aaacgttacagctgccactatggaagaagtatacaaacgtgctgagtatgctaaagctattggttctgtagttgtt	1895	71	48	165	162	66	74	18	13	16	30	95	249	118	41	178	28	27	14	57	0	0	15	29	94	55	0	0	0	0	0	131	0	16	22	41	0	22
Coscinodiscophyceae	0.935897	AB831882	NA	NA	NA	Coscinodiscophyceae	class	['Cyclostephanos dubius', 'Thalassiosira nodulolineata', 'Lindavia radiosa', 'Cyclostephanos invisitatus', 'Cyclostephanos tholiformis', 'Discostella stelligera']	NA	33836	aaacatcacggctgctacgatggaagaaacgtacaaacgtgctgagtatgctaaagcaatcggttctgtagttgtt	48	0	48	0	0	0	0	0	0	0	0	0	0	0	0	0	0	0	0	0	0	0	0	0	0	0	0	0	0	0	0	0	0	0	0	0	0	0
Coscinodiscophyceae	0.960526	DQ514795	NA	NA	NA	Coscinodiscophyceae	class	['Thalassiosira sp. 10BOF', 'Thalassiosira sp. 11BOF', 'Thalassiosira decipiens', 'Thalassiosira minuscula', 'Thalassiosira sundarbana', 'Thalassiosira antarctica', 'Cyclostephanos invisitatus', 'Thalassiosira nordenskioeldii', 'Lindavia radiosa', 'Thalassiosira angulata', 'Detonula pumila']	NA	33836	aaacgttactgctgctactatggaagaagtatacaaacgtgctgagtatgctaaagctattggttctgtagttgtt	39	0	0	0	0	0	0	0	0	0	0	0	0	0	0	39	0	0	0	0	0	0	0	0	0	0	0	0	0	0	0	0	0	0	0	0	0	0
Cylindrotheca	0.986842	KC969721	Cylindrotheca	Bacillariaceae	Bacillariales	Bacillariophyceae	genus	['Cylindrotheca closterium', 'Cylindrotheca sp. 2BOF', 'Cylindrotheca sp. 3BOF']	NA	2852	aaacgttactgcagctactatggaagaagtatacaaacgttctgagtatgctaaagaagtaggttctatcgttatc	14348	14	170	0	0	111	89	197	413	0	82	488	19	0	0	1306	489	1288	2883	0	0	0	0	662	0	287	0	0	0	0	0	0	0	5850	0	0	0	0
Cylindrotheca	0.986842	JX971017	Cylindrotheca	Bacillariaceae	Bacillariales	Bacillariophyceae	genus	[]	NA	2852	aaacgttactgcggctactatggaagaagtatacaaacgttctgagtatgctaaagaagtaggttcgattgttatc	11335	0	0	0	0	0	0	0	0	0	0	0	0	0	0	0	0	0	0	0	0	0	0	0	0	0	662	8518	0	0	0	0	0	0	833	0	1322	0
Cylindrotheca	0.986842	KC969715	Cylindrotheca	Bacillariaceae	Bacillariales	Bacillariophyceae	genus	['Cylindrotheca closterium', 'Cylindrotheca sp. 1BOF', 'Cylindrotheca sp. 2BOF', 'Cylindrotheca sp. 3BOF']	NA	2852	aaacgttactgctgctactatggaagaagtatacaaacgtgctgagtatgctaaagaagtaggttctatcgttatc	2436	0	0	0	0	0	33	51	250	199	0	0	0	0	0	1879	0	0	24	0	0	0	0	0	0	0	0	0	0	0	0	0	0	0	0	0	0	0
Cylindrotheca	0.973684	KP400288	Cylindrotheca	Bacillariaceae	Bacillariales	Bacillariophyceae	genus	['Cylindrotheca closterium', 'Cylindrotheca sp. 2BOF']	NA	2852	aaacgttactgctgctactatggaagaagtatacaaacgtgctgagtatgctaaagaaataggttcgatcgttatc	1900	0	0	0	0	0	0	0	0	0	0	0	0	0	0	0	0	0	0	0	0	0	64	0	0	0	0	0	0	0	0	1836	0	0	0	0	0	0
Cylindrotheca	0.986842	KP400288	Cylindrotheca	Bacillariaceae	Bacillariales	Bacillariophyceae	genus	['Cylindrotheca closterium', 'Cylindrotheca sp. 2BOF']	NA	2852	aaacgttactgctgctactatggaagaagtatacaaacgtgctgagtatgctaaagaagtaggttcgatcgttatc	1031	0	0	0	0	0	0	105	0	107	0	0	0	0	0	0	44	0	112	0	0	0	0	0	0	0	0	0	0	0	0	645	0	0	18	0	0	0
Cylindrotheca	0.986842	KC969715	Cylindrotheca	Bacillariaceae	Bacillariales	Bacillariophyceae	genus	['Cylindrotheca closterium', 'Cylindrotheca sp. 1BOF', 'Cylindrotheca sp. 2BOF', 'Cylindrotheca sp. 3BOF']	NA	2852	aaacgttactgctgctactatggaagaagtatataaacgttctgagtatgctaaagaagtaggttctatcgttatc	810	0	0	135	604	0	0	0	0	0	0	0	0	0	0	0	0	0	0	0	0	0	0	0	0	71	0	0	0	0	0	0	0	0	0	0	0	0
Cylindrotheca	0.973684	KP400288	Cylindrotheca	Bacillariaceae	Bacillariales	Bacillariophyceae	genus	['Cylindrotheca closterium', 'Cylindrotheca sp. 2BOF']	NA	2852	aaacgttactgctgctactatggaagaagtatacaaacgtgctgagtatgctaaagaagtgggttcgatcgttatc	525	0	0	0	0	0	0	0	0	0	0	0	0	0	0	0	0	0	525	0	0	0	0	0	0	0	0	0	0	0	0	0	0	0	0	0	0	0
Cylindrotheca	0.934211	JX970999	Cylindrotheca	Bacillariaceae	Bacillariales	Bacillariophyceae	genus	['Cylindrotheca closterium', 'Cylindrotheca sp. 2BOF', 'Cylindrotheca sp. 3BOF', 'Cylindrotheca closterium lineage V', 'Cylindrotheca sp. lineage IV']	NA	2852	aaatgttactgctgcgacaatggaagaaatctacaaacgttcagagtatgcgaaagaagtaggttctatcgttatt	303	0	0	0	0	0	303	0	0	0	0	0	0	0	0	0	0	0	0	0	0	0	0	0	0	0	0	0	0	0	0	0	0	0	0	0	0	0
Cylindrotheca	0.986842	KP400288	Cylindrotheca	Bacillariaceae	Bacillariales	Bacillariophyceae	genus	['Cylindrotheca closterium', 'Cylindrotheca sp. 2BOF']	NA	2852	aaacgttactgctgctactatggaagaagtatacaaacgttctgagtatgctaaagaagtaggttcgattgttatc	172	0	0	0	0	0	0	77	0	0	0	0	0	0	0	0	0	0	0	0	0	0	0	95	0	0	0	0	0	0	0	0	0	0	0	0	0	0
Cylindrotheca	0.973684	KP400288	Cylindrotheca	Bacillariaceae	Bacillariales	Bacillariophyceae	genus	['Cylindrotheca closterium', 'Cylindrotheca sp. 2BOF']	NA	2852	aaacgttactgctgccactatggaagaagtatacaaacgtgctgagtatgctaaagaagtaggttcgatcgttatc	85	0	0	0	0	0	0	0	0	0	0	0	0	0	0	0	0	0	0	0	0	0	0	0	0	0	0	0	85	0	0	0	0	0	0	0	0	0
Cylindrotheca	0.986842	KC969721	Cylindrotheca	Bacillariaceae	Bacillariales	Bacillariophyceae	genus	['Cylindrotheca closterium', 'Cylindrotheca sp. 2BOF', 'Cylindrotheca sp. 3BOF']	NA	2852	aaacgttacttctgctactatggaagaagtatacaaacgttctgagtatgctaaagaagtaggttctatcgttatc	19	0	0	0	0	0	0	0	0	0	0	0	0	0	0	19	0	0	0	0	0	0	0	0	0	0	0	0	0	0	0	0	0	0	0	0	0	0
Cylindrotheca	0.973684	KP400288	Cylindrotheca	Bacillariaceae	Bacillariales	Bacillariophyceae	genus	['Cylindrotheca closterium', 'Cylindrotheca sp. 2BOF']	NA	2852	aaacgttactgctgctactatggaagaagtatgcaaacgttctgagtatgctaaagaagtaggttcgattgttatc	14	0	0	0	0	0	0	0	0	14	0	0	0	0	0	0	0	0	0	0	0	0	0	0	0	0	0	0	0	0	0	0	0	0	0	0	0	0
Cylindrotheca	0.948052	JX971017	Cylindrotheca	Bacillariaceae	Bacillariales	Bacillariophyceae	genus	['Cylindrotheca closterium']	NA	2852	aaacgttacaggtgctactatggaagaagtgtacaaacgttctgagtatgctaaagaagtaggttctattgttatc	12	0	0	0	0	0	0	0	0	0	0	0	0	0	0	0	0	12	0	0	0	0	0	0	0	0	0	0	0	0	0	0	0	0	0	0	0	0
Cylindrotheca closterium	1	KP400288	Cylindrotheca	Bacillariaceae	Bacillariales	Bacillariophyceae	species	['Cylindrotheca closterium']	Cylindrotheca closterium	2856	aaacgttactgctgctactatggaagaagtatacaaacgttctgagtatgctaaagaagtaggttcgatcgttatc	2104	0	0	0	0	0	0	0	0	0	0	0	0	0	0	0	0	0	0	0	0	0	1348	0	0	0	0	0	0	0	0	0	0	756	0	0	0	0
Cymatosiraceae	0.960526	HQ912487	NA	Cymatosiraceae	Cymatosirales	Mediophyceae	family	['Plagiogrammopsis vanheurckii']	NA	49244	aaacgtaacagctgcaacaatggaagaagtgtacaaacgtgctgagtacgctaaagaagttggttctgtaatcatc	62279	13	90	703	1387	56	15	0	0	1878	0	0	0	0	36	0	434	70	2136	799	7335	591	290	1387	7084	859	0	1432	50	0	0	0	0	0	8625	27009	0	0
Cymatosiraceae	0.947368	HQ912487	NA	Cymatosiraceae	Cymatosirales	Mediophyceae	family	['Plagiogrammopsis vanheurckii']	NA	49244	aaacgtaacagctgcaacaatggaagaagtgtataaacgtgctgagtacgctaaagaagttggttctgtaatcatc	123	0	0	0	123	0	0	0	0	0	0	0	0	0	0	0	0	0	0	0	0	0	0	0	0	0	0	0	0	0	0	0	0	0	0	0	0	0
Cymatosiraceae	0.947368	HQ912487	NA	Cymatosiraceae	Cymatosirales	Mediophyceae	family	['Plagiogrammopsis vanheurckii']	NA	49244	aaacgtaacagctgcaacaatggaagaagtgtacaaacgtgctgagtacgctaaggaagttggttctgtaatcatc	107	0	0	0	0	0	0	0	0	0	0	0	0	0	0	0	0	0	0	0	18	0	0	0	15	0	0	0	0	0	0	0	0	0	21	53	0	0
Cymatosiraceae	0.947368	HQ912487	NA	Cymatosiraceae	Cymatosirales	Mediophyceae	family	['Plagiogrammopsis vanheurckii']	NA	49244	aaacgtaacagctgcaacaatgggagaagtgtacaaacgtgctgagtacgctaaagaagttggttctgtaatcatc	81	0	0	0	0	0	0	0	0	0	0	0	0	0	0	0	0	0	0	0	22	0	0	0	13	0	0	0	0	0	0	0	0	0	15	31	0	0
Cymatosiraceae	0.921053	AB430667	NA	Cymatosiraceae	Cymatosirales	Mediophyceae	family	['Extubocellulus spinifer', 'Papiliocellulus simplex', 'Leyanella probus', 'Pierrecomperia catenuloides', 'Extubocellulus cribriger']	NA	49244	aaacattacagccgctactatggaagaagtttacaagcgtgctgaatatgctaagaaaatcggttctatcgttgta	73	0	0	0	73	0	0	0	0	0	0	0	0	0	0	0	0	0	0	0	0	0	0	0	0	0	0	0	0	0	0	0	0	0	0	0	0	0
Cymatosiraceae	0.947368	HQ912487	NA	Cymatosiraceae	Cymatosirales	Mediophyceae	family	['Plagiogrammopsis vanheurckii']	NA	49244	aaacgtaacagctgcaacaatggaagaagtgtacaaacgtgccgagtacgctaaagaagttggttctgtaatcatc	60	0	0	0	0	0	0	0	0	0	0	0	0	0	0	0	0	0	0	0	11	0	0	0	0	0	0	0	0	0	0	0	0	0	11	38	0	0
Cymatosiraceae	0.935065	HQ912487	NA	Cymatosiraceae	Cymatosirales	Mediophyceae	family	['Plagiogrammopsis vanheurckii']	NA	49244	aaacgtaatagctgcaataatggaagaagtgtacaaacgtgctgagtacgctaaagaagttggttctgtaatcatc	52	0	0	0	0	52	0	0	0	0	0	0	0	0	0	0	0	0	0	0	0	0	0	0	0	0	0	0	0	0	0	0	0	0	0	0	0	0
Cymatosiraceae	0.973684	HQ912487	NA	Cymatosiraceae	Cymatosirales	Mediophyceae	family	[]	NA	49244	aaacgtaacagctgcaacaatggaagaagtgtacaaacgtgctgagtacgctaaaaaagttggttctgtaatcatc	31	0	0	0	0	0	0	0	0	0	0	0	0	0	0	0	31	0	0	0	0	0	0	0	0	0	0	0	0	0	0	0	0	0	0	0	0	0
Cymatosiraceae	0.947368	HQ912487	NA	Cymatosiraceae	Cymatosirales	Mediophyceae	family	['Plagiogrammopsis vanheurckii']	NA	49244	aaacgtaacagctgcaacaatggaagaagtgtacaaacgtgctgagtactctaaagaagttggttctgtaatcatc	26	0	0	0	0	0	0	0	0	0	0	0	0	0	0	0	0	0	0	0	0	0	0	0	0	0	0	0	0	0	0	0	0	0	0	26	0	0
Cymatosiraceae	0.947368	HQ912487	NA	Cymatosiraceae	Cymatosirales	Mediophyceae	family	['Plagiogrammopsis vanheurckii']	NA	49244	aaacgtaacagctacaacaatggaagaagtgtacaaacgtgctgagtacgctaaagaagttggttctgtaatcatc	23	0	0	0	0	0	0	0	0	0	0	0	0	0	0	0	0	0	0	0	0	0	0	0	0	0	0	0	0	0	0	0	0	0	0	23	0	0
Cymatosiraceae	0.947368	HQ912487	NA	Cymatosiraceae	Cymatosirales	Mediophyceae	family	['Plagiogrammopsis vanheurckii']	NA	49244	aaacgtaacagctgcaacaatggaagaagtgtacaaacgtgctgagtacgttaaagaagttggttctgtaatcatc	17	0	0	0	0	0	0	0	0	0	0	0	0	0	0	0	0	0	0	0	0	0	0	0	0	0	0	0	0	0	0	0	0	0	0	17	0	0
Desmarestia	0.986842	AB776773	Desmarestia	Desmarestiaceae	Desmarestiales	Phaeophyceae	genus	[]	NA	31339	taacgtaacttgtgcaacaatggaacaaatgtacgaacgtgcagaatatgctcattcaattggtagtattattgta	1750	0	0	0	0	0	0	0	0	0	0	0	0	0	0	0	0	0	0	0	0	0	0	0	0	0	0	0	0	0	0	0	0	0	0	1750	0	0
Detonula pumila	0.973684	DQ514814	Detonula	Thalassiosiraceae	Thalassiosirales	Mediophyceae	species	['Detonula pumila']	Detonula pumila	382365	aaacattactgctgcgacaatggaagaagtatacaaacgtgctgagtatgctaaagctattggttctgttgttgta	18	0	0	0	0	0	0	0	0	0	0	0	18	0	0	0	0	0	0	0	0	0	0	0	0	0	0	0	0	0	0	0	0	0	0	0	0	0
Dimeregramma	0.973684	KR048207	Dimeregramma	Plagiogrammaceae	Triceratiales	Bacillariophyceae	genus	['Dimeregramma minor', 'Dimeregramma sp. SZCZP42']	NA	505986	aaacgtaacagctgcaacaatggaagaagtatacaaacgtgctgagtatgctaaagctgttggttctgtaattgtt	42	0	0	0	0	0	0	0	0	0	0	0	0	0	0	0	0	0	0	0	0	0	0	0	0	42	0	0	0	0	0	0	0	0	0	0	0	0
Ditylum	1	DQ514766	Ditylum	Lithodesmiaceae	Lithodesmiales	Mediophyceae	genus	[]	NA	49248	aaacgtaactgctgcaactatggaagaagtttacaaacgtgcagaatacgctaaacaaatcggttctatcattatc	750	0	0	0	0	0	0	0	0	0	0	750	0	0	0	0	0	0	0	0	0	0	0	0	0	0	0	0	0	0	0	0	0	0	0	0	0	0
Entomoneis	1	MF000628	Entomoneis	Entomoneidaceae	Surirellales	Bacillariophyceae	genus	[]	NA	186042	aaacatcactgctggtacaatggaagaagtttacaaacgtgctgaatatgctaaagcagtaggttctatcgttgtt	829	0	0	0	0	0	0	0	0	0	0	0	0	0	0	0	0	0	0	0	829	0	0	0	0	0	0	0	0	0	0	0	0	0	0	0	0	0
Entomoneis cf. alata	1	MF000636	Entomoneis	Entomoneidaceae	Surirellales	Bacillariophyceae	species	['Entomoneis cf. alata']	Entomoneis cf. alata	216750	aaacatcactgctggtacaatggaagaagtttacaaacgtgctgagtacgctaaagcagtaggttctatcgttgtt	280	0	0	0	0	0	0	0	0	22	0	258	0	0	0	0	0	0	0	0	0	0	0	0	0	0	0	0	0	0	0	0	0	0	0	0	0	0
Eucampia	0.986842	KJ577893	Eucampia	Hemiaulaceae	Hemiaulales	Mediophyceae	genus	['Eucampia cornuta']	NA	49251	aaacgtaactgcagcaactatggaagaagtatacaaacgttctgagtatgctaaagttgtaggttctgttgtaatc	3603	0	0	0	0	0	0	0	0	0	0	0	0	0	0	0	0	0	0	0	0	0	0	0	0	3603	0	0	0	0	0	0	0	0	0	0	0	0
Eucampia	1	KC309567	Eucampia	Hemiaulaceae	Hemiaulales	Mediophyceae	genus	[]	NA	49251	aaacgtaactgcagcaactatggaagaagtatacaaacgttctgagtatgctaaaactgtaggttctgttgtaatc	1210	0	0	0	0	0	0	0	0	0	0	0	0	0	0	0	142	575	493	0	0	0	0	0	0	0	0	0	0	0	0	0	0	0	0	0	0	0
Fragilaria	0.986842	AM710473	Fragilaria	Fragilariaceae	Fragilariales	Bacillariophyceae	genus	['Fragilaria bidens', 'Fragilaria perminuta']	NA	33644	aaacatcactgctgctactatggaagaactttacaaacgtggtgagtatgctaaagctgtaggttctgtaatcgtt	5622	407	0	470	784	105	457	58	603	281	35	447	279	46	16	658	0	0	0	0	154	313	100	0	0	163	0	0	0	0	0	179	0	67	0	0	0	0
Fragilariaceae	0.973684	AM710473	NA	Fragilariaceae	Fragilariales	Bacillariophyceae	family	['Fragilaria bidens', 'Fragilaria perminuta']	NA	33856	aaacatcactgctgctactatggaagaactttacaaacgtggtgagtatgctagagctgtaggttctgtaatcgtt	328	0	0	0	328	0	0	0	0	0	0	0	0	0	0	0	0	0	0	0	0	0	0	0	0	0	0	0	0	0	0	0	0	0	0	0	0	0
Fragilariaceae	0.973684	AM710473	NA	Fragilariaceae	Fragilariales	Bacillariophyceae	family	['Fragilaria bidens', 'Fragilaria perminuta']	NA	33856	aaacatcactgctgctactatggaagaactttacaaacgtggtgagtatgctaaagctgtaggttctgtaatcatt	240	0	0	240	0	0	0	0	0	0	0	0	0	0	0	0	0	0	0	0	0	0	0	0	0	0	0	0	0	0	0	0	0	0	0	0	0	0
Fragilariaceae	0.973684	AM710473	NA	Fragilariaceae	Fragilariales	Bacillariophyceae	family	['Fragilaria bidens', 'Fragilaria perminuta']	NA	33856	aaacatcactgttgctactatggaagaactttacaaacgtggtgagtatgctaaagctgtaggttctgtaatcgtt	172	0	0	0	172	0	0	0	0	0	0	0	0	0	0	0	0	0	0	0	0	0	0	0	0	0	0	0	0	0	0	0	0	0	0	0	0	0
Fragilariaceae	0.960526	AM710473	NA	Fragilariaceae	Fragilariales	Bacillariophyceae	family	['Fragilaria bidens', 'Fragilaria perminuta']	NA	33856	aaacatcactgctgctactatggaagaactttataaatgtggtgagtatgctaaagctgtaggttctgtaatcgtt	69	0	0	0	69	0	0	0	0	0	0	0	0	0	0	0	0	0	0	0	0	0	0	0	0	0	0	0	0	0	0	0	0	0	0	0	0	0
Fragilariaceae	0.973684	AM710473	NA	Fragilariaceae	Fragilariales	Bacillariophyceae	family	['Fragilaria bidens', 'Fragilaria perminuta']	NA	33856	aaacatcactgctgctactatggaagaactttacaaacgtggtgagtatgctaaagctgtaggtactgtaatcgtt	48	0	0	0	48	0	0	0	0	0	0	0	0	0	0	0	0	0	0	0	0	0	0	0	0	0	0	0	0	0	0	0	0	0	0	0	0	0
Fragilariaceae	0.973684	AM710473	NA	Fragilariaceae	Fragilariales	Bacillariophyceae	family	['Fragilaria bidens', 'Fragilaria perminuta']	NA	33856	aaacatcactgctgctactatgaaagaactttacaaacgtggtgagtatgctaaagctgtaggttctgtaatcgtt	29	29	0	0	0	0	0	0	0	0	0	0	0	0	0	0	0	0	0	0	0	0	0	0	0	0	0	0	0	0	0	0	0	0	0	0	0	0
Fragilariaceae	0.960526	AM710473	NA	Fragilariaceae	Fragilariales	Bacillariophyceae	family	['Fragilaria bidens', 'Fragilaria perminuta']	NA	33856	aaacatcactgctgctactatggaagaactttacaaacgcggtgagtatgctaaagctgtaggttctgtaatcatt	18	0	0	18	0	0	0	0	0	0	0	0	0	0	0	0	0	0	0	0	0	0	0	0	0	0	0	0	0	0	0	0	0	0	0	0	0	0
Gomphonema	0.961039	HG530054	Gomphonema	Gomphonemataceae	Cymbellales	Bacillariophyceae	genus	['Gomphonema carolinense']	NA	97226	aaacattactgctgcgacaatggaagaagtatacaaacgtgctgagtatgctaaagctgttggttctgtaattgtt	284	0	0	29	10	0	0	0	0	0	0	0	0	0	0	0	29	41	0	39	0	0	0	13	0	123	0	0	0	0	0	0	0	0	0	0	0	0
Hantzschia amphioxys var. major	0.973684	HQ912390	Hantzschia	Bacillariaceae	Bacillariales	Bacillariophyceae	varietas	['Hantzschia amphioxys']	Hantzschia amphioxys	1003059	aaacgttacagctgcaactatggaagaagtatacaaacgtgctgagtatgctaaagaagtaggttctgtagttatt	254	0	0	0	0	0	0	254	0	0	0	0	0	0	0	0	0	0	0	0	0	0	0	0	0	0	0	0	0	0	0	0	0	0	0	0	0	0
Haslea	0.935065	HE663065	Haslea	Naviculaceae	Naviculales	Bacillariophyceae	genus	['Haslea ostrearia', 'Haslea sp. VL-2012']	NA	67475	aaacattactgcagctacaatggaagaagtttacaaacgtgcagaatatgccaaaatggtaggttctatcgttgtg	35	35	0	0	0	0	0	0	0	0	0	0	0	0	0	0	0	0	0	0	0	0	0	0	0	0	0	0	0	0	0	0	0	0	0	0	0	0
Haslea avium	1	KY937695	Haslea	Naviculaceae	Naviculales	Bacillariophyceae	species	['Haslea avium']	Haslea avium	2018708	aaacatcacagcagctactatggaagaagtttacaagcgtgctgagtacgctaaaatggtaggttctatcgtagtt	70586	618	1194	2000	5608	1328	1270	1786	2485	6700	1230	992	1551	3868	0	4320	939	238	0	0	1748	0	28605	0	0	0	77	0	0	0	2563	0	1466	0	0	0	0	0
Haslea avium	0.986842	KY937695	Haslea	Naviculaceae	Naviculales	Bacillariophyceae	species	['Haslea avium']	Haslea avium	2018708	aaacgtcacagcagctactatggaagaagtttacaagcgtgctgagtacgctaaaatggtaggttctatcgtagtt	1823	0	0	0	0	0	0	0	0	0	0	0	0	0	1090	0	0	0	0	0	0	0	18	0	0	0	0	0	0	0	0	0	0	715	0	0	0	0
Haslea avium	0.986842	KY937695	Haslea	Naviculaceae	Naviculales	Bacillariophyceae	species	['Haslea avium']	Haslea avium	2018708	aaacatcacagcagctactatggaaaaagtttacaagcgtgctgagtacgctaaaatggtaggttctatcgtagtt	627	0	0	0	0	0	0	0	0	627	0	0	0	0	0	0	0	0	0	0	0	0	0	0	0	0	0	0	0	0	0	0	0	0	0	0	0	0
Haslea avium	0.986842	KY937695	Haslea	Naviculaceae	Naviculales	Bacillariophyceae	species	['Haslea avium']	Haslea avium	2018708	aaacatcacagcagctactatggaagaagtttacaagcgtgctgagtacgctaaaatggtaggttctatcatagtt	213	195	0	0	0	0	0	0	0	0	0	0	0	0	0	0	0	0	0	0	0	0	18	0	0	0	0	0	0	0	0	0	0	0	0	0	0	0
Haslea avium	0.986842	KY937695	Haslea	Naviculaceae	Naviculales	Bacillariophyceae	species	['Haslea avium']	Haslea avium	2018708	aaacatcacagcagctactatggaagaagtttacaagcgtgctgagtacgctaaaatgataggttctatcgtagtt	183	0	0	0	0	0	0	0	0	0	0	0	0	0	0	0	0	0	0	0	0	0	0	0	0	0	0	0	183	0	0	0	0	0	0	0	0	0
Haslea avium	0.986842	KY937695	Haslea	Naviculaceae	Naviculales	Bacillariophyceae	species	['Haslea avium']	Haslea avium	2018708	aaacatcacagcagctactatggaagaagtttacaaacgtgctgagtacgctaaaatggtaggttctatcgtagtt	99	0	0	0	0	0	0	0	0	0	0	0	0	0	0	0	99	0	0	0	0	0	0	0	0	0	0	0	0	0	0	0	0	0	0	0	0	0
Haslea avium	0.986842	KY937695	Haslea	Naviculaceae	Naviculales	Bacillariophyceae	species	['Haslea avium']	Haslea avium	2018708	aaacatcacagcggctactatggaagaagtttacaagcgtgctgagtacgctaaaatggtaggttctatcgtagtt	84	0	0	0	0	0	0	0	0	19	0	0	0	12	0	23	0	0	0	0	0	0	30	0	0	0	0	0	0	0	0	0	0	0	0	0	0	0
Haslea avium	0.973684	KY937695	Haslea	Naviculaceae	Naviculales	Bacillariophyceae	species	['Haslea avium']	Haslea avium	2018708	aaacgccacagcagctactatggaagaagtttacaagcgtgctgagtacgctaaaatggtaggttctatcgtagtt	45	0	0	0	0	0	0	0	0	0	0	0	0	0	0	0	0	0	0	0	0	0	0	0	0	0	0	0	0	0	0	0	0	45	0	0	0	0
Haslea avium	0.960526	KY937695	Haslea	Naviculaceae	Naviculales	Bacillariophyceae	species	['Haslea avium']	Haslea avium	2018708	aaacattacagcagttattatggaagaagtttacaagcgtgctgagtacgctaaaatggtaggttctatcgtagtt	37	0	0	0	37	0	0	0	0	0	0	0	0	0	0	0	0	0	0	0	0	0	0	0	0	0	0	0	0	0	0	0	0	0	0	0	0	0
Haslea avium	0.986842	KY937695	Haslea	Naviculaceae	Naviculales	Bacillariophyceae	species	['Haslea avium']	Haslea avium	2018708	aaacatcacagcagctactatggaagaagtttacaagcgtgctgagtacgctaaaatggtaggttccatcgtagtt	33	0	0	0	0	0	0	0	0	11	0	0	0	0	0	0	0	0	0	0	0	0	22	0	0	0	0	0	0	0	0	0	0	0	0	0	0	0
Haslea avium	0.986842	KY937695	Haslea	Naviculaceae	Naviculales	Bacillariophyceae	species	['Haslea avium']	Haslea avium	2018708	aaacatcacagctgctactatggaagaagtttacaagcgtgctgagtacgctaaaatggtaggttctatcgtagtt	33	0	0	0	0	0	0	0	0	0	0	0	0	14	0	19	0	0	0	0	0	0	0	0	0	0	0	0	0	0	0	0	0	0	0	0	0	0
Haslea avium	0.986842	KY937695	Haslea	Naviculaceae	Naviculales	Bacillariophyceae	species	['Haslea avium']	Haslea avium	2018708	aaacatcacagcagctactatggaagaagtttacaagtgtgctgagtacgctaaaatggtaggttctatcgtagtt	32	0	0	22	0	0	0	0	0	0	0	0	0	0	0	0	0	0	0	0	0	0	10	0	0	0	0	0	0	0	0	0	0	0	0	0	0	0
Haslea avium	0.986842	KY937695	Haslea	Naviculaceae	Naviculales	Bacillariophyceae	species	['Haslea avium']	Haslea avium	2018708	aaacatcacagcagctactatgggagaagtttacaagcgtgctgagtacgctaaaatggtaggttctatcgtagtt	31	0	0	0	0	0	0	0	0	11	0	0	0	0	0	0	0	0	0	0	0	0	20	0	0	0	0	0	0	0	0	0	0	0	0	0	0	0
Haslea avium	0.960526	KY937695	Haslea	Naviculaceae	Naviculales	Bacillariophyceae	species	['Haslea avium']	Haslea avium	2018708	aaacgttactgcagctactatggaagaagtttacaagcgtgctgagtacgctaaaatggtaggttctatcgtagtt	20	0	0	0	0	0	0	0	0	0	0	0	10	0	0	10	0	0	0	0	0	0	0	0	0	0	0	0	0	0	0	0	0	0	0	0	0	0
Haslea avium	0.986842	KY937695	Haslea	Naviculaceae	Naviculales	Bacillariophyceae	species	['Haslea avium']	Haslea avium	2018708	aaacatcacagcagctactatggaagaagtttacaagcgtgctgagtatgctaaaatggtaggttctatcgtagtt	16	0	0	0	0	0	0	0	0	0	0	0	0	0	0	0	0	0	0	0	0	0	16	0	0	0	0	0	0	0	0	0	0	0	0	0	0	0
Haslea avium	0.986842	KY937695	Haslea	Naviculaceae	Naviculales	Bacillariophyceae	species	['Haslea avium']	Haslea avium	2018708	aaacattacagcagctactatggaagaagtttacaagcgtgctgagtacgctaaaatggtaggttctatcgtagtt	14	0	0	0	0	0	0	0	0	0	0	0	0	0	0	0	0	0	0	0	0	0	14	0	0	0	0	0	0	0	0	0	0	0	0	0	0	0
Haslea avium	0.986842	KY937695	Haslea	Naviculaceae	Naviculales	Bacillariophyceae	species	['Haslea avium']	Haslea avium	2018708	aaacatcacagcagctactatggaagaagtttacaagcgtgctgagtacgctaaaatggtaggttctatagtagtt	13	0	0	0	0	0	0	0	0	0	0	0	0	0	0	0	0	0	0	0	0	0	13	0	0	0	0	0	0	0	0	0	0	0	0	0	0	0
Haslea avium	0.960526	KY937695	Haslea	Naviculaceae	Naviculales	Bacillariophyceae	species	['Haslea avium']	Haslea avium	2018708	aaacatcacagctgctactatggaagaagtatacaaacgtgctgagtacgctaaaatggtaggttctatcgtagtt	11	0	0	0	0	0	0	0	0	0	0	0	0	0	0	11	0	0	0	0	0	0	0	0	0	0	0	0	0	0	0	0	0	0	0	0	0	0
Haslea avium	0.934211	KY937695	Haslea	Naviculaceae	Naviculales	Bacillariophyceae	species	['Haslea avium']	Haslea avium	2018708	aaacgttacttctgctactatggaagaagtttacaagcgtgctgagtacgctaaaatggtaggttctatcgtagtt	11	0	0	0	0	0	0	0	0	0	0	0	0	0	0	11	0	0	0	0	0	0	0	0	0	0	0	0	0	0	0	0	0	0	0	0	0	0
Haslea crucigera	0.973684	KC015014	Haslea	Naviculaceae	Naviculales	Bacillariophyceae	species	['Haslea crucigera']	Haslea crucigera	197754	taacgttactgcagctactatggaagaagtttacaaacgtgcagagtacgctaaagctgtaggttctgtaattatc	21	0	0	0	0	0	21	0	0	0	0	0	0	0	0	0	0	0	0	0	0	0	0	0	0	0	0	0	0	0	0	0	0	0	0	0	0	0
Hemiaulaceae	0.934211	HQ912533	NA	Hemiaulaceae	Hemiaulales	Mediophyceae	family	['Eucampia cornuta', 'Cerataulina pelagica']	NA	49250	aaacattactgctgcgacaatggaagaagtatacaaacgttctgagtatgctaaaacagttggttcagtagtaatc	11	0	0	0	0	0	0	0	0	0	0	0	0	0	0	0	0	0	0	11	0	0	0	0	0	0	0	0	0	0	0	0	0	0	0	0	0	0
Hemiaulus sinensis	0.986842	HQ912488	Hemiaulus	Hemiaulaceae	Hemiaulales	Mediophyceae	species	['Hemiaulus sinensis']	Hemiaulus sinensis	1003062	aaacattacagctgctactatggaagaagtatacaaacgtgctgagtatgctaaagctgttggttctgtaattgtt	32	0	0	0	0	0	0	0	0	0	0	0	0	0	0	0	0	0	0	0	0	0	0	0	0	32	0	0	0	0	0	0	0	0	0	0	0	0
Laminaria yezoensis	1	AY851555	Laminaria	Laminariaceae	Laminariales	Phaeophyceae	species	['Laminaria yezoensis']	Laminaria yezoensis	309353	taacgttactgctgcaacaatggaacaaatgtatgaacgtgcagagtacgctcattcaattggtactgttattgta	89	0	0	0	0	0	0	0	0	0	0	0	0	0	0	0	0	0	0	0	0	0	0	0	0	0	0	0	0	0	0	0	89	0	0	0	0	0
Laminariaceae	1	AY851562	NA	Laminariaceae	Laminariales	Phaeophyceae	family	[]	NA	33636	taacattactgctgcaacaatggaacaaatgtatgaacgtgcagagtacgctcattcaattggtactgttattgta	6684	0	0	0	0	0	0	0	0	0	0	0	0	0	0	0	0	17	0	0	120	10	0	0	918	0	270	803	0	0	39	226	16	54	0	2243	0	1968
Laminariaceae	0.986842	AY851562	NA	Laminariaceae	Laminariales	Phaeophyceae	family	[]	NA	33636	taacattactgctgcaacaatggaacaaatgtatgaacgtgcagagtacgctcattcaattggtattgttattgta	3108	0	0	0	0	0	0	0	0	0	0	0	0	0	0	0	0	0	0	0	0	0	0	0	0	0	0	0	0	0	0	0	0	3108	0	0	0	0
Laminariaceae	0.973684	AY851562	NA	Laminariaceae	Laminariales	Phaeophyceae	family	[]	NA	33636	taacattactgctgcaacgatggaacaaatgtatgaacgtgcagagtacgctcattcaattggtattgttattgta	244	0	0	0	0	0	0	0	0	0	0	0	0	0	0	0	0	0	0	0	0	0	0	0	0	0	0	0	0	0	0	0	0	244	0	0	0	0
Laminariocolax tomentosoides	1	AF055404	Laminariocolax	Chordariaceae	Ectocarpales	Phaeophyceae	species	['Laminariocolax tomentosoides']	Laminariocolax tomentosoides	64928	aaatattactgctgcaactatggaagagatgtatgaacgtgcagaatatgcacattcaatcggttcagttattgtg	74	0	0	0	0	0	0	0	0	0	0	0	0	0	0	0	74	0	0	0	0	0	0	0	0	0	0	0	0	0	0	0	0	0	0	0	0	0
Lauderia	1	KC969769	Lauderia	Lauderiaceae	Thalassiosirales	Mediophyceae	genus	[]	NA	49254	aaacgtaacagctgcaactatggaagaagtatacaaacgttctgagtatgctaaaacggttggttctgttgttatc	51	51	0	0	0	0	0	0	0	0	0	0	0	0	0	0	0	0	0	0	0	0	0	0	0	0	0	0	0	0	0	0	0	0	0	0	0	0
Leptocylindrus danicus	1	KC969773	Leptocylindrus	Leptocylindraceae	Leptocylindrales	Mediophyceae	species	['Leptocylindrus danicus']	Leptocylindrus danicus	163516	aaacattactgctggtactatggaagaagtatacaaacgtgctgagtatgctaaagttgtaggttctgtagttgta	15	0	0	0	0	15	0	0	0	0	0	0	0	0	0	0	0	0	0	0	0	0	0	0	0	0	0	0	0	0	0	0	0	0	0	0	0	0
Luticola sp.arsipunctata	0.960526	KM084940	Luticola	Diadesmidaceae	Naviculales	Bacillariophyceae	species	['Luticola sparsipunctata']	Luticola sparsipunctata	1560743	aaacatcacagcaggtactatggaagaagtttacaaacgtgcacaatatgctaaagcagtaggttctgttatcgtt	241	0	0	0	0	0	0	0	0	0	0	0	0	0	0	0	0	0	0	0	0	0	241	0	0	0	0	0	0	0	0	0	0	0	0	0	0	0
Mastogloiaceae	0.923077	MH756648	NA	Mastogloiaceae	Mastogloiales	Bacillariophyceae	family	['Mastogloia sp.', 'Aneumastus stroesei']	NA	2045115	aaacattactgcagctacttatgaagaagttctaaaacgtgctgagtatgcaaaatctgttggttctatcgttgtc	4030	0	0	389	0	0	42	0	0	0	0	0	0	0	0	0	0	0	0	0	0	0	0	0	0	0	0	0	0	0	0	0	0	3599	0	0	0	0
Mastogloiaceae	0.910256	MH756648	NA	Mastogloiaceae	Mastogloiales	Bacillariophyceae	family	['Mastogloia sp.', 'Aneumastus stroesei']	NA	2045115	aaacattactgcagctacttatgaagaagttctaaaatgtgctgagtatgcaaaatctgttggttctatcgttgtc	130	0	0	0	0	0	0	0	0	130	0	0	0	0	0	0	0	0	0	0	0	0	0	0	0	0	0	0	0	0	0	0	0	0	0	0	0	0
Mediophyceae	0.960526	KC309557	NA	NA	NA	Mediophyceae	class	['Bellerochea malleus', 'Helicotheca tamesis']	NA	589449	aaacgttactgcagcgactatggaagaagtttacaagcgtgcagaatatgctaagcaagtaggttctatcattatc	1682	0	0	0	0	0	0	0	0	0	0	0	0	0	0	0	0	0	0	0	0	0	0	0	0	1682	0	0	0	0	0	0	0	0	0	0	0	0
Mediophyceae	0.907895	HQ912541	NA	NA	NA	Mediophyceae	class	['Helicotheca tamesis', 'Bellerochea malleus', 'Biddulphia cf. reticulum MPA-2013', 'Biddulphia alternans']	NA	589449	taacgttactgcagctactatggaagacgtttacaaacgtgctgagtatgctaagcaagtcggttctatcattgtg	12	0	0	0	0	0	0	0	0	0	0	0	0	0	0	0	0	0	0	0	0	0	0	0	0	0	0	0	0	0	12	0	0	0	0	0	0	0
Melosira sp. 2BOF	0.986842	KC969782	Melosira	Melosiraceae	Melosirales	Coscinodiscophyceae	species	['Melosira sp. 2BOF']	Melosira sp. 2BOF	1366335	aaacatcactgccggtacaatggaagaagtttacaaacgtgctgagtacgctaagcaagttggttctatcgttgta	12	0	0	0	0	0	0	12	0	0	0	0	0	0	0	0	0	0	0	0	0	0	0	0	0	0	0	0	0	0	0	0	0	0	0	0	0	0
Minidiscus trioculatus	0.986842	DQ514793	Minidiscus	Thalassiosiraceae	Thalassiosirales	Mediophyceae	species	['Minidiscus trioculatus']	Minidiscus trioculatus	265540	aaacgttacagctgctacgatggaagaaatctacaagcgtgctgaatatgctaaagctgttggttctatcgttatt	45925	830	636	919	3193	535	545	1780	3092	4453	356	4404	2144	6261	7507	3702	0	0	0	211	2839	163	0	0	623	0	611	0	0	0	1121	0	0	0	0	0	0	0
Minidiscus trioculatus	1	DQ514793	Minidiscus	Thalassiosiraceae	Thalassiosirales	Mediophyceae	species	['Minidiscus trioculatus']	Minidiscus trioculatus	265540	aaacgttacagctgctacgatggaagaaatctacaagcgtgctgaatatgcgaaagctgttggttctatcgttatt	6278	0	0	0	0	0	0	0	0	0	0	0	0	0	0	0	0	0	0	0	0	0	0	0	0	0	0	0	790	0	646	63	4779	0	0	0	0	0
Minidiscus trioculatus	0.973684	DQ514793	Minidiscus	Thalassiosiraceae	Thalassiosirales	Mediophyceae	species	['Minidiscus trioculatus']	Minidiscus trioculatus	265540	aaacgttacagctgctacgatggaagaaatctacaagcgtgctgaatatgctaaagctgttggttctattgttatt	1458	0	0	0	105	0	0	0	0	0	0	0	0	0	0	0	0	0	0	0	0	0	0	0	0	0	0	1353	0	0	0	0	0	0	0	0	0	0
Minidiscus trioculatus	0.973684	DQ514793	Minidiscus	Thalassiosiraceae	Thalassiosirales	Mediophyceae	species	['Minidiscus trioculatus']	Minidiscus trioculatus	265540	aaacgttacagctgctacgatggaagaaatctacaagcgtgctgaatatgctaaagctattggttctatcgttatt	1399	0	0	0	0	0	0	0	0	0	0	1399	0	0	0	0	0	0	0	0	0	0	0	0	0	0	0	0	0	0	0	0	0	0	0	0	0	0
Minidiscus trioculatus	0.973684	DQ514793	Minidiscus	Thalassiosiraceae	Thalassiosirales	Mediophyceae	species	['Minidiscus trioculatus']	Minidiscus trioculatus	265540	aaacgttacagctgctacgatggaagaaatctacaagcatgctgaatatgctaaagctgttggttctatcgttatt	1077	0	0	0	124	0	0	10	0	21	0	922	0	0	0	0	0	0	0	0	0	0	0	0	0	0	0	0	0	0	0	0	0	0	0	0	0	0
Minidiscus trioculatus	0.973684	DQ514793	Minidiscus	Thalassiosiraceae	Thalassiosirales	Mediophyceae	species	['Minidiscus trioculatus']	Minidiscus trioculatus	265540	aaacgttacagctgctacgatggaagaaatctacaagcgtgctgaatatgctaaagctgttggttctatcgttgtt	489	0	12	0	10	14	0	21	41	20	0	53	54	146	55	63	0	0	0	0	0	0	0	0	0	0	0	0	0	0	0	0	0	0	0	0	0	0
Minidiscus trioculatus	0.973684	DQ514793	Minidiscus	Thalassiosiraceae	Thalassiosirales	Mediophyceae	species	['Minidiscus trioculatus']	Minidiscus trioculatus	265540	aaacattacagctgctacgatggaagaaatctacaagcgtgctgaatatgctaaagctgttggttctatcgttatt	356	0	0	12	16	0	110	10	14	18	0	20	16	77	13	50	0	0	0	0	0	0	0	0	0	0	0	0	0	0	0	0	0	0	0	0	0	0
Minidiscus trioculatus	0.973684	DQ514793	Minidiscus	Thalassiosiraceae	Thalassiosirales	Mediophyceae	species	['Minidiscus trioculatus']	Minidiscus trioculatus	265540	aaacgttacagctgctacgatggaagaaatctacaagcgtgctgaatatgctaaagctgttggttttatcgttatt	232	0	0	0	232	0	0	0	0	0	0	0	0	0	0	0	0	0	0	0	0	0	0	0	0	0	0	0	0	0	0	0	0	0	0	0	0	0
Minidiscus trioculatus	0.960526	DQ514793	Minidiscus	Thalassiosiraceae	Thalassiosirales	Mediophyceae	species	['Minidiscus trioculatus']	Minidiscus trioculatus	265540	aaacgttacagctgctacgatggaagaaatctacaagcgtgctgaatatgctaaagctgttggttctattattatt	208	0	0	0	0	0	0	0	0	0	0	0	0	0	0	0	0	0	0	0	0	0	0	0	0	0	0	208	0	0	0	0	0	0	0	0	0	0
Minidiscus trioculatus	0.973684	DQ514793	Minidiscus	Thalassiosiraceae	Thalassiosirales	Mediophyceae	species	['Minidiscus trioculatus']	Minidiscus trioculatus	265540	aaacgttacagctgctacgatggaagaaatctacaagcgtgctgaatatgttaaagctgttggttctatcgttatt	180	0	0	0	0	0	0	0	180	0	0	0	0	0	0	0	0	0	0	0	0	0	0	0	0	0	0	0	0	0	0	0	0	0	0	0	0	0
Minidiscus trioculatus	0.986842	DQ514793	Minidiscus	Thalassiosiraceae	Thalassiosirales	Mediophyceae	species	['Minidiscus trioculatus']	Minidiscus trioculatus	265540	aaacgttacagctgctacgatggaagaaatctacaagcgtgctgaatatgcgaaagccgttggttctatcgttatt	152	0	0	0	0	0	0	0	0	0	0	0	0	0	0	0	0	0	0	0	0	0	0	0	0	0	0	0	140	0	0	0	12	0	0	0	0	0
Minidiscus trioculatus	0.973684	DQ514793	Minidiscus	Thalassiosiraceae	Thalassiosirales	Mediophyceae	species	['Minidiscus trioculatus']	Minidiscus trioculatus	265540	aaacgttacagctgctacgatggaagaaatctacaagcgtgctgaatatgctaaagctgttggttctatcattatt	133	0	0	0	14	0	0	0	105	14	0	0	0	0	0	0	0	0	0	0	0	0	0	0	0	0	0	0	0	0	0	0	0	0	0	0	0	0
Minidiscus trioculatus	0.973684	DQ514793	Minidiscus	Thalassiosiraceae	Thalassiosirales	Mediophyceae	species	['Minidiscus trioculatus']	Minidiscus trioculatus	265540	aaacgttacagctgctacgatggaggaaatctacaagcgtgctgaatatgctaaagctgttggttctatcgttatt	82	0	0	0	13	0	0	0	0	11	0	0	0	34	14	10	0	0	0	0	0	0	0	0	0	0	0	0	0	0	0	0	0	0	0	0	0	0
Minidiscus trioculatus	0.973684	DQ514793	Minidiscus	Thalassiosiraceae	Thalassiosirales	Mediophyceae	species	['Minidiscus trioculatus']	Minidiscus trioculatus	265540	aaacgttacggctgctacgatggaagaaatctacaagcgtgctgaatatgctaaagctgttggttctatcgttatt	75	0	0	0	0	0	0	12	0	12	0	0	0	28	13	10	0	0	0	0	0	0	0	0	0	0	0	0	0	0	0	0	0	0	0	0	0	0
Minidiscus trioculatus	0.960526	DQ514793	Minidiscus	Thalassiosiraceae	Thalassiosirales	Mediophyceae	species	['Minidiscus trioculatus']	Minidiscus trioculatus	265540	aaacgttacagctgctacgatggaagaaatatacaagcatgctgaatatgctaaagctgttggttctatcgttatt	56	0	0	0	0	0	0	0	0	0	0	56	0	0	0	0	0	0	0	0	0	0	0	0	0	0	0	0	0	0	0	0	0	0	0	0	0	0
Minidiscus trioculatus	0.973684	DQ514793	Minidiscus	Thalassiosiraceae	Thalassiosirales	Mediophyceae	species	['Minidiscus trioculatus']	Minidiscus trioculatus	265540	aaacgttacagctgctacgatggaagaaatctacaagcgtgctgaatatgctaaagctgttggtcctatcgttatt	43	0	0	0	0	0	0	0	0	26	0	0	0	0	17	0	0	0	0	0	0	0	0	0	0	0	0	0	0	0	0	0	0	0	0	0	0	0
Minidiscus trioculatus	0.947368	DQ514793	Minidiscus	Thalassiosiraceae	Thalassiosirales	Mediophyceae	species	['Minidiscus trioculatus']	Minidiscus trioculatus	265540	aaacgttacagctgctacgatggaagaaatctacaagcgtgctgaatatgctaaagctgttggttctgtagttgtt	21	0	0	0	0	0	0	0	0	0	0	0	0	10	0	11	0	0	0	0	0	0	0	0	0	0	0	0	0	0	0	0	0	0	0	0	0	0
Minidiscus trioculatus	0.960526	DQ514793	Minidiscus	Thalassiosiraceae	Thalassiosirales	Mediophyceae	species	['Minidiscus trioculatus']	Minidiscus trioculatus	265540	aagcgttacagctgctacgatggaagaaatctacaagcgtgctgaatatgctaaagctgttggttctaccgttatt	12	0	0	0	0	0	0	0	0	0	0	0	0	0	12	0	0	0	0	0	0	0	0	0	0	0	0	0	0	0	0	0	0	0	0	0	0	0
Nannochloropsis	0.960526	AB052280	Nannochloropsis	Monodopsidaceae	Eustigmatales	Eustigmatophyceae	genus	['Nannochloropsis oceanica', 'Nannochloropsis granulata']	NA	5748	taacgttactgcagctactatggaagaaatgtacgaacgttctgaattcgctaaacttatcggttcagtaattatc	12133	0	0	0	0	0	0	0	0	0	0	0	0	0	0	0	0	0	0	0	0	0	0	0	0	0	0	0	0	0	0	0	0	0	0	0	12133	0
Nannochloropsis	0.934211	AB052280	Nannochloropsis	Monodopsidaceae	Eustigmatales	Eustigmatophyceae	genus	['Nannochloropsis oceanica', 'Nannochloropsis granulata', 'Nannochloropsis salina']	NA	5748	taacgttactgctgctactatggaagaaatgtacgaacgttctgaattcgctaaacttatcggttcagtaattgtc	4900	0	0	0	0	0	0	0	0	0	0	0	0	0	0	0	0	0	0	0	0	0	0	0	0	0	0	0	0	0	0	18	0	0	0	783	3727	372
Navicula	0.986842	MH064106	Navicula	Naviculaceae	Naviculales	Bacillariophyceae	genus	['Navicula symmetrica', 'Navicula sp.']	NA	50949	aaacatcacagcagctactatggaagaagtgtacaaacgtgcagagtacgctaaaatggttggttctgtaattgtt	1695	0	0	0	0	0	0	0	0	0	0	0	0	0	0	0	0	0	0	0	0	0	0	0	0	1695	0	0	0	0	0	0	0	0	0	0	0	0
Navicula	0.973684	JQ432376	Navicula	Naviculaceae	Naviculales	Bacillariophyceae	genus	['Navicula gregaria', 'Navicula sp.', 'Navicula incertata']	NA	50949	aaacatcacagcagctactatggaagaagtgtacaaacgtgcagagtatgctaaaatggtaggttctatcattgtc	207	207	0	0	0	0	0	0	0	0	0	0	0	0	0	0	0	0	0	0	0	0	0	0	0	0	0	0	0	0	0	0	0	0	0	0	0	0
Navicula	0.960526	AB430695	Navicula	Naviculaceae	Naviculales	Bacillariophyceae	genus	['Navicula sp. s0020']	NA	50949	aaacatcacagcagcgactatggaagaagtttacaaacgtgctgagtatgctaagagcgttggttcgatcgttgtt	141	0	0	0	0	0	0	0	0	0	0	0	0	0	0	0	0	0	0	0	0	0	0	0	0	0	0	0	0	0	0	0	141	0	0	0	0	0
Navicula	0.934211	JX905668	Navicula	Naviculaceae	Naviculales	Bacillariophyceae	genus	['Navicula cf. duerrenbergiana', 'Navicula ramosissima']	NA	50949	aaacgtcacagcagctacaatggaagaagtttacaaacgtgcagagtacgctaaaactgttggttctgtcgttgtt	88	0	0	0	0	0	0	0	0	0	88	0	0	0	0	0	0	0	0	0	0	0	0	0	0	0	0	0	0	0	0	0	0	0	0	0	0	0
Navicula lanceolata	0.986842	FJ002148	Navicula	Naviculaceae	Naviculales	Bacillariophyceae	species	['Navicula lanceolata']	Navicula lanceolata	265549	aaacatcacagcggctactatggaagaagtatacaaacgtgctgagtatgctaaagctgttggttctatcgttgtt	107	0	0	0	0	0	0	0	0	0	0	0	0	33	0	15	0	0	0	0	0	0	0	0	0	59	0	0	0	0	0	0	0	0	0	0	0	0
Navicula lanceolata	0.986842	FJ002148	Navicula	Naviculaceae	Naviculales	Bacillariophyceae	species	['Navicula lanceolata']	Navicula lanceolata	265549	aaacatcacagctgctactatggaagaagtatacaaacgtgctgagtatgctaaagctgttggttctatcgttgtt	51	0	0	0	0	0	0	0	0	0	0	0	0	27	0	24	0	0	0	0	0	0	0	0	0	0	0	0	0	0	0	0	0	0	0	0	0	0
Navicula ramosissima	0.947368	JX905668	Navicula	Naviculaceae	Naviculales	Bacillariophyceae	species	['Navicula ramosissima']	Navicula ramosissima	265559	aaacatcacagcagctacaatggaagaagtttacaaacgtgcagagtacgctaaaactgttggttctgtcgttgtt	2526	0	0	0	0	0	0	0	0	0	0	0	0	0	0	0	0	0	0	0	0	0	0	0	0	0	0	0	0	0	0	0	0	2526	0	0	0	0
Navicula ramosissima	0.960526	JX905668	Navicula	Naviculaceae	Naviculales	Bacillariophyceae	species	['Navicula ramosissima']	Navicula ramosissima	265559	aaacatcacagcagcgactatggaagaagtttacaaacgtgcagagtacgctaaaactgttggttctatcatcgtt	10	0	0	0	0	0	0	0	0	0	0	0	10	0	0	0	0	0	0	0	0	0	0	0	0	0	0	0	0	0	0	0	0	0	0	0	0	0
Naviculaceae	0.960526	KC015014	NA	Naviculaceae	Naviculales	Bacillariophyceae	family	['Hippodonta capitata', 'Haslea crucigera', 'Haslea nipkowii']	NA	67474	aaacgttactgcagctactatggaagaagtttacaaacgtgcagagtacgctaaatctgtaggttctgtagttatc	5513	0	0	0	0	0	0	0	0	0	0	0	0	0	0	0	0	0	0	0	0	0	0	0	0	0	0	0	0	0	0	0	0	0	5513	0	0	0
Naviculaceae	0.922078	KY320308	NA	Naviculaceae	Naviculales	Bacillariophyceae	family	['Seminavis robusta', 'Navicula incertata', 'Navicula bottnica', 'Navicula sp.', 'Haslea cf. howeana']	NA	67474	aaacgttacagcagctacaatggaagaagtgtacaaacgtgcagagtacgctaaaactgttggttctgtcgttgtt	4276	0	0	0	0	0	0	0	0	0	0	0	0	0	0	0	0	0	0	0	0	0	0	0	0	0	0	0	0	0	0	4276	0	0	0	0	0	0
Naviculales	0.960526	KM084942	NA	NA	Naviculales	Bacillariophyceae	order	['Navicula agatkae', 'Navicula slesvicensis', 'Gyrosigma acuminatum']	NA	38748	taacgttactgcagctactatggaagaagtttacaaacgtgcagagtatgctaaaacagtaggttctataattgta	21799	0	0	0	0	0	0	0	0	0	0	0	0	0	0	0	0	0	0	0	0	0	0	0	0	0	0	0	84	0	0	0	21	0	14291	31	7210	162
Naviculales	0.934211	AM710440	NA	NA	Naviculales	Bacillariophyceae	order	['Pleurosigma sp.', 'Phaeodactylum tricornutum', 'Navicula slesvicensis', 'Gyrosigma acuminatum', 'Navicula gregaria', 'Navicula ramosissima', 'Gyrosigma limosum', 'Gyrosigma tenuissimum', 'Navicula sp.', 'Haslea sp.']	NA	38748	aaacatcacagcagctactatggaagaagtttacaagcgcgcagaatacgctaaaacggtaggttctatcgttgtc	7802	0	0	0	0	0	0	0	0	0	0	0	0	0	600	0	0	0	0	0	0	0	0	0	0	0	0	0	0	0	0	0	7202	0	0	0	0	0
Naviculales	0.934211	AM710432	NA	NA	Naviculales	Bacillariophyceae	order	['Pleurosigma sp.', 'Navicula salinicola', 'Hippodonta capitata', 'Haslea feriarum', 'Haslea crucigera', 'Haslea nipkowii', 'Navicula sp.']	NA	38748	aaacgtcactgcagctactatggaagaagtttacaaacgtgcagagtatgctaaatctgtaggttctgtagttata	6030	0	0	0	0	0	0	0	0	0	0	0	0	0	0	0	0	0	0	0	0	0	0	0	6030	0	0	0	0	0	0	0	0	0	0	0	0	0
Naviculales	0.935065	KM084942	NA	NA	Naviculales	Bacillariophyceae	order	['Navicula slesvicensis', 'Halamphora parvipunctata', 'Navicula veneta', 'Gyrosigma acuminatum', 'Navicula gregaria', 'Navicula agatkae', 'Haslea ostrearia', 'Gyrosigma limosum', 'Halamphora foramina', 'Rhoicosigma sp.', 'Navicula sp.']	NA	38748	aaacattactgcagctactatggaagaagtatacaaacgtgcagaatatgctaaacaagtaggttctatcgttgta	1057	0	0	0	0	0	0	0	0	0	0	0	0	0	0	0	0	0	0	0	0	0	0	1057	0	0	0	0	0	0	0	0	0	0	0	0	0	0
Naviculales	0.947368	MH040277	NA	NA	Naviculales	Bacillariophyceae	order	['Pleurosigma sp.', 'Hippodonta capitata', 'Pleurosigma elongatum', 'Navicula sp. C20']	NA	38748	aaacgttactgccgctactatggaagaagtctacaaacgtgcagactatgctaaaatggtaggttctgtagttatc	594	0	0	0	0	0	0	0	0	0	0	0	0	0	0	0	0	0	0	0	0	0	0	0	0	0	594	0	0	0	0	0	0	0	0	0	0	0
Naviculales	0.934211	KU179122	NA	NA	Naviculales	Bacillariophyceae	order	['Parlibellus hamulifer', 'Halamphora adumbratoides']	NA	38748	aaacgttactgctggtactatggaagaagtttacaaacgtgctgcttacgctaaagcagttggttctgtagttatc	73	0	0	0	0	0	0	0	0	0	0	0	12	24	0	0	0	0	0	0	0	0	24	0	0	0	0	13	0	0	0	0	0	0	0	0	0	0
Naviculales	0.947368	KM084942	NA	NA	Naviculales	Bacillariophyceae	order	['Navicula slesvicensis', 'Halamphora parvipunctata', 'Navicula veneta', 'Gyrosigma acuminatum', 'Navicula gregaria', 'Navicula agatkae', 'Gyrosigma limosum', 'Rhoicosigma sp.', 'Navicula sp.']	NA	38748	taacgttactgcagctactatggaagaagtttacaagcgtgcagagtatgctaaaacagtaggttctataattgta	33	0	0	0	0	0	0	0	0	0	0	0	0	0	0	0	0	0	0	0	0	0	0	0	0	0	0	0	0	0	0	0	0	0	23	0	10	0
Naviculales	0.948052	KM084942	NA	NA	Naviculales	Bacillariophyceae	order	['Gyrosigma acuminatum', 'Navicula agatkae', 'Rhoicosigma sp.', 'Navicula slesvicensis']	NA	38748	taacgttactgcagctactatggaagaagtttacaaacgtgcagagtatgctaaaacagtaggttctatagttgta	20	0	0	0	0	0	0	0	0	0	0	0	0	0	0	0	0	0	0	0	0	0	0	0	0	0	0	0	0	0	0	0	0	0	20	0	0	0
Naviculales	0.960526	JQ432376	NA	NA	Naviculales	Bacillariophyceae	order	['Navicula gregaria', 'Gyrosigma acuminatum', 'Navicula incertata', 'Navicula sp.', 'Haslea sp.']	NA	38748	aaacatcacagcagctactatggaagaagtgtacaaacgtgcagagtatgctaaaatggtgggttctatcattgtc	13	13	0	0	0	0	0	0	0	0	0	0	0	0	0	0	0	0	0	0	0	0	0	0	0	0	0	0	0	0	0	0	0	0	0	0	0	0
Nitzschia	0.986842	FN557026	Nitzschia	Bacillariaceae	Bacillariales	Bacillariophyceae	genus	['Nitzschia palea', 'Nitzschia capitellata']	NA	2857	aaacgttacaggtgctacaatggaagacgtttacgaacgttctgagtacgctaaagaagtaggttctgtaattatc	46536	0	17	0	0	0	0	0	78	136	178	22	687	836	0	0	0	0	944	0	0	0	0	1599	0	0	0	0	0	0	0	0	0	42039	0	0	0	0
Nitzschia	0.986842	KP400286	Nitzschia	Bacillariaceae	Bacillariales	Bacillariophyceae	genus	['Nitzschia sp. AnM0026', 'Nitzschia aff. dubiiformis NE-2015']	NA	2857	aaacattaccggcgcaactatggaagatgtatacgaacgtgctgagtatgctaaagaaataggttctatcgttgtt	41649	230	0	181	1299	62	149	978	623	956	391	270	14	911	8600	5883	1050	1711	2731	0	0	198	122	3756	2737	4543	366	196	0	0	0	0	3692	0	0	0	0	0
Nitzschia	0.973684	KP400286	Nitzschia	Bacillariaceae	Bacillariales	Bacillariophyceae	genus	['Nitzschia sp. AnM0026', 'Nitzschia aff. dubiiformis NE-2015']	NA	2857	aaacatcaccggcgcaactatggaagatgtatacgaacgtgctgagtatgctaaagaagtaggttctatcgtcgtt	29536	0	48	0	0	0	0	221	182	608	485	0	114	811	8005	177	0	0	0	3229	0	2670	51	96	11878	0	0	0	0	0	0	0	961	0	0	0	0	0
Nitzschia	0.973684	FN557026	Nitzschia	Bacillariaceae	Bacillariales	Bacillariophyceae	genus	['Nitzschia palea', 'Nitzschia capitellata']	NA	2857	aaacgttacaggcgctacaatggaagacgtttacgaacgttctgagtacgctaaagaagtaggttctgtaattatc	8432	0	0	0	0	0	0	0	0	0	0	0	0	0	0	0	0	0	0	0	0	0	8328	0	0	0	0	0	0	0	0	0	0	104	0	0	0	0
Nitzschia	0.960526	FN557030	Nitzschia	Bacillariaceae	Bacillariales	Bacillariophyceae	genus	['Nitzschia palea', 'Nitzschia capitellata']	NA	2857	gaacgttacaggtgctacaatggaagacgtttacgaacgtgctgagtatgctaaagaattaggttctgtaattatc	3794	0	0	0	0	0	0	0	0	0	0	0	0	0	0	0	0	0	0	0	0	0	0	0	0	0	0	0	0	0	0	3033	0	75	0	686	0	0
Nitzschia	0.973684	FN557026	Nitzschia	Bacillariaceae	Bacillariales	Bacillariophyceae	genus	['Nitzschia palea', 'Nitzschia capitellata']	NA	2857	aaacgttacaggtgctacaatggaagacgtttacgaacgttctgagtacgctaaagaagtaggttctgtagttatc	3548	0	0	0	0	0	0	0	0	0	0	0	0	0	0	0	0	0	0	0	0	0	0	0	0	0	0	0	0	0	0	0	0	3548	0	0	0	0
Nitzschia	0.986842	EU090049	Nitzschia	Bacillariaceae	Bacillariales	Bacillariophyceae	genus	['Nitzschia sp. AnM0026', 'Nitzschia aff. dubiiformis NE-2015']	NA	2857	aaacattactggcgcaactatggaagatgtatacgaacgtgctgagtatgctaaagaaataggttctatcgttgtt	1087	0	0	0	0	0	0	0	0	0	0	0	0	499	0	588	0	0	0	0	0	0	0	0	0	0	0	0	0	0	0	0	0	0	0	0	0	0
Nitzschia	0.960526	KP400286	Nitzschia	Bacillariaceae	Bacillariales	Bacillariophyceae	genus	['Nitzschia sp. AnM0026', 'Nitzschia sp. s0819', 'Nitzschia aff. dubiiformis NE-2015']	NA	2857	aaacatcaccggcgcaactatggaagatgtatacgaacgtgctgagtatgctaaagaagtaagttctatcgtcgtt	940	0	0	0	0	0	0	0	0	0	0	940	0	0	0	0	0	0	0	0	0	0	0	0	0	0	0	0	0	0	0	0	0	0	0	0	0	0
Nitzschia	0.973684	KP400286	Nitzschia	Bacillariaceae	Bacillariales	Bacillariophyceae	genus	['Nitzschia sp. AnM0026', 'Nitzschia aff. dubiiformis NE-2015']	NA	2857	aaacattaccggcgcaactatagaagatgtatacgaacgtgctgagtatgctaaagaaataggttctatcgttgtt	743	0	0	0	0	0	0	0	0	0	0	0	0	0	0	743	0	0	0	0	0	0	0	0	0	0	0	0	0	0	0	0	0	0	0	0	0	0
Nitzschia	0.922078	KP400286	Nitzschia	Bacillariaceae	Bacillariales	Bacillariophyceae	genus	['Nitzschia sp. AnM0026', 'Nitzschia sp. s0819', 'Nitzschia aff. dubiiformis NE-2015']	NA	2857	aaacattaccggcgcaactatggaagatgtatacgaacgtgctgagtatgctaaagctattggttctgtagttgtt	162	0	0	0	0	0	0	0	0	0	0	0	0	0	19	42	30	18	0	0	0	0	0	16	0	37	0	0	0	0	0	0	0	0	0	0	0	0
Nitzschia	0.973684	FN557026	Nitzschia	Bacillariaceae	Bacillariales	Bacillariophyceae	genus	['Nitzschia palea', 'Nitzschia capitellata']	NA	2857	aaacgttacaggtgctacaatggaagacgtttacgaacgttctgagtacgctaaagaggtaggttctgtaattatc	136	0	0	0	0	0	0	0	0	0	0	0	52	0	0	0	0	0	0	0	0	0	0	0	0	0	0	0	0	0	0	0	0	84	0	0	0	0
Nitzschia	0.973684	KP400286	Nitzschia	Bacillariaceae	Bacillariales	Bacillariophyceae	genus	['Nitzschia sp. AnM0026', 'Nitzschia aff. dubiiformis NE-2015']	NA	2857	aaacattaccggcgcaactatggaagatgtatacgaacgtgctgagtatgttaaagaaataggttctatcgttgtt	94	0	0	0	0	0	0	52	0	0	0	0	15	27	0	0	0	0	0	0	0	0	0	0	0	0	0	0	0	0	0	0	0	0	0	0	0	0
Nitzschia	0.973684	FN557026	Nitzschia	Bacillariaceae	Bacillariales	Bacillariophyceae	genus	['Nitzschia palea', 'Nitzschia capitellata']	NA	2857	aaacgttacaggtgctacaatggaagacgcttacgaacgttctgagtacgctaaagaagtaggttctgtaattatc	94	0	0	0	0	0	0	0	0	0	0	0	0	0	0	0	0	0	0	0	0	0	0	0	0	0	0	0	0	0	0	0	0	94	0	0	0	0
Nitzschia	0.947368	KP400286	Nitzschia	Bacillariaceae	Bacillariales	Bacillariophyceae	genus	['Nitzschia sp. AnM0026', 'Nitzschia sp. s0819', 'Nitzschia aff. dubiiformis NE-2015']	NA	2857	aaacattaccggcgcaactatggaagatgtatacgaacgtgctgagtatgctaaagaaataaattctatcgttatt	93	0	93	0	0	0	0	0	0	0	0	0	0	0	0	0	0	0	0	0	0	0	0	0	0	0	0	0	0	0	0	0	0	0	0	0	0	0
Nitzschia	0.973684	FN557026	Nitzschia	Bacillariaceae	Bacillariales	Bacillariophyceae	genus	['Nitzschia palea', 'Nitzschia capitellata']	NA	2857	aaacgttacaggtgctacaatggaagacgtttacgaacgttctgagtacgctaaggaagtaggttctgtaattatc	88	0	0	0	0	0	0	0	0	0	0	0	0	0	0	0	0	0	0	0	0	0	0	0	0	0	0	0	0	0	0	0	0	88	0	0	0	0
Nitzschia	0.960526	KP400286	Nitzschia	Bacillariaceae	Bacillariales	Bacillariophyceae	genus	['Nitzschia sp. AnM0026', 'Nitzschia sp. s0819', 'Nitzschia aff. dubiiformis NE-2015']	NA	2857	aaacatcaccggcgcaactatgaaagatgtatacgaacgtgctgagtatgctaaagaagtaggttctatcgtcgtt	76	0	0	0	0	0	0	76	0	0	0	0	0	0	0	0	0	0	0	0	0	0	0	0	0	0	0	0	0	0	0	0	0	0	0	0	0	0
Nitzschia	0.973684	FN557026	Nitzschia	Bacillariaceae	Bacillariales	Bacillariophyceae	genus	['Nitzschia palea', 'Nitzschia capitellata']	NA	2857	aaacgttacaggtgctacaatggaagacgtttacgaacgttctgagtacgctaaagaagtaggttctgtaactatc	63	0	0	0	0	0	0	0	0	34	0	0	0	0	0	0	0	0	0	0	0	0	0	0	0	0	0	0	0	0	0	0	0	29	0	0	0	0
Nitzschia	0.973684	FN557026	Nitzschia	Bacillariaceae	Bacillariales	Bacillariophyceae	genus	['Nitzschia palea', 'Nitzschia capitellata']	NA	2857	aaacgttacaggtgctacaatgggagacgtttacgaacgttctgagtacgctaaagaagtaggttctgtaattatc	59	0	0	0	0	0	0	0	0	0	0	0	0	0	0	0	0	0	0	0	0	0	0	0	0	0	0	0	0	0	0	0	0	59	0	0	0	0
Nitzschia	0.973684	KP400286	Nitzschia	Bacillariaceae	Bacillariales	Bacillariophyceae	genus	['Nitzschia sp. AnM0026', 'Nitzschia aff. dubiiformis NE-2015']	NA	2857	aaacattaccggcgcaactatggaagatgtatacgaacgtgctgagtatgctaaagaagtaagttctatcgtcgtt	55	0	0	0	0	0	0	0	0	0	0	55	0	0	0	0	0	0	0	0	0	0	0	0	0	0	0	0	0	0	0	0	0	0	0	0	0	0
Nitzschia	0.973684	KP400286	Nitzschia	Bacillariaceae	Bacillariales	Bacillariophyceae	genus	['Nitzschia sp. AnM0026', 'Nitzschia aff. dubiiformis NE-2015']	NA	2857	aaacattaccggcgcaactatggaagatgtatacgagcgtgctgagtatgctaaagaaataggttctatcgttgtt	51	0	0	0	0	0	0	0	0	0	0	0	0	0	10	12	19	0	0	0	0	0	0	0	0	0	0	0	0	0	0	0	10	0	0	0	0	0
Nitzschia	0.960526	KP400286	Nitzschia	Bacillariaceae	Bacillariales	Bacillariophyceae	genus	['Nitzschia sp. AnM0026', 'Nitzschia sp. s0819', 'Nitzschia aff. dubiiformis NE-2015']	NA	2857	aaacatcaccggcgcaactatggaagatgtatacgaacgtgctgagtatgctaaagaagtaggtcctatcgtcgtt	46	0	0	0	0	0	0	0	0	0	0	0	0	0	13	0	0	0	0	0	0	0	0	0	33	0	0	0	0	0	0	0	0	0	0	0	0	0
Nitzschia	0.960526	KP400286	Nitzschia	Bacillariaceae	Bacillariales	Bacillariophyceae	genus	['Nitzschia sp. AnM0026', 'Nitzschia sp. s0819', 'Nitzschia aff. dubiiformis NE-2015']	NA	2857	aaacatcaccggcgcaactatggaggatgtatacgaacgtgctgagtatgctaaagaagtaggttctatcgtcgtt	42	0	0	0	0	0	0	0	0	0	0	0	0	0	12	0	0	0	0	0	0	0	0	0	30	0	0	0	0	0	0	0	0	0	0	0	0	0
Nitzschia	0.973684	KP400286	Nitzschia	Bacillariaceae	Bacillariales	Bacillariophyceae	genus	['Nitzschia sp. AnM0026', 'Nitzschia aff. dubiiformis NE-2015']	NA	2857	aaacattaccggcgcaactatggaagatgtatacgaacgtgccgagtatgctaaagaaataggttctatcgttgtt	34	12	0	0	0	0	0	0	0	0	0	0	0	0	0	11	0	0	0	0	0	0	0	11	0	0	0	0	0	0	0	0	0	0	0	0	0	0
Nitzschia	0.973684	KP400286	Nitzschia	Bacillariaceae	Bacillariales	Bacillariophyceae	genus	['Nitzschia sp. AnM0026', 'Nitzschia aff. dubiiformis NE-2015']	NA	2857	aaacattaccggcgcaactatggaagatgtatacgaacgcgctgagtatgctaaagaaataggttctatcgttgtt	30	0	0	0	0	0	0	0	0	0	0	0	0	0	17	0	0	0	0	0	0	0	0	0	0	13	0	0	0	0	0	0	0	0	0	0	0	0
Nitzschia	0.960526	KP400286	Nitzschia	Bacillariaceae	Bacillariales	Bacillariophyceae	genus	['Nitzschia sp. AnM0026', 'Nitzschia sp. s0819', 'Nitzschia aff. dubiiformis NE-2015']	NA	2857	aaacatcaccggcgcaactatggaagatgtatacgaacgtgctgagtacgctaaagaagtaggttctatcgtcgtt	30	0	0	0	0	0	0	0	0	0	0	0	0	0	15	0	0	0	0	0	0	0	0	0	15	0	0	0	0	0	0	0	0	0	0	0	0	0
Nitzschia	0.960526	KP400286	Nitzschia	Bacillariaceae	Bacillariales	Bacillariophyceae	genus	['Nitzschia sp. AnM0026', 'Nitzschia sp. s0819', 'Nitzschia aff. dubiiformis NE-2015']	NA	2857	aaacatcaccggcgcaactatggaagatgtatacgaacgtgctgagtatgctaaagaagtaggttctatcgtcatt	27	0	0	0	0	0	0	27	0	0	0	0	0	0	0	0	0	0	0	0	0	0	0	0	0	0	0	0	0	0	0	0	0	0	0	0	0	0
Nitzschia	0.973684	KP400286	Nitzschia	Bacillariaceae	Bacillariales	Bacillariophyceae	genus	['Nitzschia sp. AnM0026', 'Nitzschia aff. dubiiformis NE-2015']	NA	2857	aaacattaccggcgcaactatggaaggtgtatacgaacgtgctgagtatgctaaagaaataggttctatcgttgtt	25	0	0	0	0	0	0	0	0	0	0	0	12	0	13	0	0	0	0	0	0	0	0	0	0	0	0	0	0	0	0	0	0	0	0	0	0	0
Nitzschia	0.973684	FN557026	Nitzschia	Bacillariaceae	Bacillariales	Bacillariophyceae	genus	['Nitzschia palea', 'Nitzschia capitellata']	NA	2857	aaacgttacaggtgctacaattgaagacgtttacgaacgttctgagtacgctaaagaagtaggttctgtaattatc	25	0	0	0	0	0	0	0	0	0	0	0	0	0	0	0	0	0	0	0	0	0	0	0	0	0	0	0	0	0	0	0	0	25	0	0	0	0
Nitzschia	0.973684	KP400286	Nitzschia	Bacillariaceae	Bacillariales	Bacillariophyceae	genus	['Nitzschia sp. AnM0026', 'Nitzschia aff. dubiiformis NE-2015']	NA	2857	aagcattaccggcgcaactatggaagatgtatacgaacgtgctgagtatgctaaagaaataggttctatcgttgtt	24	0	0	0	0	0	0	0	0	0	0	0	0	0	24	0	0	0	0	0	0	0	0	0	0	0	0	0	0	0	0	0	0	0	0	0	0	0
Nitzschia	0.974026	KP400286	Nitzschia	Bacillariaceae	Bacillariales	Bacillariophyceae	genus	['Nitzschia sp. AnM0026', 'Nitzschia aff. dubiiformis NE-2015']	NA	2857	aaacattaccggcgcaactatggaagatgtatacgaacgtgctgagtatgctaaaggaataggttctatcgttgtt	23	0	0	0	0	0	0	0	0	0	0	0	0	0	10	13	0	0	0	0	0	0	0	0	0	0	0	0	0	0	0	0	0	0	0	0	0	0
Nitzschia	0.922078	MH040273	Nitzschia	Bacillariaceae	Bacillariales	Bacillariophyceae	genus	['Nitzschia sp. (in: Bacillariophyta)', 'Nitzschia sigma']	NA	2857	aaacgttacagctgctacttatgaagaagttgttaaacgtgctgagtacgctaaagaagtaggttctgtaattatc	19	0	0	0	0	0	0	0	0	0	0	0	0	0	0	0	0	0	0	0	19	0	0	0	0	0	0	0	0	0	0	0	0	0	0	0	0	0
Nitzschia	0.973684	FN557026	Nitzschia	Bacillariaceae	Bacillariales	Bacillariophyceae	genus	['Nitzschia palea', 'Nitzschia sp. (in: Bacillariophyta)', 'Nitzschia capitellata']	NA	2857	aaacgttactggtgctacaatggaagacgtttacgaacgttctgagtacgctaaagaagtaggttctgtaattatc	18	0	0	0	0	0	0	0	0	0	0	0	0	0	0	0	0	0	0	0	0	0	0	0	0	0	0	0	0	0	0	0	0	18	0	0	0	0
Nitzschia	0.973684	FN557026	Nitzschia	Bacillariaceae	Bacillariales	Bacillariophyceae	genus	['Nitzschia palea', 'Nitzschia capitellata']	NA	2857	aaacgttacaggtgctacaatggaagacgtttacgaaagttctgagtacgctaaagaagtaggttctgtaattatc	16	0	0	0	0	0	0	0	0	0	0	0	0	0	0	0	0	0	0	0	0	0	0	0	0	0	0	0	0	0	0	0	0	16	0	0	0	0
Nitzschia	0.973684	FN557026	Nitzschia	Bacillariaceae	Bacillariales	Bacillariophyceae	genus	['Nitzschia palea', 'Nitzschia capitellata']	NA	2857	aaacgttacaggtgctactatggaagacgtttacgaacgttctgagtacgctaaagaagtaggttctgtaattatc	14	0	0	0	0	0	0	0	0	0	0	0	0	0	0	0	0	0	0	0	0	0	0	0	0	0	0	0	0	0	0	0	0	14	0	0	0	0
Nitzschia	0.960526	KP400286	Nitzschia	Bacillariaceae	Bacillariales	Bacillariophyceae	genus	['Nitzschia sp. AnM0026', 'Nitzschia sp. s0819', 'Nitzschia aff. dubiiformis NE-2015']	NA	2857	aaacattaccggcgcaactatggaagatgtatacgaacgtgctgagtatgctaaagctgttggttctatcgttgtt	12	0	0	0	0	0	0	0	0	0	0	0	0	0	0	0	0	0	0	0	0	0	0	0	0	12	0	0	0	0	0	0	0	0	0	0	0	0
Nitzschia	0.973684	KP400286	Nitzschia	Bacillariaceae	Bacillariales	Bacillariophyceae	genus	['Nitzschia sp. AnM0026', 'Nitzschia aff. dubiiformis NE-2015']	NA	2857	aaacattaccggtgcaactatggaagatgtatacgaacgtgctgagtatgctaaagaaataggttctatcgttgtt	11	0	0	0	0	11	0	0	0	0	0	0	0	0	0	0	0	0	0	0	0	0	0	0	0	0	0	0	0	0	0	0	0	0	0	0	0	0
Nitzschia	0.973684	FN557030	Nitzschia	Bacillariaceae	Bacillariales	Bacillariophyceae	genus	['Nitzschia palea', 'Nitzschia capitellata']	NA	2857	aaacgttacaggtgctacaatggaagacgtttacgaacgtgctgagtatgctaaagaattaggttctgtaattatc	10	0	0	0	0	0	0	0	0	0	0	0	0	0	0	0	0	0	0	0	0	0	0	0	0	0	0	0	0	0	0	10	0	0	0	0	0	0
Nitzschia	0.960526	KP400286	Nitzschia	Bacillariaceae	Bacillariales	Bacillariophyceae	genus	['Nitzschia sp. AnM0026', 'Nitzschia sp. s0819', 'Nitzschia aff. dubiiformis NE-2015']	NA	2857	aaacattaccggcgcaactatggaagatgtatacgaacgtgctgagtatgctaaagaaataggttctatcgttatc	10	0	0	0	0	0	0	0	0	0	0	0	0	0	0	10	0	0	0	0	0	0	0	0	0	0	0	0	0	0	0	0	0	0	0	0	0	0
Nitzschia	0.909091	JN162797	Nitzschia	Bacillariaceae	Bacillariales	Bacillariophyceae	genus	['Nitzschia volvendirostrata']	NA	2857	aaacatcacagcggctactatggaagaagtgtacaaacgtgctgagtacgctaaagaagttggttcaatcgtaatc	10	0	0	0	0	0	0	0	0	0	0	0	0	10	0	0	0	0	0	0	0	0	0	0	0	0	0	0	0	0	0	0	0	0	0	0	0	0
Nitzschia	0.947368	KP400286	Nitzschia	Bacillariaceae	Bacillariales	Bacillariophyceae	genus	['Nitzschia sp. AnM0026', 'Nitzschia sp. s0819', 'Nitzschia aff. dubiiformis NE-2015']	NA	2857	aaacatcaccagcgcaactatggaagatgtatacgaacgtgctaagtatgctaaagaagtaggttctatcgtcgtt	10	0	0	0	0	0	0	0	0	0	0	0	0	0	10	0	0	0	0	0	0	0	0	0	0	0	0	0	0	0	0	0	0	0	0	0	0	0
Nitzschia aff. dubiiformis NE-2015	1	KP400286	Nitzschia	Bacillariaceae	Bacillariales	Bacillariophyceae	species	['Nitzschia aff. dubiiformis NE-2015']	Nitzschia aff. dubiiformis NE-2015	1747710	aaacattaccggcgcaactatggaagatgtatacgaacgtgctgagtatgctaaagaagtaggttctatcgttgtt	918	0	0	0	57	0	0	0	0	0	0	0	0	0	28	819	0	0	0	0	0	0	0	14	0	0	0	0	0	0	0	0	0	0	0	0	0	0
Nitzschia aurariae	0.973684	KT943663	Nitzschia	Bacillariaceae	Bacillariales	Bacillariophyceae	species	['Nitzschia aurariae']	Nitzschia aurariae	1880613	aaacgttacagctgcaactatggaagaagtaatcaaacgttgtgagtacgctaaagaagtaggctctgtaattgtt	291	0	0	0	0	0	0	0	0	0	0	291	0	0	0	0	0	0	0	0	0	0	0	0	0	0	0	0	0	0	0	0	0	0	0	0	0	0
Nitzschia capitellata	1	FN557030	Nitzschia	Bacillariaceae	Bacillariales	Bacillariophyceae	species	['Nitzschia capitellata']	Nitzschia capitellata	483532	aaacgttacaggtgctacaatggaagacgtttacgaacgttctgagtatgctaaagaagtaggttctgtaattatc	17	0	0	0	0	0	0	0	0	0	0	0	0	0	0	0	0	0	0	0	0	0	0	0	0	0	0	0	0	0	0	0	0	17	0	0	0	0
Nitzschia cf. frigida	0.948052	MH064110	Nitzschia	Bacillariaceae	Bacillariales	Bacillariophyceae	species	['Nitzschia cf. frigida']	Nitzschia cf. frigida	2220034	aaacgttactgctgcgacaatggaagaagttatcaagcgtgctgagtacgctaaagaagtaggttctgtaattatc	91338	227	571	997	1568	315	640	758	1655	1908	74	2402	211	1713	1982	1757	58	0	2921	537	434	1801	0	116	3478	0	0	0	0	0	0	0	0	0	0	38028	27187	0
Nitzschia cf. frigida	0.960526	MH064110	Nitzschia	Bacillariaceae	Bacillariales	Bacillariophyceae	species	['Nitzschia cf. frigida']	Nitzschia cf. frigida	2220034	aaacgttactgctgctacgatggcagaagttatcaaacgtgctgagtacgctaaagaagtaggttctgtagttatc	13663	0	0	0	0	0	12	282	581	77	12	0	292	3308	0	0	0	0	0	0	0	0	1154	0	0	0	0	7945	0	0	0	0	0	0	0	0	0	0
Nitzschia cf. frigida	1	MH064110	Nitzschia	Bacillariaceae	Bacillariales	Bacillariophyceae	species	['Nitzschia cf. frigida']	Nitzschia cf. frigida	2220034	aaacgttactgctgctacaatgacagaagttatcaagcgtgctgagtacgctaaagaagtaggttctgtagttatc	6326	0	0	0	0	0	0	0	180	0	199	0	0	1865	0	0	0	0	0	0	0	0	0	0	0	0	0	0	0	0	0	0	0	0	4082	0	0	0
Nitzschia cf. frigida	0.948052	MH064110	Nitzschia	Bacillariaceae	Bacillariales	Bacillariophyceae	species	['Nitzschia cf. frigida']	Nitzschia cf. frigida	2220034	aaacgttactgctgcaacaatggaagaagttatcaaacgtgctgagtacgctaaagaagtaggttctgtagttatc	3345	0	0	0	0	0	0	338	210	31	13	485	72	0	27	0	33	74	0	0	0	0	0	2062	0	0	0	0	0	0	0	0	0	0	0	0	0	0
Nitzschia cf. frigida	0.973684	MH064110	Nitzschia	Bacillariaceae	Bacillariales	Bacillariophyceae	species	['Nitzschia cf. frigida']	Nitzschia cf. frigida	2220034	aaacgttactgctgctacaatggcagaagttatcaaacgtgctgagtacgctaaagaagtaggttctgtagttatc	2493	0	0	0	0	0	0	111	0	913	85	34	0	0	0	1350	0	0	0	0	0	0	0	0	0	0	0	0	0	0	0	0	0	0	0	0	0	0
Nitzschia cf. frigida	0.948052	MH064110	Nitzschia	Bacillariaceae	Bacillariales	Bacillariophyceae	species	['Nitzschia cf. frigida']	Nitzschia cf. frigida	2220034	aaacgttactgctgctacgatggaagaagttatcaaacgtgctgagtacgctaaagaagtaggttctgtagttatc	1273	0	0	0	0	0	0	56	0	0	0	0	0	0	0	886	0	0	0	0	0	0	0	0	0	0	0	0	0	0	0	331	0	0	0	0	0	0
Nitzschia cf. frigida	0.922078	MH064110	Nitzschia	Bacillariaceae	Bacillariales	Bacillariophyceae	species	['Nitzschia cf. frigida']	Nitzschia cf. frigida	2220034	aaacgttactgctgcgacaatggaagaagttattaagcgtgctgagtacgttaaagaagtaggttctgtaattatc	1156	0	0	0	0	0	0	0	0	1156	0	0	0	0	0	0	0	0	0	0	0	0	0	0	0	0	0	0	0	0	0	0	0	0	0	0	0	0
Nitzschia cf. frigida	0.961039	MH064110	Nitzschia	Bacillariaceae	Bacillariales	Bacillariophyceae	species	['Nitzschia cf. frigida']	Nitzschia cf. frigida	2220034	aaacgttactgctgctacaatggaagaagttatcaaacgtgctgagtacgctaaagaagtaggttctgtagttatc	1102	0	0	0	0	0	0	0	0	0	0	0	0	0	0	0	0	0	0	0	0	0	1102	0	0	0	0	0	0	0	0	0	0	0	0	0	0	0
Nitzschia cf. frigida	0.973684	MH064110	Nitzschia	Bacillariaceae	Bacillariales	Bacillariophyceae	species	['Nitzschia cf. frigida']	Nitzschia cf. frigida	2220034	aaacgttactgctgctacgatgacagaagttatcaaacgtgctgagtacgctaaagaagtaggttctgtagttatc	926	0	0	0	0	0	0	0	0	0	0	0	0	0	0	0	0	0	0	0	0	0	0	0	0	0	0	0	0	0	0	926	0	0	0	0	0	0
Nitzschia cf. frigida	0.934211	MH064110	Nitzschia	Bacillariaceae	Bacillariales	Bacillariophyceae	species	['Nitzschia cf. frigida']	Nitzschia cf. frigida	2220034	aaacgttacagcggctactatgaccgaagttatcaaacgtgctgagtacgctaaagaagtaggttctgtagttatc	726	0	0	0	0	0	0	0	0	0	0	726	0	0	0	0	0	0	0	0	0	0	0	0	0	0	0	0	0	0	0	0	0	0	0	0	0	0
Nitzschia cf. frigida	0.935065	MH064110	Nitzschia	Bacillariaceae	Bacillariales	Bacillariophyceae	species	['Nitzschia cf. frigida']	Nitzschia cf. frigida	2220034	aaacgttactgctgcgacaatggaagaagttatcaagcgtgctgagtacgctaaagaagtaggttttgtaattatc	485	0	0	0	0	0	0	0	0	0	0	0	0	0	0	0	0	0	0	0	0	0	0	485	0	0	0	0	0	0	0	0	0	0	0	0	0	0
Nitzschia cf. frigida	0.935065	MH064110	Nitzschia	Bacillariaceae	Bacillariales	Bacillariophyceae	species	['Nitzschia cf. frigida']	Nitzschia cf. frigida	2220034	aaacgttactgctgcgataatggaagaagttatcaagcgtgctgagtacgctaaagaagtaggttctgtaattatc	432	0	0	0	0	10	0	0	0	0	0	0	0	0	410	0	0	0	0	0	0	0	0	0	0	0	0	0	0	0	0	0	0	0	0	12	0	0
Nitzschia cf. frigida	0.935065	MH064110	Nitzschia	Bacillariaceae	Bacillariales	Bacillariophyceae	species	['Nitzschia cf. frigida']	Nitzschia cf. frigida	2220034	aaacgttactgctgcgacaatggaagaagttatcaagcgtgctgagtacgctaaagaagtaggttccgtaattatc	393	0	0	0	0	0	0	0	0	0	0	0	0	0	0	0	0	0	0	0	0	0	0	0	313	0	0	0	0	0	0	0	0	0	0	50	30	0
Nitzschia cf. frigida	0.960526	MH064110	Nitzschia	Bacillariaceae	Bacillariales	Bacillariophyceae	species	['Nitzschia cf. frigida']	Nitzschia cf. frigida	2220034	aaacgttactgctgcgacaatgaaagaagttatcaagcgtgctgagtacgctaaagaagtaggttctgtaattatc	351	0	0	0	0	0	0	29	11	0	0	311	0	0	0	0	0	0	0	0	0	0	0	0	0	0	0	0	0	0	0	0	0	0	0	0	0	0
Nitzschia cf. frigida	0.947368	MH064110	Nitzschia	Bacillariaceae	Bacillariales	Bacillariophyceae	species	['Nitzschia cf. frigida']	Nitzschia cf. frigida	2220034	aaacgttactgctgctacgatggcagaagttatcaaacgtgctgagtacgctaaagaagtaagttctgtagttatc	219	0	0	0	0	0	0	0	0	0	0	0	0	0	0	0	0	0	0	0	0	219	0	0	0	0	0	0	0	0	0	0	0	0	0	0	0	0
Nitzschia cf. frigida	0.909091	MH064110	Nitzschia	Bacillariaceae	Bacillariales	Bacillariophyceae	species	['Nitzschia cf. frigida']	Nitzschia cf. frigida	2220034	aaacgttactgctgcgacaatggaagaagttatcaagcatactaagtacgctaaagaagtaggttctgtaattatc	120	0	120	0	0	0	0	0	0	0	0	0	0	0	0	0	0	0	0	0	0	0	0	0	0	0	0	0	0	0	0	0	0	0	0	0	0	0
Nitzschia cf. frigida	0.961039	MH064110	Nitzschia	Bacillariaceae	Bacillariales	Bacillariophyceae	species	['Nitzschia cf. frigida']	Nitzschia cf. frigida	2220034	aaacgttactgctgcgacaatggaagaagttatcaagcgtgctgagtacgctaaagaagtaggttctgtagttatc	117	0	0	0	0	0	0	0	0	0	0	0	0	44	0	11	0	0	0	0	0	0	0	0	0	0	0	0	0	0	0	0	0	0	0	48	14	0
Nitzschia cf. frigida	0.935065	MH064110	Nitzschia	Bacillariaceae	Bacillariales	Bacillariophyceae	species	['Nitzschia cf. frigida']	Nitzschia cf. frigida	2220034	aaacgttactgctgcgacaatggaagaagttatcaagcgtgctgagtacgctaaagaagtagattctgtaattatc	111	0	0	0	0	98	0	0	0	0	0	0	0	0	0	0	0	0	0	0	0	0	0	0	0	0	0	0	0	0	0	0	0	0	0	13	0	0
Nitzschia cf. frigida	0.935065	MH064110	Nitzschia	Bacillariaceae	Bacillariales	Bacillariophyceae	species	['Nitzschia cf. frigida']	Nitzschia cf. frigida	2220034	aaacgttactgctgcgacaatggaagaagttatcaaacgtgctgagtacgctaaagaagtaggttctgtaattatc	93	0	0	0	0	0	0	36	28	0	0	0	0	0	0	0	0	0	17	0	0	0	0	0	0	0	0	0	0	0	0	0	0	0	0	12	0	0
Nitzschia cf. frigida	0.935065	MH064110	Nitzschia	Bacillariaceae	Bacillariales	Bacillariophyceae	species	['Nitzschia cf. frigida']	Nitzschia cf. frigida	2220034	aaacgttactgctgcgacaatggaagaggttatcaagcgtgctgagtacgctaaagaagtaggttctgtaattatc	85	0	0	0	0	0	0	0	0	0	0	0	0	0	0	0	0	0	0	0	0	0	0	0	0	0	0	0	0	0	0	0	0	0	0	49	36	0
Nitzschia cf. frigida	0.935065	MH064110	Nitzschia	Bacillariaceae	Bacillariales	Bacillariophyceae	species	['Nitzschia cf. frigida']	Nitzschia cf. frigida	2220034	aaacattactgctgcgacaatggaagaagttatcaagcgtgctgagtacgctaaagaagtaggttctgtaattatc	77	0	0	0	0	0	0	0	0	0	0	14	0	0	0	0	0	0	0	0	0	17	0	0	0	0	0	0	0	0	0	0	0	0	0	33	13	0
Nitzschia cf. frigida	0.947368	MH064110	Nitzschia	Bacillariaceae	Bacillariales	Bacillariophyceae	species	['Nitzschia cf. frigida']	Nitzschia cf. frigida	2220034	aaacgttactgctgctacgatggcagaagttatcaaacgtgctgagtacgctaaagaagtagattctgtagttatc	38	0	0	0	0	0	0	0	0	0	0	0	0	0	0	0	0	0	0	0	0	38	0	0	0	0	0	0	0	0	0	0	0	0	0	0	0	0
Nitzschia cf. frigida	0.922078	MH064110	Nitzschia	Bacillariaceae	Bacillariales	Bacillariophyceae	species	['Nitzschia cf. frigida']	Nitzschia cf. frigida	2220034	aaacgttactgctgcgacaatggaagaagttatcaagcgtgctgagtacgctaaagaagtaggttccgtaactatc	36	0	0	0	0	0	0	0	0	0	0	0	0	0	0	0	0	0	0	0	0	0	0	0	36	0	0	0	0	0	0	0	0	0	0	0	0	0
Nitzschia cf. frigida	0.922078	MH064110	Nitzschia	Bacillariaceae	Bacillariales	Bacillariophyceae	species	['Nitzschia cf. frigida']	Nitzschia cf. frigida	2220034	aaacgttactgctgcgacaatggaagaagttatcaagcgtgctgagtacgctaaagaagtaggttttgtaattacc	33	0	0	0	0	0	0	0	0	0	0	0	0	0	0	0	0	0	0	0	0	0	0	33	0	0	0	0	0	0	0	0	0	0	0	0	0	0
Nitzschia cf. frigida	0.935065	MH064110	Nitzschia	Bacillariaceae	Bacillariales	Bacillariophyceae	species	['Nitzschia cf. frigida']	Nitzschia cf. frigida	2220034	aaactttactgctgcgacaatggaagaagttatcaagcgtgctgagtacgctaaagaagtaggttctgtaattatc	30	0	0	0	0	0	0	0	0	0	0	0	0	0	0	0	0	0	0	0	0	0	0	0	0	0	0	0	0	0	0	0	0	0	0	18	12	0
Nitzschia cf. frigida	0.947368	MH064110	Nitzschia	Bacillariaceae	Bacillariales	Bacillariophyceae	species	['Nitzschia cf. frigida']	Nitzschia cf. frigida	2220034	aaacgttactgctgctacgatggcagaagttatcaaacgtgctgagtacgctaaggaagtaggttctgtagttatc	30	0	0	0	0	0	0	0	0	0	0	0	0	10	0	0	0	0	0	0	0	0	0	0	0	0	0	20	0	0	0	0	0	0	0	0	0	0
Nitzschia cf. frigida	0.960526	MH064110	Nitzschia	Bacillariaceae	Bacillariales	Bacillariophyceae	species	['Nitzschia cf. frigida']	Nitzschia cf. frigida	2220034	aaacgttactgttgctacaatggcagaagttatcaaacgtgctgagtacgctaaagaagtaggttctgtagttatc	30	0	0	0	30	0	0	0	0	0	0	0	0	0	0	0	0	0	0	0	0	0	0	0	0	0	0	0	0	0	0	0	0	0	0	0	0	0
Nitzschia cf. frigida	0.947368	MH064110	Nitzschia	Bacillariaceae	Bacillariales	Bacillariophyceae	species	['Nitzschia cf. frigida']	Nitzschia cf. frigida	2220034	aaacgttactgctgctacgatggcagaaattatcaaacgtgctgagtacgctaaagaagtaggttctgtagttatc	27	0	0	0	0	0	0	27	0	0	0	0	0	0	0	0	0	0	0	0	0	0	0	0	0	0	0	0	0	0	0	0	0	0	0	0	0	0
Nitzschia cf. frigida	0.947368	MH064110	Nitzschia	Bacillariaceae	Bacillariales	Bacillariophyceae	species	['Nitzschia cf. frigida']	Nitzschia cf. frigida	2220034	aaacgctactgctgctacgatggcagaagttatcaaacgtgctgagtacgctaaagaagtaggttctgtagttatc	22	0	0	0	0	0	0	0	0	0	11	0	0	0	0	0	0	0	0	0	0	0	0	0	0	0	0	11	0	0	0	0	0	0	0	0	0	0
Nitzschia cf. frigida	0.947368	MH064110	Nitzschia	Bacillariaceae	Bacillariales	Bacillariophyceae	species	['Nitzschia cf. frigida']	Nitzschia cf. frigida	2220034	aaacgttactgctgctacgatggcaggagttatcaaacgtgctgagtacgctaaagaagtaggttctgtagttatc	17	0	0	0	0	0	0	0	0	0	0	0	0	0	0	0	0	0	0	0	0	0	0	0	0	0	0	17	0	0	0	0	0	0	0	0	0	0
Nitzschia cf. frigida	0.935065	MH064110	Nitzschia	Bacillariaceae	Bacillariales	Bacillariophyceae	species	['Nitzschia cf. frigida']	Nitzschia cf. frigida	2220034	aaacgttacagctgcgacaatggaagaagttatcaagcgtgctgagtacgctaaagaagtaggttctgtaattatc	13	0	0	0	0	0	0	0	0	0	0	0	0	0	0	0	0	0	0	0	0	0	0	0	0	0	0	0	0	0	0	0	0	0	0	13	0	0
Nitzschia cf. frigida	0.935065	MH064110	Nitzschia	Bacillariaceae	Bacillariales	Bacillariophyceae	species	['Nitzschia cf. frigida']	Nitzschia cf. frigida	2220034	aaacgttactgctgcgacaatggaagaagttatcaagcgtgctgagtacgctaaagaagttggttctgtaattatc	13	0	0	0	0	0	0	0	0	0	0	0	0	0	0	13	0	0	0	0	0	0	0	0	0	0	0	0	0	0	0	0	0	0	0	0	0	0
Nitzschia cf. frigida	0.947368	MH064110	Nitzschia	Bacillariaceae	Bacillariales	Bacillariophyceae	species	['Nitzschia cf. frigida']	Nitzschia cf. frigida	2220034	aaacgttactgctgctacgatggcagaagttaccaaacgtgctgagtacgctaaagaagtaggttctgtagttatc	13	0	0	0	0	0	0	0	0	0	0	0	0	0	0	0	0	0	0	0	0	0	0	0	0	0	0	13	0	0	0	0	0	0	0	0	0	0
Nitzschia cf. frigida	0.947368	MH064110	Nitzschia	Bacillariaceae	Bacillariales	Bacillariophyceae	species	['Nitzschia cf. frigida']	Nitzschia cf. frigida	2220034	aaacgttactgctgctacgatggcagaagttatcaaacgtgctgagtacgctaaagaagtaggttctgtaattatc	12	0	0	0	0	0	0	0	0	0	0	0	0	12	0	0	0	0	0	0	0	0	0	0	0	0	0	0	0	0	0	0	0	0	0	0	0	0
Nitzschia cf. frigida	0.947368	MH064110	Nitzschia	Bacillariaceae	Bacillariales	Bacillariophyceae	species	['Nitzschia cf. frigida']	Nitzschia cf. frigida	2220034	aaacgttactgctgcgacaatgaaagaagctatcaagcgtgctgagtacgctaaagaagtaggttctgtaattatc	11	0	0	0	0	0	0	11	0	0	0	0	0	0	0	0	0	0	0	0	0	0	0	0	0	0	0	0	0	0	0	0	0	0	0	0	0	0
Nitzschia cf. paleacea	0.960526	KY320319	Nitzschia	Bacillariaceae	Bacillariales	Bacillariophyceae	species	['Nitzschia cf. paleacea']	Nitzschia cf. paleacea	2014780	aaacgttacttctgctactatggaagaagtatacaaacgtgctgagtacgctaaagaagttggttctgtaattatc	43762	120	0	680	513	170	144	630	2349	4697	249	2596	269	2108	5790	15138	0	0	58	0	0	795	6484	330	0	18	0	0	0	0	0	0	0	0	624	0	0	0
Nitzschia cf. paleacea	0.947368	KY320319	Nitzschia	Bacillariaceae	Bacillariales	Bacillariophyceae	species	['Nitzschia cf. paleacea']	Nitzschia cf. paleacea	2014780	aaacgttacttctgctactatggaagaagtatacaaacgtgcttagtacgctaaagaagttggttctgtaattatc	312	0	0	0	0	0	0	0	0	0	0	0	0	0	312	0	0	0	0	0	0	0	0	0	0	0	0	0	0	0	0	0	0	0	0	0	0	0
Nitzschia cf. paleacea	0.947368	KY320319	Nitzschia	Bacillariaceae	Bacillariales	Bacillariophyceae	species	['Nitzschia cf. paleacea']	Nitzschia cf. paleacea	2014780	aaacgttacttctgctactatggaagaagtatacaaacgtgttgagtacgctaaagaagttggttctgtaattatc	283	0	0	0	0	0	0	0	283	0	0	0	0	0	0	0	0	0	0	0	0	0	0	0	0	0	0	0	0	0	0	0	0	0	0	0	0	0
Nitzschia cf. paleacea	0.947368	KY320319	Nitzschia	Bacillariaceae	Bacillariales	Bacillariophyceae	species	['Nitzschia cf. paleacea']	Nitzschia cf. paleacea	2014780	aaacgttacttctgctactatggaagaagtatacaaacgtgctgaatacgctaaagaagttggttctgtaattatc	136	0	0	0	0	0	116	20	0	0	0	0	0	0	0	0	0	0	0	0	0	0	0	0	0	0	0	0	0	0	0	0	0	0	0	0	0	0
Nitzschia cf. paleacea	0.947368	KY320319	Nitzschia	Bacillariaceae	Bacillariales	Bacillariophyceae	species	['Nitzschia cf. paleacea']	Nitzschia cf. paleacea	2014780	aaacgttacttctgctactatggaagaagtatacaaacgtgctgagtacgctaaagaggttggttctgtaattatc	104	0	0	0	0	0	0	0	0	10	0	0	0	0	11	70	0	0	0	0	0	0	13	0	0	0	0	0	0	0	0	0	0	0	0	0	0	0
Nitzschia cf. paleacea	0.960526	KY320319	Nitzschia	Bacillariaceae	Bacillariales	Bacillariophyceae	species	['Nitzschia cf. paleacea']	Nitzschia cf. paleacea	2014780	aaacgttactgcagctactatggaagaagtatacaaacgtgctgagtacgctaaagaagttggttctgtaattatc	70	0	0	0	0	0	0	0	0	0	0	0	0	0	14	56	0	0	0	0	0	0	0	0	0	0	0	0	0	0	0	0	0	0	0	0	0	0
Nitzschia cf. paleacea	0.973684	KY320319	Nitzschia	Bacillariaceae	Bacillariales	Bacillariophyceae	species	['Nitzschia cf. paleacea']	Nitzschia cf. paleacea	2014780	aaacgttacagctgccactatggaagaagtatacaaacgtgctgagtacgctaaagaagttggttctgtaattatc	53	0	0	0	0	0	0	0	0	0	0	0	0	10	0	43	0	0	0	0	0	0	0	0	0	0	0	0	0	0	0	0	0	0	0	0	0	0
Nitzschia cf. paleacea	0.947368	KY320319	Nitzschia	Bacillariaceae	Bacillariales	Bacillariophyceae	species	['Nitzschia cf. paleacea']	Nitzschia cf. paleacea	2014780	aaacgttacttctgctactatggaagaagtatacaaacgtgctaagtacgctaaagaagttggttctgtaattatc	49	0	0	0	0	0	0	0	23	0	0	0	14	0	0	12	0	0	0	0	0	0	0	0	0	0	0	0	0	0	0	0	0	0	0	0	0	0
Nitzschia cf. paleacea	0.947368	KY320319	Nitzschia	Bacillariaceae	Bacillariales	Bacillariophyceae	species	['Nitzschia cf. paleacea']	Nitzschia cf. paleacea	2014780	aaacgttacttctgctactatggaagaagtatacaaacgtgctgagtacgctaaagaagttggctctgtaattatc	33	0	0	0	0	0	0	0	0	0	0	0	0	0	10	23	0	0	0	0	0	0	0	0	0	0	0	0	0	0	0	0	0	0	0	0	0	0
Nitzschia cf. paleacea	0.934211	KY320319	Nitzschia	Bacillariaceae	Bacillariales	Bacillariophyceae	species	['Nitzschia cf. paleacea']	Nitzschia cf. paleacea	2014780	aaacgttacttctgctactatggaagaagtatacaaacgtgctgagtacgctaaagaagttggttctgtagtaatc	25	0	0	0	0	0	0	0	0	0	0	0	0	0	0	25	0	0	0	0	0	0	0	0	0	0	0	0	0	0	0	0	0	0	0	0	0	0
Nitzschia cf. paleacea	0.934211	KY320319	Nitzschia	Bacillariaceae	Bacillariales	Bacillariophyceae	species	['Nitzschia cf. paleacea']	Nitzschia cf. paleacea	2014780	aaacgttacttctgctactatggaagaagtatacaaacgtgctgagtacgctaaagaagttggttctgtaattgtt	20	0	0	0	0	0	0	0	0	0	0	0	0	0	0	20	0	0	0	0	0	0	0	0	0	0	0	0	0	0	0	0	0	0	0	0	0	0
Nitzschia cf. paleacea	0.947368	KY320319	Nitzschia	Bacillariaceae	Bacillariales	Bacillariophyceae	species	['Nitzschia cf. paleacea']	Nitzschia cf. paleacea	2014780	aaacattacttctgctactatggaagaagtatacaaacgtgctgagtacgctaaagaagttggttctgtaattatc	15	0	0	0	0	0	0	0	0	0	0	0	0	0	0	15	0	0	0	0	0	0	0	0	0	0	0	0	0	0	0	0	0	0	0	0	0	0
Nitzschia cf. paleacea	0.973684	KY320319	Nitzschia	Bacillariaceae	Bacillariales	Bacillariophyceae	species	['Nitzschia cf. paleacea']	Nitzschia cf. paleacea	2014780	aaacgttactgctgctactatggaagaagtatacaaacgtgctgagtacgctaaagaagttggttctgtaattatc	15	0	0	0	0	0	0	0	0	0	0	0	0	0	0	15	0	0	0	0	0	0	0	0	0	0	0	0	0	0	0	0	0	0	0	0	0	0
Nitzschia cf. paleacea	0.986842	KY320319	Nitzschia	Bacillariaceae	Bacillariales	Bacillariophyceae	species	['Nitzschia cf. paleacea']	Nitzschia cf. paleacea	2014780	aaatgtaactgctgccactatggaagaagtatacaaacgtgctgagtacgctaaagaagttggttctgtaattatc	11	0	0	0	0	0	0	0	0	0	0	0	0	0	0	11	0	0	0	0	0	0	0	0	0	0	0	0	0	0	0	0	0	0	0	0	0	0
Nitzschia cf. paleacea	0.960526	KY320319	Nitzschia	Bacillariaceae	Bacillariales	Bacillariophyceae	species	['Nitzschia cf. paleacea']	Nitzschia cf. paleacea	2014780	aaacgtaactgctgccactatggaagaagtttacaaacgtgctgagtacgctaaagaagttggttctgtaattatc	10	0	0	0	0	0	0	0	0	0	0	0	0	0	0	10	0	0	0	0	0	0	0	0	0	0	0	0	0	0	0	0	0	0	0	0	0	0
Nitzschia cf. paleacea	0.973684	KY320319	Nitzschia	Bacillariaceae	Bacillariales	Bacillariophyceae	species	['Nitzschia cf. paleacea']	Nitzschia cf. paleacea	2014780	aaacgtaactgctgccactatggaagaagtatacaaacgtgctgagtacgctaaagaagttggttctgtaattatc	10	0	0	0	0	0	0	0	0	0	0	0	0	0	0	10	0	0	0	0	0	0	0	0	0	0	0	0	0	0	0	0	0	0	0	0	0	0
Nitzschia dissipata	0.973684	KY320332	Nitzschia	Bacillariaceae	Bacillariales	Bacillariophyceae	species	['Nitzschia dissipata']	Nitzschia dissipata	303402	aaacgttacagctgcaactttagaagaaacttacaaacgtgcagaatatgctaaagaagtaggttctatcatcgtt	30	0	0	0	30	0	0	0	0	0	0	0	0	0	0	0	0	0	0	0	0	0	0	0	0	0	0	0	0	0	0	0	0	0	0	0	0	0
Nitzschia dubia	0.973684	KY320320	Nitzschia	Bacillariaceae	Bacillariales	Bacillariophyceae	species	['Nitzschia dubia']	Nitzschia dubia	2014774	aaacatcacaggcgcaactatggaagatgtatacgaacgtgctgagtatgctaaagaagtaggttctatcgtcgtt	15	0	0	0	0	0	0	0	0	0	0	0	0	0	0	0	0	0	0	0	0	0	0	0	15	0	0	0	0	0	0	0	0	0	0	0	0	0
Nitzschia fontifuga	0.948052	JX905669	Nitzschia	Bacillariaceae	Bacillariales	Bacillariophyceae	species	['Nitzschia fontifuga']	Nitzschia fontifuga	1259756	aaacatcacagcagctactatggaagaagtgtacaaacgtgctgagtacgctaaaacggttggttcaatcgtagtt	2101	0	0	0	0	0	27	0	13	0	0	0	0	2061	0	0	0	0	0	0	0	0	0	0	0	0	0	0	0	0	0	0	0	0	0	0	0	0
Nitzschia fontifuga	0.935065	JX905669	Nitzschia	Bacillariaceae	Bacillariales	Bacillariophyceae	species	['Nitzschia fontifuga']	Nitzschia fontifuga	1259756	aaacatcgcagcagctactatggaagaagtgtacaaacgtgctgagtacgctaaaacggttggttcaatcgtagtt	152	0	0	0	0	0	0	0	0	0	0	0	0	152	0	0	0	0	0	0	0	0	0	0	0	0	0	0	0	0	0	0	0	0	0	0	0	0
Nitzschia palea	0.986842	KJ542493	Nitzschia	Bacillariaceae	Bacillariales	Bacillariophyceae	species	['Nitzschia palea']	Nitzschia palea	303400	aaacgttacaggtgctacaatggaagacgtttacgaacgttctgagtacgctaaagaagtaggttctgtaattatt	44	0	0	0	0	0	0	0	0	0	0	0	0	23	0	0	0	0	0	0	0	0	0	0	0	0	0	0	0	0	0	0	0	21	0	0	0	0
Nitzschia paleaeformis	0.986842	KY320322	Nitzschia	Bacillariaceae	Bacillariales	Bacillariophyceae	species	['Nitzschia paleaeformis']	Nitzschia paleaeformis	2014777	aaacgttactgctgctactatggaaggagtataccaacgtgctgagtatgctaaagaagtaggttcaatcgttatt	239	0	12	0	80	0	0	68	0	51	0	0	0	17	0	0	0	0	0	0	0	0	0	11	0	0	0	0	0	0	0	0	0	0	0	0	0	0
Nitzschia sp. (in: Bacillariophyta)	0.947368	MH064121	Nitzschia	Bacillariaceae	Bacillariales	Bacillariophyceae	species	['Nitzschia sp. (in: Bacillariophyta)']	Nitzschia sp. (in: Bacillariophyta)	1884248	aaacgttacagctgctactatggaagaagttatcaaacgtgctgagtacgctaaagaagtaggttctgtagttatc	4963	0	0	0	0	0	0	0	0	212	116	0	0	109	1940	0	0	0	0	0	0	0	2586	0	0	0	0	0	0	0	0	0	0	0	0	0	0	0
Nitzschia sp. (in: Bacillariophyta)	0.947368	MH064121	Nitzschia	Bacillariaceae	Bacillariales	Bacillariophyceae	species	['Nitzschia sp. (in: Bacillariophyta)']	Nitzschia sp. (in: Bacillariophyta)	1884248	gaacgttacagctgctactatggaagaagttatcaaacgtgctgaatacgctaaagaagtaggttctgtagttatc	2547	0	0	0	0	0	0	18	213	0	49	0	0	596	1671	0	0	0	0	0	0	0	0	0	0	0	0	0	0	0	0	0	0	0	0	0	0	0
Nitzschia sp. (in: Bacillariophyta)	0.947368	MH064121	Nitzschia	Bacillariaceae	Bacillariales	Bacillariophyceae	species	['Nitzschia sp. (in: Bacillariophyta)']	Nitzschia sp. (in: Bacillariophyta)	1884248	aaacgttacagctgcaactatggaagaagtagttaaacgtgctgagtacgctaaagaagtaggttctgtagttatc	2094	0	0	0	0	0	0	0	0	49	0	0	0	0	0	0	88	0	0	0	0	0	18	0	0	0	0	0	0	0	0	0	0	0	0	0	1939	0
Nitzschia sp. (in: Bacillariophyta)	0.960526	MH064121	Nitzschia	Bacillariaceae	Bacillariales	Bacillariophyceae	species	['Nitzschia sp. (in: Bacillariophyta)']	Nitzschia sp. (in: Bacillariophyta)	1884248	aaacgttacagctgcaactatggaagaagtaattaaacgtgctgagtacgctaaagaagtaggttctgtagttatc	258	0	0	0	0	0	0	0	0	0	0	53	0	0	0	0	25	0	0	0	0	0	0	0	0	0	0	0	0	0	0	0	0	0	0	0	180	0
Nitzschia sp. (in: Bacillariophyta)	0.960526	MH064121	Nitzschia	Bacillariaceae	Bacillariales	Bacillariophyceae	species	['Nitzschia sp. (in: Bacillariophyta)']	Nitzschia sp. (in: Bacillariophyta)	1884248	aaacgttacagctgctactatggaagaagttatcaaacgtgctgaatacgctaaagaagtaggttctgtagttatc	17	0	0	0	0	0	0	0	0	0	0	0	0	0	17	0	0	0	0	0	0	0	0	0	0	0	0	0	0	0	0	0	0	0	0	0	0	0
Nitzschia sp. AnM0026	1	EU090049	Nitzschia	Bacillariaceae	Bacillariales	Bacillariophyceae	species	['Nitzschia sp. AnM0026']	Nitzschia sp. AnM0026	463624	aaacattactggcgcaactatggaagatgtatacgaacgtgctgagtatgctaaagaagtaggttctatcgttgtt	103	0	0	0	0	0	0	0	0	0	103	0	0	0	0	0	0	0	0	0	0	0	0	0	0	0	0	0	0	0	0	0	0	0	0	0	0	0
Odontella aurita	1	FJ002120	Odontella	Eupodiscaceae	Eupodiscales	Mediophyceae	species	['Odontella aurita']	Odontella aurita	265563	taacattactgcagctacaatggaagaagtttacaaacgtgctgagtacgcaaaagtagttggttctgtagtcgtt	26	0	0	0	0	0	0	0	0	0	13	0	0	0	0	0	0	0	0	0	0	0	0	0	0	0	0	0	0	0	0	0	0	0	0	13	0	0
Paralia	0.909091	KP150034	Paralia	Paraliaceae	Paraliales	Coscinodiscophyceae	genus	['Paralia guyana']	NA	216907	aaacatcacaggtgcaacaatggaagaagtttataaacgtggtgattatgctaaacaagttggttctatcgttgtg	28964	515	0	0	1338	62	403	391	594	560	0	1742	85	378	1662	0	0	201	481	171	682	1098	9779	157	0	0	1378	7287	0	0	0	0	0	0	0	0	0	0
Paralia	0.909091	KP150034	Paralia	Paraliaceae	Paraliales	Coscinodiscophyceae	genus	['Paralia guyana']	NA	216907	aaacatcacagatgcaacaatggaagaagtttataaacgtggtgattatgctaaacaagttggttctatcgttgtg	711	0	0	0	0	0	0	0	0	0	0	0	0	0	0	0	0	0	0	0	0	0	0	0	711	0	0	0	0	0	0	0	0	0	0	0	0	0
Petroneis humerosa	0.973684	AY571757	Petroneis	Lyrellaceae	Lyrellales	Bacillariophyceae	species	['Petroneis humerosa']	Petroneis humerosa	286111	aaacatcactgcaggtacaatggaagaagtttacaaacgtgctgagtacgctaaagctgttggttctatcgttgtt	473	0	0	0	0	0	0	0	0	0	0	0	0	0	0	0	0	0	0	0	0	0	0	0	473	0	0	0	0	0	0	0	0	0	0	0	0	0
Phaeosiphoniella cryophila	1	EF990254	Phaeosiphoniella	Tilopteridaceae	Tilopteridales	Phaeophyceae	species	['Phaeosiphoniella cryophila']	Phaeosiphoniella cryophila	112066	aaacattactgctgcaacagttgagcaaatgtacgaacgtgctgagtacgctcattcaattggtactgttattgta	582	0	0	0	0	0	0	0	0	0	0	0	0	0	0	0	0	0	0	0	0	0	0	0	0	0	547	23	0	0	0	0	0	12	0	0	0	0
Pinnularia	0.948052	KM349997	Pinnularia	Pinnulariaceae	Naviculales	Bacillariophyceae	genus	['Pinnularia sp. KEL-2015', 'Pinnularia neomajor', 'Pinnularia sp. NE-P12', 'Pinnularia viridiformis', 'Pinnularia viridis']	NA	216736	aaacatcactggtggtactatggaagaagtttatgaacgtgcagaatatgctaaagcagtaggttctgtagttgtt	75	0	0	0	0	0	0	0	0	0	0	0	0	0	0	0	0	0	0	0	0	0	0	75	0	0	0	0	0	0	0	0	0	0	0	0	0	0
Plagiogrammaceae	0.960526	KR048207	NA	Plagiogrammaceae	Triceratiales	Bacillariophyceae	family	['Plagiogramma sp. TN-2014', 'Dimeregramma sp. SZCZCH437', 'Dimeregramma sp. SZCZP42', 'Dimeregramma sp. SZCZP43', 'Dimeregramma sp. 28II10-1A-TXwinged', 'Plagiogramma sp. HK374', 'Dimeregramma minor']	NA	232509	aaacgtaacagctgcaacaatggaagaagtgtacaaacgtgctgagtatgctaaagctgttggttctgtaattgtt	13	0	0	0	0	0	0	0	0	0	0	0	0	0	0	0	0	0	0	0	0	0	0	0	0	13	0	0	0	0	0	0	0	0	0	0	0	0
Plagiogrammopsis vanheurckii	0.986842	KJ577907	Plagiogrammopsis	Cymatosiraceae	Cymatosirales	Mediophyceae	species	['Plagiogrammopsis vanheurckii']	Plagiogrammopsis vanheurckii	1234821	aaacgtaacagctgcgactatggaagaagtttacaaacgttctgagtacgctaagaaagttggttctgtaattatc	202	0	0	0	0	0	202	0	0	0	0	0	0	0	0	0	0	0	0	0	0	0	0	0	0	0	0	0	0	0	0	0	0	0	0	0	0	0
Porosira	1	DQ108387	Porosira	Thalassiosiraceae	Thalassiosirales	Mediophyceae	genus	[]	NA	49259	aaacgttacagctgccactatggaagaagtatacaaacgtgctgagtatgctagagtagttggttctgttgttgta	632619	4893	2725	5383	22743	2483	3777	6483	5866	12061	1957	16889	11316	7138	7368	8496	464	1435	3929	1980	3346	0	8208	2853	34609	3829	8474	0	6669	0	17658	34197	48067	51460	99611	84178	38136	63938
Porosira	0.986842	DQ108387	Porosira	Thalassiosiraceae	Thalassiosirales	Mediophyceae	genus	[]	NA	49259	aaatgttacagctgccactatggaagaagtatacaaacgtgctgagtatgctagagtagttggttctgttgttgta	2622	17	0	255	0	0	70	0	0	378	0	0	0	0	0	0	0	0	0	0	0	0	0	0	18	0	0	0	0	0	0	0	1770	15	37	25	12	25
Porosira	0.986842	DQ108387	Porosira	Thalassiosiraceae	Thalassiosirales	Mediophyceae	genus	[]	NA	49259	aaacgttacggctgccactatggaagaagtatacaaacgtgctgagtatgctagagtagttggttctgttgttgta	2136	0	0	17	39	0	0	59	12	25	0	28	44	13	10	21	0	0	0	0	0	0	0	0	63	0	17	0	0	0	30	1118	133	82	132	147	63	83
Porosira	0.986842	DQ108387	Porosira	Thalassiosiraceae	Thalassiosirales	Mediophyceae	genus	[]	NA	49259	aaacattacagctgccactatggaagaagtatacaaacgtgctgagtatgctagagtagttggttctgttgttgta	1840	22	11	27	87	10	19	18	13	18	0	23	33	20	11	17	0	0	0	14	0	0	0	0	31	22	1245	0	0	0	0	52	20	25	32	32	10	28
Porosira	0.986842	DQ108387	Porosira	Thalassiosiraceae	Thalassiosirales	Mediophyceae	genus	[]	NA	49259	aaacgttacagctgccactatagaagaagtatacaaacgtgctgagtatgctagagtagttggttctgttgttgta	1767	0	45	0	17	109	0	34	0	0	0	0	0	0	0	0	0	0	0	0	0	0	0	0	20	0	0	0	0	0	0	18	1386	17	49	29	13	30
Porosira	0.986842	DQ108387	Porosira	Thalassiosiraceae	Thalassiosirales	Mediophyceae	genus	[]	NA	49259	aaacgttacagctgccactatggaagaagtatacaaacgtgctgagtatgctagagtagttggttctgttgctgta	1063	19	0	11	41	0	0	0	10	18	0	23	28	0	16	17	0	0	0	0	184	0	0	0	42	0	30	0	10	0	18	33	88	80	151	123	44	77
Porosira	0.986842	DQ108387	Porosira	Thalassiosiraceae	Thalassiosirales	Mediophyceae	genus	[]	NA	49259	aaacgttacagctgccactatggaagaagtatacaaacgtgctgagtatgctagagtagttggttctgttgttgtt	1050	43	16	35	89	22	41	43	33	52	23	49	90	40	29	55	0	11	11	15	0	0	0	24	74	34	0	0	0	0	14	48	13	25	37	52	12	20
Porosira	0.986842	DQ108387	Porosira	Thalassiosiraceae	Thalassiosirales	Mediophyceae	genus	[]	NA	49259	aaacgttacagctgccactatggaagaagtatacagacgtgctgagtatgctagagtagttggttctgttgttgta	960	0	0	14	30	0	28	0	0	21	0	90	25	0	0	14	0	0	0	0	0	0	0	0	51	0	18	0	0	0	19	40	113	67	129	108	49	144
Porosira	0.986842	DQ108387	Porosira	Thalassiosiraceae	Thalassiosirales	Mediophyceae	genus	[]	NA	49259	aaacgttacagctgccactatggaagaagtatacaaacgtgccgagtatgctagagtagttggttctgttgttgta	874	0	0	0	77	0	0	0	0	10	0	23	14	0	13	0	0	0	0	0	0	0	0	144	39	0	13	0	10	0	11	51	53	55	93	170	34	64
Porosira	0.986842	DQ108387	Porosira	Thalassiosiraceae	Thalassiosirales	Mediophyceae	genus	[]	NA	49259	aaacgttacagctgccactatggaagaagtatacaaacgtgctgagtacgctagagtagttggttctgttgttgta	842	35	0	0	36	0	0	22	0	13	0	15	30	0	0	10	0	0	0	0	0	0	10	0	121	0	0	0	0	0	50	57	74	73	114	104	35	43
Porosira	0.986842	DQ108387	Porosira	Thalassiosiraceae	Thalassiosirales	Mediophyceae	genus	[]	NA	49259	aaacgttacagctgccactatggaagaagtatacaaacgtgttgagtatgctagagtagttggttctgttgttgta	826	0	0	0	0	25	0	42	0	0	172	333	0	0	0	61	0	0	0	0	0	0	0	0	17	0	0	0	0	0	0	0	16	31	56	27	27	19
Porosira	0.986842	DQ108387	Porosira	Thalassiosiraceae	Thalassiosirales	Mediophyceae	genus	[]	NA	49259	aaacgttacagttgccactatggaagaagtatacaaacgtgctgagtatgctagagtagttggttctgttgttgta	766	0	0	0	33	0	0	156	0	0	0	0	0	0	0	0	0	0	0	0	0	0	0	0	369	0	0	0	0	0	10	13	15	15	32	80	11	32
Porosira	0.986842	DQ108387	Porosira	Thalassiosiraceae	Thalassiosirales	Mediophyceae	genus	[]	NA	49259	aaacgttacagctgtcactatggaagaagtatacaaacgtgctgagtatgctagagtagttggttctgttgttgta	719	0	0	0	39	0	0	0	0	0	0	0	0	0	0	180	0	301	0	0	0	0	0	0	18	0	0	0	0	0	0	18	23	14	44	37	16	29
Porosira	0.986842	DQ108387	Porosira	Thalassiosiraceae	Thalassiosirales	Mediophyceae	genus	[]	NA	49259	aaacgttacagctgccactatggaagaagtatacaaatgtgctgagtatgctagagtagttggttctgttgttgta	663	230	0	0	95	29	0	0	0	0	0	0	0	0	0	0	0	0	11	0	0	0	0	0	16	0	0	0	0	0	0	12	62	11	91	31	12	63
Porosira	0.986842	DQ108387	Porosira	Thalassiosiraceae	Thalassiosirales	Mediophyceae	genus	[]	NA	49259	aaacgttacagctgctactatggaagaagtatacaaacgtgctgagtatgctagagtagttggttctgttgttgta	623	0	0	0	47	0	0	0	0	0	0	0	341	0	0	0	0	0	0	0	0	0	0	0	18	0	28	0	0	0	11	22	24	17	44	32	18	21
Porosira	0.986842	DQ108387	Porosira	Thalassiosiraceae	Thalassiosirales	Mediophyceae	genus	[]	NA	49259	aaacgttacagctgccactatggaagaagtatacaaacgtgctgagtatgctggagtagttggttctgttgttgta	590	0	0	0	43	0	12	0	0	18	0	19	0	10	0	11	0	0	0	0	0	0	0	0	39	0	11	0	0	0	11	46	51	53	117	51	51	47
Porosira	0.986842	DQ108387	Porosira	Thalassiosiraceae	Thalassiosirales	Mediophyceae	genus	[]	NA	49259	aaacgtcacagctgccactatggaagaagtatacaaacgtgctgagtatgctagagtagttggttctgttgttgta	587	0	0	0	17	0	0	0	0	12	0	0	12	0	0	12	0	0	0	0	0	0	0	0	32	0	13	0	0	0	14	18	43	72	72	186	28	56
Porosira	0.986842	DQ108387	Porosira	Thalassiosiraceae	Thalassiosirales	Mediophyceae	genus	[]	NA	49259	aaacgttacagctgccactatggaagaagtatacaaacgtgctgagtatgctagaatagttggttctgttgttgta	574	0	0	0	0	0	0	0	0	15	182	0	283	0	0	0	0	0	0	0	0	0	0	0	0	0	0	0	0	0	0	18	11	28	25	0	0	12
Porosira	0.947368	DQ108387	Porosira	Thalassiosiraceae	Thalassiosirales	Mediophyceae	genus	[]	NA	49259	aaacattactgctgcgacaatggaagaagtatacaaacgtgctgagtatgctagagtagttggttctgttgttgta	535	12	15	41	49	11	20	0	0	0	0	42	104	14	0	20	0	15	10	20	0	0	0	0	17	17	0	0	0	0	0	44	0	0	17	39	0	28
Porosira	0.973684	DQ108387	Porosira	Thalassiosiraceae	Thalassiosirales	Mediophyceae	genus	[]	NA	49259	aaacgttacagctgccactatggaagaagtatacaaacgtgctgagtatgctagagtagttggttctgtagttgtt	522	14	19	31	56	23	32	11	10	0	11	36	71	26	0	33	12	14	0	21	0	0	0	0	26	11	0	0	0	0	0	33	0	0	0	17	0	15
Porosira	0.960526	DQ108387	Porosira	Thalassiosiraceae	Thalassiosirales	Mediophyceae	genus	[]	NA	49259	aaacgttacagctgttattatggaagaagtatacaaacgtgctgagtatgctagagtagttggttctgttgttgta	480	0	0	0	0	0	0	0	0	0	0	0	0	0	0	0	0	0	0	0	0	0	0	0	0	0	480	0	0	0	0	0	0	0	0	0	0	0
Porosira	0.986842	DQ108387	Porosira	Thalassiosiraceae	Thalassiosirales	Mediophyceae	genus	[]	NA	49259	aaacgttacagctgccactatggaagaagtatacaaacgtgctgagtatgctagagtagttggttctgttattgta	436	0	0	55	0	0	0	0	0	0	0	0	0	0	0	0	0	0	0	0	0	0	0	0	13	0	0	0	0	0	0	11	23	17	32	21	10	254
Porosira	0.960526	DQ108387	Porosira	Thalassiosiraceae	Thalassiosirales	Mediophyceae	genus	[]	NA	49259	aaacgttacagctgccactatggaagaagtatacaaacgttctgagtatgctagagcagttggttctgttgttata	436	0	0	0	12	118	0	0	18	0	40	0	227	0	0	21	0	0	0	0	0	0	0	0	0	0	0	0	0	0	0	0	0	0	0	0	0	0
Porosira	0.986842	DQ108387	Porosira	Thalassiosiraceae	Thalassiosirales	Mediophyceae	genus	[]	NA	49259	aaacgttacagctgccactgtggaagaagtatacaaacgtgctgagtatgctagagtagttggttctgttgttgta	409	0	0	0	21	0	0	0	0	0	0	42	10	0	0	0	0	0	0	0	0	0	0	0	33	0	0	0	0	0	11	18	41	38	89	49	14	43
Porosira	0.960526	DQ108387	Porosira	Thalassiosiraceae	Thalassiosirales	Mediophyceae	genus	[]	NA	49259	aaacattacagctgcgacaatggaagaagtatacaaacgtgctgagtatgctagagtagttggttctgttgttgta	349	12	12	54	43	0	20	0	0	0	0	0	13	11	13	17	0	0	0	18	0	0	0	0	38	26	0	0	0	0	0	72	0	0	0	0	0	0
Porosira	0.986842	DQ108387	Porosira	Thalassiosiraceae	Thalassiosirales	Mediophyceae	genus	[]	NA	49259	aaacgttacagctgccactatggaagaagtatacaaacgtgctaagtatgctagagtagttggttctgttgttgta	325	0	25	0	27	17	64	0	0	0	0	0	0	0	0	0	0	0	0	0	0	0	13	0	14	0	0	0	0	0	0	17	14	19	53	27	11	24
Porosira	0.960526	DQ108387	Porosira	Thalassiosiraceae	Thalassiosirales	Mediophyceae	genus	[]	NA	49259	aaacatcacagctgctactatggaagaagtatacaaacgtgctgagtatgctagagtagttggttctgttgttgta	306	0	0	20	27	0	17	0	0	0	0	30	68	29	16	99	0	0	0	0	0	0	0	0	0	0	0	0	0	0	0	0	0	0	0	0	0	0
Porosira	0.947368	DQ108387	Porosira	Thalassiosiraceae	Thalassiosirales	Mediophyceae	genus	[]	NA	49259	aaacatcacagcggctactatggaagaagtatacaaacgtgctgagtatgctagagtagttggttctgttgttgta	284	0	0	27	29	0	16	0	0	0	0	24	46	35	0	43	0	0	0	14	0	0	0	12	13	10	0	0	0	0	0	15	0	0	0	0	0	0
Porosira	0.986842	DQ108387	Porosira	Thalassiosiraceae	Thalassiosirales	Mediophyceae	genus	[]	NA	49259	aaacgttactgctgccactatggaagaagtatacaaacgtgctgagtatgctagagtagttggttctgttgttgta	247	0	0	0	0	0	0	0	0	0	0	11	0	0	0	0	0	0	0	0	0	0	0	0	17	0	0	0	0	0	0	10	16	17	32	15	14	115
Porosira	0.960526	DQ108387	Porosira	Thalassiosiraceae	Thalassiosirales	Mediophyceae	genus	[]	NA	49259	aaacgttactgcagctactatggaagaagtatacaaacgtgctgagtatgctagagtagttggttctgttgttgta	244	12	0	13	21	0	0	0	0	0	0	37	45	24	10	26	0	0	0	0	0	0	0	0	15	0	0	0	0	0	0	0	0	0	27	0	0	14
Porosira	0.986842	DQ108387	Porosira	Thalassiosiraceae	Thalassiosirales	Mediophyceae	genus	[]	NA	49259	aaacgttacagctgccactatggaagaagtatacaaacgtgctgagtatgttagagtagttggttctgttgttgta	184	0	13	0	0	0	0	0	0	0	0	0	0	0	0	0	0	0	0	0	0	0	0	0	18	0	0	0	0	0	0	11	23	28	38	19	13	21
Porosira	0.986842	DQ108387	Porosira	Thalassiosiraceae	Thalassiosirales	Mediophyceae	genus	[]	NA	49259	aaacgttacagctgcaactatggaagaagtatacaaacgtgctgagtatgctagagtagttggttctgttgttgta	171	0	0	0	15	0	0	0	0	0	0	0	0	0	0	0	0	0	0	0	0	0	0	0	15	0	0	0	0	0	0	22	16	22	33	30	0	18
Porosira	0.986842	DQ108387	Porosira	Thalassiosiraceae	Thalassiosirales	Mediophyceae	genus	[]	NA	49259	aaacgttacagctgccactatggaagaagtatacaaacgtgctgagtatgctagagtagttggttctgtagttgta	143	0	0	0	0	0	0	0	0	0	0	0	0	10	0	0	0	0	0	0	0	0	0	0	0	0	0	0	0	0	0	16	21	22	34	24	0	16
Porosira	0.986842	DQ108387	Porosira	Thalassiosiraceae	Thalassiosirales	Mediophyceae	genus	[]	NA	49259	aaacgttacagctgcgactatggaagaagtatacaaacgtgctgagtatgctagagtagttggttctgttgttgta	133	0	0	0	0	0	0	0	0	0	0	0	0	0	0	0	0	0	0	0	0	0	0	0	18	0	0	0	0	0	0	0	14	24	24	26	11	16
Porosira	0.947368	DQ108387	Porosira	Thalassiosiraceae	Thalassiosirales	Mediophyceae	genus	[]	NA	49259	aaacattactgctgcgacgatggaagaagtatacaaacgtgctgagtatgctagagtagttggttctgttgttgta	88	0	11	17	21	0	12	0	0	0	0	0	0	0	0	0	0	0	0	0	0	0	0	0	13	14	0	0	0	0	0	0	0	0	0	0	0	0
Porosira	0.934211	DQ108387	Porosira	Thalassiosiraceae	Thalassiosirales	Mediophyceae	genus	[]	NA	49259	aaacgttacagctgctacaatggaagaaacatacaagcgtgctgagtatgctagagtagttggttctgttgttgta	85	0	0	0	0	0	0	0	13	13	0	18	26	15	0	0	0	0	0	0	0	0	0	0	0	0	0	0	0	0	0	0	0	0	0	0	0	0
Porosira	0.973684	DQ108387	Porosira	Thalassiosiraceae	Thalassiosirales	Mediophyceae	genus	[]	NA	49259	aaacgttacagttgccaccatggaagaagtatacaaacgtgctgagtatgctagagtagttggttctgttgttgta	78	0	0	0	0	0	0	78	0	0	0	0	0	0	0	0	0	0	0	0	0	0	0	0	0	0	0	0	0	0	0	0	0	0	0	0	0	0
Porosira	0.960526	DQ108387	Porosira	Thalassiosiraceae	Thalassiosirales	Mediophyceae	genus	[]	NA	49259	aaacgttacttctgctactatggaagaagtatacaaacgtgctgagtatgctagagtagttggttctgttgttgta	61	0	0	0	0	0	0	0	0	0	0	0	0	0	0	61	0	0	0	0	0	0	0	0	0	0	0	0	0	0	0	0	0	0	0	0	0	0
Porosira	0.973684	DQ108387	Porosira	Thalassiosiraceae	Thalassiosirales	Mediophyceae	genus	[]	NA	49259	aaacgtaactgctgccactatggaagaagtatacaaacgtgctgagtatgctagagtagttggttctgttgttgta	59	0	0	0	0	0	0	0	0	0	0	0	0	0	0	17	0	0	0	0	0	0	0	0	0	0	0	0	0	0	0	26	0	0	16	0	0	0
Porosira	0.986842	DQ108387	Porosira	Thalassiosiraceae	Thalassiosirales	Mediophyceae	genus	[]	NA	49259	aaacgttacagctgccacaatggaagaagtatacaaacgtgctgagtatgctagagtagttggttctgttgttgta	58	0	0	0	0	0	0	0	0	0	0	0	0	0	0	0	0	0	0	0	0	0	0	0	11	0	0	0	0	0	0	0	13	10	12	12	0	0
Porosira	0.960526	DQ108387	Porosira	Thalassiosiraceae	Thalassiosirales	Mediophyceae	genus	[]	NA	49259	aaacgttacagctgccactatggaagaagtatacaaacgtgctgagtatgctagagtagttggttctatcgttgtt	38	0	0	0	0	0	0	0	10	0	0	13	15	0	0	0	0	0	0	0	0	0	0	0	0	0	0	0	0	0	0	0	0	0	0	0	0	0
Porosira	0.973684	DQ108387	Porosira	Thalassiosiraceae	Thalassiosirales	Mediophyceae	genus	[]	NA	49259	aaacgttacagctgctacaatggaagaagtatacaaacgtgctgagtatgctagagtagttggttctgttgttgta	38	0	0	0	0	0	0	0	0	0	0	25	13	0	0	0	0	0	0	0	0	0	0	0	0	0	0	0	0	0	0	0	0	0	0	0	0	0
Porosira	0.973684	DQ108387	Porosira	Thalassiosiraceae	Thalassiosirales	Mediophyceae	genus	[]	NA	49259	aaacgttacagccgccactatggaagaagtatacaaacgtgccgagtatgctagagtagttggttctgttgttgta	36	0	0	0	0	0	0	0	0	0	0	0	0	0	0	0	0	0	0	0	0	0	0	36	0	0	0	0	0	0	0	0	0	0	0	0	0	0
Porosira	0.973684	DQ108387	Porosira	Thalassiosiraceae	Thalassiosirales	Mediophyceae	genus	[]	NA	49259	aaacgttacagctgccactatggaagaagtatacaaacgcgctgagtatgccagagtagttggttctgttgttgta	33	0	0	0	0	0	0	0	0	0	0	0	0	0	0	0	0	0	0	0	0	0	0	0	0	0	0	0	0	0	0	0	0	0	33	0	0	0
Porosira	0.973684	DQ108387	Porosira	Thalassiosiraceae	Thalassiosirales	Mediophyceae	genus	[]	NA	49259	aaacgttacagctgccactatgaaagaagtatacaaacgtgctgagtatgctagagtagttggttctgttattgta	33	33	0	0	0	0	0	0	0	0	0	0	0	0	0	0	0	0	0	0	0	0	0	0	0	0	0	0	0	0	0	0	0	0	0	0	0	0
Porosira	0.973684	DQ108387	Porosira	Thalassiosiraceae	Thalassiosirales	Mediophyceae	genus	[]	NA	49259	aaacgttacagcagctactatggaagaagtatacaaacgtgctgagtatgctagagtagttggttctgttgttgta	28	0	0	11	0	0	0	0	0	0	0	0	17	0	0	0	0	0	0	0	0	0	0	0	0	0	0	0	0	0	0	0	0	0	0	0	0	0
Porosira	0.935065	DQ108387	Porosira	Thalassiosiraceae	Thalassiosirales	Mediophyceae	genus	[]	NA	49259	aaacattacagctgcaactcaagaagaagtatacaaacgtgctgagtatgctagagtagttggttctgttgttgta	27	0	0	0	0	0	0	0	0	0	0	0	0	0	0	0	0	0	0	0	0	0	0	0	0	27	0	0	0	0	0	0	0	0	0	0	0	0
Porosira	0.921053	DQ108387	Porosira	Thalassiosiraceae	Thalassiosirales	Mediophyceae	genus	[]	NA	49259	aaacgttacttctgctactatggaagaagtatacaaacgtgctgagtacgctaaagaagttggttctgttgttgta	26	0	0	0	0	0	0	0	0	0	0	0	0	0	0	26	0	0	0	0	0	0	0	0	0	0	0	0	0	0	0	0	0	0	0	0	0	0
Porosira	0.960526	DQ108387	Porosira	Thalassiosiraceae	Thalassiosirales	Mediophyceae	genus	[]	NA	49259	aaacgtaactgctgccactatggaagaagtttacaaacgtgctgagtatgctagagtagttggttctgttgttgta	25	0	0	0	0	0	0	0	0	0	0	0	0	0	0	0	0	0	0	0	0	0	0	0	0	0	0	0	0	0	0	13	0	0	12	0	0	0
Porosira	0.947368	DQ108387	Porosira	Thalassiosiraceae	Thalassiosirales	Mediophyceae	genus	[]	NA	49259	aaacgttacagctgccactatggaagaagtatacaaacgtgctgagtatgctagagtagttggttctgtaattatc	25	0	0	0	0	0	0	0	0	0	0	0	0	0	0	25	0	0	0	0	0	0	0	0	0	0	0	0	0	0	0	0	0	0	0	0	0	0
Porosira	0.948052	DQ108387	Porosira	Thalassiosiraceae	Thalassiosirales	Mediophyceae	genus	[]	NA	49259	aaacgttacagctgccactatggaagaagtatacaaacgtgctgagtatgctaaagctattggttctgtagttgta	25	0	0	0	0	0	0	0	0	0	0	0	11	14	0	0	0	0	0	0	0	0	0	0	0	0	0	0	0	0	0	0	0	0	0	0	0	0
Porosira	0.973684	DQ108387	Porosira	Thalassiosiraceae	Thalassiosirales	Mediophyceae	genus	[]	NA	49259	aagcgttacagctgcctctatggaagaagtatacaaacgtgctgagtatgctagagtagttggttctgttgttgta	21	0	0	0	0	0	21	0	0	0	0	0	0	0	0	0	0	0	0	0	0	0	0	0	0	0	0	0	0	0	0	0	0	0	0	0	0	0
Porosira	0.973684	DQ108387	Porosira	Thalassiosiraceae	Thalassiosirales	Mediophyceae	genus	[]	NA	49259	aaacatcacagctgccactatggaagaagtatacaaacgtgctgagtatgctagagtagttggttctgttgttgta	20	0	0	0	10	0	0	0	0	0	0	0	10	0	0	0	0	0	0	0	0	0	0	0	0	0	0	0	0	0	0	0	0	0	0	0	0	0
Porosira	0.947368	DQ108387	Porosira	Thalassiosiraceae	Thalassiosirales	Mediophyceae	genus	[]	NA	49259	aaacgttacagctgccactatggaagaagtatacaaacgttctgagtatgctagagcagttggttccgttgttata	19	0	0	0	0	0	0	0	0	0	0	0	19	0	0	0	0	0	0	0	0	0	0	0	0	0	0	0	0	0	0	0	0	0	0	0	0	0
Porosira	0.922078	DQ108387	Porosira	Thalassiosiraceae	Thalassiosirales	Mediophyceae	genus	[]	NA	49259	aaacattacagctgcaactcaagaagaagtctacaaacgtgctgagtatgctagagtagttggttctgttgttgta	14	0	0	0	0	0	0	0	0	0	0	0	0	0	0	0	0	0	0	0	0	0	0	0	0	0	0	0	0	0	0	14	0	0	0	0	0	0
Porosira	0.973684	DQ108387	Porosira	Thalassiosiraceae	Thalassiosirales	Mediophyceae	genus	[]	NA	49259	aaacgttacagctgccactatggaagaagtatacaaacgtgctgagtatgcaagaatagttggttctgttgttgta	14	0	0	0	0	0	0	0	0	0	0	0	0	0	0	0	0	0	0	0	0	0	0	0	0	0	0	0	0	0	0	0	0	0	14	0	0	0
Porosira	0.973684	DQ108387	Porosira	Thalassiosiraceae	Thalassiosirales	Mediophyceae	genus	[]	NA	49259	aaacgttacagctgccactatggaagaagtatacaaacgttctgagtatgctagagcagttggttctgttgttgta	12	0	0	0	0	0	0	0	0	0	0	0	12	0	0	0	0	0	0	0	0	0	0	0	0	0	0	0	0	0	0	0	0	0	0	0	0	0
Porosira	0.960526	DQ108387	Porosira	Thalassiosiraceae	Thalassiosirales	Mediophyceae	genus	[]	NA	49259	aaatgtaactgctgccactatggaagaagtatacaaacgtgctgagtatgctagagtagttggttctgttgttgta	11	0	0	0	0	0	0	0	0	0	0	0	0	0	0	11	0	0	0	0	0	0	0	0	0	0	0	0	0	0	0	0	0	0	0	0	0	0
Porosira	0.973684	DQ108387	Porosira	Thalassiosiraceae	Thalassiosirales	Mediophyceae	genus	[]	NA	49259	aaacattacagctgctactatggaagaagtatacaaacgtgctgagtatgctagagtagttggttctgttgttgta	10	0	0	0	0	0	0	0	0	0	0	0	0	0	0	0	0	0	0	0	0	0	0	0	0	10	0	0	0	0	0	0	0	0	0	0	0	0
Porosira	0.960526	DQ108387	Porosira	Thalassiosiraceae	Thalassiosirales	Mediophyceae	genus	[]	NA	49259	aaacgtaacagctgcaacaatggaagaagtatacaaacgtgctgagtatgctagagtagttggttctgttgttgta	10	0	0	0	0	0	0	0	0	0	0	0	0	0	0	0	0	0	0	0	0	0	0	0	0	10	0	0	0	0	0	0	0	0	0	0	0	0
Porosira	0.947368	DQ108387	Porosira	Thalassiosiraceae	Thalassiosirales	Mediophyceae	genus	[]	NA	49259	aaacgttacagctgctacaatggaagaaacatacaaacgtgctgagtatgctagagtagttggttctgttgttgta	10	0	0	0	0	0	0	0	0	0	0	0	10	0	0	0	0	0	0	0	0	0	0	0	0	0	0	0	0	0	0	0	0	0	0	0	0	0
Pseudogomphonema	0.986842	AY571748	Pseudogomphonema	Naviculaceae	Naviculales	Bacillariophyceae	genus	[]	NA	210610	taacgttactgcagctactatggaagaagtgtacaaacgtgcagaatacgctaaaaccgttggttctatcgttgtt	825	0	0	0	0	0	0	61	0	0	0	0	0	0	0	0	0	0	0	0	0	0	34	0	0	0	730	0	0	0	0	0	0	0	0	0	0	0
Pseudo-nitzschia	0.973684	DQ813818	Pseudo-nitzschia	Bacillariaceae	Bacillariales	Bacillariophyceae	genus	['Pseudo-nitzschia delicatissima', 'Pseudo-nitzschia arenysensis', 'Pseudo-nitzschia sp. 3BOF']	NA	41953	aaacgttacagctgccactatggaagaagtaattaagcgttgtgaatatgctaaagacgtaggttctgtagttgtt	7776	0	0	0	0	0	0	0	0	0	0	0	0	0	0	0	0	0	0	0	0	0	0	0	0	0	0	0	0	0	0	0	0	0	0	0	7776	0
Pseudo-nitzschia	1	JN162808	Pseudo-nitzschia	Bacillariaceae	Bacillariales	Bacillariophyceae	genus	[]	NA	41953	aaacgttacagcttcgactatggacgaagtaattaagcgtgctgaatacgctaaagacgtaggttctgtagttgtt	4835	0	23	0	118	0	0	361	63	353	0	0	0	0	0	0	0	187	0	0	0	0	0	179	0	0	197	816	0	0	0	0	203	0	0	0	66	2269
Pseudo-nitzschia	0.986842	JN162808	Pseudo-nitzschia	Bacillariaceae	Bacillariales	Bacillariophyceae	genus	[]	NA	41953	aaacgttacagcttcgactatggacgaagtacttaagcgtgctgaatacgctaaagacgtaggttctgtagttgtt	1945	0	0	0	0	0	0	0	0	0	0	0	0	0	0	0	0	41	0	19	1885	0	0	0	0	0	0	0	0	0	0	0	0	0	0	0	0	0
Pseudo-nitzschia	1	KP757864	Pseudo-nitzschia	Bacillariaceae	Bacillariales	Bacillariophyceae	genus	[]	NA	41953	aaacgttacagctgcaactatggaagaagttcttaagcgttgtgaatatgctaaagaagtaggttctatcgttgtt	1301	0	0	0	0	0	0	0	0	0	0	0	0	0	0	0	0	0	0	0	0	0	64	65	1132	0	0	0	0	0	0	0	0	0	0	0	40	0
Pseudo-nitzschia	0.960526	DQ813818	Pseudo-nitzschia	Bacillariaceae	Bacillariales	Bacillariophyceae	genus	['Pseudo-nitzschia dolorosa', 'Pseudo-nitzschia arenysensis', 'Pseudo-nitzschia sp. 3BOF', 'Pseudo-nitzschia pseudodelicatissima', 'Pseudo-nitzschia delicatissima']	NA	41953	aaacgttacagctgccactatggaagaagtacttaagcgttgtgaatatgctaaagacgtaggttctgtagttgtt	1103	0	0	25	0	0	0	0	0	0	11	0	0	0	0	0	0	13	22	323	0	0	11	0	0	0	0	32	0	654	0	12	0	0	0	0	0	0
Pseudo-nitzschia	0.960526	DQ813817	Pseudo-nitzschia	Bacillariaceae	Bacillariales	Bacillariophyceae	genus	['Pseudo-nitzschia cuspidata', 'Pseudo-nitzschia dolorosa', 'Pseudo-nitzschia arenysensis', 'Pseudo-nitzschia sp. 3BOF', 'Pseudo-nitzschia pseudodelicatissima', 'Pseudo-nitzschia delicatissima']	NA	41953	aaacgttacagctgccactatggaagaagtaattaagcgttgtgagtatgctaaagacgtaggttctgtagttgtt	27	0	0	0	0	0	0	0	0	0	0	0	0	0	0	0	0	0	17	0	0	0	0	0	0	0	0	0	0	0	0	0	0	0	0	0	10	0
Pseudo-nitzschia caciantha	0.934211	DQ813821	Pseudo-nitzschia	Bacillariaceae	Bacillariales	Bacillariophyceae	species	['Pseudo-nitzschia caciantha']	Pseudo-nitzschia caciantha	237457	aaacgttacagctgcaactatggaagaagttattaagcgttgtgagtacgctaaatctgtaggttctatcgttgtt	27	0	0	0	0	27	0	0	0	0	0	0	0	0	0	0	0	0	0	0	0	0	0	0	0	0	0	0	0	0	0	0	0	0	0	0	0	0
Pseudo-nitzschia fryxelliana	0.986842	JN050302	Pseudo-nitzschia	Bacillariaceae	Bacillariales	Bacillariophyceae	species	['Pseudo-nitzschia fryxelliana']	Pseudo-nitzschia fryxelliana	1041511	aaacgttacagctgctactatggacgaagttcttaagcgttgtgaatacgctaaagaagtaggttctgtagttgtt	564	0	0	0	0	0	0	0	0	0	0	0	0	0	0	0	0	0	0	0	0	0	0	0	0	564	0	0	0	0	0	0	0	0	0	0	0	0
Pseudo-nitzschia galaxiae	0.986842	EF423511	Pseudo-nitzschia	Bacillariaceae	Bacillariales	Bacillariophyceae	species	['Pseudo-nitzschia galaxiae']	Pseudo-nitzschia galaxiae	189737	aaacgttacagctgctacaatggaagaagtaattaaacgttgtgaatacgctaaagaagtaggttctattgttgtt	652	0	0	0	0	0	0	0	0	0	0	0	0	0	0	0	0	0	0	0	0	0	0	0	0	652	0	0	0	0	0	0	0	0	0	0	0	0
Pseudo-nitzschia granii	1	KU183494	Pseudo-nitzschia	Bacillariaceae	Bacillariales	Bacillariophyceae	species	['Pseudo-nitzschia granii']	Pseudo-nitzschia granii	476440	aaacgttacagctgcaactatggaagaagttctaaaacgttgtgagtatgctaaatcagtaggttctatcgttgta	51964	0	0	0	44	49	15	0	0	635	74	0	0	44	0	16	78	286	0	154	172	0	57	509	0	7508	8036	32294	114	1664	0	0	0	215	0	0	0	0
Pseudo-nitzschia granii	0.973684	KU183494	Pseudo-nitzschia	Bacillariaceae	Bacillariales	Bacillariophyceae	species	['Pseudo-nitzschia granii']	Pseudo-nitzschia granii	476440	aaacgttatagctgcaactatggaagaagttctaaaacgttgtgagtatgttaaatcagtaggttctatcgttgta	4493	0	0	0	0	0	0	0	0	0	0	0	0	0	0	0	0	0	0	0	0	0	0	0	0	4493	0	0	0	0	0	0	0	0	0	0	0	0
Pseudo-nitzschia granii	0.986842	KU183494	Pseudo-nitzschia	Bacillariaceae	Bacillariales	Bacillariophyceae	species	['Pseudo-nitzschia granii']	Pseudo-nitzschia granii	476440	aaacgttacagctgcaactatggaggaagttctaaaacgttgtgagtatgctaaatcagtaggttctatcgttgta	96	0	0	0	0	0	0	0	0	0	0	0	0	0	0	0	0	0	0	0	0	0	0	0	0	10	19	67	0	0	0	0	0	0	0	0	0	0
Pseudo-nitzschia granii	0.986842	KU183494	Pseudo-nitzschia	Bacillariaceae	Bacillariales	Bacillariophyceae	species	['Pseudo-nitzschia granii']	Pseudo-nitzschia granii	476440	aaacattacagctgcaactatggaagaagttctaaaacgttgtgagtatgctaaatcagtaggttctatcgttgta	93	0	0	0	0	0	0	0	0	0	0	0	0	0	0	0	0	0	0	0	0	0	0	0	0	52	0	41	0	0	0	0	0	0	0	0	0	0
Pseudo-nitzschia granii	0.986842	KU183494	Pseudo-nitzschia	Bacillariaceae	Bacillariales	Bacillariophyceae	species	['Pseudo-nitzschia granii']	Pseudo-nitzschia granii	476440	aaacgttatagctgcaactatggaagaagttctaaaacgttgtgagtatgctaaatcagtaggttctatcgttgta	90	0	0	0	0	0	0	0	0	0	0	0	0	0	0	0	0	0	0	0	0	0	0	0	0	90	0	0	0	0	0	0	0	0	0	0	0	0
Pseudo-nitzschia granii	0.986842	KU183494	Pseudo-nitzschia	Bacillariaceae	Bacillariales	Bacillariophyceae	species	['Pseudo-nitzschia granii']	Pseudo-nitzschia granii	476440	aaacgttacagctgcaactatggaagaagttctaaaacgttgtgagtatgctaaatcagtaggttctatcgttgtt	89	0	0	0	0	0	0	0	0	0	0	0	0	0	0	0	0	0	0	0	0	0	0	0	0	60	0	29	0	0	0	0	0	0	0	0	0	0
Pseudo-nitzschia granii	0.986842	KU183494	Pseudo-nitzschia	Bacillariaceae	Bacillariales	Bacillariophyceae	species	['Pseudo-nitzschia granii']	Pseudo-nitzschia granii	476440	aaacgttacagctgcaactatggaagaagttctaaaacattgtgagtatgctaaatcagtaggttctatcgttgta	73	0	0	0	59	0	0	0	0	0	0	0	0	0	0	0	0	0	0	0	0	0	0	0	0	0	0	14	0	0	0	0	0	0	0	0	0	0
Pseudo-nitzschia granii	0.986842	KU183494	Pseudo-nitzschia	Bacillariaceae	Bacillariales	Bacillariophyceae	species	['Pseudo-nitzschia granii']	Pseudo-nitzschia granii	476440	aaacgttacagctgcaactatggaagaagttctaagacgttgtgagtatgctaaatcagtaggttctatcgttgta	67	0	0	0	0	0	0	0	0	0	0	0	0	0	0	0	0	0	0	0	0	0	0	0	0	13	12	42	0	0	0	0	0	0	0	0	0	0
Pseudo-nitzschia granii	0.986842	KU183494	Pseudo-nitzschia	Bacillariaceae	Bacillariales	Bacillariophyceae	species	['Pseudo-nitzschia granii']	Pseudo-nitzschia granii	476440	aaacgttacagctgcaactatggaagaagttctaaaacgtcgtgagtatgctaaatcagtaggttctatcgttgta	60	0	0	0	0	0	0	0	0	0	0	0	0	0	0	0	0	0	0	0	0	0	0	0	0	0	12	48	0	0	0	0	0	0	0	0	0	0
Pseudo-nitzschia granii	0.986842	KU183494	Pseudo-nitzschia	Bacillariaceae	Bacillariales	Bacillariophyceae	species	['Pseudo-nitzschia granii']	Pseudo-nitzschia granii	476440	agacgttacagctgcaactatggaagaagttctaaaacgttgtgagtatgctaaatcagtaggttctatcgttgta	39	0	0	0	0	0	0	0	0	0	0	0	0	0	0	0	0	0	0	0	22	0	0	0	0	0	0	17	0	0	0	0	0	0	0	0	0	0
Pseudo-nitzschia granii	0.986842	KU183494	Pseudo-nitzschia	Bacillariaceae	Bacillariales	Bacillariophyceae	species	['Pseudo-nitzschia granii']	Pseudo-nitzschia granii	476440	aaacgttacagctgcaactatggaagaagttctaaaacgttgtgagtatgctaaatcagtaggttctatagttgta	25	0	0	0	0	0	0	0	0	0	0	0	0	0	0	0	0	0	0	0	0	0	0	0	0	0	0	25	0	0	0	0	0	0	0	0	0	0
Pseudo-nitzschia granii	0.986842	KU183494	Pseudo-nitzschia	Bacillariaceae	Bacillariales	Bacillariophyceae	species	['Pseudo-nitzschia granii']	Pseudo-nitzschia granii	476440	aaacgttacagctgcaactatggatgaagttctaaaacgttgtgagtatgctaaatcagtaggttctatcgttgta	19	0	0	0	0	0	0	0	0	0	0	0	0	0	0	0	0	0	0	0	0	0	0	0	0	0	0	19	0	0	0	0	0	0	0	0	0	0
Pseudo-nitzschia granii	0.986842	KU183494	Pseudo-nitzschia	Bacillariaceae	Bacillariales	Bacillariophyceae	species	['Pseudo-nitzschia granii']	Pseudo-nitzschia granii	476440	aaacgttacagctgcaactatggaagaatttctaaaacgttgtgagtatgctaaatcagtaggttctatcgttgta	11	0	0	0	0	0	0	0	0	0	0	0	0	0	0	0	0	0	0	0	0	0	0	0	0	0	0	11	0	0	0	0	0	0	0	0	0	0
Pylaiella	1	AB899288	Pylaiella	Acinetosporaceae	Ectocarpales	Phaeophyceae	genus	[]	NA	2882	aaatattacagctgcaactatggagcaaatgtatgaacgtgcagaatatgctcattcaattggttcagttattgtt	66	0	0	0	0	0	0	0	0	0	0	66	0	0	0	0	0	0	0	0	0	0	0	0	0	0	0	0	0	0	0	0	0	0	0	0	0	0
Rhizosolenia shrubsolei	1	FJ002128	Rhizosolenia	Rhizosoleniaceae	Rhizosoleniales	Coscinodiscophyceae	species	['Rhizosolenia shrubsolei']	Rhizosolenia shrubsolei	555720	aaacatgactgcagcaacaatggatgaatgcatcaagcgtggtgaatacgctaaagctgttggttctgtaattgtt	73	0	0	0	0	0	0	0	0	0	0	0	0	0	0	0	62	11	0	0	0	0	0	0	0	0	0	0	0	0	0	0	0	0	0	0	0	0
Rhizosolenia shrubsolei	0.986842	FJ002128	Rhizosolenia	Rhizosoleniaceae	Rhizosoleniales	Coscinodiscophyceae	species	['Rhizosolenia shrubsolei']	Rhizosolenia shrubsolei	555720	aaacatgactgcagcaacaatggatgaatgcatcaagcgtggtgaatacgctaaagctgttagttctgtaattgtt	15	0	0	0	0	0	0	0	0	0	0	0	0	0	0	0	0	0	0	15	0	0	0	0	0	0	0	0	0	0	0	0	0	0	0	0	0	0
Shionodiscus ritscheri	0.947368	DQ514813	Shionodiscus	Thalassiosiraceae	Thalassiosirales	Mediophyceae	species	['Shionodiscus ritscheri']	Shionodiscus ritscheri	443638	aaacgttacagctagtacgatggaagaagtatacaaacgtgctgagtatgctaaagctatcgattctatcgttatt	1248	0	0	0	0	0	0	0	0	0	0	0	0	1248	0	0	0	0	0	0	0	0	0	0	0	0	0	0	0	0	0	0	0	0	0	0	0	0
Shionodiscus ritscheri	0.960526	DQ514813	Shionodiscus	Thalassiosiraceae	Thalassiosirales	Mediophyceae	species	['Shionodiscus ritscheri']	Shionodiscus ritscheri	443638	aaacgttacagctagtacgatggaagaagtatacaaacgtgctgagtatgctaaagctatcggttctatcgttatt	487	17	18	0	30	0	0	0	49	0	0	44	10	0	0	33	0	0	0	0	16	0	88	0	0	0	133	0	0	0	0	49	0	0	0	0	0	0
Shionodiscus ritscheri	0.947368	DQ514813	Shionodiscus	Thalassiosiraceae	Thalassiosirales	Mediophyceae	species	['Shionodiscus ritscheri']	Shionodiscus ritscheri	443638	aaacgttatagctagtacgatggaagaagtatacaaacgtgctgagtatgctaaagctatcggttctatcgttatt	215	0	0	0	215	0	0	0	0	0	0	0	0	0	0	0	0	0	0	0	0	0	0	0	0	0	0	0	0	0	0	0	0	0	0	0	0	0
Shionodiscus ritscheri	0.947368	DQ514813	Shionodiscus	Thalassiosiraceae	Thalassiosirales	Mediophyceae	species	['Shionodiscus ritscheri']	Shionodiscus ritscheri	443638	gaacgttacagctaacactatggaagaagtgtacaaacgtgctgagtatgctaaagcaatcggttctattgttatt	120	0	0	0	0	0	16	0	0	0	0	0	0	0	0	0	0	0	0	0	0	104	0	0	0	0	0	0	0	0	0	0	0	0	0	0	0	0
Shionodiscus ritscheri	0.907895	DQ514813	Shionodiscus	Thalassiosiraceae	Thalassiosirales	Mediophyceae	species	['Shionodiscus ritscheri']	Shionodiscus ritscheri	443638	gaatgttacagcaaatacgatggaagaagtatacaagcgtgctgagtatgctaaagctattggctctattgttatt	14	14	0	0	0	0	0	0	0	0	0	0	0	0	0	0	0	0	0	0	0	0	0	0	0	0	0	0	0	0	0	0	0	0	0	0	0	0
Skeletonema	0.986842	DQ514817	Skeletonema	Skeletonemataceae	Thalassiosirales	Mediophyceae	genus	['Skeletonema sp.', 'Skeletonema costatum']	NA	2842	aaacattacagctgcgacaatggaagaagtatacaaacgtgctgagtatgctaaagctgttggttctatcgttgtt	144499	42	163	20	720	119	202	1288	2228	2102	152	1952	130	3439	0	1920	1074	1474	1971	869	3768	0	200	32	4919	12448	17490	40380	4581	20610	2383	1373	1180	3915	10	10159	0	1186
Skeletonema	0.922078	DQ514817	Skeletonema	Skeletonemataceae	Thalassiosirales	Mediophyceae	genus	['Skeletonema sp.', 'Skeletonema pseudocostatum', 'Skeletonema costatum']	NA	2842	aaacgttacagctgcgactatggaagaagtatacaaacgttgtgagtatgctaaatctgttggttctatcgttgtt	3209	0	0	0	123	0	0	0	0	0	0	0	0	0	0	0	0	0	0	0	585	0	0	0	0	78	344	0	0	196	22	0	0	44	1817	0	0	0
Skeletonema	0.973684	DQ514817	Skeletonema	Skeletonemataceae	Thalassiosirales	Mediophyceae	genus	['Skeletonema sp.', 'Skeletonema pseudocostatum', 'Skeletonema costatum']	NA	2842	aaacattacagctgcgacaatggaagaagtatacaaacgtgctgagtatgctaaagctgttggttctatcgtcgtt	1192	0	0	0	0	0	0	0	0	0	0	19	0	0	0	0	0	0	0	0	0	0	0	0	18	0	19	38	1078	20	0	0	0	0	0	0	0	0
Skeletonema	0.973684	DQ514817	Skeletonema	Skeletonemataceae	Thalassiosirales	Mediophyceae	genus	['Skeletonema sp.', 'Skeletonema pseudocostatum', 'Skeletonema costatum']	NA	2842	aaacattacagctgcgacaatggaagaagtatacagacgtgctgagtatgctaaagctgttggttctatcgttgtt	1031	0	0	0	0	0	0	0	0	0	0	0	0	0	0	0	0	0	0	0	0	0	0	0	14	24	25	164	0	24	0	770	0	0	0	10	0	0
Skeletonema	0.973684	DQ514817	Skeletonema	Skeletonemataceae	Thalassiosirales	Mediophyceae	genus	['Skeletonema sp.', 'Skeletonema pseudocostatum', 'Skeletonema costatum']	NA	2842	aaacattacagctgcgacaatggaagaagtatacaaacgtgctgaatatgctaaagctgttggttctatcgttgtt	691	0	0	0	248	0	0	0	0	0	0	424	0	0	0	0	0	0	0	0	0	0	0	0	0	0	0	19	0	0	0	0	0	0	0	0	0	0
Skeletonema	0.973684	DQ514817	Skeletonema	Skeletonemataceae	Thalassiosirales	Mediophyceae	genus	['Skeletonema sp.', 'Skeletonema pseudocostatum', 'Skeletonema costatum']	NA	2842	aaacattacagctgcgacaatggaagaggtatacaaacgtgctgagtatgctaaagctgttggttctatcgttgtt	440	0	0	0	0	0	0	0	0	0	0	0	0	0	0	0	0	0	0	0	256	0	0	0	0	33	29	65	21	26	0	0	0	0	0	10	0	0
Skeletonema	0.973684	DQ514817	Skeletonema	Skeletonemataceae	Thalassiosirales	Mediophyceae	genus	['Skeletonema sp.', 'Skeletonema pseudocostatum', 'Skeletonema costatum']	NA	2842	aaacattacagctgcgacaatggaagaagtatacaaacgtgctgagtatgctaaagctgttggttctattgttgtt	339	0	0	0	0	0	0	0	0	0	0	0	0	0	0	0	0	0	0	0	0	0	0	0	0	0	0	327	0	12	0	0	0	0	0	0	0	0
Skeletonema	0.973684	DQ514817	Skeletonema	Skeletonemataceae	Thalassiosirales	Mediophyceae	genus	['Skeletonema sp.', 'Skeletonema pseudocostatum', 'Skeletonema costatum']	NA	2842	aaacattacagctgcgacaatggaaaaagtatacaaacgtgctgagtatgctaaagctgttggttctatcgttgtt	325	0	0	0	0	0	0	0	0	0	0	0	0	0	0	0	0	0	0	0	0	0	0	0	325	0	0	0	0	0	0	0	0	0	0	0	0	0
Skeletonema	0.973684	DQ514817	Skeletonema	Skeletonemataceae	Thalassiosirales	Mediophyceae	genus	['Skeletonema sp.', 'Skeletonema pseudocostatum', 'Skeletonema costatum']	NA	2842	aaacattacagctgcgacaatggaagaagtatacaaacgtgctgagtatgctaaagctgttggctctatcgttgtt	238	0	0	0	0	0	0	0	14	0	0	0	0	16	0	0	0	0	0	0	0	0	0	0	0	19	52	67	0	31	0	0	0	25	0	14	0	0
Skeletonema	0.973684	DQ514817	Skeletonema	Skeletonemataceae	Thalassiosirales	Mediophyceae	genus	['Skeletonema sp.', 'Skeletonema pseudocostatum', 'Skeletonema costatum']	NA	2842	aaacattacagccgcgacaatggaagaagtatacaaacgtgctgagtatgctaaagctgttggttctatcgttgtt	200	0	0	0	0	0	0	0	12	0	0	0	0	0	0	0	0	0	0	0	13	0	0	0	11	25	29	55	10	31	0	0	0	0	0	14	0	0
Skeletonema	0.973684	DQ514817	Skeletonema	Skeletonemataceae	Thalassiosirales	Mediophyceae	genus	['Skeletonema sp.', 'Skeletonema pseudocostatum', 'Skeletonema costatum']	NA	2842	aaacattacagctgcgacaatgaaagaagtatacaaacgtgctgagtatgctaaagctgttggttctatcgttgtt	122	0	62	0	0	0	0	0	39	0	0	0	0	0	0	0	0	0	0	0	0	0	0	0	0	0	0	11	0	10	0	0	0	0	0	0	0	0
Skeletonema	0.973684	DQ514817	Skeletonema	Skeletonemataceae	Thalassiosirales	Mediophyceae	genus	['Skeletonema sp.', 'Skeletonema costatum']	NA	2842	aaacgtaacagctgcaacaatggaagaagtatacaaacgtgctgagtatgctaaagctgttggttctatcgttgtt	53	0	0	0	0	0	0	0	0	0	0	0	0	0	0	0	0	0	0	0	0	0	0	0	0	53	0	0	0	0	0	0	0	0	0	0	0	0
Skeletonema	0.973684	DQ514817	Skeletonema	Skeletonemataceae	Thalassiosirales	Mediophyceae	genus	['Skeletonema sp.', 'Skeletonema pseudocostatum', 'Skeletonema costatum']	NA	2842	aaacattacagctgcgacaatggaagaagtatacaaacgtgctgagtatgctaaagctgttggttctatcgttatt	47	0	0	0	0	0	0	0	0	0	0	0	0	0	0	0	0	0	0	0	0	0	0	0	0	10	0	27	0	10	0	0	0	0	0	0	0	0
Skeletonema	0.973684	DQ514817	Skeletonema	Skeletonemataceae	Thalassiosirales	Mediophyceae	genus	['Skeletonema sp.', 'Skeletonema pseudocostatum', 'Skeletonema costatum']	NA	2842	aaacattacagctgcgacaatggaagaagtatacaaacgtgctgagtatgctaaagctgttggttctatcgttgta	43	0	0	0	0	0	0	0	0	0	0	0	0	0	0	0	0	0	0	0	0	0	0	0	0	43	0	0	0	0	0	0	0	0	0	0	0	0
Skeletonema	0.960526	DQ514817	Skeletonema	Skeletonemataceae	Thalassiosirales	Mediophyceae	genus	['Skeletonema sp.', 'Skeletonema pseudocostatum', 'Skeletonema costatum']	NA	2842	aaacgttacagctgccactatggaagaagtatacaaacgtgctgagtatgctaaagctgttggttctatcgttgtt	33	0	0	0	0	0	0	0	0	0	0	0	0	12	0	0	0	0	0	0	0	0	0	0	0	21	0	0	0	0	0	0	0	0	0	0	0	0
Skeletonema	0.973684	DQ514817	Skeletonema	Skeletonemataceae	Thalassiosirales	Mediophyceae	genus	['Skeletonema sp.', 'Skeletonema pseudocostatum', 'Skeletonema costatum']	NA	2842	aaacattacagctgcgataatggaagaagtatacaaacgtgctgagtatgctaaagctgttggttctatcgttgtt	32	0	0	0	0	0	0	0	0	0	0	0	0	0	0	0	0	0	0	0	19	0	0	0	0	0	0	0	0	13	0	0	0	0	0	0	0	0
Skeletonema	0.986842	JN159931	Skeletonema	Skeletonemataceae	Thalassiosirales	Mediophyceae	genus	['Skeletonema costatum']	NA	2842	aaacattacagctgctactatggaagaagtatacaaacgtgctgagtatgctaaagctgttggttctatcgttgtt	31	0	0	0	0	0	0	0	0	0	0	0	0	0	0	0	0	0	0	0	0	0	0	0	0	31	0	0	0	0	0	0	0	0	0	0	0	0
Skeletonema	1	DQ514817	Skeletonema	Skeletonemataceae	Thalassiosirales	Mediophyceae	genus	[]	NA	2842	aaacattacagctgcaacaatggaagaagtatacaaacgtgctgagtatgctaaagctgttggttctatcgttgtt	30	0	0	0	0	0	0	0	0	0	0	0	0	0	0	0	0	0	0	0	0	0	0	0	0	0	0	30	0	0	0	0	0	0	0	0	0	0
Skeletonema	0.973684	DQ514817	Skeletonema	Skeletonemataceae	Thalassiosirales	Mediophyceae	genus	['Skeletonema sp.', 'Skeletonema pseudocostatum', 'Skeletonema costatum']	NA	2842	aaacattacagctgcgactatggaagaagtatacaaacgtgctgagtatgctaaagctgttggttctatcgttgtt	21	0	0	0	0	0	0	0	0	0	0	0	0	0	0	0	0	0	0	0	0	0	0	0	0	0	10	11	0	0	0	0	0	0	0	0	0	0
Skeletonema	0.973684	DQ514817	Skeletonema	Skeletonemataceae	Thalassiosirales	Mediophyceae	genus	['Skeletonema sp.', 'Skeletonema pseudocostatum', 'Skeletonema costatum']	NA	2842	aaacattacagctgcgacaatggaagaagtatacaaacgtgctaagtatgctaaagctgttggttctatcgttgtt	18	0	0	0	0	0	0	0	0	0	0	0	0	0	0	0	0	0	0	0	0	0	0	0	0	0	0	18	0	0	0	0	0	0	0	0	0	0
Skeletonema	0.960526	DQ514817	Skeletonema	Skeletonemataceae	Thalassiosirales	Mediophyceae	genus	['Skeletonema sp.', 'Skeletonema pseudocostatum', 'Skeletonema costatum']	NA	2842	aaacgtaacagctgcaacaatggaagaagtgtacaaacgtgctgagtatgctaaagctgttggttctatcgttgtt	16	0	0	0	0	0	0	0	0	0	0	0	0	0	0	0	0	0	0	0	0	0	0	0	0	16	0	0	0	0	0	0	0	0	0	0	0	0
Skeletonema	0.960526	DQ514817	Skeletonema	Skeletonemataceae	Thalassiosirales	Mediophyceae	genus	['Skeletonema sp.', 'Skeletonema pseudocostatum', 'Skeletonema costatum']	NA	2842	aaacgtaacagctgcgacaatggaagaagtatacaaacgtgctgagtatgctaaagctgttggttctatcgttgtt	13	0	0	0	0	0	0	0	0	0	0	0	0	0	0	0	0	0	0	0	0	0	0	0	0	13	0	0	0	0	0	0	0	0	0	0	0	0
Skeletonema	0.973684	DQ514817	Skeletonema	Skeletonemataceae	Thalassiosirales	Mediophyceae	genus	['Skeletonema sp.', 'Skeletonema pseudocostatum', 'Skeletonema costatum']	NA	2842	aaacattacagctgcgacaatggaagaagtatacaaatgtgctgagtatgctaaagctgttggttctatcgttgtt	12	0	0	0	0	0	0	0	0	0	0	0	0	0	0	0	0	0	0	0	0	0	0	0	0	0	0	0	0	12	0	0	0	0	0	0	0	0
Skeletonema costatum	0.986842	AF015569	Skeletonema	Skeletonemataceae	Thalassiosirales	Mediophyceae	species	['Skeletonema costatum']	Skeletonema costatum	2843	aaacattactgctgcgacaatggaagaagtatacaaacgtgctgagtatgctaaagctgttggttctatcgttgtt	496	0	0	0	0	0	0	0	10	0	0	30	0	37	0	27	71	50	15	21	0	0	0	0	11	163	0	14	0	10	0	12	0	0	0	25	0	0
Skeletonema subsalsum	0.960526	DQ514820	Skeletonema	Skeletonemataceae	Thalassiosirales	Mediophyceae	species	['Skeletonema subsalsum']	Skeletonema subsalsum	216763	aaacattacagctgcgacaatggaagaaacatacaaacgtgctgagtatgctaaagctattggttctatcgttgtt	79371	1066	766	2441	6109	1036	873	723	1328	2703	500	3214	1813	691	2982	52	472	3345	6249	5801	14421	5467	4125	267	1153	571	0	11004	0	0	199	0	0	0	0	0	0	0
Skeletonema subsalsum	0.947368	DQ514820	Skeletonema	Skeletonemataceae	Thalassiosirales	Mediophyceae	species	['Skeletonema subsalsum']	Skeletonema subsalsum	216763	aaacattatagctgcgacaatggaagaaacatacaaacgtgctgagtatgctaaagctattggttctatcgttgtt	716	0	0	0	0	0	0	0	0	0	0	0	0	0	0	0	41	0	0	0	0	0	0	0	675	0	0	0	0	0	0	0	0	0	0	0	0	0
Skeletonema subsalsum	0.947368	DQ514820	Skeletonema	Skeletonemataceae	Thalassiosirales	Mediophyceae	species	['Skeletonema subsalsum']	Skeletonema subsalsum	216763	aaacattacagctgcgacaatggaagaaacatacaaacatgctgagtatgctaaagctattggttctatcgttgtt	447	0	0	0	0	0	0	0	0	0	0	0	0	0	0	0	0	0	447	0	0	0	0	0	0	0	0	0	0	0	0	0	0	0	0	0	0	0
Skeletonema subsalsum	0.986842	DQ514820	Skeletonema	Skeletonemataceae	Thalassiosirales	Mediophyceae	species	['Skeletonema subsalsum']	Skeletonema subsalsum	216763	aaacgttacagctgctacaatggaagaaacatacaaacgtgctgagtatgctaaagctattggttctatcgttgtt	352	0	0	24	0	0	0	10	10	22	0	19	70	13	18	0	0	0	0	73	0	93	0	0	0	0	0	0	0	0	0	0	0	0	0	0	0	0
Skeletonema subsalsum	0.947368	DQ514820	Skeletonema	Skeletonemataceae	Thalassiosirales	Mediophyceae	species	['Skeletonema subsalsum']	Skeletonema subsalsum	216763	aaacattacagctgcgacaatggaaaaaacatacaaacgtgctgagtatgctaaagctattggttctatcgttgtt	229	0	0	0	0	0	0	0	0	0	0	229	0	0	0	0	0	0	0	0	0	0	0	0	0	0	0	0	0	0	0	0	0	0	0	0	0	0
Skeletonema subsalsum	0.947368	DQ514820	Skeletonema	Skeletonemataceae	Thalassiosirales	Mediophyceae	species	['Skeletonema subsalsum']	Skeletonema subsalsum	216763	aaacattacagctgcgacaatggaagaaacatacaaatgtgctgagtatgctaaagctattggttctatcgttgtt	183	0	0	0	0	0	0	0	0	0	0	183	0	0	0	0	0	0	0	0	0	0	0	0	0	0	0	0	0	0	0	0	0	0	0	0	0	0
Skeletonema subsalsum	0.973684	DQ514820	Skeletonema	Skeletonemataceae	Thalassiosirales	Mediophyceae	species	['Skeletonema subsalsum']	Skeletonema subsalsum	216763	aaacgttacagctgcgacaatggaagaaacatacaaacgtgctgagtatgctaaagctattggttctatcgttgtt	155	0	0	0	12	0	0	0	0	12	0	13	36	0	14	0	0	0	0	31	0	37	0	0	0	0	0	0	0	0	0	0	0	0	0	0	0	0
Skeletonema subsalsum	0.947368	DQ514820	Skeletonema	Skeletonemataceae	Thalassiosirales	Mediophyceae	species	['Skeletonema subsalsum']	Skeletonema subsalsum	216763	aaatattacagctgcgacaatggaagaaacatacaaacgtgctgagtatgctaaagctattggttctatcgttgtt	71	0	0	0	0	0	71	0	0	0	0	0	0	0	0	0	0	0	0	0	0	0	0	0	0	0	0	0	0	0	0	0	0	0	0	0	0	0
Skeletonema subsalsum	0.935065	DQ514820	Skeletonema	Skeletonemataceae	Thalassiosirales	Mediophyceae	species	['Skeletonema subsalsum']	Skeletonema subsalsum	216763	aaacgttacagctgctacaatggaagaaacatacaagcgtgctgagtatgctaaaactttaggttctatcgttatc	46	0	0	0	0	0	0	0	0	0	0	20	14	12	0	0	0	0	0	0	0	0	0	0	0	0	0	0	0	0	0	0	0	0	0	0	0	0
Skeletonema subsalsum	0.947368	DQ514820	Skeletonema	Skeletonemataceae	Thalassiosirales	Mediophyceae	species	['Skeletonema subsalsum']	Skeletonema subsalsum	216763	aaacattacagctgcgacaatgaaagaaacatacaaacgtgctgagtatgctaaagctattggttctatcgttgtt	41	0	41	0	0	0	0	0	0	0	0	0	0	0	0	0	0	0	0	0	0	0	0	0	0	0	0	0	0	0	0	0	0	0	0	0	0	0
Skeletonema subsalsum	0.973684	DQ514820	Skeletonema	Skeletonemataceae	Thalassiosirales	Mediophyceae	species	['Skeletonema subsalsum']	Skeletonema subsalsum	216763	aaacgttacagctgctacaatggaagaaacatacaagcgtgctgagtatgctaaagctgttggttctatcgttatt	33	0	0	0	0	0	0	0	0	0	0	10	11	12	0	0	0	0	0	0	0	0	0	0	0	0	0	0	0	0	0	0	0	0	0	0	0	0
Skeletonema subsalsum	0.960526	DQ514820	Skeletonema	Skeletonemataceae	Thalassiosirales	Mediophyceae	species	['Skeletonema subsalsum']	Skeletonema subsalsum	216763	aaacgttacagctgctacaatggaagaaacatacaagcgtgctgaatatgctaaagctgttggttctatcgttatt	31	0	0	0	0	0	0	0	0	0	0	0	10	21	0	0	0	0	0	0	0	0	0	0	0	0	0	0	0	0	0	0	0	0	0	0	0	0
Skeletonema subsalsum	0.947368	DQ514820	Skeletonema	Skeletonemataceae	Thalassiosirales	Mediophyceae	species	['Skeletonema subsalsum']	Skeletonema subsalsum	216763	aaacattacagctgcgacagtggaagaaacatacaaacgtgctgagtatgctaaagctattggttctatcgttgtt	29	0	0	0	0	0	0	0	0	0	0	0	0	0	0	0	0	0	0	0	10	0	0	0	0	0	0	19	0	0	0	0	0	0	0	0	0	0
Skeletonema subsalsum	0.948052	DQ514820	Skeletonema	Skeletonemataceae	Thalassiosirales	Mediophyceae	species	['Skeletonema subsalsum']	Skeletonema subsalsum	216763	aaacgttacagctgctacaatggaagaaacatacaaacgtgctgagtatgctaaaactttaggttctatcgttatc	16	0	0	0	0	0	0	0	0	0	0	0	16	0	0	0	0	0	0	0	0	0	0	0	0	0	0	0	0	0	0	0	0	0	0	0	0	0
Skeletonema subsalsum	0.947368	DQ514820	Skeletonema	Skeletonemataceae	Thalassiosirales	Mediophyceae	species	['Skeletonema subsalsum']	Skeletonema subsalsum	216763	aaacattacagctgcgacaatggaagaaacatacaaacgtgctaagtatgctaaagctattggttctatcgttgtt	14	0	0	0	0	0	0	0	0	14	0	0	0	0	0	0	0	0	0	0	0	0	0	0	0	0	0	0	0	0	0	0	0	0	0	0	0	0
Skeletonema subsalsum	0.947368	DQ514820	Skeletonema	Skeletonemataceae	Thalassiosirales	Mediophyceae	species	['Skeletonema subsalsum']	Skeletonema subsalsum	216763	aaacattacatctgcgacaatggaagaaacatacaaacgtgctgagtatgctaaagctattggttctatcgttgtt	12	0	0	0	0	0	0	0	0	0	0	0	0	0	0	0	0	0	0	0	12	0	0	0	0	0	0	0	0	0	0	0	0	0	0	0	0	0
sp.hacelaria radicans	0.960526	FM956112	Sphacelaria	Sphacelariaceae	Sphacelariales	Phaeophyceae	species	['Sphacelaria radicans']	Sphacelaria radicans	117509	taatgtaactgctgctacaatggaacaaatatatgaacgtgcagaatttgctgactcagttggtacagttattgta	220	0	0	0	0	0	0	0	0	0	0	0	0	0	0	0	0	0	0	0	0	0	0	0	0	0	0	220	0	0	0	0	0	0	0	0	0	0
Strombidium sp. HZ-2009b	1	AY257111	Strombidium	Strombidiidae	Oligotrichida	Ciliatea	species	['Strombidium sp. HZ-2009b']	Strombidium sp. HZ-2009b	693433	aaacatcacagcagctactatggaagaagtttacaagcgtgctgagtatgctaaagctgtaggttctgtaattgtt	21159	0	0	0	0	0	0	0	0	0	0	0	0	0	0	0	0	0	0	0	0	0	0	0	0	0	0	11079	10080	0	0	0	0	0	0	0	0	0
Strombidium sp. HZ-2009b	0.986842	AY257111	Strombidium	Strombidiidae	Oligotrichida	Ciliatea	species	['Strombidium sp. HZ-2009b']	Strombidium sp. HZ-2009b	693433	aaacatcacagcagcaactatggaagaagtttacaagcgtgctgagtatgctaaagctgtaggttctgtaattgtt	3995	0	0	0	0	0	0	0	0	0	0	0	0	0	0	0	0	0	0	0	0	0	0	0	0	0	0	0	0	0	0	0	0	0	0	3995	0	0
Strombidium sp. HZ-2009b	0.986842	AY257111	Strombidium	Strombidiidae	Oligotrichida	Ciliatea	species	['Strombidium sp. HZ-2009b']	Strombidium sp. HZ-2009b	693433	aaacatcacagcagctacaatggaagaagtttacaagcgtgctgagtatgctaaagctgtaggttctgtaattgtt	878	0	0	0	0	0	0	0	0	0	0	0	160	0	0	0	0	718	0	0	0	0	0	0	0	0	0	0	0	0	0	0	0	0	0	0	0	0
Strombidium sp. HZ-2009b	0.986842	AY257111	Strombidium	Strombidiidae	Oligotrichida	Ciliatea	species	['Strombidium sp. HZ-2009b']	Strombidium sp. HZ-2009b	693433	aaacatcacagcagctactatggaagaagtttacaagcgtgctgagtatgctaaaactgtaggttctgtaattgtt	378	0	0	0	378	0	0	0	0	0	0	0	0	0	0	0	0	0	0	0	0	0	0	0	0	0	0	0	0	0	0	0	0	0	0	0	0	0
Synedra	1	HQ912485	Synedra	Fragilariaceae	Fragilariales	Bacillariophyceae	genus	[]	NA	191584	aaacgttacagctgcaactatggaagaagtatacaaacgtgctgagtatgctaaagctgtaggttctgtaatcatc	1720	0	0	0	0	0	0	0	0	169	0	0	0	0	1521	30	0	0	0	0	0	0	0	0	0	0	0	0	0	0	0	0	0	0	0	0	0	0
Thalassiosira	0.986842	DQ514808	Thalassiosira	Thalassiosiraceae	Thalassiosirales	Mediophyceae	genus	['Thalassiosira sp. 1 SEH-2013']	NA	35127	aaacattactgctgcgacaatggaagaagtatacaaacgtgctgagtatgctaaagctattggttctgtagttgtt	1231653	5380	7002	13909	32663	6477	6027	1181	4108	4387	3258	23298	12323	5753	4910	5988	42407	51068	140530	16309	66286	15464	41065	3972	21308	13147	15855	6696	18032	15036	14217	32178	37859	38236	36894	189839	135006	143585
Thalassiosira	1	DQ514808	Thalassiosira	Thalassiosiraceae	Thalassiosirales	Mediophyceae	genus	[]	NA	35127	aaacattacagctgcgacaatggaagaagtatacaaacgtgctgagtatgctaaagctattggttctgtagttgtt	365180	5421	6244	20575	30064	5505	6964	804	314	1850	344	48	1813	1010	6496	2166	7521	14356	49668	10929	35623	8512	21831	1048	29729	9258	0	3993	22749	16884	0	43048	160	16	29	93	56	59
Thalassiosira	0.973684	DQ514808	Thalassiosira	Thalassiosiraceae	Thalassiosirales	Mediophyceae	genus	['Thalassiosira sp. 11BOF', 'Thalassiosira sp. 1 SEH-2013']	NA	35127	aaacattactgctgcgacgatggaagaagtatacaaacgtgctgagtatgctaaagctattggttctgtagttgtt	93091	4407	3863	6443	13767	2922	4182	768	668	176	21	4108	657	2478	99	501	147	1511	51	730	5642	1216	53	0	15050	9863	984	823	11204	422	11	23	30	13	27	92	69	70
Thalassiosira	0.973684	DQ514808	Thalassiosira	Thalassiosiraceae	Thalassiosirales	Mediophyceae	genus	['Thalassiosira sp. 11BOF', 'Thalassiosira sp. 1 SEH-2013']	NA	35127	aaacattactgctgcgacaatggaagaagtatacaaacgtgctgagtatgctaaagctactggttctgtagttgtt	8569	0	11	67	56	0	0	0	0	0	0	286	10	0	0	0	39	42	137	17	58	17	123	0	37	22	19	0	10	18	0	27	58	26	61	123	7144	161
Thalassiosira	0.960526	KC284709	Thalassiosira	Thalassiosiraceae	Thalassiosirales	Mediophyceae	genus	['Thalassiosira minima']	NA	35127	aaacatcacagctgctactatggaagaagtgtacaaacgtgctgagtacgctaaagcaatcggttctgtaattgtc	4891	0	0	0	0	0	0	0	0	0	0	0	0	0	0	0	0	0	0	0	0	0	0	0	0	0	0	0	0	4891	0	0	0	0	0	0	0	0
Thalassiosira	0.973684	DQ514808	Thalassiosira	Thalassiosiraceae	Thalassiosirales	Mediophyceae	genus	['Thalassiosira sp. 11BOF', 'Thalassiosira sp. 1 SEH-2013']	NA	35127	aaacattactgctgcgacaatggaagaagtatacaaacgtgctgagtatgctaaagttattggttctgtagttgtt	4889	41	0	21	344	0	0	0	0	0	0	11	0	0	0	0	13	15	46	0	27	0	0	0	0	0	0	4198	0	0	0	17	0	21	18	57	37	23
Thalassiosira	0.973684	DQ514808	Thalassiosira	Thalassiosiraceae	Thalassiosirales	Mediophyceae	genus	['Thalassiosira sp. 11BOF', 'Thalassiosira sp. 1 SEH-2013']	NA	35127	aaacattactgctgcgacaatggaagaagtatacaaacgtgctgaatatgctaaagctattggttctgtagttgtt	3444	0	0	981	232	54	0	0	0	0	0	0	0	0	0	0	12	22	37	0	25	0	0	0	0	0	603	0	0	0	0	0	0	1382	0	47	22	27
Thalassiosira	0.973684	DQ514808	Thalassiosira	Thalassiosiraceae	Thalassiosirales	Mediophyceae	genus	['Thalassiosira sp. 11BOF', 'Thalassiosira sp. 1 SEH-2013']	NA	35127	aaacattactgctgcgacaatggaagaagtatacaaacgtgctgagtatgctaaagctattgattctgtagttgtt	3101	11	196	0	87	14	32	0	0	0	0	0	0	0	0	0	14	20	229	0	12	0	18	0	0	0	0	0	0	2257	0	11	26	12	13	59	42	48
Thalassiosira	0.973684	DQ514808	Thalassiosira	Thalassiosiraceae	Thalassiosirales	Mediophyceae	genus	['Thalassiosira sp. 11BOF', 'Thalassiosira sp. 1 SEH-2013']	NA	35127	aaacattactgctgcgacaatgggagaagtatacaaacgtgctgagtatgctaaagctattggttctgtagttgtt	2897	0	15	41	41	10	0	0	278	0	0	46	19	46	10	0	134	83	241	26	121	46	53	10	47	22	29	0	31	40	20	248	103	54	63	675	145	200
Thalassiosira	0.973684	DQ514808	Thalassiosira	Thalassiosiraceae	Thalassiosirales	Mediophyceae	genus	['Thalassiosira sp. 11BOF', 'Thalassiosira sp. 1 SEH-2013']	NA	35127	aaacattactgctgcgacaatggaagaagtatacaaacatgctgagtatgctaaagctattggttctgtagttgtt	2528	0	0	0	17	78	20	0	0	0	0	0	77	0	0	0	24	21	49	13	877	1038	19	0	10	0	12	0	33	0	0	13	13	15	13	70	44	72
Thalassiosira	0.986842	DQ514808	Thalassiosira	Thalassiosiraceae	Thalassiosirales	Mediophyceae	genus	[]	NA	35127	aaatattacagctgcgacaatggaagaagtatacaaacgtgctgagtatgctaaagctattggttctgtagttgtt	2363	0	0	0	10	40	0	0	0	0	0	0	0	0	0	0	0	11	11	0	45	0	0	0	0	0	0	2235	0	0	0	11	0	0	0	0	0	0
Thalassiosira	0.973684	DQ514808	Thalassiosira	Thalassiosiraceae	Thalassiosirales	Mediophyceae	genus	['Thalassiosira sp. 11BOF', 'Thalassiosira sp. 1 SEH-2013']	NA	35127	aaacattactgctgcgacaatggaagaagtatacaaacgtgctaagtatgctaaagctattggttctgtagttgtt	1775	0	23	19	17	0	0	0	0	0	0	16	0	0	0	0	23	56	68	0	31	13	20	0	1252	0	13	0	17	0	0	13	0	26	12	61	42	53
Thalassiosira	0.986842	DQ514808	Thalassiosira	Thalassiosiraceae	Thalassiosirales	Mediophyceae	genus	[]	NA	35127	aaacattacagctgtgacaatggaagaagtatacaaacgtgctgagtatgctaaagctattggttctgtagttgtt	1688	0	0	19	22	0	0	0	0	0	0	0	0	0	0	0	0	0	1411	0	21	0	14	153	13	0	0	0	10	0	0	25	0	0	0	0	0	0
Thalassiosira	0.973684	DQ514808	Thalassiosira	Thalassiosiraceae	Thalassiosirales	Mediophyceae	genus	['Thalassiosira sp. 11BOF', 'Thalassiosira sp. 1 SEH-2013']	NA	35127	aaacattactgctgcgacaatggaagaagtatacaagcgtgctgagtatgctaaagctattggttctgtagttgtt	1587	0	0	17	48	0	16	0	0	0	12	32	16	0	0	0	85	53	187	20	96	30	33	0	22	28	23	10	25	26	19	43	333	35	48	138	89	103
Thalassiosira	0.973684	DQ514808	Thalassiosira	Thalassiosiraceae	Thalassiosirales	Mediophyceae	genus	['Thalassiosira sp. 11BOF', 'Thalassiosira sp. 1 SEH-2013']	NA	35127	aaacattactgctgcgacaatggaagaagtatacaaacgtgctgagtatgctaaagctattggttctgtggttgtt	1486	0	0	16	25	22	0	0	0	0	0	22	0	0	0	11	42	42	642	12	50	17	37	0	19	13	23	0	19	15	10	43	29	31	31	145	89	81
Thalassiosira	0.973684	DQ514808	Thalassiosira	Thalassiosiraceae	Thalassiosirales	Mediophyceae	genus	['Thalassiosira sp. 11BOF', 'Thalassiosira sp. 1 SEH-2013']	NA	35127	aaacattactgctgcgacaatggaagaagtatacaaacgtgctgagtacgctaaagctattggttctgtagttgtt	1430	0	0	16	37	0	0	0	0	0	12	38	19	0	0	0	67	90	140	27	93	22	35	0	40	17	21	0	24	11	14	37	43	28	32	240	217	110
Thalassiosira	0.973684	DQ514808	Thalassiosira	Thalassiosiraceae	Thalassiosirales	Mediophyceae	genus	['Thalassiosira sp. 11BOF', 'Thalassiosira sp. 1 SEH-2013']	NA	35127	aaacattattgctgcgacaatggaagaagtatacaaacgtgctgagtatgctaaagctattggttctgtagttgtt	1264	0	0	12	80	40	113	0	280	0	0	11	0	331	71	0	30	10	86	0	26	0	0	0	0	0	0	0	0	0	0	10	15	0	16	57	30	46
Thalassiosira	0.973684	DQ514808	Thalassiosira	Thalassiosiraceae	Thalassiosirales	Mediophyceae	genus	['Thalassiosira sp. 11BOF', 'Thalassiosira sp. 1 SEH-2013']	NA	35127	aaacgttactgctgcgacaatggaagaagtatacaaacgtgctgagtatgctaaagctattggttctgtagttgtt	1223	10	15	30	45	17	12	0	13	15	17	56	50	14	0	25	59	57	62	30	42	51	16	18	26	15	0	0	10	0	0	20	20	11	19	329	56	63
Thalassiosira	0.973684	DQ514808	Thalassiosira	Thalassiosiraceae	Thalassiosirales	Mediophyceae	genus	['Thalassiosira sp. 11BOF', 'Thalassiosira sp. 1 SEH-2013']	NA	35127	aaacattactgctgcgataatggaagaagtatacaaacgtgctgagtatgctaaagctattggttctgtagttgtt	1086	35	0	0	154	18	0	63	18	0	0	0	465	0	0	0	34	25	88	0	14	0	0	0	0	0	0	0	0	0	0	14	10	0	0	53	40	55
Thalassiosira	0.986842	DQ514808	Thalassiosira	Thalassiosiraceae	Thalassiosirales	Mediophyceae	genus	[]	NA	35127	aaacattacagctgcgacaatggaagaagtatacaaacgtgctaagtatgctaaagctattggttctgtagttgtt	1059	0	194	555	0	0	207	0	0	0	0	0	0	0	0	0	0	0	25	0	20	11	0	0	19	0	0	0	12	0	0	16	0	0	0	0	0	0
Thalassiosira	0.973684	DQ514808	Thalassiosira	Thalassiosiraceae	Thalassiosirales	Mediophyceae	genus	['Thalassiosira sp. 11BOF', 'Thalassiosira sp. 1 SEH-2013']	NA	35127	aaacattacagctgcgacaatggaagaaacatacaaacgtgctgagtatgctaaagctattggttctgtagttgtt	1027	15	20	83	72	43	29	0	0	0	11	37	60	0	22	0	32	133	38	202	0	189	14	0	14	13	0	0	0	0	0	0	0	0	0	0	0	0
Thalassiosira	0.973684	DQ514808	Thalassiosira	Thalassiosiraceae	Thalassiosirales	Mediophyceae	genus	['Thalassiosira sp. 11BOF', 'Thalassiosira sp. 1 SEH-2013']	NA	35127	aaacattactgctgcgacaatggaagaagtatacaaacgtgctgagtatgctaaagctattggttctgcagttgtt	972	0	0	12	32	0	10	0	0	0	0	0	0	0	0	0	41	62	140	11	69	10	36	0	16	14	16	0	0	21	0	29	28	31	30	149	92	123
Thalassiosira	0.973684	DQ514808	Thalassiosira	Thalassiosiraceae	Thalassiosirales	Mediophyceae	genus	['Thalassiosira sp. 11BOF', 'Thalassiosira sp. 1 SEH-2013']	NA	35127	aaatattactgctgcgacaatggaagaagtatacaaacgtgctgagtatgctaaagctattggttctgtagttgtt	869	0	0	0	0	23	0	0	0	0	0	0	23	0	0	0	23	537	47	0	26	0	0	0	10	0	0	0	0	0	0	13	13	11	12	54	37	40
Thalassiosira	0.973684	DQ514808	Thalassiosira	Thalassiosiraceae	Thalassiosirales	Mediophyceae	genus	['Thalassiosira sp. 11BOF', 'Thalassiosira sp. 1 SEH-2013']	NA	35127	aaacattactgctgcgacaatggaagaagtatacaaacgtgctgagtatgctaaagctattggttttgtagttgtt	859	0	0	0	12	13	25	0	377	0	0	20	0	0	0	0	10	0	195	35	27	0	0	47	0	0	0	0	0	0	0	0	10	0	12	38	17	21
Thalassiosira	0.973684	DQ514808	Thalassiosira	Thalassiosiraceae	Thalassiosirales	Mediophyceae	genus	['Thalassiosira sp. 11BOF', 'Thalassiosira sp. 1 SEH-2013']	NA	35127	aaacattactgctgcgacaatggaagaagtatacaaacgtgctgagtatgctaaagctattggttctgtagttatt	781	0	0	0	224	0	0	0	0	0	0	0	11	0	0	0	17	28	285	0	20	0	26	0	10	0	0	0	0	0	0	21	17	0	14	47	30	31
Thalassiosira	0.960526	DQ514808	Thalassiosira	Thalassiosiraceae	Thalassiosirales	Mediophyceae	genus	['Thalassiosira sp. 11BOF', 'Thalassiosira sp. 1 SEH-2013']	NA	35127	aaacattactgctgcgacgatggaagaagtatacaaacgtgctgagtatgctaaagctattggtcctgtagttgtt	769	0	0	385	15	0	12	0	0	0	0	54	0	0	0	0	0	0	0	0	0	0	0	0	24	264	0	0	15	0	0	0	0	0	0	0	0	0
Thalassiosira	0.973684	DQ514808	Thalassiosira	Thalassiosiraceae	Thalassiosirales	Mediophyceae	genus	['Thalassiosira sp. 11BOF', 'Thalassiosira sp. 1 SEH-2013']	NA	35127	aaacattactgctgcgacaatggaagaagtatacaaacgtgctgagcatgctaaagctattggttctgtagttgtt	758	0	0	15	32	0	0	0	0	0	0	15	10	0	0	0	36	28	89	26	52	15	21	0	25	0	11	0	16	11	0	16	26	30	30	105	63	86
Thalassiosira	0.986842	DQ514808	Thalassiosira	Thalassiosiraceae	Thalassiosirales	Mediophyceae	genus	[]	NA	35127	aaacattacagctgcgacaatggaagaagtatataaacgtgctgagtatgctaaagctattggttctgtagttgtt	722	0	0	19	608	0	12	0	0	0	0	0	0	0	0	0	0	0	16	0	17	0	0	0	11	0	0	0	13	0	0	26	0	0	0	0	0	0
Thalassiosira	0.986842	DQ514808	Thalassiosira	Thalassiosiraceae	Thalassiosirales	Mediophyceae	genus	[]	NA	35127	aaacattacagctgcgacaatggaagaagtatacaaacgtgctgagtatgctaaagctattggctctgtagttgtt	703	12	18	43	49	0	22	0	0	0	0	0	0	0	11	0	30	46	65	31	74	15	42	0	95	23	0	0	29	37	0	61	0	0	0	0	0	0
Thalassiosira	0.973684	DQ514808	Thalassiosira	Thalassiosiraceae	Thalassiosirales	Mediophyceae	genus	['Thalassiosira sp. 11BOF', 'Thalassiosira sp. 1 SEH-2013']	NA	35127	aaacattactgctgcgacaatggaagaagtatacaaacgtgctgagtatgctaaagctattggttctatagttgtt	680	0	19	37	51	54	0	0	0	0	0	12	0	15	0	0	25	77	61	14	23	0	24	0	11	54	0	0	0	0	0	10	12	14	14	57	32	64
Thalassiosira	0.986842	DQ514795	Thalassiosira	Thalassiosiraceae	Thalassiosirales	Mediophyceae	genus	['Thalassiosira antarctica', 'Thalassiosira angulata']	NA	35127	aaacattacagctgctactatggaagaagtatacaaacgtgctgagtatgctaaagctattggttctgtagttgtt	636	12	24	29	41	11	20	0	0	14	0	63	23	103	22	25	0	0	0	13	0	17	52	18	0	135	0	14	0	0	0	0	0	0	0	0	0	0
Thalassiosira	0.986842	DQ514808	Thalassiosira	Thalassiosiraceae	Thalassiosirales	Mediophyceae	genus	[]	NA	35127	aaacgttacagctgcgacaatggaagaagtatacaaacgtgctgagtatgctaaagctattggttctgtagttgtt	636	19	19	63	55	19	25	0	0	0	0	12	39	0	21	12	0	27	21	37	21	47	78	0	40	25	0	0	14	0	0	42	0	0	0	0	0	0
Thalassiosira	0.986842	DQ514788	Thalassiosira	Thalassiosiraceae	Thalassiosirales	Mediophyceae	genus	[]	NA	35127	aaacattacaactgctactatggaagaaacatacaaacgtgctgagtatgctaaagccattggttctgtagttgtt	636	0	0	0	0	0	0	0	0	0	0	0	0	0	0	0	0	0	0	0	0	0	0	0	0	636	0	0	0	0	0	0	0	0	0	0	0	0
Thalassiosira	0.986842	DQ514808	Thalassiosira	Thalassiosiraceae	Thalassiosirales	Mediophyceae	genus	[]	NA	35127	aaacattacagctgcgacaatggaagaggtatacaaacgtgctgagtatgctaaagctattggttctgtagttgtt	633	20	20	24	41	11	12	0	0	0	0	0	0	0	0	0	27	25	74	24	58	14	20	0	51	15	0	15	37	46	0	99	0	0	0	0	0	0
Thalassiosira	0.986842	DQ514808	Thalassiosira	Thalassiosiraceae	Thalassiosirales	Mediophyceae	genus	[]	NA	35127	aaacattatagctgcgacaatggaagaagtatacaaacgtgctgagtatgctaaagctattggttctgtagttgtt	625	0	0	50	490	18	0	0	0	0	0	0	0	0	0	0	0	0	15	0	12	0	0	0	12	0	0	0	0	12	0	16	0	0	0	0	0	0
Thalassiosira	0.973684	DQ514808	Thalassiosira	Thalassiosiraceae	Thalassiosirales	Mediophyceae	genus	['Thalassiosira sp. 11BOF', 'Thalassiosira sp. 1 SEH-2013']	NA	35127	aaacattactgctgcgacaatggaagaagtatacaaacgtgctgagtatgctaaagcttttggttctgtagttgtt	593	0	0	11	10	0	0	0	0	0	0	0	0	0	0	0	27	24	74	12	48	12	19	0	11	0	0	0	12	13	0	11	12	22	18	109	66	82
Thalassiosira	0.960526	DQ514808	Thalassiosira	Thalassiosiraceae	Thalassiosirales	Mediophyceae	genus	['Thalassiosira sp. 11BOF', 'Thalassiosira sp. 1 SEH-2013']	NA	35127	aaacattactgctgcgacgatggaagaagtatacaaacgtgctgagtatgctaaagttattggttctgtagttgtt	585	0	0	585	0	0	0	0	0	0	0	0	0	0	0	0	0	0	0	0	0	0	0	0	0	0	0	0	0	0	0	0	0	0	0	0	0	0
Thalassiosira	0.986842	DQ514808	Thalassiosira	Thalassiosiraceae	Thalassiosirales	Mediophyceae	genus	[]	NA	35127	aaacattacagctgcgacaatggaagaagtatacaaacgtgctgagtatgctaaagctattggttctatagttgtt	576	0	199	58	186	0	0	0	0	0	0	0	0	0	0	0	0	0	22	0	16	0	14	0	12	57	0	0	0	0	0	12	0	0	0	0	0	0
Thalassiosira	0.986842	DQ514808	Thalassiosira	Thalassiosiraceae	Thalassiosirales	Mediophyceae	genus	[]	NA	35127	aaacattacagctgcgacaatggaagaagtatacaaacgtgctgagtatgctaaagctattggttttgtagttgtt	574	0	0	0	382	31	0	0	0	0	0	0	0	0	0	0	0	0	103	27	11	0	0	0	10	0	0	0	0	0	0	10	0	0	0	0	0	0
Thalassiosira	0.986842	DQ514808	Thalassiosira	Thalassiosiraceae	Thalassiosirales	Mediophyceae	genus	[]	NA	35127	aaacattacagctgcgacaatggaagaagtatacagacgtgctgagtatgctaaagctattggttctgtagttgtt	532	0	17	22	48	0	28	0	0	0	0	0	0	0	0	0	0	29	61	12	59	17	35	0	69	16	0	0	25	22	0	72	0	0	0	0	0	0
Thalassiosira	0.973684	DQ514808	Thalassiosira	Thalassiosiraceae	Thalassiosirales	Mediophyceae	genus	['Thalassiosira sp. 11BOF', 'Thalassiosira sp. 1 SEH-2013']	NA	35127	aaacattactgctgcgacaatggaagaagtatataaacgtgctgagtatgctaaagctattggttctgtagttgtt	495	0	0	0	153	0	0	0	0	0	0	0	0	0	0	0	20	25	39	0	19	0	14	0	0	0	0	0	10	0	0	13	19	17	18	50	48	50
Thalassiosira	0.973684	DQ514808	Thalassiosira	Thalassiosiraceae	Thalassiosirales	Mediophyceae	genus	['Thalassiosira sp. 11BOF', 'Thalassiosira sp. 1 SEH-2013']	NA	35127	aaacattactgctgcgactatggaagaagtatacaaacgtgctgagtatgctaaagctattggttctgtagttgtt	483	11	0	10	30	0	10	0	0	0	0	18	0	11	0	0	18	10	52	14	25	0	13	0	23	21	0	0	14	0	0	12	19	12	0	54	61	45
Thalassiosira	0.986842	DQ514808	Thalassiosira	Thalassiosiraceae	Thalassiosirales	Mediophyceae	genus	[]	NA	35127	aaacattacagctgcgacaatggaagaagtatacaaacgtgctgagtatgctaaagctattggttctgtagttgct	477	0	10	19	49	0	16	0	0	0	0	0	0	0	0	0	12	19	54	14	55	14	27	0	52	15	0	0	32	17	0	72	0	0	0	0	0	0
Thalassiosira	0.986842	DQ514808	Thalassiosira	Thalassiosiraceae	Thalassiosirales	Mediophyceae	genus	[]	NA	35127	aaacattacagctgcgacaatggaagaagtatacaaacgtgctgagtatgctaaagccattggttctgtagttgtt	467	0	12	24	21	0	0	0	0	0	0	0	0	0	0	0	0	0	221	12	45	0	20	0	28	25	0	0	20	0	0	39	0	0	0	0	0	0
Thalassiosira	0.986842	DQ514808	Thalassiosira	Thalassiosiraceae	Thalassiosirales	Mediophyceae	genus	[]	NA	35127	aaacattacagctgcgacaatggaagaagtatacaaacgtgctgagtatgctaaagctgttggttctgtagttgtt	446	0	0	14	16	0	10	0	0	0	0	0	0	36	0	23	22	17	31	13	45	0	0	0	32	103	0	0	10	13	0	61	0	0	0	0	0	0
Thalassiosira	0.973684	DQ514803	Thalassiosira	Thalassiosiraceae	Thalassiosirales	Mediophyceae	genus	['Thalassiosira sp. 11BOF', 'Thalassiosira sp. 1 SEH-2013', 'Thalassiosira minuscula']	NA	35127	aaacattactgctgcgacaatggaagaagtatacaaacgtgctgagtatgctaaagctattggttctgtaattgtt	442	0	0	0	28	34	0	0	0	0	0	0	0	0	0	0	43	40	42	25	33	14	0	10	0	53	0	0	0	0	0	0	0	15	0	35	44	26
Thalassiosira	0.986842	DQ514808	Thalassiosira	Thalassiosiraceae	Thalassiosirales	Mediophyceae	genus	[]	NA	35127	aaacattacagctgcgacaatggaagaagtatacaaacgtgctgagtatgctaaagctattggttctgtagttgta	437	26	21	63	34	15	13	0	0	0	0	0	0	0	16	0	18	54	16	19	10	19	30	0	24	14	0	0	15	0	0	30	0	0	0	0	0	0
Thalassiosira	0.986842	DQ514808	Thalassiosira	Thalassiosiraceae	Thalassiosirales	Mediophyceae	genus	[]	NA	35127	aaacatcacagctgcgacaatggaagaagtatacaaacgtgctgagtatgctaaagctattggttctgtagttgtt	426	13	11	49	52	14	19	0	0	0	0	0	13	0	14	14	10	22	30	41	22	16	22	0	14	11	0	0	15	0	0	24	0	0	0	0	0	0
Thalassiosira	0.986842	DQ514808	Thalassiosira	Thalassiosiraceae	Thalassiosirales	Mediophyceae	genus	[]	NA	35127	aaacattacagctgcaacaatggaagaagtatacaaacgtgctgagtatgctaaagctattggttctgtagttgtt	426	0	0	15	255	42	0	0	0	0	0	0	0	0	0	0	10	14	21	0	21	0	0	0	16	0	0	0	10	0	0	22	0	0	0	0	0	0
Thalassiosira	0.973684	DQ514808	Thalassiosira	Thalassiosiraceae	Thalassiosirales	Mediophyceae	genus	['Thalassiosira sp. 11BOF', 'Thalassiosira sp. 1 SEH-2013']	NA	35127	aaacattactgctgcgacaatggaagaaatatacaaacgtgctgagtatgctaaagctattggttctgtagttgtt	424	0	0	18	13	0	66	0	0	0	0	11	0	0	0	0	14	11	186	0	15	0	0	0	0	0	0	0	0	0	0	0	0	0	0	42	24	24
Thalassiosira	1	DQ514788	Thalassiosira	Thalassiosiraceae	Thalassiosirales	Mediophyceae	genus	[]	NA	35127	aaacattacagctgctactatggaagaaacatacaaacgtgctgagtatgctaaagccattggttctgtagttgtt	403	0	111	0	0	0	0	0	0	0	0	0	0	0	0	0	0	0	0	0	0	0	0	0	0	0	0	292	0	0	0	0	0	0	0	0	0	0
Thalassiosira	0.986842	DQ514808	Thalassiosira	Thalassiosiraceae	Thalassiosirales	Mediophyceae	genus	[]	NA	35127	aaacattacagctgcgacaatggaagaagtatacaaacgcgctgagtatgctaaagctattggttctgtagttgtt	368	16	0	33	37	0	0	0	0	0	0	0	0	0	0	0	0	11	40	11	49	14	20	0	43	0	0	0	19	17	0	58	0	0	0	0	0	0
Thalassiosira	0.934211	DQ514808	Thalassiosira	Thalassiosiraceae	Thalassiosirales	Mediophyceae	genus	['Thalassiosira sp. 11BOF', 'Thalassiosira sp. 1 SEH-2013']	NA	35127	aaacattactgctgcgacgatggaagaagtatacaaacgtgctaaatatactaaagctattggttctgtagttgtt	324	118	0	0	0	206	0	0	0	0	0	0	0	0	0	0	0	0	0	0	0	0	0	0	0	0	0	0	0	0	0	0	0	0	0	0	0	0
Thalassiosira	0.986842	DQ514808	Thalassiosira	Thalassiosiraceae	Thalassiosirales	Mediophyceae	genus	[]	NA	35127	aaacattacagctgcgacaatagaagaagtatacaaacgtgctgagtatgctaaagctattggttctgtagttgtt	319	184	0	34	15	0	0	0	0	0	0	0	0	0	0	0	0	0	24	0	11	0	0	0	27	0	0	0	10	0	0	14	0	0	0	0	0	0
Thalassiosira	0.973684	DQ514795	Thalassiosira	Thalassiosiraceae	Thalassiosirales	Mediophyceae	genus	['Thalassiosira minuscula', 'Thalassiosira antarctica', 'Thalassiosira sp. 11BOF', 'Thalassiosira angulata']	NA	35127	aaacattacagcggctactatggaagaagtatacaaacgtgctgagtatgctaaagctattggttctgtagttgtt	297	17	10	20	15	0	11	20	0	70	0	0	0	15	0	0	25	15	11	15	10	0	10	0	0	21	0	12	0	0	0	0	0	0	0	0	0	0
Thalassiosira	0.986842	DQ514808	Thalassiosira	Thalassiosiraceae	Thalassiosirales	Mediophyceae	genus	[]	NA	35127	aagcattacagctgcgacaatggaagaagtatacaaacgtgctgagtatgctaaagctattggttctgtagttgtt	297	0	0	13	17	0	13	0	0	10	0	0	0	0	0	0	0	10	33	13	44	0	16	0	23	14	0	0	22	14	0	55	0	0	0	0	0	0
Thalassiosira	0.973684	DQ514808	Thalassiosira	Thalassiosiraceae	Thalassiosirales	Mediophyceae	genus	['Thalassiosira sp. 11BOF', 'Thalassiosira sp. 1 SEH-2013']	NA	35127	aaacattactgctgcgacaatggaagaagtatacaaacgtgctgagtatgctaaagctattggttctttagttgtt	294	0	0	0	10	0	0	0	0	0	0	11	0	0	0	0	11	16	31	0	25	0	0	0	0	0	0	0	0	0	0	16	10	13	0	69	37	45
Thalassiosira	0.960526	DQ514808	Thalassiosira	Thalassiosiraceae	Thalassiosirales	Mediophyceae	genus	['Thalassiosira sp. 11BOF', 'Thalassiosira sp. 1 SEH-2013']	NA	35127	aaacattactgctgcgacgatggaagaagtatacaaacgtgctgagtatgctaaagctattggttctgtagttatt	273	0	0	0	261	0	0	0	0	0	12	0	0	0	0	0	0	0	0	0	0	0	0	0	0	0	0	0	0	0	0	0	0	0	0	0	0	0
Thalassiosira	0.973684	DQ514808	Thalassiosira	Thalassiosiraceae	Thalassiosirales	Mediophyceae	genus	['Thalassiosira sp. 11BOF', 'Thalassiosira sp. 1 SEH-2013']	NA	35127	aaacattacagctgcgacaatggaagaagtatacaaatgtgctgagtatgctaaagctattggttccgtagttgtt	248	0	0	0	248	0	0	0	0	0	0	0	0	0	0	0	0	0	0	0	0	0	0	0	0	0	0	0	0	0	0	0	0	0	0	0	0	0
Thalassiosira	0.973684	DQ514808	Thalassiosira	Thalassiosiraceae	Thalassiosirales	Mediophyceae	genus	['Thalassiosira sp. 11BOF', 'Thalassiosira sp. 1 SEH-2013']	NA	35127	aaacattactgctgcgacaatggaagaagtatacaaacgtgctgagtatgctaaagctattggtactgtagttgtt	246	0	0	0	13	0	0	0	0	0	0	0	0	0	0	0	14	15	46	11	11	0	0	0	0	0	0	0	0	0	0	14	10	15	0	39	30	28
Thalassiosira	0.986842	DQ514808	Thalassiosira	Thalassiosiraceae	Thalassiosirales	Mediophyceae	genus	[]	NA	35127	aaacattacagctgcgacaatggaagaaatatacaaacgtgctgagtatgctaaagctattggttctgtagttgtt	223	0	0	0	0	0	0	144	0	0	0	0	0	0	0	0	0	0	34	0	11	0	0	0	0	0	0	0	0	0	0	34	0	0	0	0	0	0
Thalassiosira	0.973684	DQ514803	Thalassiosira	Thalassiosiraceae	Thalassiosirales	Mediophyceae	genus	['Thalassiosira sp. 11BOF', 'Thalassiosira sp. 1 SEH-2013', 'Thalassiosira minuscula']	NA	35127	aaacgttacagctgctacaatggaagaagtatacaaacgtgctgagtatgctaaagctattggttctgtagttgtt	219	0	0	0	0	0	0	0	0	0	10	46	40	24	0	20	12	0	0	16	0	51	0	0	0	0	0	0	0	0	0	0	0	0	0	0	0	0
Thalassiosira	0.986842	DQ514803	Thalassiosira	Thalassiosiraceae	Thalassiosirales	Mediophyceae	genus	['Thalassiosira sp. 11BOF', 'Thalassiosira minuscula']	NA	35127	aaacattacagctgctacaatggaagaagtatacaaacgtgctgagtatgctaaagctattggttctgtagttgtt	213	0	0	18	19	0	0	0	0	0	0	0	0	0	0	0	10	12	31	0	26	0	10	0	25	0	0	13	13	0	0	22	0	0	0	0	0	14
Thalassiosira	0.973684	DQ514808	Thalassiosira	Thalassiosiraceae	Thalassiosirales	Mediophyceae	genus	['Thalassiosira sp. 11BOF', 'Thalassiosira sp. 1 SEH-2013']	NA	35127	aaacattactgctgcgacaatggaagatgtatacaaacgtgctgagtatgctaaagctattggttctgtagttgtt	204	0	0	0	0	0	0	0	0	0	0	0	0	0	0	0	14	10	37	0	18	0	0	0	0	0	0	0	0	0	0	0	11	10	10	40	27	27
Thalassiosira	0.973684	DQ514808	Thalassiosira	Thalassiosiraceae	Thalassiosirales	Mediophyceae	genus	['Thalassiosira sp. 11BOF', 'Thalassiosira sp. 1 SEH-2013']	NA	35127	aaacattactgctgcgacaatggaagaagtatacaaacgtgctgagtatgctaaagctattggttctgttgttgtt	200	0	0	0	0	0	0	0	0	0	0	0	0	0	0	0	0	13	32	0	15	0	12	0	0	0	0	0	0	0	0	0	10	0	12	42	32	32
Thalassiosira	0.947368	DQ514808	Thalassiosira	Thalassiosiraceae	Thalassiosirales	Mediophyceae	genus	['Thalassiosira sp. 11BOF', 'Thalassiosira sp. 1 SEH-2013']	NA	35127	aaacattactgctgcgacaatagaagaagtatacaaacgtgctaagtatgctaaagctattggttctatagttgtt	199	0	0	0	0	0	0	0	0	0	199	0	0	0	0	0	0	0	0	0	0	0	0	0	0	0	0	0	0	0	0	0	0	0	0	0	0	0
Thalassiosira	0.986842	DQ514808	Thalassiosira	Thalassiosiraceae	Thalassiosirales	Mediophyceae	genus	[]	NA	35127	aaacattacagctgcgacaatggaagaagtatacaaacgtgctgagtatactaaagctattggttctgtagttgtt	195	0	0	0	15	0	0	0	0	0	0	0	0	65	0	0	13	0	21	0	22	0	13	0	10	0	0	0	11	0	0	25	0	0	0	0	0	0
Thalassiosira	0.960526	DQ514808	Thalassiosira	Thalassiosiraceae	Thalassiosirales	Mediophyceae	genus	['Thalassiosira sp. 11BOF', 'Thalassiosira sp. 1 SEH-2013']	NA	35127	aaatattactgctgcgacgatggaagaagtatacaaacgtgctgagtatgctaaagctattggttctgtagttgtt	183	75	0	0	0	0	0	0	0	0	0	0	0	0	0	0	0	108	0	0	0	0	0	0	0	0	0	0	0	0	0	0	0	0	0	0	0	0
Thalassiosira	0.986842	DQ514808	Thalassiosira	Thalassiosiraceae	Thalassiosirales	Mediophyceae	genus	[]	NA	35127	aaacattacagctgcgacaatggaagaagtatacaaacgtgctgagtatgctaaagatattggttctgtagttgtt	164	0	0	19	17	0	0	0	0	0	0	0	0	0	0	0	0	0	25	0	31	0	13	0	13	0	0	0	12	0	0	34	0	0	0	0	0	0
Thalassiosira	0.973684	KC986066	Thalassiosira	Thalassiosiraceae	Thalassiosirales	Mediophyceae	genus	['Thalassiosira sp. 1 SEH-2013']	NA	35127	aaacattactgttgcgataatggaagaagtatacaaacgtgctgagtatgctaaagctattggttctgtagttgtt	164	0	164	0	0	0	0	0	0	0	0	0	0	0	0	0	0	0	0	0	0	0	0	0	0	0	0	0	0	0	0	0	0	0	0	0	0	0
Thalassiosira	0.973684	DQ514795	Thalassiosira	Thalassiosiraceae	Thalassiosirales	Mediophyceae	genus	['Thalassiosira sp. 10BOF', 'Thalassiosira antarctica', 'Thalassiosira angulata']	NA	35127	aaacgttacagctgctactatggaagaagtatacaaacgtgctgagtatgctaaagctattggttctgtagttgtt	161	0	0	0	10	0	0	0	0	0	0	24	43	28	29	27	0	0	0	0	0	0	0	0	0	0	0	0	0	0	0	0	0	0	0	0	0	0
Thalassiosira	0.960526	DQ514808	Thalassiosira	Thalassiosiraceae	Thalassiosirales	Mediophyceae	genus	['Thalassiosira sp. 11BOF', 'Thalassiosira sp. 1 SEH-2013']	NA	35127	aaacattactgccgcgacgatggaagaagtatacaaacgtgctgagtatgctaaagctattggttctgtagttgtt	157	0	17	12	18	0	0	0	0	0	0	0	0	0	0	0	0	0	0	0	37	0	0	0	32	22	0	0	19	0	0	0	0	0	0	0	0	0
Thalassiosira	0.973684	DQ514808	Thalassiosira	Thalassiosiraceae	Thalassiosirales	Mediophyceae	genus	['Thalassiosira sp. 11BOF', 'Thalassiosira sp. 1 SEH-2013']	NA	35127	aaacattactgctgcgacaatggaagaagtatacaaacgtgctgattatgctaaagctattggttctgtagttgtt	156	0	0	0	0	0	0	0	0	0	0	0	0	0	0	0	0	16	26	0	19	0	0	0	0	0	0	0	0	0	0	0	12	0	0	35	22	26
Thalassiosira	0.960526	DQ514808	Thalassiosira	Thalassiosiraceae	Thalassiosirales	Mediophyceae	genus	['Thalassiosira sp. 11BOF', 'Thalassiosira sp. 1 SEH-2013']	NA	35127	aaacattactgccgcgacaatggaagaagtatacaaatgtgctgagtatgctaaagctattggttctgtagttgtt	154	0	0	0	0	0	0	0	0	0	0	0	0	0	0	0	0	0	0	0	154	0	0	0	0	0	0	0	0	0	0	0	0	0	0	0	0	0
Thalassiosira	0.973684	KC969854	Thalassiosira	Thalassiosiraceae	Thalassiosirales	Mediophyceae	genus	['Thalassiosira sp. 11BOF', 'Thalassiosira minuscula']	NA	35127	aaacgttacagcagctactatggaagaagtatacaaacgtgctgagtatgctaaagctattggttctgtagttgtt	150	0	0	68	14	0	11	0	0	0	0	26	31	0	0	0	0	0	0	0	0	0	0	0	0	0	0	0	0	0	0	0	0	0	0	0	0	0
Thalassiosira	0.960526	KC986066	Thalassiosira	Thalassiosiraceae	Thalassiosirales	Mediophyceae	genus	['Thalassiosira sp. 1 SEH-2013']	NA	35127	aaacattactgttgtgacgatggaagaagtatacaaacgtgctgagtatgctaaagctattggttctgtagttgtt	146	0	0	146	0	0	0	0	0	0	0	0	0	0	0	0	0	0	0	0	0	0	0	0	0	0	0	0	0	0	0	0	0	0	0	0	0	0
Thalassiosira	0.960526	DQ514808	Thalassiosira	Thalassiosiraceae	Thalassiosirales	Mediophyceae	genus	['Thalassiosira sp. 11BOF', 'Thalassiosira sp. 1 SEH-2013']	NA	35127	aaacattactgctgcgacgatggaagaagtatacaaacgtactgagtatgctaaagctattggttctgtagttgtt	138	0	0	0	0	0	0	138	0	0	0	0	0	0	0	0	0	0	0	0	0	0	0	0	0	0	0	0	0	0	0	0	0	0	0	0	0	0
Thalassiosira	0.986842	DQ514808	Thalassiosira	Thalassiosiraceae	Thalassiosirales	Mediophyceae	genus	[]	NA	35127	aaacattacagctgcgacaatggaagaagtatacaaacgtgctgagtatgctaaagctattgattctgtagttgtt	137	0	0	0	13	0	0	0	78	0	0	0	0	0	0	0	0	0	13	0	13	0	0	0	0	0	0	0	10	0	0	10	0	0	0	0	0	0
Thalassiosira	0.986842	DQ514808	Thalassiosira	Thalassiosiraceae	Thalassiosirales	Mediophyceae	genus	[]	NA	35127	aaacattacagctgcgacaatggaagaagtatacaaacgtgctgagtatgataaagctattggttctgtagttgtt	128	0	0	15	15	0	0	0	0	0	0	0	0	0	0	0	0	0	23	0	19	0	10	0	0	0	0	0	10	10	0	26	0	0	0	0	0	0
Thalassiosira	0.986842	DQ514808	Thalassiosira	Thalassiosiraceae	Thalassiosirales	Mediophyceae	genus	[]	NA	35127	aaacattacagctgcgacaatggaagaagtatacaaacgtgctgagtatgctaaagttattggttctgtagttgtt	124	0	0	20	41	0	0	0	0	0	0	0	0	0	0	0	0	0	0	13	10	0	0	0	0	0	0	0	10	0	0	30	0	0	0	0	0	0
Thalassiosira	0.973684	DQ514808	Thalassiosira	Thalassiosiraceae	Thalassiosirales	Mediophyceae	genus	['Thalassiosira sp. 11BOF', 'Thalassiosira sp. 1 SEH-2013']	NA	35127	aaacattactgctgcgacaatcgaagaagtatacaaacgtgctgagtatgctaaagctattggttctgtagttgtt	124	0	0	0	0	0	0	0	0	0	0	0	0	0	0	0	0	12	27	0	0	0	0	0	0	0	0	0	0	0	0	0	0	0	0	39	21	25
Thalassiosira	0.986842	DQ514808	Thalassiosira	Thalassiosiraceae	Thalassiosirales	Mediophyceae	genus	[]	NA	35127	aaacattacagctgcgacaatggatgaagtatacaaacgtgctgagtatgctaaagctattggttctgtagttgtt	118	0	0	0	17	0	0	0	0	0	0	0	0	0	0	0	0	0	19	0	17	0	10	0	10	0	0	0	0	0	0	45	0	0	0	0	0	0
Thalassiosira	0.986842	DQ514808	Thalassiosira	Thalassiosiraceae	Thalassiosirales	Mediophyceae	genus	[]	NA	35127	aaacattacagctgcgacaatggaagaagtatacaaacgtgatgagtatgctaaagctattggttctgtagttgtt	116	0	0	0	19	0	0	0	0	0	0	0	0	0	0	0	0	0	26	0	22	0	15	0	0	0	0	0	13	0	0	21	0	0	0	0	0	0
Thalassiosira	0.947368	DQ514808	Thalassiosira	Thalassiosiraceae	Thalassiosirales	Mediophyceae	genus	['Thalassiosira sp. 11BOF', 'Thalassiosira sp. 1 SEH-2013']	NA	35127	aaacattactgctgcgacaataaaagaagtatacaaacgtactgagtatgctaaagctattggttctgtagttgtt	115	0	0	0	115	0	0	0	0	0	0	0	0	0	0	0	0	0	0	0	0	0	0	0	0	0	0	0	0	0	0	0	0	0	0	0	0	0
Thalassiosira	0.973684	KC969860	Thalassiosira	Thalassiosiraceae	Thalassiosirales	Mediophyceae	genus	[]	NA	35127	aaacgttacggcttctactatggaagaagtatacaaacgcgctgagtatgctaaagcactcggttctattgttatt	107	0	0	0	0	0	0	0	0	0	0	0	0	0	0	0	107	0	0	0	0	0	0	0	0	0	0	0	0	0	0	0	0	0	0	0	0	0
Thalassiosira	0.973684	DQ514808	Thalassiosira	Thalassiosiraceae	Thalassiosirales	Mediophyceae	genus	['Thalassiosira sp. 11BOF', 'Thalassiosira sp. 1 SEH-2013']	NA	35127	aaacattactgctgcgacaatggaagaagtatacaaacgtgctgagtatgctaaagctattggttctctagttgtt	102	0	0	0	0	0	0	0	0	0	0	0	0	0	0	0	0	0	28	0	0	0	0	0	0	0	0	0	0	0	0	0	0	0	0	29	25	20
Thalassiosira	0.973684	DQ514808	Thalassiosira	Thalassiosiraceae	Thalassiosirales	Mediophyceae	genus	['Thalassiosira sp. 11BOF', 'Thalassiosira sp. 1 SEH-2013']	NA	35127	aaacattacagctgcgacaatggaagaagtatacaaacgtgctgaatatgctaaagctattggttctgtagttatt	100	0	100	0	0	0	0	0	0	0	0	0	0	0	0	0	0	0	0	0	0	0	0	0	0	0	0	0	0	0	0	0	0	0	0	0	0	0
Thalassiosira	0.934211	DQ514808	Thalassiosira	Thalassiosiraceae	Thalassiosirales	Mediophyceae	genus	['Thalassiosira sp. 11BOF', 'Thalassiosira sp. 1 SEH-2013']	NA	35127	aaacattactgctgcgacaacggaagaagtatacaaacgtgctgagtatgctaaaactattaattctgtagttgtt	99	0	0	0	99	0	0	0	0	0	0	0	0	0	0	0	0	0	0	0	0	0	0	0	0	0	0	0	0	0	0	0	0	0	0	0	0	0
Thalassiosira	0.973684	DQ514795	Thalassiosira	Thalassiosiraceae	Thalassiosirales	Mediophyceae	genus	['Thalassiosira antarctica', 'Thalassiosira angulata']	NA	35127	aaacatcacagcggctactatggaagaagtatacaaacgtgctgagtatgctaaagctattggttctatagttgtt	97	0	0	0	11	0	0	0	0	0	0	0	0	37	0	0	0	0	0	0	0	0	12	0	0	37	0	0	0	0	0	0	0	0	0	0	0	0
Thalassiosira	0.960526	DQ514808	Thalassiosira	Thalassiosiraceae	Thalassiosirales	Mediophyceae	genus	['Thalassiosira sp. 11BOF', 'Thalassiosira sp. 1 SEH-2013']	NA	35127	aaacattactgctgcgacaatggaagaggtatacaaacgtgctgagtatgctaaagctactggttctgtagttgtt	95	0	0	0	0	0	0	0	0	0	0	95	0	0	0	0	0	0	0	0	0	0	0	0	0	0	0	0	0	0	0	0	0	0	0	0	0	0
Thalassiosira	0.947368	KC802088	Thalassiosira	Thalassiosiraceae	Thalassiosirales	Mediophyceae	genus	['Thalassiosira sundarbana', 'Thalassiosira sp. 10BOF']	NA	35127	aaacgtaactgcagcgactatggaagaagtatacaaacgtgctgagtatgctaaagctattggttctgtagttgtt	91	0	0	0	0	0	0	0	0	0	0	0	13	0	0	12	20	22	0	14	0	0	0	10	0	0	0	0	0	0	0	0	0	0	0	0	0	0
Thalassiosira	0.986842	DQ514808	Thalassiosira	Thalassiosiraceae	Thalassiosirales	Mediophyceae	genus	[]	NA	35127	aaacattacagctgcgactatggaagaagtatacaaacgtgctgagtatgctaaagctattggttctgtagttgtt	75	0	0	11	13	0	0	0	0	0	0	0	0	0	0	0	0	0	15	0	0	0	0	0	12	0	0	0	10	0	0	14	0	0	0	0	0	0
Thalassiosira	0.960526	DQ514808	Thalassiosira	Thalassiosiraceae	Thalassiosirales	Mediophyceae	genus	['Thalassiosira sp. 11BOF', 'Thalassiosira sp. 1 SEH-2013']	NA	35127	aaacattactgctgcgacgatggaagaagtatacaaacgtgctgagtatgctaaagctattggttttgtagttgtt	69	0	0	0	0	0	0	0	0	69	0	0	0	0	0	0	0	0	0	0	0	0	0	0	0	0	0	0	0	0	0	0	0	0	0	0	0	0
Thalassiosira	0.973684	DQ514808	Thalassiosira	Thalassiosiraceae	Thalassiosirales	Mediophyceae	genus	['Thalassiosira sp. 11BOF', 'Thalassiosira sp. 1 SEH-2013']	NA	35127	aaacattacagctgcgacaatggaagaagtatacaaacgtgctgagtatgctaaagctattaattctgtagttgtt	67	0	0	0	0	0	67	0	0	0	0	0	0	0	0	0	0	0	0	0	0	0	0	0	0	0	0	0	0	0	0	0	0	0	0	0	0	0
Thalassiosira	0.960526	KC802088	Thalassiosira	Thalassiosiraceae	Thalassiosirales	Mediophyceae	genus	['Thalassiosira sundarbana', 'Thalassiosira sp. 10BOF']	NA	35127	aaacgtaacagctgcaacaatggaagaagtgtacaaacgtgctgagtatgctaaagctattggttctgtagttgtt	63	0	0	0	0	0	0	0	0	0	0	0	0	13	0	0	0	0	0	18	0	0	0	0	0	32	0	0	0	0	0	0	0	0	0	0	0	0
Thalassiosira	0.960526	DQ514808	Thalassiosira	Thalassiosiraceae	Thalassiosirales	Mediophyceae	genus	['Thalassiosira sp. 11BOF', 'Thalassiosira sp. 1 SEH-2013']	NA	35127	aaacattactgctgcgacgatggaagaagtatacaaatgtgctgagtatgctaaagctattggttctgtagttgtt	62	0	0	20	0	0	0	0	0	0	0	0	0	0	0	0	0	0	42	0	0	0	0	0	0	0	0	0	0	0	0	0	0	0	0	0	0	0
Thalassiosira	0.960526	DQ514808	Thalassiosira	Thalassiosiraceae	Thalassiosirales	Mediophyceae	genus	['Thalassiosira sp. 11BOF', 'Thalassiosira sp. 1 SEH-2013']	NA	35127	aaacattactgctgcgatgatggaagaagtatacaaacgtgctgagtatgctaaagctattggttctgtagttgtt	60	15	0	0	45	0	0	0	0	0	0	0	0	0	0	0	0	0	0	0	0	0	0	0	0	0	0	0	0	0	0	0	0	0	0	0	0	0
Thalassiosira	0.960526	DQ514808	Thalassiosira	Thalassiosiraceae	Thalassiosirales	Mediophyceae	genus	['Thalassiosira sp. 11BOF', 'Thalassiosira sp. 1 SEH-2013']	NA	35127	aaacattactgctgcgacgatggaagaagtatacaaacgtgctgaatatgctaaagctattggttctgtagttgtt	60	0	0	12	48	0	0	0	0	0	0	0	0	0	0	0	0	0	0	0	0	0	0	0	0	0	0	0	0	0	0	0	0	0	0	0	0	0
Thalassiosira	0.960526	KC802088	Thalassiosira	Thalassiosiraceae	Thalassiosirales	Mediophyceae	genus	['Thalassiosira sundarbana', 'Thalassiosira sp. 10BOF']	NA	35127	aaacgtaactgctgccactatggaagaagtatacaaacgtgctgagtatgctaaagctattggttctgtagttgtt	59	0	0	0	0	0	0	0	0	0	0	0	0	0	0	21	0	0	0	0	0	0	0	0	0	11	0	0	0	0	0	27	0	0	0	0	0	0
Thalassiosira	0.973684	KC969854	Thalassiosira	Thalassiosiraceae	Thalassiosirales	Mediophyceae	genus	['Thalassiosira sp. 11BOF', 'Thalassiosira minuscula']	NA	35127	aaacgtgacagcagctacaatggaagaagtatacaaacgtgctgagtatgctaaagctattggttctgtagttgtt	57	0	0	0	0	0	0	0	0	0	0	0	0	0	0	0	11	18	0	0	0	15	13	0	0	0	0	0	0	0	0	0	0	0	0	0	0	0
Thalassiosira	0.960526	DQ514808	Thalassiosira	Thalassiosiraceae	Thalassiosirales	Mediophyceae	genus	['Thalassiosira sp. 11BOF', 'Thalassiosira sp. 1 SEH-2013']	NA	35127	aaacattactgctgcgacaatggaaaaagtatacaaacgtgctgagtatgctaaaactattggttctgtagttgtt	55	55	0	0	0	0	0	0	0	0	0	0	0	0	0	0	0	0	0	0	0	0	0	0	0	0	0	0	0	0	0	0	0	0	0	0	0	0
Thalassiosira	0.973684	DQ514795	Thalassiosira	Thalassiosiraceae	Thalassiosirales	Mediophyceae	genus	['Thalassiosira antarctica', 'Thalassiosira angulata']	NA	35127	aaatattacagctgctactatggaagaagtatacaaacgtgctgagtatgctaaagctattggttctgtagttgtt	51	0	0	51	0	0	0	0	0	0	0	0	0	0	0	0	0	0	0	0	0	0	0	0	0	0	0	0	0	0	0	0	0	0	0	0	0	0
Thalassiosira	0.960526	KC802088	Thalassiosira	Thalassiosiraceae	Thalassiosirales	Mediophyceae	genus	['Thalassiosira sundarbana', 'Thalassiosira sp. 10BOF']	NA	35127	aaacgtaactgcagcaactatggaagaagtatacaaacgtgctgagtatgctaaagctattggttctgtagttgtt	50	0	0	0	0	0	0	0	0	0	0	0	0	0	0	0	0	13	0	17	0	0	0	0	0	20	0	0	0	0	0	0	0	0	0	0	0	0
Thalassiosira	0.973684	DQ514803	Thalassiosira	Thalassiosiraceae	Thalassiosirales	Mediophyceae	genus	['Thalassiosira sp. 11BOF', 'Thalassiosira sp. 1 SEH-2013', 'Thalassiosira minuscula']	NA	35127	aaacattacagctgcgacaatggaagaagtatacaaacgtgctgagtatgctaaagctattggttctgtaattatt	40	0	0	0	0	0	0	0	0	0	0	0	0	0	0	0	0	0	0	0	0	0	0	0	0	12	0	0	0	0	0	28	0	0	0	0	0	0
Thalassiosira	0.986842	DQ514808	Thalassiosira	Thalassiosiraceae	Thalassiosirales	Mediophyceae	genus	[]	NA	35127	aatcattacagctgcgacaatggaagaagtatacaaacgtgctgagtatgctaaagctattggttctgtagttgtt	39	0	0	0	0	0	0	0	0	0	0	0	0	0	0	0	0	0	15	0	10	0	0	0	14	0	0	0	0	0	0	0	0	0	0	0	0	0
Thalassiosira	0.973684	KC986066	Thalassiosira	Thalassiosiraceae	Thalassiosirales	Mediophyceae	genus	['Thalassiosira sp. 1 SEH-2013']	NA	35127	aaacattattgttgcgacaatggaagaagtatacaaacgtgctgagtatgctaaagctattggttctgtagttgtt	36	0	0	0	0	0	36	0	0	0	0	0	0	0	0	0	0	0	0	0	0	0	0	0	0	0	0	0	0	0	0	0	0	0	0	0	0	0
Thalassiosira	0.947368	KC802088	Thalassiosira	Thalassiosiraceae	Thalassiosirales	Mediophyceae	genus	['Thalassiosira sundarbana', 'Thalassiosira sp. 10BOF']	NA	35127	aaacgtaactgctgccactatggaagaagtttacaaacgtgctgagtatgctaaagctattggttctgtagttgtt	35	0	0	0	0	0	0	0	0	0	0	0	0	0	0	0	10	0	0	0	0	0	0	0	0	0	0	0	11	0	0	14	0	0	0	0	0	0
Thalassiosira	0.960526	DQ514808	Thalassiosira	Thalassiosiraceae	Thalassiosirales	Mediophyceae	genus	['Thalassiosira sp. 11BOF', 'Thalassiosira sp. 1 SEH-2013']	NA	35127	aaacattattgctgcgacaatggaagaagtatataaacgtgctgagtatgctaaagctattggttctgtagttgtt	35	35	0	0	0	0	0	0	0	0	0	0	0	0	0	0	0	0	0	0	0	0	0	0	0	0	0	0	0	0	0	0	0	0	0	0	0	0
Thalassiosira	1	KC284709	Thalassiosira	Thalassiosiraceae	Thalassiosirales	Mediophyceae	genus	[]	NA	35127	aaacattacagctgctactatggaagaagtgtacaaacgtgctgagtacgctaaagctatcggttctgtaattgtt	35	0	0	0	0	0	0	0	0	0	0	0	0	0	0	0	0	0	0	0	0	0	0	0	0	0	35	0	0	0	0	0	0	0	0	0	0	0
Thalassiosira	0.910256	DQ514799	Thalassiosira	Thalassiosiraceae	Thalassiosirales	Mediophyceae	genus	['Thalassiosira sundarbana', 'Thalassiosira oceanica']	NA	35127	aaacattacagctgcaactcaagaagaagtatacaaacgtgctgagtatgctaaacaaattggttctattgttatt	33	0	0	0	0	0	0	0	0	0	0	0	0	0	0	0	0	0	0	0	0	0	0	0	0	33	0	0	0	0	0	0	0	0	0	0	0	0
Thalassiosira	0.973684	DQ514808	Thalassiosira	Thalassiosiraceae	Thalassiosirales	Mediophyceae	genus	['Thalassiosira sp. 11BOF', 'Thalassiosira sp. 1 SEH-2013']	NA	35127	aaacattacagctgcgacaatggaagaagtatccaaacgtgttgagtatgctaaagctattggttctgtagttgtt	32	0	0	0	0	0	0	0	0	0	0	0	0	0	0	0	0	0	0	0	0	0	0	0	0	0	0	0	0	0	0	32	0	0	0	0	0	0
Thalassiosira	0.960526	DQ514808	Thalassiosira	Thalassiosiraceae	Thalassiosirales	Mediophyceae	genus	['Thalassiosira sp. 11BOF', 'Thalassiosira sp. 1 SEH-2013']	NA	35127	aaacattactgctgcgataatggaagaagtatacaaatgtgctgagtatgctaaagctattggttctgtagttgtt	29	0	0	0	29	0	0	0	0	0	0	0	0	0	0	0	0	0	0	0	0	0	0	0	0	0	0	0	0	0	0	0	0	0	0	0	0	0
Thalassiosira	0.986842	DQ514808	Thalassiosira	Thalassiosiraceae	Thalassiosirales	Mediophyceae	genus	[]	NA	35127	aaacattacagctgcgacaatggaagaattatacaaacgtgctgagtatgctaaagctattggttctgtagttgtt	28	0	0	0	0	0	0	0	0	0	0	0	0	0	0	0	0	0	0	0	11	0	0	0	0	0	0	0	0	0	0	17	0	0	0	0	0	0
Thalassiosira	0.960526	DQ514808	Thalassiosira	Thalassiosiraceae	Thalassiosirales	Mediophyceae	genus	['Thalassiosira sp. 11BOF', 'Thalassiosira sp. 1 SEH-2013']	NA	35127	aaacattactgctgcgacgatggaagaagtatacaaacgtgctaagtatgctaaagctattggttctgtagttgtt	26	0	11	0	0	0	0	0	0	0	0	0	0	0	0	0	0	0	0	0	15	0	0	0	0	0	0	0	0	0	0	0	0	0	0	0	0	0
Thalassiosira	0.960526	DQ514808	Thalassiosira	Thalassiosiraceae	Thalassiosirales	Mediophyceae	genus	['Thalassiosira sp. 11BOF', 'Thalassiosira sp. 1 SEH-2013']	NA	35127	aaacattactgctgcgacaatggaagaagtatacaaacgtgctgaatatactaaagctattggttctgtagttgtt	25	0	0	25	0	0	0	0	0	0	0	0	0	0	0	0	0	0	0	0	0	0	0	0	0	0	0	0	0	0	0	0	0	0	0	0	0	0
Thalassiosira	0.960526	DQ514808	Thalassiosira	Thalassiosiraceae	Thalassiosirales	Mediophyceae	genus	['Thalassiosira sp. 11BOF', 'Thalassiosira sp. 1 SEH-2013']	NA	35127	aaacattactgctgcgacaatggaagaagtatacaaacgtgctgagtatgctaaagttattggctctgtagttgtt	25	0	0	0	15	0	0	0	0	0	0	0	0	0	0	0	0	0	0	0	0	0	0	0	0	0	0	10	0	0	0	0	0	0	0	0	0	0
Thalassiosira	0.960526	DQ514808	Thalassiosira	Thalassiosiraceae	Thalassiosirales	Mediophyceae	genus	['Thalassiosira sp. 11BOF', 'Thalassiosira sp. 1 SEH-2013']	NA	35127	aaacattacagctgcgacaatggaagaaacatacaaacgtgctgagtatgctaaagctattggttctatagttgtt	24	0	0	0	10	0	0	0	0	0	0	0	0	0	0	0	0	0	0	0	14	0	0	0	0	0	0	0	0	0	0	0	0	0	0	0	0	0
Thalassiosira	0.960526	DQ514808	Thalassiosira	Thalassiosiraceae	Thalassiosirales	Mediophyceae	genus	['Thalassiosira sp. 11BOF', 'Thalassiosira sp. 1 SEH-2013']	NA	35127	aaacattactgctgcgacaatggaagaagtatataaatgtgctgagtatgctaaagctattggttctgtagttgtt	24	0	0	0	0	0	24	0	0	0	0	0	0	0	0	0	0	0	0	0	0	0	0	0	0	0	0	0	0	0	0	0	0	0	0	0	0	0
Thalassiosira	0.947368	KC802088	Thalassiosira	Thalassiosiraceae	Thalassiosirales	Mediophyceae	genus	['Thalassiosira sundarbana', 'Thalassiosira sp. 10BOF']	NA	35127	aaatgtaactgctgccactatggaagaagtatacaaacgtgctgagtatgctaaagctattggttctgtagttgtt	23	0	0	0	0	0	0	0	0	0	0	0	0	0	0	23	0	0	0	0	0	0	0	0	0	0	0	0	0	0	0	0	0	0	0	0	0	0
Thalassiosira	0.947368	KC986066	Thalassiosira	Thalassiosiraceae	Thalassiosirales	Mediophyceae	genus	['Thalassiosira sp. 1 SEH-2013']	NA	35127	aaacattaccggcgcaactatggaagaagtatacaaacgtgctgagtatgctaaagctattggttctgtagttgtt	21	0	0	0	0	0	0	0	0	0	0	0	0	0	0	11	0	0	0	0	0	0	0	0	0	10	0	0	0	0	0	0	0	0	0	0	0	0
Thalassiosira	0.960526	DQ514808	Thalassiosira	Thalassiosiraceae	Thalassiosirales	Mediophyceae	genus	['Thalassiosira sp. 11BOF', 'Thalassiosira sp. 1 SEH-2013']	NA	35127	aaacattactgctgcgacaatggaaggagtatacaaacgtgctgagtatgctaaagctattggttctgtagttgct	21	0	0	0	0	0	0	0	0	0	0	0	0	0	0	0	0	0	0	0	0	0	0	0	0	0	0	0	0	0	0	0	0	0	0	0	0	21
Thalassiosira	0.960526	DQ514808	Thalassiosira	Thalassiosiraceae	Thalassiosirales	Mediophyceae	genus	['Thalassiosira sp. 11BOF', 'Thalassiosira sp. 1 SEH-2013']	NA	35127	aaacattattgctgcgacaatggaagaagtatacaaacgtgctgagtatgctaaagttattggttctgtagttgtt	21	0	0	0	0	0	0	0	21	0	0	0	0	0	0	0	0	0	0	0	0	0	0	0	0	0	0	0	0	0	0	0	0	0	0	0	0	0
Thalassiosira	0.947368	DQ514808	Thalassiosira	Thalassiosiraceae	Thalassiosirales	Mediophyceae	genus	['Thalassiosira sp. 11BOF', 'Thalassiosira sp. 1 SEH-2013']	NA	35127	aaatattactgctgcgacaatggaagaagtatacaaacgtgctgagtatgttaaagttattggttctgtagttgtt	21	0	0	0	21	0	0	0	0	0	0	0	0	0	0	0	0	0	0	0	0	0	0	0	0	0	0	0	0	0	0	0	0	0	0	0	0	0
Thalassiosira	0.935065	DQ514808	Thalassiosira	Thalassiosiraceae	Thalassiosirales	Mediophyceae	genus	['Thalassiosira sp. 11BOF', 'Thalassiosira sp. 1 SEH-2013']	NA	35127	aaacattacagctgcgacaatggaagaagtatacaaacgttctgagtatgctaaatcagttggttctgtagttatt	20	0	0	0	0	0	0	0	0	0	0	0	0	0	0	0	0	0	0	0	0	0	0	0	0	0	0	0	0	0	0	20	0	0	0	0	0	0
Thalassiosira	0.960526	KC986066	Thalassiosira	Thalassiosiraceae	Thalassiosirales	Mediophyceae	genus	['Thalassiosira sp. 1 SEH-2013']	NA	35127	aaacattattgttgcgacgatggaagaagtatacaaacgtgctgagtatgctaaagctattggttctgtagttgtt	20	0	0	0	0	0	20	0	0	0	0	0	0	0	0	0	0	0	0	0	0	0	0	0	0	0	0	0	0	0	0	0	0	0	0	0	0	0
Thalassiosira	0.947368	DQ514808	Thalassiosira	Thalassiosiraceae	Thalassiosirales	Mediophyceae	genus	['Thalassiosira sp. 11BOF', 'Thalassiosira sp. 1 SEH-2013']	NA	35127	aaacattactgctacgacgatggaagaaatatacaaacgtgctgagtatgctaaagctattggttctgtagttgtt	20	0	0	0	0	20	0	0	0	0	0	0	0	0	0	0	0	0	0	0	0	0	0	0	0	0	0	0	0	0	0	0	0	0	0	0	0	0
Thalassiosira	0.960526	DQ514808	Thalassiosira	Thalassiosiraceae	Thalassiosirales	Mediophyceae	genus	['Thalassiosira sp. 11BOF', 'Thalassiosira sp. 1 SEH-2013']	NA	35127	aaacattactgctgcggtaatggaagaagtatacaaacgtgctgagtatgctaaagctattggttctgtagttgtt	18	0	0	0	0	0	0	0	0	0	0	0	18	0	0	0	0	0	0	0	0	0	0	0	0	0	0	0	0	0	0	0	0	0	0	0	0	0
Thalassiosira	0.934211	DQ514802	Thalassiosira	Thalassiosiraceae	Thalassiosirales	Mediophyceae	genus	['Thalassiosira sundarbana']	NA	35127	aaatgtaacagctgtaacaatggaagaagtatacaaacgtgctgagtatgctaaaactattggttctattgttatt	18	0	0	0	0	0	18	0	0	0	0	0	0	0	0	0	0	0	0	0	0	0	0	0	0	0	0	0	0	0	0	0	0	0	0	0	0	0
Thalassiosira	0.973684	DQ514795	Thalassiosira	Thalassiosiraceae	Thalassiosirales	Mediophyceae	genus	['Thalassiosira sp. 11BOF', 'Thalassiosira minuscula', 'Thalassiosira antarctica', 'Thalassiosira sp. 1 SEH-2013', 'Thalassiosira angulata']	NA	35127	aaacattacagctgctacgatggaagaagtatacaaacgtgctgagtatgctaaagctattggttctgtagttgtt	17	0	0	0	0	0	0	0	0	0	0	0	0	0	0	0	17	0	0	0	0	0	0	0	0	0	0	0	0	0	0	0	0	0	0	0	0	0
Thalassiosira	0.921053	DQ514799	Thalassiosira	Thalassiosiraceae	Thalassiosirales	Mediophyceae	genus	['Thalassiosira sundarbana', 'Thalassiosira oceanica']	NA	35127	aaacattactgctgcgacgatggaagaagtatacaaacgtgctgagtatgctaaacaaattggttctattgttatt	16	0	0	0	0	0	0	0	0	0	0	0	0	0	0	0	0	0	0	0	0	0	0	0	0	16	0	0	0	0	0	0	0	0	0	0	0	0
Thalassiosira	0.948052	DQ514808	Thalassiosira	Thalassiosiraceae	Thalassiosirales	Mediophyceae	genus	['Thalassiosira sp. 11BOF', 'Thalassiosira sp. 1 SEH-2013']	NA	35127	aaacattacagctgcgacaatggaagaagtatacaaacgtgctgagtatgctaaatcagttggttctgtagttatt	16	0	0	0	0	0	0	0	0	0	0	0	0	0	0	0	0	0	0	0	0	0	0	0	0	0	0	0	0	0	0	16	0	0	0	0	0	0
Thalassiosira	0.973684	DQ514808	Thalassiosira	Thalassiosiraceae	Thalassiosirales	Mediophyceae	genus	['Thalassiosira sp. 11BOF', 'Thalassiosira sp. 1 SEH-2013']	NA	35127	aaacattacagctgcaacaatggaagaagtatacagacgtgctgagtatgctaaagctattggttctgtagttgtt	16	0	0	0	16	0	0	0	0	0	0	0	0	0	0	0	0	0	0	0	0	0	0	0	0	0	0	0	0	0	0	0	0	0	0	0	0	0
Thalassiosira	0.947368	DQ514808	Thalassiosira	Thalassiosiraceae	Thalassiosirales	Mediophyceae	genus	['Thalassiosira sp. 11BOF', 'Thalassiosira sp. 1 SEH-2013']	NA	35127	aaacattactgctgcgacaatggaagaagtatacaaacgtgctgagtatgctaaaactattaattctgtagttgtt	16	0	0	0	16	0	0	0	0	0	0	0	0	0	0	0	0	0	0	0	0	0	0	0	0	0	0	0	0	0	0	0	0	0	0	0	0	0
Thalassiosira	0.973684	DQ514808	Thalassiosira	Thalassiosiraceae	Thalassiosirales	Mediophyceae	genus	['Thalassiosira sp. 11BOF', 'Thalassiosira sp. 1 SEH-2013']	NA	35127	aaacgtaacagctgcgacaatggaagaagtatacaaacgtgctgagtatgctaaagctattggttctgtagttgtt	14	0	0	0	0	0	0	0	0	0	0	0	0	0	0	0	0	0	0	0	0	0	0	0	0	14	0	0	0	0	0	0	0	0	0	0	0	0
Thalassiosira	0.973684	DQ514808	Thalassiosira	Thalassiosiraceae	Thalassiosirales	Mediophyceae	genus	['Thalassiosira sp. 11BOF', 'Thalassiosira sp. 1 SEH-2013']	NA	35127	aaacattactgctgcgacaatggaagaagtatacaaacgtgctgagtatgctaaagcgattggttctgtagttgtt	13	0	0	0	0	0	0	0	0	0	0	0	0	0	0	0	0	0	0	0	0	0	0	0	0	0	0	0	0	0	0	0	0	0	0	13	0	0
Thalassiosira	0.986842	DQ514808	Thalassiosira	Thalassiosiraceae	Thalassiosirales	Mediophyceae	genus	[]	NA	35127	aaacataacagctgcgacaatggaagaagtatacaaacgtgctgagtatgctaaagctattggttctgtagttgtt	13	0	0	0	0	0	0	0	0	0	0	0	0	0	0	0	0	0	0	0	0	0	0	0	0	0	0	0	0	0	0	13	0	0	0	0	0	0
Thalassiosira	0.960526	DQ514808	Thalassiosira	Thalassiosiraceae	Thalassiosirales	Mediophyceae	genus	['Thalassiosira sp. 11BOF', 'Thalassiosira sp. 1 SEH-2013']	NA	35127	aaacattactgctgcgacaatggaagaagtatacaaacgtgctgagtatgctaaagccattggttccgtagttgtt	13	0	0	0	0	0	0	0	0	0	0	0	0	0	0	0	0	0	0	0	0	0	0	0	0	0	0	0	0	0	0	0	0	13	0	0	0	0
Thalassiosira	0.960526	DQ514808	Thalassiosira	Thalassiosiraceae	Thalassiosirales	Mediophyceae	genus	['Thalassiosira sp. 11BOF', 'Thalassiosira sp. 1 SEH-2013']	NA	35127	aaacattactgctgcgacaatggaagaagtatacaaacgtgctgagtatgccaaagctgttggttctgtagttgtt	12	0	0	0	0	0	0	0	0	0	0	0	0	0	0	0	0	12	0	0	0	0	0	0	0	0	0	0	0	0	0	0	0	0	0	0	0	0
Thalassiosira	0.947368	DQ514808	Thalassiosira	Thalassiosiraceae	Thalassiosirales	Mediophyceae	genus	['Thalassiosira sp. 11BOF', 'Thalassiosira sp. 1 SEH-2013']	NA	35127	aaacattactgctgcgacgatggaggaagtatacaaacgtgctgagtatgctaaagctattggctctgtagttgtt	12	0	0	0	0	0	0	0	0	0	0	0	0	0	0	0	0	0	0	0	12	0	0	0	0	0	0	0	0	0	0	0	0	0	0	0	0	0
Thalassiosira	0.934211	DQ514808	Thalassiosira	Thalassiosiraceae	Thalassiosirales	Mediophyceae	genus	['Thalassiosira sp. 11BOF', 'Thalassiosira sp. 1 SEH-2013']	NA	35127	aaacattactgctgcggtaatggaagaagtatacaaatgtgctgggtatgctaaagctattggttctgtagttgtt	12	0	0	0	12	0	0	0	0	0	0	0	0	0	0	0	0	0	0	0	0	0	0	0	0	0	0	0	0	0	0	0	0	0	0	0	0	0
Thalassiosira	0.947368	KC802088	Thalassiosira	Thalassiosiraceae	Thalassiosirales	Mediophyceae	genus	['Thalassiosira sundarbana', 'Thalassiosira sp. 10BOF']	NA	35127	aaacgtaacagctgcaacaatggaagaagtgtacaaacgtgctgagtacgctaaagctattggttctgtagttgtt	11	0	0	0	0	0	0	0	0	0	0	0	0	0	0	0	0	0	0	0	0	0	0	0	0	11	0	0	0	0	0	0	0	0	0	0	0	0
Thalassiosira	0.960526	DQ514808	Thalassiosira	Thalassiosiraceae	Thalassiosirales	Mediophyceae	genus	['Thalassiosira sp. 11BOF', 'Thalassiosira sp. 1 SEH-2013']	NA	35127	taacgttactgctgcgacaatggaagaagtatacaaacgtgctgagtatgctaaagctattggttctgtagttgtt	11	0	0	0	0	0	0	0	0	0	0	0	0	0	0	0	0	0	0	0	0	0	0	0	0	0	0	0	0	0	0	0	0	0	0	11	0	0
Thalassiosira	0.973684	DQ514808	Thalassiosira	Thalassiosiraceae	Thalassiosirales	Mediophyceae	genus	['Thalassiosira sp. 11BOF', 'Thalassiosira sp. 1 SEH-2013']	NA	35127	aaacattacagctgcgacaatggaagaagtatacaaacgtgctgagtatgctaaagctattggttctgttgttgta	11	0	0	11	0	0	0	0	0	0	0	0	0	0	0	0	0	0	0	0	0	0	0	0	0	0	0	0	0	0	0	0	0	0	0	0	0	0
Thalassiosira	0.973684	DQ514808	Thalassiosira	Thalassiosiraceae	Thalassiosirales	Mediophyceae	genus	['Thalassiosira sp. 11BOF', 'Thalassiosira sp. 1 SEH-2013']	NA	35127	aaacattaccgctgcgacaatggaagaagtatacaaacgtgctgagtatgctaaagctattggttctgtagttgct	11	0	0	0	0	0	0	0	0	0	0	0	0	0	0	0	0	0	0	0	0	0	0	0	0	0	0	0	0	0	0	0	0	0	0	0	0	11
Thalassiosira	0.960526	DQ514794	Thalassiosira	Thalassiosiraceae	Thalassiosirales	Mediophyceae	genus	['Thalassiosira antarctica']	NA	35127	aaacatcacagcggctactatggaagaagtatacaaacgtgctgagtatgctaaagctattggttctgttgttgta	10	0	0	0	0	0	0	0	0	0	0	0	10	0	0	0	0	0	0	0	0	0	0	0	0	0	0	0	0	0	0	0	0	0	0	0	0	0
Thalassiosira	0.947368	DQ514788	Thalassiosira	Thalassiosiraceae	Thalassiosirales	Mediophyceae	genus	['Thalassiosira angulata']	NA	35127	aaacatcacagctgctacgatggaagaaacgtacaaacgtgctgagtatgctaaagctattggttctgtagttgtt	10	0	0	0	0	0	0	0	0	0	0	0	0	0	0	0	10	0	0	0	0	0	0	0	0	0	0	0	0	0	0	0	0	0	0	0	0	0
Thalassiosira	0.922078	DQ514808	Thalassiosira	Thalassiosiraceae	Thalassiosirales	Mediophyceae	genus	['Thalassiosira sp. 11BOF', 'Thalassiosira sp. 1 SEH-2013']	NA	35127	aaacgttactgctgcgactatggaaaatgtttacaaacgtgctgagtatgctaaagctattggttctgtagttgtt	10	0	0	0	0	0	0	0	0	0	0	0	0	0	0	0	0	0	0	0	0	0	0	0	0	0	0	0	0	0	0	0	0	0	0	10	0	0
Thalassiosira	0.960526	DQ514808	Thalassiosira	Thalassiosiraceae	Thalassiosirales	Mediophyceae	genus	['Thalassiosira sp. 11BOF', 'Thalassiosira sp. 1 SEH-2013']	NA	35127	aaacattactgctgcgacaatggaagaagtatacaaacgtgctgagtatgccaaagttattggttctgtagttgtt	10	0	0	0	0	0	0	0	0	0	0	0	0	0	0	0	0	0	0	0	0	0	0	0	0	0	0	10	0	0	0	0	0	0	0	0	0	0
Thalassiosira	0.973684	DQ514808	Thalassiosira	Thalassiosiraceae	Thalassiosirales	Mediophyceae	genus	['Thalassiosira sp. 11BOF', 'Thalassiosira sp. 1 SEH-2013']	NA	35127	agacattacagctgcgacaatggaagaagtatacgaacgtgctgagtatgctaaagctattggttctgtagttgtt	10	0	0	0	0	0	0	0	0	0	0	0	0	0	0	0	0	0	10	0	0	0	0	0	0	0	0	0	0	0	0	0	0	0	0	0	0	0
Thalassiosira	0.973684	DQ514808	Thalassiosira	Thalassiosiraceae	Thalassiosirales	Mediophyceae	genus	['Thalassiosira sp. 11BOF', 'Thalassiosira sp. 1 SEH-2013']	NA	35127	aaacgttacagctgcgacaatggaagaagtatacaaacgtgctgagtatgctaaagccattggttctgtagttgtt	10	0	0	0	0	0	0	0	0	0	0	0	0	0	0	0	0	0	0	0	10	0	0	0	0	0	0	0	0	0	0	0	0	0	0	0	0	0
Thalassiosira angulata	1	KC985686	Thalassiosira	Thalassiosiraceae	Thalassiosirales	Mediophyceae	species	['Thalassiosira angulata']	Thalassiosira angulata	291033	aaacattacagctgctactatggaagaagtatacaaacgtgctgagtatgctaaagctattggttctatagttgtt	19498	0	224	0	808	77	75	138	43	2325	0	265	0	1231	0	0	0	0	0	0	0	0	6020	361	0	3262	162	3886	0	0	0	0	0	0	0	621	0	0
Thalassiosira angulata	0.986842	KC985686	Thalassiosira	Thalassiosiraceae	Thalassiosirales	Mediophyceae	species	['Thalassiosira angulata']	Thalassiosira angulata	291033	aaacattacagctgctactatggaagaagtatacaaacgtgctgagtatgctaaagctattggttctatagttgtc	98	0	0	0	0	0	0	0	0	0	0	0	0	0	0	0	0	0	0	0	0	0	98	0	0	0	0	0	0	0	0	0	0	0	0	0	0	0
Thalassiosira angulata	0.986842	KC985686	Thalassiosira	Thalassiosiraceae	Thalassiosirales	Mediophyceae	species	['Thalassiosira angulata']	Thalassiosira angulata	291033	aaacattacagctgttactatggaagaagtatacaaacgtgctgagtatgctaaagctattggttctatagttgtt	22	0	0	0	0	0	0	0	0	0	0	0	0	0	0	22	0	0	0	0	0	0	0	0	0	0	0	0	0	0	0	0	0	0	0	0	0	0
Thalassiosira angulata	0.986842	KC985686	Thalassiosira	Thalassiosiraceae	Thalassiosirales	Mediophyceae	species	['Thalassiosira angulata']	Thalassiosira angulata	291033	aaacattacagctgctactatggaagaagtatacaaacgtgctgagtatgctaaagctattggttctatcgttgtt	16	0	0	0	0	0	0	0	0	0	0	0	0	0	0	0	0	0	0	0	0	0	0	0	0	16	0	0	0	0	0	0	0	0	0	0	0	0
Thalassiosira anguste-lineata	1	KC985698	Thalassiosira	Thalassiosiraceae	Thalassiosirales	Mediophyceae	species	['Thalassiosira anguste-lineata']	Thalassiosira anguste-lineata	337180	aaacatcacagctgctacaatggaagaagtgtacaaacgtgctgaatacgcgaaagctattggttctatcgttgtt	81218	600	974	2088	4096	849	852	1496	3280	8508	33	348	379	467	0	115	618	229	1278	3660	5003	2670	15498	0	0	0	0	351	0	0	0	0	10180	0	2337	0	15309	0
Thalassiosira anguste-lineata	0.986842	KC985698	Thalassiosira	Thalassiosiraceae	Thalassiosirales	Mediophyceae	species	['Thalassiosira anguste-lineata']	Thalassiosira anguste-lineata	337180	aaacatcacagttgctacaatggaagaagtgtacaaacgtgctgaatacgcgaaagctattggttctatcgttgtt	185	0	0	0	0	0	0	136	0	0	0	0	0	0	49	0	0	0	0	0	0	0	0	0	0	0	0	0	0	0	0	0	0	0	0	0	0	0
Thalassiosira anguste-lineata	0.986842	KC985698	Thalassiosira	Thalassiosiraceae	Thalassiosirales	Mediophyceae	species	['Thalassiosira anguste-lineata']	Thalassiosira anguste-lineata	337180	aaacatcacagctgctacaatggaagaagtgtacaaacgtgctgaatacgcgaaagctattggttctatcgttgct	131	65	0	0	11	0	0	0	0	19	0	0	0	0	0	0	0	0	0	0	0	0	11	0	0	0	0	0	0	0	0	0	13	0	0	0	12	0
Thalassiosira anguste-lineata	0.973684	KC985698	Thalassiosira	Thalassiosiraceae	Thalassiosirales	Mediophyceae	species	['Thalassiosira anguste-lineata']	Thalassiosira anguste-lineata	337180	aaacatcacagctgctacaatggaagaagtgtacaaacgtgctgaatacgcgaaagctattggttctgtagttgtt	111	0	10	13	0	13	0	0	0	0	0	0	0	0	0	0	14	0	0	32	0	29	0	0	0	0	0	0	0	0	0	0	0	0	0	0	0	0
Thalassiosira anguste-lineata	0.986842	KC985698	Thalassiosira	Thalassiosiraceae	Thalassiosirales	Mediophyceae	species	['Thalassiosira anguste-lineata']	Thalassiosira anguste-lineata	337180	aaacatcacagctgctacaatgggagaagtgtacaaacgtgctgaatacgcgaaagctattggttctatcgttgtt	90	0	0	0	11	0	0	0	0	13	0	0	0	0	0	0	0	0	0	0	0	0	41	0	0	0	0	0	0	0	0	0	0	0	0	0	25	0
Thalassiosira anguste-lineata	0.986842	KC985698	Thalassiosira	Thalassiosiraceae	Thalassiosirales	Mediophyceae	species	['Thalassiosira anguste-lineata']	Thalassiosira anguste-lineata	337180	aaacaccacagctgctacaatggaagaagtgtacaaacgtgctgaatacgcgaaagctattggttctatcgttgtt	80	0	0	0	0	0	0	0	0	14	0	0	0	0	0	0	0	0	0	0	0	10	13	0	0	0	0	0	0	0	0	0	26	0	0	0	17	0
Thalassiosira anguste-lineata	0.973684	KC985698	Thalassiosira	Thalassiosiraceae	Thalassiosirales	Mediophyceae	species	['Thalassiosira anguste-lineata']	Thalassiosira anguste-lineata	337180	aaacatcacagctgttgcaatggaagaagtgtacaaacgtgctgaatacgcgaaagctattggttctatcgttgtt	60	0	0	0	0	0	0	0	0	0	0	0	0	60	0	0	0	0	0	0	0	0	0	0	0	0	0	0	0	0	0	0	0	0	0	0	0	0
Thalassiosira anguste-lineata	0.986842	KC985698	Thalassiosira	Thalassiosiraceae	Thalassiosirales	Mediophyceae	species	['Thalassiosira anguste-lineata']	Thalassiosira anguste-lineata	337180	aaacatcacagctgctacaatggaagaagtgtacaaacgtgctgaatacgcgaaagctattggttctatcgttgtg	49	0	0	0	0	0	0	0	0	0	0	0	0	0	0	0	0	0	0	0	0	0	49	0	0	0	0	0	0	0	0	0	0	0	0	0	0	0
Thalassiosira anguste-lineata	0.986842	KC985698	Thalassiosira	Thalassiosiraceae	Thalassiosirales	Mediophyceae	species	['Thalassiosira anguste-lineata']	Thalassiosira anguste-lineata	337180	aaacatcacagctgctataatggaagaagtgtacaaacgtgctgaatacgcgaaagctattggttctatcgttgtt	41	41	0	0	0	0	0	0	0	0	0	0	0	0	0	0	0	0	0	0	0	0	0	0	0	0	0	0	0	0	0	0	0	0	0	0	0	0
Thalassiosira anguste-lineata	0.973684	KC985698	Thalassiosira	Thalassiosiraceae	Thalassiosirales	Mediophyceae	species	['Thalassiosira anguste-lineata']	Thalassiosira anguste-lineata	337180	aaacgttacagctgctacaatggaagaagtgtacaaacgtgctgaatacgcgaaagctattggttctatcgttgtt	37	0	0	0	0	0	0	0	14	13	0	0	0	0	0	0	0	0	0	0	0	10	0	0	0	0	0	0	0	0	0	0	0	0	0	0	0	0
Thalassiosira anguste-lineata	0.960526	KC985698	Thalassiosira	Thalassiosiraceae	Thalassiosirales	Mediophyceae	species	['Thalassiosira anguste-lineata']	Thalassiosira anguste-lineata	337180	aaacatcacagctgctacaatggaaaaaatgtacaaacgtgctaaatacgcgaaagctattggttctatcgttgtt	26	0	0	0	0	0	26	0	0	0	0	0	0	0	0	0	0	0	0	0	0	0	0	0	0	0	0	0	0	0	0	0	0	0	0	0	0	0
Thalassiosira anguste-lineata	0.986842	KC985698	Thalassiosira	Thalassiosiraceae	Thalassiosirales	Mediophyceae	species	['Thalassiosira anguste-lineata']	Thalassiosira anguste-lineata	337180	aaacatcacagctgctacaatggaagaagtgtataaacgtgctgaatacgcgaaagctattggttctatcgttgtt	20	0	0	0	0	0	0	0	20	0	0	0	0	0	0	0	0	0	0	0	0	0	0	0	0	0	0	0	0	0	0	0	0	0	0	0	0	0
Thalassiosira anguste-lineata	0.973684	KC985698	Thalassiosira	Thalassiosiraceae	Thalassiosirales	Mediophyceae	species	['Thalassiosira anguste-lineata']	Thalassiosira anguste-lineata	337180	aaacattacagctgcgacaatggaagaagtgtacaaacgtgctgaatacgcgaaagctattggttctatcgttgtt	16	0	0	0	0	0	0	0	0	0	0	0	0	0	0	0	0	0	0	16	0	0	0	0	0	0	0	0	0	0	0	0	0	0	0	0	0	0
Thalassiosira anguste-lineata	0.986842	KC985698	Thalassiosira	Thalassiosiraceae	Thalassiosirales	Mediophyceae	species	['Thalassiosira anguste-lineata']	Thalassiosira anguste-lineata	337180	aaacatcacagctgctacaatggaagaagtgtacaaacgtgctgaatacgcgaaagctattggttctatcattgtt	14	0	0	0	0	0	0	0	0	0	0	0	0	0	0	0	0	14	0	0	0	0	0	0	0	0	0	0	0	0	0	0	0	0	0	0	0	0
Thalassiosira anguste-lineata	0.960526	KC985698	Thalassiosira	Thalassiosiraceae	Thalassiosirales	Mediophyceae	species	['Thalassiosira anguste-lineata']	Thalassiosira anguste-lineata	337180	aaacattactgctgcgacaatggaagaagtgtacaaacgtgctgaatacgcgaaagctattggttctatcgttgtt	13	0	0	0	0	0	0	0	0	0	0	0	0	0	0	0	13	0	0	0	0	0	0	0	0	0	0	0	0	0	0	0	0	0	0	0	0	0
Thalassiosira anguste-lineata	0.960526	KC985698	Thalassiosira	Thalassiosiraceae	Thalassiosirales	Mediophyceae	species	['Thalassiosira anguste-lineata']	Thalassiosira anguste-lineata	337180	aaacattacagctgcgacaatggaagaagtatacaaacgtgctgaatacgcgaaagctattggttctatcgttgtt	10	0	0	0	0	0	0	0	0	0	0	0	0	0	0	0	0	0	0	10	0	0	0	0	0	0	0	0	0	0	0	0	0	0	0	0	0	0
Thalassiosira anguste-lineata	0.973684	KC985698	Thalassiosira	Thalassiosiraceae	Thalassiosirales	Mediophyceae	species	['Thalassiosira anguste-lineata']	Thalassiosira anguste-lineata	337180	aaacatcacagctgctacagtggaagaagtgtacaaacgtgctgagtacgcgaaagctattggttctatcgttgtt	10	0	0	0	0	0	0	0	10	0	0	0	0	0	0	0	0	0	0	0	0	0	0	0	0	0	0	0	0	0	0	0	0	0	0	0	0	0
Thalassiosira antarctica	0.986842	DQ514795	Thalassiosira	Thalassiosiraceae	Thalassiosirales	Mediophyceae	species	['Thalassiosira antarctica']	Thalassiosira antarctica	160265	aaacatcacagcggctactatggaagaagtatacaaacgtgctgagtatgctaaagctattggttctgtagttgtt	289277	2582	3081	7163	13883	3616	4540	3094	4320	5199	961	8397	5138	13054	3922	11198	5560	4369	14317	6306	20081	5207	26429	5600	13647	5950	2909	16581	6080	16575	7258	9089	0	20828	0	4048	0	8295
Thalassiosira antarctica	1	DQ514795	Thalassiosira	Thalassiosiraceae	Thalassiosirales	Mediophyceae	species	['Thalassiosira antarctica']	Thalassiosira antarctica	160265	aaacatcacagctgctactatggaagaagtatacaaacgtgctgagtatgctaaagctattggttctgtagttgtt	176356	3010	2616	5584	15522	3052	4213	664	1409	904	2970	12639	7092	10730	13481	17735	46	0	7896	2122	9217	2094	13740	131	15	0	2369	11798	0	16	302	11	2993	16654	164	0	5167	0
Thalassiosira antarctica	1	KC985723	Thalassiosira	Thalassiosiraceae	Thalassiosirales	Mediophyceae	species	['Thalassiosira antarctica']	Thalassiosira antarctica	160265	aaacattacagcggctacaatggaagaagtatacaaacgtgctgagtatgctaaagctattggttctatcgttgtt	28225	0	0	0	0	0	0	0	0	0	0	0	0	0	0	0	0	0	0	0	0	0	0	0	0	0	0	0	0	28225	0	0	0	0	0	0	0	0
Thalassiosira antarctica	0.973684	DQ514795	Thalassiosira	Thalassiosiraceae	Thalassiosirales	Mediophyceae	species	['Thalassiosira antarctica']	Thalassiosira antarctica	160265	aaacatcacaacggctactatggaagaagtatacaaacgtgctgagtatgctaaagctattggttctgtagttgtt	6176	0	0	0	0	0	0	0	0	1261	0	0	0	0	0	0	0	0	0	0	0	0	0	0	0	0	0	0	0	0	0	0	0	0	4915	0	0	0
Thalassiosira antarctica	0.986842	KC985723	Thalassiosira	Thalassiosiraceae	Thalassiosirales	Mediophyceae	species	['Thalassiosira antarctica']	Thalassiosira antarctica	160265	aaacattacagcggctacaatggaagaagtatacaaacgtgctgagtatgctaaagctattggttctatcgttgta	4236	0	0	0	0	0	0	0	0	0	0	0	0	0	0	0	0	0	0	0	0	0	0	0	0	0	0	0	0	4236	0	0	0	0	0	0	0	0
Thalassiosira antarctica	0.973684	DQ514795	Thalassiosira	Thalassiosiraceae	Thalassiosirales	Mediophyceae	species	['Thalassiosira antarctica']	Thalassiosira antarctica	160265	aaacatcacagcggctactatggaagaagtatacaaacgtgctaagtatgctaaagctattggttctgtagttgtt	1289	0	0	0	0	0	41	0	0	0	0	1205	0	0	0	0	0	0	0	0	0	0	12	31	0	0	0	0	0	0	0	0	0	0	0	0	0	0
Thalassiosira antarctica	0.973684	DQ514795	Thalassiosira	Thalassiosiraceae	Thalassiosirales	Mediophyceae	species	['Thalassiosira antarctica']	Thalassiosira antarctica	160265	aaacatcacagcggctactatggaagaagtatacaaacgcgctgagtatgctaaagctattggttctgtagttgtt	1158	0	0	0	15	0	0	12	0	0	0	0	12	19	0	22	13	0	11	24	24	11	59	0	40	10	0	20	0	29	0	803	0	24	0	10	0	0
Thalassiosira antarctica	0.986842	DQ514795	Thalassiosira	Thalassiosiraceae	Thalassiosirales	Mediophyceae	species	['Thalassiosira antarctica']	Thalassiosira antarctica	160265	aaacatcacagctgctactatggaagaagtatacaaacgtactgagtatgctaaagctattggttctgtagttgtt	1112	0	0	1112	0	0	0	0	0	0	0	0	0	0	0	0	0	0	0	0	0	0	0	0	0	0	0	0	0	0	0	0	0	0	0	0	0	0
Thalassiosira antarctica	0.973684	DQ514795	Thalassiosira	Thalassiosiraceae	Thalassiosirales	Mediophyceae	species	['Thalassiosira antarctica']	Thalassiosira antarctica	160265	aaacatcacagcggctattatggaagaagtatacaaacgtgctgagtatgctaaagctattggttctgtagttgtt	1109	0	0	0	0	0	0	0	0	0	0	0	0	508	601	0	0	0	0	0	0	0	0	0	0	0	0	0	0	0	0	0	0	0	0	0	0	0
Thalassiosira antarctica	0.986842	DQ514795	Thalassiosira	Thalassiosiraceae	Thalassiosirales	Mediophyceae	species	['Thalassiosira antarctica']	Thalassiosira antarctica	160265	aaacatcacagctgctactatggaagaagtatacaaacgtgctgagtatgttaaagctattggttctgtagttgtt	917	0	0	0	31	12	0	0	0	0	0	69	0	0	15	10	0	0	0	0	780	0	0	0	0	0	0	0	0	0	0	0	0	0	0	0	0	0
Thalassiosira antarctica	0.973684	DQ514795	Thalassiosira	Thalassiosiraceae	Thalassiosirales	Mediophyceae	species	['Thalassiosira antarctica']	Thalassiosira antarctica	160265	aaacatcatagcggctactatggaagaagtatacaaacgtgctgagtatgctaaagctattggttctgtagttgtt	887	0	0	12	27	0	20	0	0	0	0	0	0	0	0	818	0	0	0	0	0	0	10	0	0	0	0	0	0	0	0	0	0	0	0	0	0	0
Thalassiosira antarctica	0.986842	DQ514795	Thalassiosira	Thalassiosiraceae	Thalassiosirales	Mediophyceae	species	['Thalassiosira antarctica']	Thalassiosira antarctica	160265	aaacatcacagctgctactatggaagaagtatacaaacgtgctgagtatgctaaagctattggttttgtagttgtt	861	31	0	0	0	0	0	0	0	0	0	0	0	0	0	0	0	0	0	830	0	0	0	0	0	0	0	0	0	0	0	0	0	0	0	0	0	0
Thalassiosira antarctica	0.973684	DQ514795	Thalassiosira	Thalassiosiraceae	Thalassiosirales	Mediophyceae	species	['Thalassiosira antarctica']	Thalassiosira antarctica	160265	aaacaccacagcggctactatggaagaagtatacaaacgtgctgagtatgctaaagctattggttctgtagttgtt	844	0	0	0	12	0	12	0	0	0	0	0	12	20	0	0	12	0	17	576	40	0	46	12	18	10	0	16	0	13	0	0	0	18	0	0	0	10
Thalassiosira antarctica	0.986842	DQ514795	Thalassiosira	Thalassiosiraceae	Thalassiosirales	Mediophyceae	species	['Thalassiosira antarctica']	Thalassiosira antarctica	160265	aaacatcacagctgctactatggaagaagtatataaacgtgctgagtatgctaaagctattggttctgtagttgtt	609	0	0	364	0	0	0	0	0	0	0	229	0	0	0	16	0	0	0	0	0	0	0	0	0	0	0	0	0	0	0	0	0	0	0	0	0	0
Thalassiosira antarctica	0.986842	DQ514795	Thalassiosira	Thalassiosiraceae	Thalassiosirales	Mediophyceae	species	['Thalassiosira antarctica']	Thalassiosira antarctica	160265	aaacatcacagctgttactatggaagaagtatacaaacgtgctgagtatgctaaagctattggttctgtagttgtt	556	0	0	0	12	0	0	0	0	0	0	0	0	0	0	0	0	0	0	0	10	0	0	0	0	0	0	534	0	0	0	0	0	0	0	0	0	0
Thalassiosira antarctica	0.986842	DQ514795	Thalassiosira	Thalassiosiraceae	Thalassiosirales	Mediophyceae	species	['Thalassiosira antarctica']	Thalassiosira antarctica	160265	aaacatcacagctgctactatggaagaagtatacaaacgtgctgagtatgctaaagctactggttctgtagttgtt	492	0	0	0	18	0	0	0	0	0	0	17	0	0	12	15	0	0	23	0	341	0	10	0	0	0	0	16	0	0	0	0	0	40	0	0	0	0
Thalassiosira antarctica	0.973684	DQ514795	Thalassiosira	Thalassiosiraceae	Thalassiosirales	Mediophyceae	species	['Thalassiosira antarctica']	Thalassiosira antarctica	160265	aaacatcacagcggctactatggaagaagtatacaaacgtgctgagtatgctaaagctattggctctgtagttgtt	491	0	0	18	27	12	10	0	0	11	0	17	0	15	0	21	17	14	22	10	40	12	43	0	27	10	10	43	10	33	13	16	0	30	0	0	0	10
Thalassiosira antarctica	0.973684	DQ514795	Thalassiosira	Thalassiosiraceae	Thalassiosirales	Mediophyceae	species	['Thalassiosira antarctica']	Thalassiosira antarctica	160265	aaacatcacagcggttactatggaagaagtatacaaacgtgctgagtatgctaaagctattggttctgtagttgtt	429	0	0	0	0	0	0	0	0	0	0	0	0	0	0	0	0	0	418	0	0	0	0	0	0	0	0	0	0	11	0	0	0	0	0	0	0	0
Thalassiosira antarctica	0.960526	DQ514795	Thalassiosira	Thalassiosiraceae	Thalassiosirales	Mediophyceae	species	['Thalassiosira antarctica']	Thalassiosira antarctica	160265	aaacatcacagcggctactataaaagaagtatacaaacgtgctgagtatgctaaagctattggttctgtagttgtt	415	0	0	415	0	0	0	0	0	0	0	0	0	0	0	0	0	0	0	0	0	0	0	0	0	0	0	0	0	0	0	0	0	0	0	0	0	0
Thalassiosira antarctica	0.986842	DQ514795	Thalassiosira	Thalassiosiraceae	Thalassiosirales	Mediophyceae	species	['Thalassiosira antarctica']	Thalassiosira antarctica	160265	aaacatcacagctgctactatggaagaagtatacaaacgtgctgagtatgctaaagctattggttctgtagttgta	315	10	0	14	19	0	15	0	0	0	14	33	41	92	26	39	0	0	0	0	0	0	12	0	0	0	0	0	0	0	0	0	0	0	0	0	0	0
Thalassiosira antarctica	0.973684	DQ514795	Thalassiosira	Thalassiosiraceae	Thalassiosirales	Mediophyceae	species	['Thalassiosira antarctica']	Thalassiosira antarctica	160265	aaacatcacagcggccactatggaagaagtatacaaacgtgctgagtatgctaaagctattggttctgtagttgtt	268	0	0	12	0	0	0	0	0	0	0	0	0	94	0	0	0	0	16	0	22	0	27	11	28	0	0	12	0	20	0	15	0	11	0	0	0	0
Thalassiosira antarctica	0.986842	DQ514795	Thalassiosira	Thalassiosiraceae	Thalassiosirales	Mediophyceae	species	['Thalassiosira antarctica']	Thalassiosira antarctica	160265	aaacatcacagctgctactatggaagaggtatacaaacgtgctgagtatgctaaagctattggttctgtagttgtt	236	0	11	0	24	10	10	0	0	0	0	15	14	31	25	26	0	0	0	0	0	0	10	0	0	0	0	32	0	0	0	0	0	28	0	0	0	0
Thalassiosira antarctica	0.973684	DQ514795	Thalassiosira	Thalassiosiraceae	Thalassiosirales	Mediophyceae	species	['Thalassiosira antarctica']	Thalassiosira antarctica	160265	aaacatcacagcggctactacggaagaagtatacaaacgtgctgagtatgctaaagctattggttctgtagttgtt	232	0	0	10	30	0	0	0	0	0	0	0	0	11	0	0	0	0	14	0	46	10	34	0	24	0	0	19	0	13	0	0	0	21	0	0	0	0
Thalassiosira antarctica	0.973684	DQ514795	Thalassiosira	Thalassiosiraceae	Thalassiosirales	Mediophyceae	species	['Thalassiosira antarctica']	Thalassiosira antarctica	160265	aaacatcacagcggctgctatggaagaagtatacaaacgtgctgagtatgctaaagctattggttctgtagttgtt	218	0	0	0	11	0	0	0	0	0	0	0	10	0	0	18	0	0	49	12	19	16	26	0	18	0	0	12	0	17	0	0	0	10	0	0	0	0
Thalassiosira antarctica	0.986842	DQ514795	Thalassiosira	Thalassiosiraceae	Thalassiosirales	Mediophyceae	species	['Thalassiosira antarctica']	Thalassiosira antarctica	160265	aaacatcacagctgctactatggaagaaatatacaaacgtgctgagtatgctaaagctattggttctgtagttgtt	214	129	0	0	0	0	0	85	0	0	0	0	0	0	0	0	0	0	0	0	0	0	0	0	0	0	0	0	0	0	0	0	0	0	0	0	0	0
Thalassiosira antarctica	0.986842	DQ514795	Thalassiosira	Thalassiosiraceae	Thalassiosirales	Mediophyceae	species	['Thalassiosira antarctica']	Thalassiosira antarctica	160265	aaacatcacagctgctactacggaagaagtatacaaacgtgctgagtatgctaaagctattggttctgtagttgtt	178	0	0	11	13	0	0	0	0	0	0	16	11	13	23	26	0	0	0	0	14	0	11	0	0	0	0	11	0	0	0	0	0	29	0	0	0	0
Thalassiosira antarctica	0.973684	DQ514795	Thalassiosira	Thalassiosiraceae	Thalassiosirales	Mediophyceae	species	['Thalassiosira antarctica']	Thalassiosira antarctica	160265	aaacatcacagcggctactatggaagaagtatacaaacgtgctgagtatgctaaagctattagttctgtagttgtt	164	0	0	0	144	0	0	0	0	0	0	0	0	0	0	0	0	0	0	0	0	0	10	0	0	0	0	0	0	0	0	0	0	10	0	0	0	0
Thalassiosira antarctica	0.986842	DQ514795	Thalassiosira	Thalassiosiraceae	Thalassiosirales	Mediophyceae	species	['Thalassiosira antarctica']	Thalassiosira antarctica	160265	aaacatcacagctgctactatggaaggagtatacaaacgtgctgagtatgctaaagctattggttctgtagttgtt	134	0	0	0	0	0	0	0	0	0	0	13	16	13	22	15	0	0	0	0	12	0	13	0	0	0	0	14	0	0	0	0	0	16	0	0	0	0
Thalassiosira antarctica	0.973684	DQ514795	Thalassiosira	Thalassiosiraceae	Thalassiosirales	Mediophyceae	species	['Thalassiosira antarctica']	Thalassiosira antarctica	160265	aaacatcacagcggctactatggaaaaagtatacaaacgtgctgagtatgctaaagctattggttctgtagttgtt	88	0	0	0	76	0	0	0	0	0	0	0	0	0	0	0	0	0	0	0	0	0	0	0	0	0	0	0	12	0	0	0	0	0	0	0	0	0
Thalassiosira antarctica	0.986842	DQ514795	Thalassiosira	Thalassiosiraceae	Thalassiosirales	Mediophyceae	species	['Thalassiosira antarctica']	Thalassiosira antarctica	160265	aaacatcacagctgctactatagaagaagtatacaaacgtgctgagtatgctaaagctattggttctgtagttgtt	76	0	17	0	19	0	0	0	0	0	0	0	0	10	18	0	0	0	0	0	12	0	0	0	0	0	0	0	0	0	0	0	0	0	0	0	0	0
Thalassiosira antarctica	0.960526	DQ514795	Thalassiosira	Thalassiosiraceae	Thalassiosirales	Mediophyceae	species	['Thalassiosira antarctica']	Thalassiosira antarctica	160265	aaacatcacagctgctactataaaaaaagtatacaaacgtgctgagtatgctaaagctattggttctgtagttgtt	72	0	0	0	0	0	72	0	0	0	0	0	0	0	0	0	0	0	0	0	0	0	0	0	0	0	0	0	0	0	0	0	0	0	0	0	0	0
Thalassiosira antarctica	0.960526	DQ514795	Thalassiosira	Thalassiosiraceae	Thalassiosirales	Mediophyceae	species	['Thalassiosira antarctica']	Thalassiosira antarctica	160265	aaacatcacagctgttactatggaagaagtatataaatgtgctgagtatgctaaagctattggttctgtagttgtt	72	0	0	0	0	72	0	0	0	0	0	0	0	0	0	0	0	0	0	0	0	0	0	0	0	0	0	0	0	0	0	0	0	0	0	0	0	0
Thalassiosira antarctica	0.973684	DQ514795	Thalassiosira	Thalassiosiraceae	Thalassiosirales	Mediophyceae	species	['Thalassiosira antarctica']	Thalassiosira antarctica	160265	aaacataacagcggctactatggaagaagtatacaaacgtgctgagtatgctaaagctattggttctgtagttgtt	68	0	0	0	0	0	0	0	0	0	0	0	0	0	0	0	0	0	0	0	15	0	14	0	12	0	0	11	0	0	0	0	0	16	0	0	0	0
Thalassiosira antarctica	0.973684	DQ514795	Thalassiosira	Thalassiosiraceae	Thalassiosirales	Mediophyceae	species	['Thalassiosira antarctica']	Thalassiosira antarctica	160265	aaacatcacagcggctactatggaagaagtatacaaacgtgctgagtatgctaaagctattggttctgtagttatt	61	17	0	0	11	0	0	0	0	0	0	0	0	0	0	0	0	0	20	0	0	0	13	0	0	0	0	0	0	0	0	0	0	0	0	0	0	0
Thalassiosira antarctica	0.922078	DQ514795	Thalassiosira	Thalassiosiraceae	Thalassiosirales	Mediophyceae	species	['Thalassiosira antarctica']	Thalassiosira antarctica	160265	aaacatcaccggcgcaactatggaagatgtatacgaacgtgctgagtatgctaaagctattggttctgtagttgtt	61	0	0	0	0	0	0	0	0	0	0	0	0	0	16	0	0	0	0	18	0	14	0	0	13	0	0	0	0	0	0	0	0	0	0	0	0	0
Thalassiosira antarctica	0.986842	DQ514795	Thalassiosira	Thalassiosiraceae	Thalassiosirales	Mediophyceae	species	['Thalassiosira antarctica']	Thalassiosira antarctica	160265	aaacgtcacagctgctactatggaagaagtatacaaacgtgctgagtatgctaaagctattggttctgtagttgtt	59	0	0	0	10	0	0	0	0	0	0	0	10	12	10	17	0	0	0	0	0	0	0	0	0	0	0	0	0	0	0	0	0	0	0	0	0	0
Thalassiosira antarctica	0.960526	DQ514795	Thalassiosira	Thalassiosiraceae	Thalassiosirales	Mediophyceae	species	['Thalassiosira antarctica']	Thalassiosira antarctica	160265	aaacatcacagcggctactatggaaaaaatatacaaacgtgctgagtatgctaaagctattggttctgtagttgtt	59	0	0	0	0	0	0	59	0	0	0	0	0	0	0	0	0	0	0	0	0	0	0	0	0	0	0	0	0	0	0	0	0	0	0	0	0	0
Thalassiosira antarctica	0.974026	DQ514795	Thalassiosira	Thalassiosiraceae	Thalassiosirales	Mediophyceae	species	['Thalassiosira antarctica']	Thalassiosira antarctica	160265	aaacatcacagtggctactatggaagaagtatacaaacgtgctgagtatgctaaagctattggttctgtagttgtt	55	17	0	0	0	0	0	0	0	0	0	0	0	0	0	0	0	0	0	0	12	0	14	0	0	0	0	0	12	0	0	0	0	0	0	0	0	0
Thalassiosira antarctica	0.986842	DQ514795	Thalassiosira	Thalassiosiraceae	Thalassiosirales	Mediophyceae	species	['Thalassiosira antarctica']	Thalassiosira antarctica	160265	aaacatcacagctgctactatggaagaagtatacaaacgtgctgagtatactaaagctattggttctgtagttgtt	50	0	0	0	10	0	0	0	0	0	0	0	0	0	0	0	0	0	0	0	40	0	0	0	0	0	0	0	0	0	0	0	0	0	0	0	0	0
Thalassiosira antarctica	0.986842	DQ514795	Thalassiosira	Thalassiosiraceae	Thalassiosirales	Mediophyceae	species	['Thalassiosira antarctica']	Thalassiosira antarctica	160265	aaacatcacagctgctactatggaagaagtatacaaacgtgctgagtatgctaaagctgttggttctgtagttgtt	45	0	0	0	13	0	0	0	0	0	0	0	0	11	11	0	0	0	0	0	0	0	10	0	0	0	0	0	0	0	0	0	0	0	0	0	0	0
Thalassiosira antarctica	0.986842	KC985723	Thalassiosira	Thalassiosiraceae	Thalassiosirales	Mediophyceae	species	['Thalassiosira antarctica']	Thalassiosira antarctica	160265	aaacattacagcggctacaatggaagaagtatacaaacgtgctgagtatgctaaagctattggttctatcgtcgtt	40	0	0	0	0	0	0	0	0	0	0	0	0	0	0	0	0	0	0	0	0	0	0	0	0	0	0	0	0	40	0	0	0	0	0	0	0	0
Thalassiosira antarctica	0.986842	DQ514795	Thalassiosira	Thalassiosiraceae	Thalassiosirales	Mediophyceae	species	['Thalassiosira antarctica']	Thalassiosira antarctica	160265	aaacataacagctgctactatggaagaagtatacaaacgtgctgagtatgctaaagctattggttctgtagttgtt	40	0	0	0	11	0	0	0	0	0	0	0	0	0	0	0	0	0	0	0	0	0	17	0	0	0	0	0	0	0	0	0	0	12	0	0	0	0
Thalassiosira antarctica	0.973684	DQ514795	Thalassiosira	Thalassiosiraceae	Thalassiosirales	Mediophyceae	species	['Thalassiosira antarctica']	Thalassiosira antarctica	160265	aaacatcatagctgctactatggaagaagtatacaaacgtgctgagtatgctaaagttattggttctgtagttgtt	32	0	0	0	0	0	0	0	0	0	0	0	0	0	0	32	0	0	0	0	0	0	0	0	0	0	0	0	0	0	0	0	0	0	0	0	0	0
Thalassiosira antarctica	0.973684	DQ514795	Thalassiosira	Thalassiosiraceae	Thalassiosirales	Mediophyceae	species	['Thalassiosira antarctica']	Thalassiosira antarctica	160265	aaacatcacagcggctactatggaagaagtatacaaacgttctgagtatgctaaagctattggttctgtagttgtt	30	0	0	0	0	0	0	0	0	0	0	0	0	0	0	0	0	0	0	0	13	0	17	0	0	0	0	0	0	0	0	0	0	0	0	0	0	0
Thalassiosira antarctica	0.986842	DQ514795	Thalassiosira	Thalassiosiraceae	Thalassiosirales	Mediophyceae	species	['Thalassiosira antarctica']	Thalassiosira antarctica	160265	aaacatcacagctgctactatggaagaagtatacaaacgtgctgagtatgctaaagcttttggttctgtagttgtt	28	0	0	0	14	0	0	0	0	0	0	0	0	0	14	0	0	0	0	0	0	0	0	0	0	0	0	0	0	0	0	0	0	0	0	0	0	0
Thalassiosira antarctica	0.960526	DQ514795	Thalassiosira	Thalassiosiraceae	Thalassiosirales	Mediophyceae	species	['Thalassiosira antarctica']	Thalassiosira antarctica	160265	aaacatcatagttgttactatggaagaagtatacaaacgtgctgagtatgctaaagctattggttctgtagttgtt	27	0	0	0	0	0	27	0	0	0	0	0	0	0	0	0	0	0	0	0	0	0	0	0	0	0	0	0	0	0	0	0	0	0	0	0	0	0
Thalassiosira antarctica	0.986842	KC985723	Thalassiosira	Thalassiosiraceae	Thalassiosirales	Mediophyceae	species	['Thalassiosira antarctica']	Thalassiosira antarctica	160265	aaacattacagcggctacaatggaagaagtatacaaacgtgctgagtatgctaaagctattggttctatagttgtt	25	0	0	0	0	0	0	0	0	0	0	0	0	0	0	0	0	0	0	0	0	0	0	0	0	0	0	0	0	25	0	0	0	0	0	0	0	0
Thalassiosira antarctica	0.960526	DQ514795	Thalassiosira	Thalassiosiraceae	Thalassiosirales	Mediophyceae	species	['Thalassiosira antarctica']	Thalassiosira antarctica	160265	aagcatcacagcggctactatggaagaagtatacaaacgtgctgagtatgctaaagctattggttctgtagttgtc	24	0	0	0	0	0	0	0	0	0	0	0	0	0	0	0	0	0	0	0	0	0	0	0	0	0	0	0	0	0	0	0	0	0	0	24	0	0
Thalassiosira antarctica	0.986842	KC985723	Thalassiosira	Thalassiosiraceae	Thalassiosirales	Mediophyceae	species	['Thalassiosira antarctica']	Thalassiosira antarctica	160265	aaacattacagcagctacaatggaagaagtatacaaacgtgctgagtatgctaaagctattggttctatcgttgtt	21	0	0	0	0	0	0	0	0	0	0	0	0	0	0	0	0	0	0	0	0	0	0	0	0	0	0	0	0	21	0	0	0	0	0	0	0	0
Thalassiosira antarctica	0.986842	DQ514795	Thalassiosira	Thalassiosiraceae	Thalassiosirales	Mediophyceae	species	['Thalassiosira antarctica']	Thalassiosira antarctica	160265	aaacatcacagctgctactatggaagaagtatacaaacgttctgagtatgctaaagctattggttctgtagttgtt	20	0	0	0	0	0	0	0	0	0	0	10	0	0	0	0	0	0	0	0	0	0	0	0	0	0	0	0	0	0	0	0	0	10	0	0	0	0
Thalassiosira antarctica	0.948052	DQ514795	Thalassiosira	Thalassiosiraceae	Thalassiosirales	Mediophyceae	species	['Thalassiosira antarctica']	Thalassiosira antarctica	160265	aaacatcaccggcgcaactatggaagaagtatacaaacgtgctgagtatgctaaagctattggttctgtagttgtt	19	0	0	0	0	0	0	0	0	0	0	0	0	0	0	0	0	0	0	19	0	0	0	0	0	0	0	0	0	0	0	0	0	0	0	0	0	0
Thalassiosira antarctica	0.960526	DQ514795	Thalassiosira	Thalassiosiraceae	Thalassiosirales	Mediophyceae	species	['Thalassiosira antarctica']	Thalassiosira antarctica	160265	aaacatcacagcggctactatggaagaagtatacaaacgcgctgagtatgctaaagctattggctctgtagttgtt	17	0	0	0	0	0	0	0	0	0	0	0	0	0	0	0	0	0	0	0	0	0	0	0	0	0	0	0	0	0	0	17	0	0	0	0	0	0
Thalassiosira antarctica	0.960526	DQ514795	Thalassiosira	Thalassiosiraceae	Thalassiosirales	Mediophyceae	species	['Thalassiosira antarctica']	Thalassiosira antarctica	160265	aaacatcacagcggctactatggaagaagtatacaaacgtgctgagtatgctaaagctattggttctgtagttatc	14	0	0	0	0	0	0	0	0	0	0	0	0	14	0	0	0	0	0	0	0	0	0	0	0	0	0	0	0	0	0	0	0	0	0	0	0	0
Thalassiosira antarctica	0.961039	DQ514795	Thalassiosira	Thalassiosiraceae	Thalassiosirales	Mediophyceae	species	['Thalassiosira antarctica']	Thalassiosira antarctica	160265	aaacatcacagtggctactatggaagaagtatacaaacgtgctgagtatgttaaagctattggttctgtagttgtt	14	0	0	0	0	0	14	0	0	0	0	0	0	0	0	0	0	0	0	0	0	0	0	0	0	0	0	0	0	0	0	0	0	0	0	0	0	0
Thalassiosira antarctica	0.947368	DQ514795	Thalassiosira	Thalassiosiraceae	Thalassiosirales	Mediophyceae	species	['Thalassiosira antarctica']	Thalassiosira antarctica	160265	aaacatcacagcggctactatgaaagaaatatacaaacgtgctgagtatgctaaagctattggttctgtagttatt	14	14	0	0	0	0	0	0	0	0	0	0	0	0	0	0	0	0	0	0	0	0	0	0	0	0	0	0	0	0	0	0	0	0	0	0	0	0
Thalassiosira antarctica	0.960526	DQ514795	Thalassiosira	Thalassiosiraceae	Thalassiosirales	Mediophyceae	species	['Thalassiosira antarctica']	Thalassiosira antarctica	160265	aaacatcacagctgctactatggaagaagtatacaaacgtgctgagtatgctaaagctattggttctgtagtaatc	12	0	0	0	0	0	0	0	0	0	0	0	0	0	0	12	0	0	0	0	0	0	0	0	0	0	0	0	0	0	0	0	0	0	0	0	0	0
Thalassiosira antarctica	0.973684	DQ514795	Thalassiosira	Thalassiosiraceae	Thalassiosirales	Mediophyceae	species	['Thalassiosira antarctica']	Thalassiosira antarctica	160265	aaacatcacagcagctactatggaagaagtgtacaaacgtgctgagtatgctaaagctattggttctgtagttgtt	11	0	0	0	0	0	0	0	0	0	0	0	0	11	0	0	0	0	0	0	0	0	0	0	0	0	0	0	0	0	0	0	0	0	0	0	0	0
Thalassiosira antarctica	0.961039	DQ514795	Thalassiosira	Thalassiosiraceae	Thalassiosirales	Mediophyceae	species	['Thalassiosira antarctica']	Thalassiosira antarctica	160265	aaacatcacagctgctactatggaagaagtatacaaacgtggtgagtatgctaaagctttaggttctgtagttgtt	11	0	0	0	0	0	0	0	0	0	0	0	0	0	0	0	0	0	0	0	0	0	0	0	0	0	0	0	0	0	0	0	0	11	0	0	0	0
Thalassiosira antarctica	0.986842	DQ514795	Thalassiosira	Thalassiosiraceae	Thalassiosirales	Mediophyceae	species	['Thalassiosira antarctica']	Thalassiosira antarctica	160265	aaacatcacatctgctactatggaagaagtatacaaacgtgctgagtatgctaaagctattggttctgtagttgtt	10	0	0	0	0	0	0	0	0	0	0	0	0	0	0	0	0	0	0	0	0	0	0	0	0	0	0	0	0	0	0	0	0	10	0	0	0	0
Thalassiosira antarctica	0.973684	DQ514795	Thalassiosira	Thalassiosiraceae	Thalassiosirales	Mediophyceae	species	['Thalassiosira antarctica']	Thalassiosira antarctica	160265	aaacatcacagctgctactatggaagaagtatacaaacgtgctgagtatgctaaagctattggttctgtagttatc	10	0	0	0	0	0	0	0	0	0	0	0	0	0	0	10	0	0	0	0	0	0	0	0	0	0	0	0	0	0	0	0	0	0	0	0	0	0
Thalassiosira antarctica	0.961039	DQ514795	Thalassiosira	Thalassiosiraceae	Thalassiosirales	Mediophyceae	species	['Thalassiosira antarctica']	Thalassiosira antarctica	160265	aaacatcacgacggctactatggaagaagtatacaaacgtgctgagtatgctaaagctattggttctgtagttgtt	10	0	0	0	0	0	0	0	0	0	0	0	0	0	0	0	0	0	0	0	0	0	0	0	0	0	0	0	0	0	0	0	0	0	10	0	0	0
Thalassiosira antarctica	0.947368	DQ514795	Thalassiosira	Thalassiosiraceae	Thalassiosirales	Mediophyceae	species	['Thalassiosira antarctica']	Thalassiosira antarctica	160265	aaacatcacagcggctactataaaaaaagtatacaaacgtgctgagtatgctaaagctattggttctgtagttgtt	10	0	0	0	0	0	0	10	0	0	0	0	0	0	0	0	0	0	0	0	0	0	0	0	0	0	0	0	0	0	0	0	0	0	0	0	0	0
Thalassiosira decipiens	1	KC985734	Thalassiosira	Thalassiosiraceae	Thalassiosirales	Mediophyceae	species	['Thalassiosira decipiens']	Thalassiosira decipiens	1366658	aaacattaccgctgctacaatggaagaagtatacaaacgtgctgagtatgctaaagctattggttctatcgttgtt	2241	0	265	142	149	52	109	311	464	231	0	518	0	0	0	0	0	0	0	0	0	0	0	0	0	0	0	0	0	0	0	0	0	0	0	0	0	0
Thalassiosira delicata	1	KC985737	Thalassiosira	Thalassiosiraceae	Thalassiosirales	Mediophyceae	species	['Thalassiosira delicata']	Thalassiosira delicata	1366863	aaacgttactgcagctactatggaagaagtatacaaacgtgctgagtatgctaaaactttaggttctatcgttatc	238585	3893	1857	5929	14694	3017	4283	2450	3627	3887	1345	14428	6419	4777	9684	5956	893	4473	13841	1344	7746	2696	771	0	10906	0	2041	699	0	0	0	0	29	875	53733	65	0	52227
Thalassiosira delicata	0.986842	KC985737	Thalassiosira	Thalassiosiraceae	Thalassiosirales	Mediophyceae	species	['Thalassiosira delicata']	Thalassiosira delicata	1366863	aaacgttactgcagctactatgaaagaagtatacaaacgtgctgagtatgctaaaactttaggttctatcgttatc	1058	0	0	838	0	0	0	0	0	0	207	0	0	0	0	0	0	0	0	0	0	0	0	0	0	0	0	0	0	0	0	0	0	0	0	0	0	13
Thalassiosira delicata	0.986842	KC985737	Thalassiosira	Thalassiosiraceae	Thalassiosirales	Mediophyceae	species	['Thalassiosira delicata']	Thalassiosira delicata	1366863	aaacgttactgcagctactatggaagaagtatacaaacgtgctgagtatgttaaaactttaggttctatcgttatc	1048	0	0	0	264	0	0	0	0	0	0	0	0	0	734	0	0	0	0	0	0	0	0	0	0	0	0	0	0	0	0	0	0	0	29	0	0	21
Thalassiosira delicata	0.986842	KC985737	Thalassiosira	Thalassiosiraceae	Thalassiosirales	Mediophyceae	species	['Thalassiosira delicata']	Thalassiosira delicata	1366863	aaacattactgcagctactatggaagaagtatacaaacgtgctgagtatgctaaaactttaggttctatcgttatc	859	15	31	30	43	24	168	0	171	0	135	23	33	13	0	22	0	33	27	0	0	15	0	0	12	0	0	0	0	0	0	0	0	0	38	0	0	26
Thalassiosira delicata	0.986842	KC985737	Thalassiosira	Thalassiosiraceae	Thalassiosirales	Mediophyceae	species	['Thalassiosira delicata']	Thalassiosira delicata	1366863	aaacgttactgcagctactatggaagaagtatacaaacgtactgagtatgctaaaactttaggttctatcgttatc	575	0	0	0	0	0	0	0	0	559	0	0	0	0	0	0	0	0	0	0	0	0	0	0	0	0	0	0	0	0	0	0	0	0	16	0	0	0
Thalassiosira delicata	0.973684	KC985737	Thalassiosira	Thalassiosiraceae	Thalassiosirales	Mediophyceae	species	['Thalassiosira delicata']	Thalassiosira delicata	1366863	aaacgttactgcagctactatgaaagaagtatacaaacgtgctgagtatgctaaaactttaggttctatcattatc	486	0	0	0	0	0	0	0	0	0	0	0	0	486	0	0	0	0	0	0	0	0	0	0	0	0	0	0	0	0	0	0	0	0	0	0	0	0
Thalassiosira delicata	0.986842	KC985737	Thalassiosira	Thalassiosiraceae	Thalassiosirales	Mediophyceae	species	['Thalassiosira delicata']	Thalassiosira delicata	1366863	aaacgttactgcagctactatggaagaagtatacaaacgtgctgagtatgctaaaactttaggctctatcgttatc	438	0	0	0	21	0	0	0	0	0	0	13	11	26	12	0	0	0	20	0	23	176	0	0	11	0	0	0	0	0	0	0	0	0	70	0	0	55
Thalassiosira delicata	0.947368	KC985737	Thalassiosira	Thalassiosiraceae	Thalassiosirales	Mediophyceae	species	['Thalassiosira delicata']	Thalassiosira delicata	1366863	aaacattactgctgcgacaatggaagaagtatacaaacgtgctgagtatgctaaaactttaggttctatcgttatc	380	10	0	33	32	13	11	0	0	0	0	39	45	0	0	14	22	65	27	12	0	31	0	0	0	0	0	0	0	0	0	0	0	0	0	0	0	26
Thalassiosira delicata	0.986842	KC985737	Thalassiosira	Thalassiosiraceae	Thalassiosirales	Mediophyceae	species	['Thalassiosira delicata']	Thalassiosira delicata	1366863	aaacgttactgcagctactatggaagaagtatacaaacgtgctgagtatgctaaaactttaggttctatcgttatt	373	14	0	0	96	74	51	10	13	0	0	19	12	15	14	16	0	0	0	0	0	0	0	0	0	0	0	0	0	0	0	0	0	0	20	0	0	19
Thalassiosira delicata	0.986842	KC985737	Thalassiosira	Thalassiosiraceae	Thalassiosirales	Mediophyceae	species	['Thalassiosira delicata']	Thalassiosira delicata	1366863	aaacgttactacagctactatggaagaagtatacaaacgtgctgagtatgctaaaactttaggttctatcgttatc	359	0	0	0	15	0	47	0	0	0	0	87	88	0	15	0	18	0	0	0	41	0	0	0	0	0	0	0	0	0	0	0	0	0	27	0	0	21
Thalassiosira delicata	0.986842	KC985737	Thalassiosira	Thalassiosiraceae	Thalassiosirales	Mediophyceae	species	['Thalassiosira delicata']	Thalassiosira delicata	1366863	aaacgttactgcagctactatggaagaagtatacaaacgtgttgagtatgctaaaactttaggttctatcgttatc	325	0	0	45	201	0	0	18	0	0	0	0	17	0	0	0	0	0	0	0	0	0	0	0	0	0	0	0	0	0	0	0	0	0	18	0	0	26
Thalassiosira delicata	0.986842	KC985737	Thalassiosira	Thalassiosiraceae	Thalassiosirales	Mediophyceae	species	['Thalassiosira delicata']	Thalassiosira delicata	1366863	aaacgttactgcagctactatggaagaagtatacaaatgtgctgagtatgctaaaactttaggttctatcgttatc	322	0	0	223	16	16	10	0	0	0	0	24	0	0	0	0	0	0	0	0	0	0	0	0	0	0	0	0	0	0	0	0	0	0	17	0	0	16
Thalassiosira delicata	0.986842	KC985737	Thalassiosira	Thalassiosiraceae	Thalassiosirales	Mediophyceae	species	['Thalassiosira delicata']	Thalassiosira delicata	1366863	aaacgttactgcagctactatggaagaagtatacaaacgtgctgagtgtgctaaaactttaggttctatcgttatc	268	0	0	12	0	0	0	0	0	0	0	15	0	0	0	0	0	0	14	121	0	0	0	0	22	0	0	0	0	0	0	0	0	0	54	0	0	30
Thalassiosira delicata	0.986842	KC985737	Thalassiosira	Thalassiosiraceae	Thalassiosirales	Mediophyceae	species	['Thalassiosira delicata']	Thalassiosira delicata	1366863	aaacgttactgtagctactatggaagaagtatacaaacgtgctgagtatgctaaaactttaggttctatcgttatc	258	0	0	0	184	0	0	0	0	0	0	0	12	0	0	0	0	0	0	0	0	0	0	0	0	0	0	0	0	0	0	0	0	0	44	0	0	18
Thalassiosira delicata	0.986842	KC985737	Thalassiosira	Thalassiosiraceae	Thalassiosirales	Mediophyceae	species	['Thalassiosira delicata']	Thalassiosira delicata	1366863	aaacgttactgcagctactatggaagaagtatacaaacgttctgagtatgctaaaactttaggttctatcgttatc	253	195	0	0	0	0	0	0	0	0	0	0	0	0	0	0	0	0	0	0	0	0	0	0	0	0	0	0	0	0	0	0	0	0	31	0	0	27
Thalassiosira delicata	0.986842	KC985737	Thalassiosira	Thalassiosiraceae	Thalassiosirales	Mediophyceae	species	['Thalassiosira delicata']	Thalassiosira delicata	1366863	aaacgttactgcagctactatggaagaagtatacaaacatgctgagtatgctaaaactttaggttctatcgttatc	252	0	138	0	14	0	23	0	0	0	0	0	0	0	0	0	0	0	0	0	0	0	0	0	0	0	0	0	0	0	0	0	0	0	53	0	0	24
Thalassiosira delicata	0.986842	KC985737	Thalassiosira	Thalassiosiraceae	Thalassiosirales	Mediophyceae	species	['Thalassiosira delicata']	Thalassiosira delicata	1366863	aaacgttacagcagctactatggaagaagtatacaaacgtgctgagtatgctaaaactttaggttctatcgttatc	241	0	0	51	12	0	0	0	0	0	0	34	41	0	0	0	0	0	0	0	0	0	0	0	0	0	0	0	0	0	0	0	0	0	25	0	0	78
Thalassiosira delicata	0.947368	KC985737	Thalassiosira	Thalassiosiraceae	Thalassiosirales	Mediophyceae	species	['Thalassiosira delicata']	Thalassiosira delicata	1366863	aaacatcacagctgctactatggaagaagtatacaaacgtgctgagtatgctaaaactttaggttctatcgttatc	234	0	0	17	21	11	13	0	0	0	0	35	46	24	20	47	0	0	0	0	0	0	0	0	0	0	0	0	0	0	0	0	0	0	0	0	0	0
Thalassiosira delicata	0.986842	KC985737	Thalassiosira	Thalassiosiraceae	Thalassiosirales	Mediophyceae	species	['Thalassiosira delicata']	Thalassiosira delicata	1366863	aaacgttactgcagccactatggaagaagtatacaaacgtgctgagtatgctaaaactttaggttctatcgttatc	232	24	0	0	19	0	0	0	0	0	0	0	0	0	22	10	0	0	15	0	0	0	0	0	50	0	0	0	0	0	0	0	0	0	37	0	0	55
Thalassiosira delicata	0.960526	KC985737	Thalassiosira	Thalassiosiraceae	Thalassiosirales	Mediophyceae	species	['Thalassiosira delicata']	Thalassiosira delicata	1366863	aaacgttactgcagctactatggaagaagtatacaaacgtactaaatatgctaaaactttaggttctatcgttatc	220	0	0	0	0	0	0	0	0	0	0	0	0	0	0	220	0	0	0	0	0	0	0	0	0	0	0	0	0	0	0	0	0	0	0	0	0	0
Thalassiosira delicata	0.960526	KC985737	Thalassiosira	Thalassiosiraceae	Thalassiosirales	Mediophyceae	species	['Thalassiosira delicata']	Thalassiosira delicata	1366863	aaacgttacagctgccactatggaagaagtatacaaacgtgctgagtatgctaaaactttaggttctatcgttatc	219	0	0	22	15	15	14	0	0	0	0	34	50	0	0	26	0	0	0	0	0	0	0	0	15	0	0	0	0	0	0	0	0	0	17	0	0	11
Thalassiosira delicata	0.947368	KC985737	Thalassiosira	Thalassiosiraceae	Thalassiosirales	Mediophyceae	species	['Thalassiosira delicata']	Thalassiosira delicata	1366863	aaacatcacagcggctactatggaagaagtatacaaacgtgctgagtatgctaaaactttaggttctatcgttatc	211	0	0	22	15	0	12	0	0	0	0	22	30	42	0	40	0	0	0	12	0	16	0	0	0	0	0	0	0	0	0	0	0	0	0	0	0	0
Thalassiosira delicata	0.973684	KC985737	Thalassiosira	Thalassiosiraceae	Thalassiosirales	Mediophyceae	species	['Thalassiosira delicata']	Thalassiosira delicata	1366863	aaacgttactgcagctactatggaagaagtatacaaacgtgctgagtatgctaaaactttaggttttattgttatc	195	0	195	0	0	0	0	0	0	0	0	0	0	0	0	0	0	0	0	0	0	0	0	0	0	0	0	0	0	0	0	0	0	0	0	0	0	0
Thalassiosira delicata	0.934211	KC985737	Thalassiosira	Thalassiosiraceae	Thalassiosirales	Mediophyceae	species	['Thalassiosira delicata']	Thalassiosira delicata	1366863	aaacattacagctgcgacaatggaagaagtatacaaacgtgctgagtatgctaaaactttaggttctatcgttatc	187	0	0	63	30	11	24	0	0	0	0	0	0	16	0	14	0	19	0	0	0	10	0	0	0	0	0	0	0	0	0	0	0	0	0	0	0	0
Thalassiosira delicata	0.986842	KC985737	Thalassiosira	Thalassiosiraceae	Thalassiosirales	Mediophyceae	species	['Thalassiosira delicata']	Thalassiosira delicata	1366863	aaacgttactgcagctactatggaagaagtatataaacgtgctgagtatgctaaaactttaggttctatcgttatc	171	10	0	40	0	0	0	0	0	88	0	0	0	0	0	0	0	0	0	0	0	0	0	0	0	0	0	0	0	0	0	0	0	0	14	0	0	19
Thalassiosira delicata	0.986842	KC985737	Thalassiosira	Thalassiosiraceae	Thalassiosirales	Mediophyceae	species	['Thalassiosira delicata']	Thalassiosira delicata	1366863	aaacgttactgcagctactatggaagaagtatacaaacgtgctgagtatgctaaaactttaggttttatcgttatc	131	64	0	0	0	0	0	50	0	0	0	0	0	0	0	0	0	0	0	0	0	0	0	0	0	0	0	0	0	0	0	0	0	0	0	0	0	17
Thalassiosira delicata	0.973684	KC985737	Thalassiosira	Thalassiosiraceae	Thalassiosirales	Mediophyceae	species	['Thalassiosira delicata']	Thalassiosira delicata	1366863	aaacgttactgcagctactatggaagaagtatacaaacgtgctgagtatgctaaaactttaggttctatcgttgtt	103	0	0	0	0	11	0	0	10	0	0	18	23	0	16	13	0	0	0	0	0	12	0	0	0	0	0	0	0	0	0	0	0	0	0	0	0	0
Thalassiosira delicata	0.986842	KC985737	Thalassiosira	Thalassiosiraceae	Thalassiosirales	Mediophyceae	species	['Thalassiosira delicata']	Thalassiosira delicata	1366863	aaacgttactgcagctactatggaagaagtatacaaacgtgctgagtatgctaaaactttaggttctatagttatc	94	0	0	0	0	0	0	0	0	0	0	13	0	0	0	0	0	0	0	0	0	0	0	0	0	0	0	0	0	0	0	0	0	0	40	0	0	41
Thalassiosira delicata	0.973684	KC985737	Thalassiosira	Thalassiosiraceae	Thalassiosirales	Mediophyceae	species	['Thalassiosira delicata']	Thalassiosira delicata	1366863	aaacgttacttctgctactatggaagaagtatacaaacgtgctgagtatgctaaaactttaggttctatcgttatc	90	0	0	0	0	0	0	0	0	0	0	10	0	11	13	56	0	0	0	0	0	0	0	0	0	0	0	0	0	0	0	0	0	0	0	0	0	0
Thalassiosira delicata	0.986842	KC985737	Thalassiosira	Thalassiosiraceae	Thalassiosirales	Mediophyceae	species	['Thalassiosira delicata']	Thalassiosira delicata	1366863	aaacgttactgcatctactatggaagaagtatacaaacgtgctgagtatgctaaaactttaggttctatcgttatc	65	0	0	0	0	0	0	0	0	0	0	10	0	0	0	0	0	0	0	0	0	0	0	0	0	0	0	0	0	0	0	0	0	0	26	0	0	29
Thalassiosira delicata	0.973684	KC985737	Thalassiosira	Thalassiosiraceae	Thalassiosirales	Mediophyceae	species	['Thalassiosira delicata']	Thalassiosira delicata	1366863	aaacgttactgcagctactatggaagaagtatacaaacgtgctgagtatgctaaaactttaaattctatcgttatc	51	0	0	51	0	0	0	0	0	0	0	0	0	0	0	0	0	0	0	0	0	0	0	0	0	0	0	0	0	0	0	0	0	0	0	0	0	0
Thalassiosira delicata	0.986842	KC985737	Thalassiosira	Thalassiosiraceae	Thalassiosirales	Mediophyceae	species	['Thalassiosira delicata']	Thalassiosira delicata	1366863	aaacgttactgcagctactatggaagaagtatacaaacttgctgagtatgctaaaactttaggttctatcgttatc	47	0	0	0	0	0	0	0	0	0	0	0	0	0	0	0	0	0	0	0	0	0	0	0	10	0	0	0	0	0	0	0	0	0	23	0	0	14
Thalassiosira delicata	0.986842	KC985737	Thalassiosira	Thalassiosiraceae	Thalassiosirales	Mediophyceae	species	['Thalassiosira delicata']	Thalassiosira delicata	1366863	taacgttactgcagctactatggaagaagtatacaaacgtgctgagtatgctaaaactttaggttctatcgttatc	46	0	0	0	0	0	0	0	0	0	0	0	0	0	0	0	0	0	0	0	0	0	0	0	10	0	0	0	0	0	0	0	0	0	18	0	0	18
Thalassiosira delicata	0.973684	KC985737	Thalassiosira	Thalassiosiraceae	Thalassiosirales	Mediophyceae	species	['Thalassiosira delicata']	Thalassiosira delicata	1366863	aaacgttactgcagctactatggaagaagtatacaaacgtgctgagtatgttaaaactttaggttctattgttatc	37	0	0	0	0	0	0	37	0	0	0	0	0	0	0	0	0	0	0	0	0	0	0	0	0	0	0	0	0	0	0	0	0	0	0	0	0	0
Thalassiosira delicata	0.960526	KC985737	Thalassiosira	Thalassiosiraceae	Thalassiosirales	Mediophyceae	species	['Thalassiosira delicata']	Thalassiosira delicata	1366863	aaacgttacagctgctacaatggaagaagtatacaaacgtgctgagtatgctaaaactttaggttctatcgttatc	34	0	0	0	0	0	0	0	0	0	0	24	10	0	0	0	0	0	0	0	0	0	0	0	0	0	0	0	0	0	0	0	0	0	0	0	0	0
Thalassiosira delicata	0.973684	KC985737	Thalassiosira	Thalassiosiraceae	Thalassiosirales	Mediophyceae	species	['Thalassiosira delicata']	Thalassiosira delicata	1366863	aaacgttactgcagctactatggaagaaatatacaaacgtgctgagtatgctaaaactttaggctctatcgttatc	32	0	0	0	0	0	0	32	0	0	0	0	0	0	0	0	0	0	0	0	0	0	0	0	0	0	0	0	0	0	0	0	0	0	0	0	0	0
Thalassiosira delicata	0.973684	KC985737	Thalassiosira	Thalassiosiraceae	Thalassiosirales	Mediophyceae	species	['Thalassiosira delicata']	Thalassiosira delicata	1366863	aaacgttactgcagctactatggaagaagtatacaaacgtgctgagtatgctgaaactttaggttttatcgttatc	25	0	0	0	0	0	0	0	0	0	0	0	0	0	0	0	0	0	0	0	0	0	0	0	0	0	0	0	0	0	0	0	0	0	25	0	0	0
Thalassiosira delicata	0.947368	KC985737	Thalassiosira	Thalassiosiraceae	Thalassiosirales	Mediophyceae	species	['Thalassiosira delicata']	Thalassiosira delicata	1366863	aaacattactgctgcgacgatggaagaagtatacaaacgtgctgagtatgctaaaactttaggttctatcgttatc	23	0	0	23	0	0	0	0	0	0	0	0	0	0	0	0	0	0	0	0	0	0	0	0	0	0	0	0	0	0	0	0	0	0	0	0	0	0
Thalassiosira delicata	0.973684	KC985737	Thalassiosira	Thalassiosiraceae	Thalassiosirales	Mediophyceae	species	['Thalassiosira delicata']	Thalassiosira delicata	1366863	aaacgttactgcagctactatggaagaagtataccaacgtgctgagtatgttaaaactttaggttctatcgttatc	20	0	0	0	20	0	0	0	0	0	0	0	0	0	0	0	0	0	0	0	0	0	0	0	0	0	0	0	0	0	0	0	0	0	0	0	0	0
Thalassiosira delicata	0.973684	KC985737	Thalassiosira	Thalassiosiraceae	Thalassiosirales	Mediophyceae	species	['Thalassiosira delicata']	Thalassiosira delicata	1366863	aaacgttactgcagctactatggaagaagtatacaaacgtgctaaatatgctaaaactttaggttctatcgttatc	18	0	0	0	0	18	0	0	0	0	0	0	0	0	0	0	0	0	0	0	0	0	0	0	0	0	0	0	0	0	0	0	0	0	0	0	0	0
Thalassiosira delicata	0.973684	KC985737	Thalassiosira	Thalassiosiraceae	Thalassiosirales	Mediophyceae	species	['Thalassiosira delicata']	Thalassiosira delicata	1366863	aaacgttactgcagctactataaaagaagtatacaaacgtgctgagtatgctaaaactttaggttctatcgttatc	16	0	0	0	16	0	0	0	0	0	0	0	0	0	0	0	0	0	0	0	0	0	0	0	0	0	0	0	0	0	0	0	0	0	0	0	0	0
Thalassiosira delicata	0.960526	KC985737	Thalassiosira	Thalassiosiraceae	Thalassiosirales	Mediophyceae	species	['Thalassiosira delicata']	Thalassiosira delicata	1366863	taacattactgctgctactatggaagaagtatacaaacgtgctgagtatgctaaaactttaggttctatcgttatc	11	0	0	0	0	0	0	0	0	0	0	11	0	0	0	0	0	0	0	0	0	0	0	0	0	0	0	0	0	0	0	0	0	0	0	0	0	0
Thalassiosira delicata	0.986842	KC985737	Thalassiosira	Thalassiosiraceae	Thalassiosirales	Mediophyceae	species	['Thalassiosira delicata']	Thalassiosira delicata	1366863	aaacgtaactgcagctactatggaagaagtatacaaacgtgctgagtatgctaaaactttaggttctatcgttatc	10	0	0	0	0	0	0	0	0	0	0	0	0	0	0	0	0	0	0	0	0	0	0	0	0	0	0	0	0	0	0	0	0	0	10	0	0	0
Thalassiosira delicata	0.960526	KC985737	Thalassiosira	Thalassiosiraceae	Thalassiosirales	Mediophyceae	species	['Thalassiosira delicata']	Thalassiosira delicata	1366863	aaacatcacagcagctactatggaagaagtatacaaacgtgctgagtatgctaaaactttaggttctatcgttatc	10	0	0	0	0	0	0	0	0	0	0	0	0	0	0	10	0	0	0	0	0	0	0	0	0	0	0	0	0	0	0	0	0	0	0	0	0	0
Thalassiosira gravida	1	FJ002106	Thalassiosira	Thalassiosiraceae	Thalassiosirales	Mediophyceae	species	['Thalassiosira gravida']	Thalassiosira gravida	420259	aaacgttacagctgctacaatggaagaaacatacaagcgtgctgagtatgctaaagccattggttctatcgttgtt	304932	1797	2062	6704	9106	1672	1110	16297	25429	38230	5519	53066	24946	18992	15112	7335	1315	2173	12205	7876	20325	23018	0	1246	3529	50	3498	1779	495	0	29	0	17	0	0	0	0	0
Thalassiosira gravida	0.986842	FJ002106	Thalassiosira	Thalassiosiraceae	Thalassiosirales	Mediophyceae	species	['Thalassiosira gravida']	Thalassiosira gravida	420259	aaacgttacagctgctacaatggaagaaacatacaagcgtgctgagtatgctaaagctattggttctatcgttgtt	2564	0	0	12	0	17	0	15	29	32	0	54	35	687	1593	0	0	0	0	21	0	69	0	0	0	0	0	0	0	0	0	0	0	0	0	0	0	0
Thalassiosira gravida	0.973684	FJ002106	Thalassiosira	Thalassiosiraceae	Thalassiosirales	Mediophyceae	species	['Thalassiosira gravida']	Thalassiosira gravida	420259	aaacgttacagctgctacaatggaagaaacatacaagcgtgctgagtatgttaaagtcattggttctatcgttgtt	2539	0	0	0	0	0	0	0	0	2539	0	0	0	0	0	0	0	0	0	0	0	0	0	0	0	0	0	0	0	0	0	0	0	0	0	0	0	0
Thalassiosira gravida	0.934211	FJ002106	Thalassiosira	Thalassiosiraceae	Thalassiosirales	Mediophyceae	species	['Thalassiosira gravida']	Thalassiosira gravida	420259	aaacgttacagctgctacgataaaagaaacatacaagcgtgctgagtatgctaaagccattaattctatcgttgtt	1967	0	0	0	0	0	0	0	0	0	0	0	0	0	0	0	0	0	0	0	0	0	0	0	1967	0	0	0	0	0	0	0	0	0	0	0	0	0
Thalassiosira gravida	0.986842	FJ002106	Thalassiosira	Thalassiosiraceae	Thalassiosirales	Mediophyceae	species	['Thalassiosira gravida']	Thalassiosira gravida	420259	aaacattacagctgctacaatggaagaaacatacaagcgtgctgagtatgctaaagccattggttctatcgttgtt	1593	0	0	38	41	12	12	129	764	74	16	94	80	53	28	23	12	17	0	67	13	120	0	0	0	0	0	0	0	0	0	0	0	0	0	0	0	0
Thalassiosira gravida	0.960526	FJ002106	Thalassiosira	Thalassiosiraceae	Thalassiosirales	Mediophyceae	species	['Thalassiosira gravida']	Thalassiosira gravida	420259	aaacgttacagctgctacaatggaagaaacatacaagcgtgctgagtatgctaaagctattggttctgtagttgtt	883	11	10	52	22	16	0	18	24	10	21	124	138	97	34	43	26	17	15	65	0	140	0	0	0	0	0	0	0	0	0	0	0	0	0	0	0	0
Thalassiosira gravida	0.986842	FJ002106	Thalassiosira	Thalassiosiraceae	Thalassiosirales	Mediophyceae	species	['Thalassiosira gravida']	Thalassiosira gravida	420259	aaacgttacagttgctacaatggaagaaacatacaagcgtgctgagtatgctaaagccattggttctatcgttgtt	841	0	0	0	0	0	0	25	0	16	98	122	0	0	12	548	0	0	0	0	10	10	0	0	0	0	0	0	0	0	0	0	0	0	0	0	0	0
Thalassiosira gravida	0.986842	FJ002106	Thalassiosira	Thalassiosiraceae	Thalassiosirales	Mediophyceae	species	['Thalassiosira gravida']	Thalassiosira gravida	420259	aaacgttacggctgctacaatggaagaaacatacaagcgtgctgagtatgctaaagccattggttctatcgttgtt	740	0	0	13	25	0	0	32	50	230	26	109	47	41	20	13	0	0	16	19	47	41	0	0	11	0	0	0	0	0	0	0	0	0	0	0	0	0
Thalassiosira gravida	0.986842	FJ002106	Thalassiosira	Thalassiosiraceae	Thalassiosirales	Mediophyceae	species	['Thalassiosira gravida']	Thalassiosira gravida	420259	aaacgttacagctgctacaatagaagaaacatacaagcgtgctgagtatgctaaagccattggttctatcgttgtt	731	0	0	0	0	0	0	31	17	21	0	27	16	0	0	0	607	0	0	0	12	0	0	0	0	0	0	0	0	0	0	0	0	0	0	0	0	0
Thalassiosira gravida	0.986842	FJ002106	Thalassiosira	Thalassiosiraceae	Thalassiosirales	Mediophyceae	species	['Thalassiosira gravida']	Thalassiosira gravida	420259	aaacgttacagctgctacaatggaagaaacatacaagcgtgctgagtatgctaaagccattggctctatcgttgtt	544	0	0	12	11	0	0	39	42	59	13	84	105	20	33	14	0	0	16	13	32	41	0	0	0	0	10	0	0	0	0	0	0	0	0	0	0	0
Thalassiosira gravida	0.973684	FJ002106	Thalassiosira	Thalassiosiraceae	Thalassiosirales	Mediophyceae	species	['Thalassiosira gravida']	Thalassiosira gravida	420259	aaacattacagctgcgacaatggaagaaacatacaagcgtgctgagtatgctaaagccattggttctatcgttgtt	448	0	0	38	0	0	0	12	16	27	0	37	75	18	22	0	0	0	0	74	0	129	0	0	0	0	0	0	0	0	0	0	0	0	0	0	0	0
Thalassiosira gravida	0.986842	FJ002106	Thalassiosira	Thalassiosiraceae	Thalassiosirales	Mediophyceae	species	['Thalassiosira gravida']	Thalassiosira gravida	420259	aaacgttacagctgctacaatgggagaaacatacaagcgtgctgagtatgctaaagccattggttctatcgttgtt	417	0	0	0	12	0	0	30	43	70	0	71	32	26	23	10	0	0	13	17	32	38	0	0	0	0	0	0	0	0	0	0	0	0	0	0	0	0
Thalassiosira gravida	0.973684	FJ002106	Thalassiosira	Thalassiosiraceae	Thalassiosirales	Mediophyceae	species	['Thalassiosira gravida']	Thalassiosira gravida	420259	aaacgttacagctgctacaatggaagaaacatacaagcgtgctgagtatgctaaagttattggttctatcgttgtt	405	0	0	0	0	0	0	0	0	405	0	0	0	0	0	0	0	0	0	0	0	0	0	0	0	0	0	0	0	0	0	0	0	0	0	0	0	0
Thalassiosira gravida	0.973684	FJ002106	Thalassiosira	Thalassiosiraceae	Thalassiosirales	Mediophyceae	species	['Thalassiosira gravida']	Thalassiosira gravida	420259	aaacgttacagctgctacaatggaagaaacatacaagcgtgctgagtatgctaaagccattggttctgtagttgtt	369	0	11	24	14	0	0	0	10	0	11	49	66	33	13	17	13	0	0	26	0	82	0	0	0	0	0	0	0	0	0	0	0	0	0	0	0	0
Thalassiosira gravida	0.986842	FJ002106	Thalassiosira	Thalassiosiraceae	Thalassiosirales	Mediophyceae	species	['Thalassiosira gravida']	Thalassiosira gravida	420259	aaacgttacagctgctacaatggaagaaacatacaagcgtgctaagtatgctaaagccattggttctatcgttgtt	369	0	235	0	0	0	0	46	0	17	0	18	0	0	0	36	0	0	0	0	0	17	0	0	0	0	0	0	0	0	0	0	0	0	0	0	0	0
Thalassiosira gravida	0.986842	FJ002106	Thalassiosira	Thalassiosiraceae	Thalassiosirales	Mediophyceae	species	['Thalassiosira gravida']	Thalassiosira gravida	420259	aaacgttacagctgctacaatggaaaaaacatacaagcgtgctgagtatgctaaagccattggttctatcgttgtt	360	0	0	0	0	0	0	0	0	16	332	12	0	0	0	0	0	0	0	0	0	0	0	0	0	0	0	0	0	0	0	0	0	0	0	0	0	0
Thalassiosira gravida	0.973684	FJ002106	Thalassiosira	Thalassiosiraceae	Thalassiosirales	Mediophyceae	species	['Thalassiosira gravida']	Thalassiosira gravida	420259	aaacgttacagctgctacaatggaagaaacatacaagcgtgctgagtatgctaaagccattaattctatcgttgtt	357	0	0	0	0	0	0	0	0	0	357	0	0	0	0	0	0	0	0	0	0	0	0	0	0	0	0	0	0	0	0	0	0	0	0	0	0	0
[truncated: 189 more rows]
[truncated: 45 more columns]
