# Supplementary material for: Changes in the composition of marine and sea-ice diatoms derived from sedimentary ancient DNA of the eastern Fram Strait over the past 30 000 years
Source: Copernicus journal article supplement (doi:10.5194/os-16-1017-2020), 2020-09-07
Supplement: Supplementary file 2 [file SupplementaryTableS2.xlsx]

## Sheet: Tabelle1
														extraction negative controls							PCR negative controls
													Read counts	9	16	41	69	15	60	25	44	1	55	48	15	38	36
													Number of ASVs	4	11	27	52	15	34	19	24	1	32	30	10	24	30
													Number of singletons	3	8	20	43	15	28	18	17	1	25	27	9	20	25
scientific_name_by_db:diat_embl138_final	best_identity:diat_embl138_final	sequence	best_match:diat_embl138_final	rank_by_db:diat_embl138_final	order_name	family_name	genus_name	scientific_name	species_list:diat_embl138_final	taxid_by_db:diat_embl138_final	match_count:diat_embl138_final	count	counts_negcontrols	SO013P.10_blank	IE030P.06_blank	IE031P.06_blank	IE033P.10_blank	IE034P.06_blank	SO008P.10_blank	SO015P.10_blank	SO015P.11_NTC	SO008P.11_NTC	IE034P.08_NTC	IE035P.11_NTC	IE031P.07_NTC	IE030P.07_NTC	HZ222P.09_NTC
Actinocyclus sp. 1 MPA-2013	0.960526	aaacattactgcagctacaatggaagagatttacacgcgtgctgactatgctaaaacagttggttcgatagttgta	KC309595	species	Coscinodiscales	Hemidiscaceae	Actinocyclus	Actinocyclus sp. 1 MPA-2013	['Actinocyclus sp. 1 MPA-2013']	1335100	1	26165	2	0	0	0	1	0	0	1	0	0	0	0	0	0	0
Actinocyclus sp. 1 MPA-2013	1	aaatattactgcagctacaatggaagatatttacgcgcgtgctgactatgctaaaacagttggttcgatagttgta	KC309595	species	Coscinodiscales	Hemidiscaceae	Actinocyclus	Actinocyclus sp. 1 MPA-2013	['Actinocyclus sp. 1 MPA-2013']	1335100	1	13046	2	0	0	0	1	0	0	0	0	0	1	0	0	0	0
Alaria esculenta	1	aaacgttactgctgcaacaatggaacaaatatatgaacgtgcagagtacgctcattcaattggtactgttattgta	AF064745	species	Laminariales	Alariaceae	Alaria	Alaria esculenta	['Alaria esculenta']	2889	1	7182	1	0	0	0	0	0	0	0	0	0	0	0	0	1	0
Attheya	0.986842	aaacgttactgctgcgactatggaagatgtttacaaacgtgctgaatttgctaagcaagttggttctgtaatcatc	FJ002122	genus	Chaetocerotales	Attheyaceae	Attheya	Attheya	[]	265578	1	12064	2	0	0	0	0	0	0	0	1	0	1	0	0	0	0
Bacillaria sp.	0.973684	aaacgttacagctgcaacaatggaagaagtgtacaaacgtgctgagtacgctaaagaagttggttctgtaattatc	MH064069	species	Bacillariales	Bacillariaceae	Bacillaria	Bacillaria sp.	['Bacillaria sp.']	2014767	1	26108	1	0	0	0	0	0	0	0	0	0	0	0	0	0	1
Bacillaria sp.	0.960526	aaacgttacagctgcaacaatggaagaagtatacaaacgtgctgagtacgctaaagaagttggttctgtaattatc	MH064069	species	Bacillariales	Bacillariaceae	Bacillaria	Bacillaria sp.	['Bacillaria sp.']	2014767	2	23	1	0	0	0	0	0	1	0	0	0	0	0	0	0	0
Bacillariaceae	0.907895	aaacgttacagctgctacttgggaagaagtacttaaacgttgtgagtatgcaaaacaagtaggttctatcgttgtt	HF675111	family	Bacillariales	Bacillariaceae	NA	Bacillariaceae	['Nitzschia frustulum', 'Nitzschia soratensis', 'Pseudo-nitzschia calliantha', 'Nitzschia cf. frustulum', 'Nitzschia cf. pusilla']	33852	16	2224	2	0	0	0	0	0	0	0	0	0	0	2	0	0	0
Bacillariaceae	0.934211	aaacgttacagcttctactatggaagaagttattaaacgttgtgagtacgctaaagaagtaggttctatcgttgta	EF423502	family	Bacillariales	Bacillariaceae	NA	Bacillariaceae	['Pseudo-nitzschia fraudulenta', 'Pseudo-nitzschia multistriata', 'Pseudo-nitzschia pungens', 'Nitzschia cf. microcephala LRT-2013', 'Pseudo-nitzschia galaxiae', 'Pseudo-nitzschia multiseries', 'Fragilariopsis kerguelensis', 'Pseudo-nitzschia brasiliana', 'Nitzschia aurariae']	33852	26	24370	1	0	0	0	0	0	0	0	0	0	0	1	0	0	0
Bacillariaceae	0.973684	aaacattactgcagctactatggaagaagtatacaaacgttctgagtatgctaaagaagtaggttctatcgttatc	KC969721	family	Bacillariales	Bacillariaceae	NA	Bacillariaceae	['Nitzschia sp. 1BOF', 'Cylindrotheca closterium', 'Cylindrotheca sp. 1BOF', 'Cylindrotheca sp. 2BOF', 'Cylindrotheca sp. 3BOF']	33852	6	35	1	0	0	0	0	0	1	0	0	0	0	0	0	0	0
Bacillariaceae	0.960526	aaacgttactgctgctactatggaagaagtatacaaacgtgctgagtacgctaaagaagtaggttctatagttatc	KC969715	family	Bacillariales	Bacillariaceae	NA	Bacillariaceae	['Nitzschia sp. 1BOF', 'Cylindrotheca closterium', 'Cylindrotheca sp. 1BOF', 'Cylindrotheca sp. 2BOF', 'Cylindrotheca sp. 3BOF']	33852	10	10	1	0	0	0	1	0	0	0	0	0	0	0	0	0	0
Bacillariophycidae	0.910256	aaacgttacagctgctacttgggaagaagtacttaaacgtatggaatacgctaaagaagtaggttctatcgttgtt	HF675103	no rank	NA	NA	NA	Bacillariophycidae	['Nitzschia aurariae', 'Pseudo-nitzschia pungens', 'Pseudo-nitzschia multiseries', 'Pseudo-nitzschia galaxiae', 'Nitzschia cf. microcephala LRT-2013', 'Pseudo-nitzschia calliantha', 'Nitzschia cf. pusilla']	33850	12	19597	1	0	0	1	0	0	0	0	0	0	0	0	0	0	0
Bacillariophycidae	0.961039	aaacatcactgctggtacaatggaagaagtttacaagcgtgctgagtacgctaagctagtaggttctatcgttgtt	MF000636	no rank	NA	NA	NA	Bacillariophycidae	['Campylodiscus sp. 3613.8', 'Cymatopleura solea', 'Entomoneis cf. alata', 'Petrodictyon gemma', 'Entomoneis sp.']	33850	7	30	1	0	0	0	0	0	0	0	0	0	0	1	0	0	0
Bacillariophycidae	0.934211	aaacattactgctggtacaatggaagacgtatacaaacgtgcagaatacgcgaaagctgtaggttctatcgttgtt	KM078662	no rank	NA	NA	NA	Bacillariophycidae	[]	33850	66	26	1	0	0	0	0	0	0	0	0	0	0	1	0	0	0
Bacillariophycidae	0.921053	aaacgtaactgcagcgactatggaagaagtgtacaagcgtgctgactatgctaaagctgttggttctgtaattatc	MH125179	no rank	NA	NA	NA	Bacillariophycidae	['Hippodonta capitata', 'Navicula salinicola', 'Navicula sp.', 'Aneumastus rostratus']	33850	5	12	1	0	0	0	0	0	0	1	0	0	0	0	0	0	0
Bacillariophycidae	0.960526	aaacatcactgcaggtacaatggaagaagtttacaaacgtgctgagtatgctaaatcagtaggttctgtagttgta	HQ912398	no rank	NA	NA	NA	Bacillariophycidae	[]	33850	179	12	1	0	0	0	0	0	0	0	0	0	1	0	0	0	0
Bacillariophyta	0.922078	taacattactgcagctactatggaagacgtttacaaacgtgcagagtatgctaagcaagtcggttctatcattgta	KM084942	phylum	NA	NA	NA	Bacillariophyta	[]	2836	30	8142	2	0	0	0	1	0	0	0	1	0	0	0	0	0	0
Bacillariophyta	0.960526	aaacgttactgcagctactatggaagaagtatacaaacgtgctgagtatgctaaagctattggttctgtagttgtt	KC969854	phylum	NA	NA	NA	Bacillariophyta	['Thalassiosira sp. 11BOF', 'Navicula capitatoradiata', 'Navicula radiosa', 'Thalassiosira angulata', 'Detonula pumila', 'Thalassiosira minuscula']	2836	7	1255	2	0	0	0	2	0	0	0	0	0	0	0	0	0	0
Bacillariophyta	0.921053	aaacgtaactgcagcgactatggaagaagtgtacaagcgtgctgactatgctaaagctgttggttctgttgtaatc	KJ577893	phylum	NA	NA	NA	Bacillariophyta	['Chaetoceros sp. 14BOF', 'Eucampia cornuta', 'Navicula sp. SZCZCH965', 'Cerataulina pelagica']	2836	6	87159	1	0	1	0	0	0	0	0	0	0	0	0	0	0	0
Bacillariophyta	0.934211	aaacgtaacagctgcaacaatggaagaagtgtacaaacgtgctgagtacgctaaagaagttggttcaatcgtaatc	KY320315	phylum	NA	NA	NA	Bacillariophyta	['Nitzschia sp. 1BOF', 'Cylindrotheca closterium', 'Cylindrotheca sp. 1BOF', 'Cylindrotheca sp. 2BOF', 'Hantzschia amphioxys', 'Plagiostriata baltica', 'Nitzschia liebethruthii', 'Bacillaria paxillifer']	2836	9	36534	1	0	0	0	1	0	0	0	0	0	0	0	0	0	0
Bacillariophyta	0.934211	aaacattactgctggtacaatggaagacgtatacaaacgtgcagaatacgcgaaagctgtaggttctatcgttgta	HE663062	phylum	NA	NA	NA	Bacillariophyta	[]	2836	17	33768	1	0	0	0	0	0	0	0	0	0	0	1	0	0	0
Bacillariophyta	0.947368	aaacgttacttctgctactatggaagaagtatacaaacgtgctgagtatgctaaagctattggttctgtagttgtt	DQ514795	phylum	NA	NA	NA	Bacillariophyta	[]	2836	34	400	1	0	0	0	0	0	0	0	0	0	0	0	0	0	1
Bacillariophyta	0.948052	aaacgttacagcagctactatggaagaagtatacaaacgtgctgagtatgctaaagaagtaggttatatcgttatc	KC969783	phylum	NA	NA	NA	Bacillariophyta	['Nitzschia sp. 1BOF', 'Cylindrotheca closterium', 'Cylindrotheca sp. 1BOF', 'Cylindrotheca sp. 2BOF', 'Cylindrotheca sp. 3BOF']	2836	7	298	1	0	0	0	0	1	0	0	0	0	0	0	0	0	0
Bacillariophyta	0.907895	aaacgttactgcagcgactatggaagaagtgtacaagcgtgctgactatgctaaagctgttggttctgttgtaatc	KJ577893	phylum	NA	NA	NA	Bacillariophyta	['Eucampia antarctica', 'Chaetoceros sp. 14BOF', 'Tryblionella apiculata', 'Navicula sp. SZCZCH965', 'Eucampia cornuta', 'Achnanthes sp. CCAP 1095/1', 'Cerataulina pelagica', 'Lauderia annulata']	2836	11	51	1	0	0	0	1	0	0	0	0	0	0	0	0	0	0
Bacillariophyta	0.907895	aaacattactgctgcgacaatggaagaagtatacaaacgtgctgactatgctaaagctgttggttctgttgtaatc	DQ514808	phylum	NA	NA	NA	Bacillariophyta	[]	2836	28	20	1	0	0	1	0	0	0	0	0	0	0	0	0	0	0
Bacillariophyta	0.934211	aaacgttacttctgctactatggaagaagtatacaaacatgctgagtacgctaaagaagtaggttctatagttatc	KC969715	phylum	NA	NA	NA	Bacillariophyta	['Nitzschia sp. 1BOF', 'Cylindrotheca sp.', 'Cylindrotheca closterium', 'Tryblionella apiculata', 'Cylindrotheca sp. 1BOF', 'Cylindrotheca sp. 2BOF', 'Cylindrotheca sp. 3BOF', 'Hantzschia amphioxys', 'Cylindrotheca closterium lineage V', 'Nitzschia paleaeformis', 'Bacillaria paxillifer', 'Stephanopyxis palmeriana']	2836	26	10	1	0	0	0	1	0	0	0	0	0	0	0	0	0	0
Bacillariophyta	0.921053	aaatattactgctggtacaatggaagacgtatacaaacgtgcagaatacgcgaaagctgtaggttctatcgttgta	HE663062	phylum	NA	NA	NA	Bacillariophyta	[]	2836	38	9	1	0	0	0	1	0	0	0	0	0	0	0	0	0	0
Bacillariophyta	0.960526	aaacattactgctgcgacaatggaagaagcatacaaacgtgctgagtatgctaaagctattggttctatcgttgtt	AF015569	phylum	NA	NA	NA	Bacillariophyta	['Thalassiosira decipiens', 'Gomphonema sp. 2LB', 'Thalassiosira antarctica', 'Skeletonema sp.', 'Skeletonema pseudocostatum', 'Thalassiosira angulata', 'Skeletonema costatum']	2836	11	7	1	0	0	0	0	0	0	0	0	0	1	0	0	0	0
Bacillariophyta	0.947368	aaacgttacagctgccactatggaagaagtatacaaacgtgctgaatatgctaaagctattggttctgtagttgtt	DQ514795	phylum	NA	NA	NA	Bacillariophyta	[]	2836	37	5	1	0	0	0	0	0	0	1	0	0	0	0	0	0	0
Bacillariophyta	0.947368	aaacgttacagctgccactatggaagaagtatacaaacgtgctgagtatgctaaagatattggttctgtagttgtt	DQ514795	phylum	NA	NA	NA	Bacillariophyta	[]	2836	26	3	1	0	0	0	0	0	1	0	0	0	0	0	0	0	0
Bacterosira	1	aaacatcactgctgctacaatggaagaagtatacaaacgtgctgagtatgctaaagctattggttctgtagttgtt	DQ514798	genus	Thalassiosirales	Thalassiosiraceae	Bacterosira	Bacterosira	[]	382376	1	54428	8	0	0	2	1	0	0	0	2	0	2	0	0	1	0
Bacterosira	0.986842	aaacataactgctgctacaatggaagaagtatacaaacgtgctgagtatgctaaagctattggttctgtagttgtt	DQ514798	genus	Thalassiosirales	Thalassiosiraceae	Bacterosira	Bacterosira	[]	382376	1	39	2	0	0	1	0	0	0	0	0	0	0	1	0	0	0
Bacterosira	0.986842	aaacatcactgcagctacaatggaagaagtatacaaacgtgctgagtatgctaaagctattggttctgtagttgtt	DQ514798	genus	Thalassiosirales	Thalassiosiraceae	Bacterosira	Bacterosira	[]	382376	1	38	1	0	0	0	0	0	0	0	0	0	0	1	0	0	0
Bacterosira	0.986842	aaacatcactgctgctacaatggaagaagtttacaaacgtgctgagtatgctaaagctattggttctgtagttgtt	DQ514798	genus	Thalassiosirales	Thalassiosiraceae	Bacterosira	Bacterosira	[]	382376	1	18	1	0	0	0	0	1	0	0	0	0	0	0	0	0	0
Bacterosira	0.986842	aaacatcactgctgctacaatggaagaagtatactaacgtgctgagtatgctaaagctattggttctgtagttgtt	DQ514798	genus	Thalassiosirales	Thalassiosiraceae	Bacterosira	Bacterosira	[]	382376	1	15	1	0	0	0	0	1	0	0	0	0	0	0	0	0	0
Bacterosira	0.986842	aaacatcactgctgctacaatggaagaagtatacaaacgtgctgagtatgctaaagctattggttctgtatttgtt	DQ514798	genus	Thalassiosirales	Thalassiosiraceae	Bacterosira	Bacterosira	[]	382376	1	15	1	0	0	0	0	0	0	0	0	0	0	0	0	0	1
Chaetoceros	1	aaatgtaactgctgccactatggaagaagtttacaaacgttcagaatatgctaaagcagtaggttctgtaattatc	KC985540	genus	Chaetocerotales	Chaetocerotaceae	Chaetoceros	Chaetoceros	[]	49237	1	99848	3	0	0	0	1	0	0	0	0	0	0	1	0	1	0
Chaetoceros	0.986842	aaatgtaactgctgccactatggaagaagtttacaaacgttcagaatatgctaaagcagtaggttctgtaattatt	KC985540	genus	Chaetocerotales	Chaetocerotaceae	Chaetoceros	Chaetoceros	[]	49237	1	951	2	0	0	2	0	0	0	0	0	0	0	0	0	0	0
Chaetoceros	0.986842	aaatgtaactgctgccactatggaagaagtttacaaacgttcagaatatgctaaagaagtaggttctgtaattatc	KC985540	genus	Chaetocerotales	Chaetocerotaceae	Chaetoceros	Chaetoceros	[]	49237	1	100	2	0	0	0	1	0	0	0	0	0	0	0	0	0	1
Chaetoceros	0.934211	aaacgtaactgctgccactatggaagaagtttacaaacgtgctgagtacgctaaaagtgttggttcagtgatcatc	MH125167	genus	Chaetocerotales	Chaetocerotaceae	Chaetoceros	Chaetoceros	['Chaetoceros sp.', 'Chaetoceros cf. decipiens 1 SEH-2013', 'Chaetoceros cf. diadema 1 SEH-2013']	49237	3	1	1	0	0	0	0	0	0	0	0	0	0	0	0	0	1
Chaetoceros cf. contortus 1 SEH-2013	1	aaacgtaactgctgccactatggaagaagtttacaaacgttctgagtacgctaagcaagttggttctattgtaatc	KC985527	species	Chaetocerotales	Chaetocerotaceae	Chaetoceros	Chaetoceros cf. contortus 1 SEH-2013	['Chaetoceros cf. contortus 1 SEH-2013']	1367185	1	383198	2	0	0	0	0	0	0	0	1	0	1	0	0	0	0
Chaetoceros cf. contortus 1 SEH-2013	0.986842	aaacataactgctgccactatggaagaagtttacaaacgttctgagtacgctaagcaagttggttctattgtaatc	KC985527	species	Chaetocerotales	Chaetocerotaceae	Chaetoceros	Chaetoceros cf. contortus 1 SEH-2013	['Chaetoceros cf. contortus 1 SEH-2013']	1367185	1	181	2	0	0	0	0	0	0	0	0	0	1	0	0	0	1
Chaetoceros cf. contortus 1 SEH-2013	0.986842	aaacgtaactgctgccactatggaagaagtttacaaacgttccgagtacgctaagcaagttggttctattgtaatc	KC985527	species	Chaetocerotales	Chaetocerotaceae	Chaetoceros	Chaetoceros cf. contortus 1 SEH-2013	['Chaetoceros cf. contortus 1 SEH-2013']	1367185	1	431	1	0	0	0	0	0	0	0	0	0	0	0	0	0	1
Chaetoceros cf. contortus 1 SEH-2013	0.986842	aaacgtaactgctgccactatggaagaagcttacaaacgttctgagtacgctaagcaagttggttctattgtaatc	KC985527	species	Chaetocerotales	Chaetocerotaceae	Chaetoceros	Chaetoceros cf. contortus 1 SEH-2013	['Chaetoceros cf. contortus 1 SEH-2013']	1367185	1	419	1	0	0	0	0	0	0	0	0	0	0	1	0	0	0
Chaetoceros cf. contortus 1 SEH-2013	0.986842	aaacgtaacagctgccactatggaagaagtttacaaacgttctgagtacgctaagcaagttggttctattgtaatc	KC985527	species	Chaetocerotales	Chaetocerotaceae	Chaetoceros	Chaetoceros cf. contortus 1 SEH-2013	['Chaetoceros cf. contortus 1 SEH-2013']	1367185	1	140	1	0	0	0	0	0	0	0	1	0	0	0	0	0	0
Chaetoceros cf. contortus 1 SEH-2013	0.986842	aaacgttactgctgccactatggaagaagtttacaaacgttctgagtacgctaagcaagttggttctattgtaatc	KC985527	species	Chaetocerotales	Chaetocerotaceae	Chaetoceros	Chaetoceros cf. contortus 1 SEH-2013	['Chaetoceros cf. contortus 1 SEH-2013']	1367185	1	84	1	0	0	0	0	0	0	0	1	0	0	0	0	0	0
Chaetoceros cf. contortus 1 SEH-2013	0.934211	aaacattactgctgcgacaatggaagaagtatacaaacgttctgagtacgctaagcaagttggttctattgtaatc	KC985527	species	Chaetocerotales	Chaetocerotaceae	Chaetoceros	Chaetoceros cf. contortus 1 SEH-2013	['Chaetoceros cf. contortus 1 SEH-2013']	1367185	1	15	1	0	0	0	0	0	0	0	0	0	1	0	0	0	0
Chaetoceros cf. contortus 1 SEH-2013	0.973684	aaacattactgctgccactatggaagaagtttacaaacgttctgagtacgctaagcaagttggttctattgtaatc	KC985527	species	Chaetocerotales	Chaetocerotaceae	Chaetoceros	Chaetoceros cf. contortus 1 SEH-2013	['Chaetoceros cf. contortus 1 SEH-2013']	1367185	1	14	1	0	0	0	0	0	0	0	0	0	0	0	0	1	0
Chaetoceros cf. contortus 1 SEH-2013	0.947368	aaacattactgctgcgacgatggaagaagtttacaaacgttctgagtacgctaagcaagttggttctattgtaatc	KC985527	species	Chaetocerotales	Chaetocerotaceae	Chaetoceros	Chaetoceros cf. contortus 1 SEH-2013	['Chaetoceros cf. contortus 1 SEH-2013']	1367185	1	4	1	0	0	0	0	0	0	0	0	0	0	0	0	0	1
Chaetoceros cf. decipiens 1 SEH-2013	1	aaacgtaactgctgccactatggaagaagtttacaaacgtgcagaatatgctaaacaagttggttctgtaattatc	KC985591	species	Chaetocerotales	Chaetocerotaceae	Chaetoceros	Chaetoceros cf. decipiens 1 SEH-2013	['Chaetoceros cf. decipiens 1 SEH-2013']	1367189	1	33	1	0	0	0	1	0	0	0	0	0	0	0	0	0	0
Chaetoceros cf. decipiens 2 SEH-2013	0.960526	aaacattactgctgccactatggaagaagtttacaaacgtgcagaatatgctaaacaagttggttctgtagtaatc	KC985597	species	Chaetocerotales	Chaetocerotaceae	Chaetoceros	Chaetoceros cf. decipiens 2 SEH-2013	['Chaetoceros cf. decipiens 2 SEH-2013']	1367190	3	11	1	0	0	0	0	0	0	1	0	0	0	0	0	0	0
Chaetoceros cf. diadema 2 SEH-2013	1	aaacgtaactgcttctactatggaagaagtttacaaacgtgcagaatatgctaagcatgtaggttctgtagtaatc	KC985627	species	Chaetocerotales	Chaetocerotaceae	Chaetoceros	Chaetoceros cf. diadema 2 SEH-2013	['Chaetoceros cf. diadema 2 SEH-2013']	1367192	1	4843	2	0	0	0	0	0	0	0	1	0	1	0	0	0	0
Chaetoceros cf. diadema 2 SEH-2013	0.986842	aaacgtaacagcttctactatggaagaagtttacaaacgtgcagaatatgctaagcatgtaggttctgtagtaatc	KC985627	species	Chaetocerotales	Chaetocerotaceae	Chaetoceros	Chaetoceros cf. diadema 2 SEH-2013	['Chaetoceros cf. diadema 2 SEH-2013']	1367192	1	2	1	0	0	0	1	0	0	0	0	0	0	0	0	0	0
Chaetoceros cf. pseudobrevis 1 SEH-2013	1	aaatgtaactgctgccactatggaagaagtttacaaacgtgcagaatatgctaaagtagttggttctgtagttatc	KC985654	species	Chaetocerotales	Chaetocerotaceae	Chaetoceros	Chaetoceros cf. pseudobrevis 1 SEH-2013	['Chaetoceros cf. pseudobrevis 1 SEH-2013']	1367197	1	57820	1	0	0	0	0	0	0	0	0	0	0	1	0	0	0
Chaetoceros cf. pseudobrevis 1 SEH-2013	0.986842	aaatgtaactgctgccactatggaagaagtttacaaacgtgcagaatatgccaaagtagttggttctgtagttatc	KC985654	species	Chaetocerotales	Chaetocerotaceae	Chaetoceros	Chaetoceros cf. pseudobrevis 1 SEH-2013	['Chaetoceros cf. pseudobrevis 1 SEH-2013']	1367197	1	4199	1	0	0	0	0	0	1	0	0	0	0	0	0	0	0
Chaetoceros cf. pseudobrevis 1 SEH-2013	0.986842	aaatgtaactgctgccactatggaagaagtttacaaacgtgcagaatatgctaaagtagttggttctgtagttatt	KC985654	species	Chaetocerotales	Chaetocerotaceae	Chaetoceros	Chaetoceros cf. pseudobrevis 1 SEH-2013	['Chaetoceros cf. pseudobrevis 1 SEH-2013']	1367197	1	27	1	0	0	0	0	0	0	0	0	0	0	0	0	0	1
Chaetoceros cf. pseudobrevis 1 SEH-2013	0.986842	aaatgtaactgctgccactatggaagaagtttacaaacgtgctgaatatgctaaagtagttggttctgtagttatc	KC985654	species	Chaetocerotales	Chaetocerotaceae	Chaetoceros	Chaetoceros cf. pseudobrevis 1 SEH-2013	['Chaetoceros cf. pseudobrevis 1 SEH-2013']	1367197	1	19	1	0	0	0	0	0	0	0	0	0	0	1	0	0	0
Chaetoceros socialis	0.986842	aaacgtaactgctgctacaatggaagaagtttacaaacgttctgagtacgctaagcaagttggttctgtaattatc	FJ002154	species	Chaetocerotales	Chaetocerotaceae	Chaetoceros	Chaetoceros socialis	['Chaetoceros socialis']	163503	1	73122	2	0	0	0	0	0	0	0	0	0	0	1	0	0	1
Chaetoceros socialis	0.934211	aaatgtaactgcagcaacaatggaagaagtgtacaaacgttctgagtacgctaagcaagttggttctgtaattatc	FJ002154	species	Chaetocerotales	Chaetocerotaceae	Chaetoceros	Chaetoceros socialis	['Chaetoceros socialis']	163503	1	31016	1	0	0	0	1	0	0	0	0	0	0	0	0	0	0
Chaetoceros socialis	0.973684	aaacgtaactgctgctacaatggaagaagtttacaaacgttctgagtacgctaagcaagttggttctgtaatcatc	FJ002154	species	Chaetocerotales	Chaetocerotaceae	Chaetoceros	Chaetoceros socialis	['Chaetoceros socialis']	163503	1	76	1	0	0	0	0	0	0	0	0	0	0	0	0	0	1
Chaetoceros socialis	0.973684	aaatgtaactgctgctacaatggaagaagtttacaaacgttctgagtacgctaagcaagttggttctgtaattatc	FJ002154	species	Chaetocerotales	Chaetocerotaceae	Chaetoceros	Chaetoceros socialis	['Chaetoceros socialis']	163503	1	62	1	0	0	0	0	0	0	0	0	0	0	0	0	0	1
Chaetoceros socialis	1	aaacgtaactgctgctactatggaagaagtttacaaacgttctgagtacgctaagcaagttggttctgtaattatc	FJ002154	species	Chaetocerotales	Chaetocerotaceae	Chaetoceros	Chaetoceros socialis	['Chaetoceros socialis']	163503	1	31	1	0	0	0	0	0	0	0	1	0	0	0	0	0	0
Chaetoceros socialis	0.960526	aaacattactgctgctacaatggaagaagtttacaaacgttctgagtacgctaagcaagttggttctgtaattatc	FJ002154	species	Chaetocerotales	Chaetocerotaceae	Chaetoceros	Chaetoceros socialis	['Chaetoceros socialis']	163503	1	18	1	0	0	0	0	0	1	0	0	0	0	0	0	0	0
Chaetoceros sp. 7BOF	1	aaacgtaactgctgccactatggaagaagtttacaagcgtgcagaatatgctaagcaagtaggttctgtagtaatc	KC969706	species	Chaetocerotales	Chaetocerotaceae	Chaetoceros	Chaetoceros sp. 7BOF	['Chaetoceros sp. 7BOF']	1366282	1	8858	1	0	0	0	0	0	0	0	0	0	0	1	0	0	0
Cylindrotheca	0.934211	aaatgttactgctgcgacaatggaagaaatctacaaacgttcagagtatgcgaaagaagtaggttctatcgttatt	JX970999	genus	Bacillariales	Bacillariaceae	Cylindrotheca	Cylindrotheca	['Cylindrotheca closterium', 'Cylindrotheca sp. 2BOF', 'Cylindrotheca sp. 3BOF', 'Cylindrotheca closterium lineage V', 'Cylindrotheca sp. lineage IV']	2852	12	304	1	0	0	0	1	0	0	0	0	0	0	0	0	0	0
Cylindrotheca	0.986842	aaacgttactgctgctactatggaagaagtatacaaacgttctgagtatgctaaagaagtaggttcgattgttatc	KP400288	genus	Bacillariales	Bacillariaceae	Cylindrotheca	Cylindrotheca	['Cylindrotheca closterium', 'Cylindrotheca sp. 2BOF']	2852	2	183	1	0	0	0	1	0	0	0	0	0	0	0	0	0	0
Eukaryota	0.960526	aaacatcacagcagctactatggaagaagtttacaagcgtgctgagtatgctaaagctattggttctgtagttgtt	AY257111	superkingdom	NA	NA	NA	Eukaryota	['Strombidium sp. HZ-2009b', 'Thalassiosira antarctica', 'Fragilaria sp. HGC-2007-2', 'Licmophora aff. ehrenbergii MPA-2015']	2759	4	48	1	0	0	1	0	0	0	0	0	0	0	0	0	0	0
Eukaryota	0.935065	aaacattactgctgcgacaatggaagaagtatacaaacgtgctgagtatgctaaagaagttggttctgtaattatc	HG530054	superkingdom	NA	NA	NA	Eukaryota	[]	2759	39	6	1	0	0	0	1	0	0	0	0	0	0	0	0	0	0
Fragilaria	0.986842	aaacatcactgctgctactatggaagaactttacaaacgtggtgagtatgctaaagctgtaggttctgtaatcgtt	AM710473	genus	Fragilariales	Fragilariaceae	Fragilaria	Fragilaria	['Fragilaria bidens', 'Fragilaria perminuta']	33644	3	5623	1	0	0	0	1	0	0	0	0	0	0	0	0	0	0
Haslea avium	1	aaacatcacagcagctactatggaagaagtttacaagcgtgctgagtacgctaaaatggtaggttctatcgtagtt	KY937695	species	Naviculales	Naviculaceae	Haslea	Haslea avium	['Haslea avium']	2018708	1	70594	2	0	0	0	1	0	0	0	0	0	1	0	0	0	0
Haslea avium	0.986842	aaacatcacagcagctactatggaagaagtatacaagcgtgctgagtacgctaaaatggtaggttctatcgtagtt	KY937695	species	Naviculales	Naviculaceae	Haslea	Haslea avium	['Haslea avium']	2018708	1	21	1	0	0	0	0	0	0	0	0	0	0	0	1	0	0
Haslea avium	0.986842	aaacataacagcagctactatggaagaagtttacaagcgtgctgagtacgctaaaatggtaggttctatcgtagtt	KY937695	species	Naviculales	Naviculaceae	Haslea	Haslea avium	['Haslea avium']	2018708	1	18	1	0	0	0	1	0	0	0	0	0	0	0	0	0	0
Haslea avium	0.921053	aaatgtaactgctgccactatggaagaagtttacaagcgtgctgagtacgctaaaatggtaggttctatcgtagtt	KY937695	species	Naviculales	Naviculaceae	Haslea	Haslea avium	['Haslea avium']	2018708	1	9	1	0	0	0	0	0	0	1	0	0	0	0	0	0	0
Minidiscus trioculatus	0.986842	aaacgttacagctgctacgatggaagaaatctacaagcgtgctgaatatgctaaagctgttggttctatcgttatt	DQ514793	species	Thalassiosirales	Thalassiosiraceae	Minidiscus	Minidiscus trioculatus	['Minidiscus trioculatus']	265540	1	45933	1	0	0	0	1	0	0	0	0	0	0	0	0	0	0
Nitzschia	0.986842	aaacgttacaggtgctacaatggaagacgtttacgaacgttctgagtacgctaaagaagtaggttctgtaattatc	FN557026	genus	Bacillariales	Bacillariaceae	Nitzschia	Nitzschia	['Nitzschia palea', 'Nitzschia capitellata']	2857	8	46550	1	0	0	0	0	1	0	0	0	0	0	0	0	0	0
Nitzschia cf. frigida	0.935065	aaacattactgctgcgacaatggaagaagttatcaagcgtgctgagtacgctaaagaagtaggttctgtaattatc	MH064110	species	Bacillariales	Bacillariaceae	Nitzschia	Nitzschia cf. frigida	['Nitzschia cf. frigida']	2220034	1	148	1	0	0	0	0	0	1	0	0	0	0	0	0	0	0
Nitzschia cf. frigida	0.935065	aaacgttactgctgcgacaatggaagaagttatcaaacgtgctgagtacgctaaagaagtaggttctgtaattatc	MH064110	species	Bacillariales	Bacillariaceae	Nitzschia	Nitzschia cf. frigida	['Nitzschia cf. frigida']	2220034	1	103	1	0	0	0	0	0	0	1	0	0	0	0	0	0	0
Nitzschia cf. frigida	0.935065	aaactttactgctgcgacaatggaagaagttatcaagcgtgctgagtacgctaaagaagtaggttctgtaattatc	MH064110	species	Bacillariales	Bacillariaceae	Nitzschia	Nitzschia cf. frigida	['Nitzschia cf. frigida']	2220034	1	42	1	0	0	0	0	1	0	0	0	0	0	0	0	0	0
Nitzschia cf. frigida	0.935065	aaacgttacagctgcgacaatggaagaagttatcaagcgtgctgagtacgctaaagaagtaggttctgtaattatc	MH064110	species	Bacillariales	Bacillariaceae	Nitzschia	Nitzschia cf. frigida	['Nitzschia cf. frigida']	2220034	1	37	1	0	0	0	0	0	0	0	0	0	0	0	0	0	1
Nitzschia cf. paleacea	0.960526	aaacgttacttctgctactatggaagaagtatacaaacgtgctgagtacgctaaagaagttggttctgtaattatc	KY320319	species	Bacillariales	Bacillariaceae	Nitzschia	Nitzschia cf. paleacea	['Nitzschia cf. paleacea']	2014780	1	43765	3	0	0	0	2	0	0	0	0	0	0	1	0	0	0
Nitzschia cf. paleacea	0.947368	aaacattacttctgctactatggaagaagtatacaaacgtgctgagtacgctaaagaagttggttctgtaattatc	KY320319	species	Bacillariales	Bacillariaceae	Nitzschia	Nitzschia cf. paleacea	['Nitzschia cf. paleacea']	2014780	1	42	1	0	0	0	1	0	0	0	0	0	0	0	0	0	0
Nitzschia sp. 1BOF	0.974026	aaacgttacagctgctactatggaagaagtatacaaacgtgctgagtatgctaaagaagtaggttctatcgttatc	KC969783	species	Bacillariales	Bacillariaceae	Nitzschia	Nitzschia sp. 1BOF	['Nitzschia sp. 1BOF']	1366336	1	18	1	0	0	0	1	0	0	0	0	0	0	0	0	0	0
Paralia	0.922078	aaacatcacagctgcaacaatggaagaagtttataaacgtggtgattatgctaaacaagttggttctatcgttgtg	KP150034	genus	Paraliales	Paraliaceae	Paralia	Paralia	['Paralia guyana']	216907	3	7	1	0	0	0	0	0	0	0	0	0	1	0	0	0	0
Porosira	1	aaacgttacagctgccactatggaagaagtatacaaacgtgctgagtatgctagagtagttggttctgttgttgta	DQ108387	genus	Thalassiosirales	Thalassiosiraceae	Porosira	Porosira	[]	49259	1	632634	10	0	0	0	0	0	2	1	1	0	1	2	0	0	3
Porosira	0.947368	aaacattactgctgcgacaatggaagaagtatacaaacgtgctgagtatgctagagtagttggttctgttgttgta	DQ108387	genus	Thalassiosirales	Thalassiosiraceae	Porosira	Porosira	[]	49259	1	590	3	0	0	1	0	0	0	0	0	0	0	1	0	1	0
Porosira	0.986842	aaacgttactgctgccactatggaagaagtatacaaacgtgctgagtatgctagagtagttggttctgttgttgta	DQ108387	genus	Thalassiosirales	Thalassiosiraceae	Porosira	Porosira	[]	49259	1	316	2	0	0	0	0	0	1	0	1	0	0	0	0	0	0
Porosira	0.960526	aaacgttactgcagctactatggaagaagtatacaaacgtgctgagtatgctagagtagttggttctgttgttgta	DQ108387	genus	Thalassiosirales	Thalassiosiraceae	Porosira	Porosira	[]	49259	1	297	2	0	0	0	0	0	0	1	0	0	0	1	0	0	0
Porosira	0.986842	aaacgttacagctgcgactatggaagaagtatacaaacgtgctgagtatgctagagtagttggttctgttgttgta	DQ108387	genus	Thalassiosirales	Thalassiosiraceae	Porosira	Porosira	[]	49259	1	186	2	0	0	0	0	1	0	0	1	0	0	0	0	0	0
Porosira	0.973684	aaacattacagctgcgactatggaagaagtatacaaacgtgctgagtatgctagagtagttggttctgttgttgta	DQ108387	genus	Thalassiosirales	Thalassiosiraceae	Porosira	Porosira	[]	49259	1	21	2	0	0	0	1	0	0	0	0	0	0	1	0	0	0
Porosira	0.986842	aaacattacagctgccactatggaagaagtatacaaacgtgctgagtatgctagagtagttggttctgttgttgta	DQ108387	genus	Thalassiosirales	Thalassiosiraceae	Porosira	Porosira	[]	49259	1	1889	1	0	0	0	0	0	0	1	0	0	0	0	0	0	0
Porosira	0.986842	aaacgttacagctgccactatggaagaagtatacaaacgtgctgagtatgctggagtagttggttctgttgttgta	DQ108387	genus	Thalassiosirales	Thalassiosiraceae	Porosira	Porosira	[]	49259	1	675	1	0	0	0	1	0	0	0	0	0	0	0	0	0	0
Porosira	0.973684	aaacgttacagctgccactatggaagaagtatacaaacgtgctgagtatgctagagtagttggttctgtagttgtt	DQ108387	genus	Thalassiosirales	Thalassiosiraceae	Porosira	Porosira	[]	49259	1	560	1	0	0	1	0	0	0	0	0	0	0	0	0	0	0
Porosira	0.960526	aaacattacagctgcgacaatggaagaagtatacaaacgtgctgagtatgctagagtagttggttctgttgttgta	DQ108387	genus	Thalassiosirales	Thalassiosiraceae	Porosira	Porosira	[]	49259	1	402	1	0	0	1	0	0	0	0	0	0	0	0	0	0	0
Porosira	0.986842	aaacgttacagctgccactatggaagaagtatacaaacgtgctgagtatgctagagtagttggttctgtagttgta	DQ108387	genus	Thalassiosirales	Thalassiosiraceae	Porosira	Porosira	[]	49259	1	240	1	0	0	0	1	0	0	0	0	0	0	0	0	0	0
Porosira	0.986842	aaacgttacagctgccacaatggaagaagtatacaaacgtgctgagtatgctagagtagttggttctgttgttgta	DQ108387	genus	Thalassiosirales	Thalassiosiraceae	Porosira	Porosira	[]	49259	1	118	1	0	0	0	0	1	0	0	0	0	0	0	0	0	0
Porosira	0.973684	aaacgtaactgctgccactatggaagaagtatacaaacgtgctgagtatgctagagtagttggttctgttgttgta	DQ108387	genus	Thalassiosirales	Thalassiosiraceae	Porosira	Porosira	[]	49259	1	117	1	0	0	0	1	0	0	0	0	0	0	0	0	0	0
Porosira	0.948052	aaacgttacagctgccactatggaagaagtatacaaacgtgctgagtatgctaaagctattggttctgtagttgta	DQ108387	genus	Thalassiosirales	Thalassiosiraceae	Porosira	Porosira	[]	49259	1	61	1	0	0	0	1	0	0	0	0	0	0	0	0	0	0
Porosira	0.973684	aaacattactgctgccactatggaagaagtatacaaacgtgctgagtatgctagagtagttggttctgttgttgta	DQ108387	genus	Thalassiosirales	Thalassiosiraceae	Porosira	Porosira	[]	49259	1	55	1	0	0	0	0	0	0	0	0	0	0	0	0	0	1
Porosira	0.948052	aaacgttacagctgccactatggaagaagtatacaaacgtgctgagtatgctagagctattggttctgtagttgtt	DQ108387	genus	Thalassiosirales	Thalassiosiraceae	Porosira	Porosira	[]	49259	1	25	1	0	0	0	0	0	0	0	0	0	0	0	0	1	0
Porosira	0.947368	aaacatcactgctgctactatggaagaagtatacaaacgtgctgagtatgctagagtagttggttctgttgttgta	DQ108387	genus	Thalassiosirales	Thalassiosiraceae	Porosira	Porosira	[]	49259	1	6	1	0	0	0	0	0	0	0	0	0	0	0	1	0	0
root	NA	aaacgttacagcttcgacttacgaagaagtacttaaacgtatggaatacgctaaagacgtaggttctatcgttgtt	NA	no rank	NA	NA	NA	root	NA	1	0	24793	2	0	0	0	0	0	0	1	0	0	0	1	0	0	0
root	NA	aaacatcacagctgctactatggaagaagtgtacaagcgtgctgactatgctaaagctgttggttctgttgtaatc	NA	no rank	NA	NA	NA	root	NA	1	0	17	1	0	0	0	0	0	0	0	0	0	0	0	0	0	1
root	NA	aaacgttacagctgctacttgggaagaagtacttaaacgttgtgagtatgcaaaacaagtaggttctatagttgtt	NA	no rank	NA	NA	NA	root	NA	1	0	2	1	0	0	0	0	0	0	0	0	0	0	0	0	1	0
root	NA	aaacattactgcagctacttatgaagaagttctaaaacgtgctgaatatgctaaatctgttggttctatcgttgtc	NA	no rank	NA	NA	NA	root	NA	1	0	1	1	0	0	0	0	0	0	0	0	0	0	0	0	0	1
root	NA	aaacattactgcagctacttatgaagaagttttaaaacgtgctgaatatgctaaatctgttggttctatcgttgta	NA	no rank	NA	NA	NA	root	NA	1	0	1	1	0	0	0	0	0	0	0	0	0	1	0	0	0	0
root	NA	aaacattactgcagctacttatgaagaagttttaaaacgtgctgaatatgctaaatctgttggttctatagttgtc	NA	no rank	NA	NA	NA	root	NA	1	0	1	1	0	0	0	0	0	0	0	0	0	0	0	0	0	1
Skeletonema	0.986842	aaacattacagctgcgacaatggaagaagtatacaaacgtgctgagtatgctaaagctgttggttctatcgttgtt	DQ514817	genus	Thalassiosirales	Skeletonemataceae	Skeletonema	Skeletonema	['Skeletonema sp.', 'Skeletonema costatum']	2842	6	144512	3	0	0	0	1	0	0	0	0	0	2	0	0	0	0
Skeletonema	1	aaacattacagctgcaacaatggaagaagtatacaaacgtgctgagtatgctaaagctgttggttctatcgttgtt	DQ514817	genus	Thalassiosirales	Skeletonemataceae	Skeletonema	Skeletonema	[]	2842	1	80	1	0	0	0	1	0	0	0	0	0	0	0	0	0	0
Skeletonema	0.986842	aaacattacagctgctactatggaagaagtatacaaacgtgctgagtatgctaaagctgttggttctatcgttgtt	JN159931	genus	Thalassiosirales	Skeletonemataceae	Skeletonema	Skeletonema	['Skeletonema costatum']	2842	3	44	1	0	0	0	0	0	0	0	0	0	1	0	0	0	0
Skeletonema costatum	0.986842	aaacattactgctgcgacaatggaagaagtatacaaacgtgctgagtatgctaaagctgttggttctatcgttgtt	AF015569	species	Thalassiosirales	Skeletonemataceae	Skeletonema	Skeletonema costatum	['Skeletonema costatum']	2843	2	541	4	0	0	0	0	0	0	0	2	0	0	1	0	0	1
Skeletonema subsalsum	0.960526	aaacattacagctgcgacaatggaagaaacatacaaacgtgctgagtatgctaaagctattggttctatcgttgtt	DQ514820	species	Thalassiosirales	Skeletonemataceae	Skeletonema	Skeletonema subsalsum	['Skeletonema subsalsum']	216763	1	79373	2	0	0	0	1	0	0	0	0	0	0	0	1	0	0
Stramenopiles	0.921053	aaacattacagctggtacaatggaagaagtttacgaacgtgctgaatacgctagatcagttggtacagttattgta	AF372696	no rank	NA	NA	NA	Stramenopiles	['Triparma pacifica', 'Stauroneis schmidiae']	33634	3	30497	1	0	0	0	0	0	0	0	0	0	1	0	0	0	0
Synedra	1	aaacgttacagctgcaactatggaagaagtatacaaacgtgctgagtatgctaaagctgtaggttctgtaatcatc	HQ912485	genus	Fragilariales	Fragilariaceae	Synedra	Synedra	[]	191584	1	1721	1	0	0	0	0	0	0	0	0	0	0	0	0	0	1
Thalassiosira	0.986842	aaacattactgctgcgacaatggaagaagtatacaaacgtgctgagtatgctaaagctattggttctgtagttgtt	DQ514808	genus	Thalassiosirales	Thalassiosiraceae	Thalassiosira	Thalassiosira	['Thalassiosira sp. 1 SEH-2013']	35127	2	1231778	110	6	3	6	8	1	17	7	11	1	13	17	6	12	2
Thalassiosira	1	aaacattacagctgcgacaatggaagaagtatacaaacgtgctgagtatgctaaagctattggttctgtagttgtt	DQ514808	genus	Thalassiosirales	Thalassiosiraceae	Thalassiosira	Thalassiosira	[]	35127	1	365220	27	1	2	2	2	0	6	1	4	0	3	1	1	2	2
Thalassiosira	0.973684	aaacattactgctgcgacgatggaagaagtatacaaacgtgctgagtatgctaaagctattggttctgtagttgtt	DQ514808	genus	Thalassiosirales	Thalassiosiraceae	Thalassiosira	Thalassiosira	['Thalassiosira sp. 11BOF', 'Thalassiosira sp. 1 SEH-2013']	35127	5	93102	9	0	3	0	1	0	1	1	0	0	1	1	0	1	0
Thalassiosira	0.986842	aaacattacagctgctactatggaagaagtatacaaacgtgctgagtatgctaaagctattggttctgtagttgtt	DQ514795	genus	Thalassiosirales	Thalassiosiraceae	Thalassiosira	Thalassiosira	['Thalassiosira antarctica', 'Thalassiosira angulata']	35127	2	676	5	0	1	0	0	0	2	0	2	0	0	0	0	0	0
Thalassiosira	0.986842	aaacattacagctgctacaatggaagaagtatacaaacgtgctgagtatgctaaagctattggttctgtagttgtt	DQ514803	genus	Thalassiosirales	Thalassiosiraceae	Thalassiosira	Thalassiosira	['Thalassiosira sp. 11BOF', 'Thalassiosira minuscula']	35127	3	286	4	0	0	0	1	0	0	0	0	0	1	1	0	0	1
Thalassiosira	0.973684	aaacattactgctgcgacaatggaagaagtatacaaacgtgctgagtatgctaaagctattggttctatagttgtt	DQ514808	genus	Thalassiosirales	Thalassiosiraceae	Thalassiosira	Thalassiosira	['Thalassiosira sp. 11BOF', 'Thalassiosira sp. 1 SEH-2013']	35127	5	743	3	0	0	0	0	1	1	0	0	0	0	0	0	1	0
Thalassiosira	0.986842	aaacattactgctgctactatggaagaaacatacaaacgtgctgagtatgctaaagccattggttctgtagttgtt	DQ514788	genus	Thalassiosirales	Thalassiosiraceae	Thalassiosira	Thalassiosira	[]	35127	1	5	3	0	0	1	0	0	0	0	0	0	1	1	0	0	0
Thalassiosira	0.986842	aaacattacagctgcgacaatggaagaagtatacaaacgtgctgagtatgctaaagccattggttctgtagttgtt	DQ514808	genus	Thalassiosirales	Thalassiosiraceae	Thalassiosira	Thalassiosira	[]	35127	1	533	2	0	0	0	0	0	0	0	0	0	2	0	0	0	0
Thalassiosira	1	aaacattacagctgctactatggaagaaacatacaaacgtgctgagtatgctaaagccattggttctgtagttgtt	DQ514788	genus	Thalassiosirales	Thalassiosiraceae	Thalassiosira	Thalassiosira	[]	35127	1	410	2	0	0	1	1	0	0	0	0	0	0	0	0	0	0
Thalassiosira	0.986842	aaacattacagctgcgactatggaagaagtatacaaacgtgctgagtatgctaaagctattggttctgtagttgtt	DQ514808	genus	Thalassiosirales	Thalassiosiraceae	Thalassiosira	Thalassiosira	[]	35127	1	142	2	0	1	0	0	0	0	0	0	0	1	0	0	0	0
Thalassiosira	0.947368	aaacgtaactgcagcgactatggaagaagtatacaaacgtgctgagtatgctaaagctattggttctgtagttgtt	KC802088	genus	Thalassiosirales	Thalassiosiraceae	Thalassiosira	Thalassiosira	['Thalassiosira sundarbana', 'Thalassiosira sp. 10BOF']	35127	2	133	2	0	0	1	1	0	0	0	0	0	0	0	0	0	0
Thalassiosira	0.973684	aaacattactgcagctactatggaagaagtatacaaacgtgctgagtatgctaaagctattggttctgtagttgtt	KC969854	genus	Thalassiosirales	Thalassiosiraceae	Thalassiosira	Thalassiosira	['Thalassiosira sp. 11BOF', 'Thalassiosira minuscula']	35127	3	21	2	0	0	1	0	0	0	0	0	0	1	0	0	0	0
Thalassiosira	0.973684	aaacattactgctgcgacaatggaagaagtatacaaacgtgctgagtatgctaaagctactggttctgtagttgtt	DQ514808	genus	Thalassiosirales	Thalassiosiraceae	Thalassiosira	Thalassiosira	['Thalassiosira sp. 11BOF', 'Thalassiosira sp. 1 SEH-2013']	35127	5	8634	1	0	0	0	0	0	1	0	0	0	0	0	0	0	0
Thalassiosira	0.973684	aaacattactgctgcgacaatggaagaagtatacaaacgtgctgagtatgctaaagctattggttctgtggttgtt	DQ514808	genus	Thalassiosirales	Thalassiosiraceae	Thalassiosira	Thalassiosira	['Thalassiosira sp. 11BOF', 'Thalassiosira sp. 1 SEH-2013']	35127	5	1547	1	0	0	0	0	0	0	0	1	0	0	0	0	0	0
Thalassiosira	0.973684	aaacattactgctgcgacaatggaagaagtatacaaacgtgctgagtacgctaaagctattggttctgtagttgtt	DQ514808	genus	Thalassiosirales	Thalassiosiraceae	Thalassiosira	Thalassiosira	['Thalassiosira sp. 11BOF', 'Thalassiosira sp. 1 SEH-2013']	35127	5	1499	1	0	0	0	0	0	0	1	0	0	0	0	0	0	0
Thalassiosira	0.973684	aaacgttactgctgcgacaatggaagaagtatacaaacgtgctgagtatgctaaagctattggttctgtagttgtt	DQ514808	genus	Thalassiosirales	Thalassiosiraceae	Thalassiosira	Thalassiosira	['Thalassiosira sp. 11BOF', 'Thalassiosira sp. 1 SEH-2013']	35127	5	1252	1	0	0	0	0	0	0	0	0	0	0	0	0	0	1
Thalassiosira	0.986842	aaacattacagctgcgacaatggaagaagtatacaaacgtgctaagtatgctaaagctattggttctgtagttgtt	DQ514808	genus	Thalassiosirales	Thalassiosiraceae	Thalassiosira	Thalassiosira	[]	35127	1	1117	1	0	0	0	0	0	0	0	0	0	0	0	0	1	0
Thalassiosira	0.973684	aaacattactgctgcgacaatggaagaagtatacaaacgtgctgagtatgctaaagctattggttctgcagttgtt	DQ514808	genus	Thalassiosirales	Thalassiosiraceae	Thalassiosira	Thalassiosira	['Thalassiosira sp. 11BOF', 'Thalassiosira sp. 1 SEH-2013']	35127	5	1057	1	0	0	0	0	0	0	0	0	0	1	0	0	0	0
Thalassiosira	0.986842	aaacattacagctgcgacaatggaagaggtatacaaacgtgctgagtatgctaaagctattggttctgtagttgtt	DQ514808	genus	Thalassiosirales	Thalassiosiraceae	Thalassiosira	Thalassiosira	[]	35127	1	656	1	0	0	0	0	0	0	0	0	0	1	0	0	0	0
Thalassiosira	0.986842	aaacattacagctgcgacaatggaagaagtatacagacgtgctgagtatgctaaagctattggttctgtagttgtt	DQ514808	genus	Thalassiosirales	Thalassiosiraceae	Thalassiosira	Thalassiosira	[]	35127	1	584	1	0	0	0	0	0	0	0	1	0	0	0	0	0	0
Thalassiosira	0.973684	aaacattactgctgcgacaatggaagaagtatacaaacgtgctgagtatgctaaagctattggttctgtaattgtt	DQ514803	genus	Thalassiosirales	Thalassiosiraceae	Thalassiosira	Thalassiosira	['Thalassiosira sp. 11BOF', 'Thalassiosira sp. 1 SEH-2013', 'Thalassiosira minuscula']	35127	7	553	1	0	1	0	0	0	0	0	0	0	0	0	0	0	0
Thalassiosira	0.973684	aaacattactgctgcgactatggaagaagtatacaaacgtgctgagtatgctaaagctattggttctgtagttgtt	DQ514808	genus	Thalassiosirales	Thalassiosiraceae	Thalassiosira	Thalassiosira	['Thalassiosira sp. 11BOF', 'Thalassiosira sp. 1 SEH-2013']	35127	5	549	1	0	0	0	1	0	0	0	0	0	0	0	0	0	0
Thalassiosira	0.986842	aaacattacagctgcgacaatggaagaagtatacaaacgtgctgagtatgctaaagctgttggttctgtagttgtt	DQ514808	genus	Thalassiosirales	Thalassiosiraceae	Thalassiosira	Thalassiosira	[]	35127	1	496	1	0	0	0	0	0	0	0	0	0	0	0	0	0	1
Thalassiosira	0.973684	aaacattacagcggctactatggaagaagtatacaaacgtgctgagtatgctaaagctattggttctgtagttgtt	DQ514795	genus	Thalassiosirales	Thalassiosiraceae	Thalassiosira	Thalassiosira	['Thalassiosira minuscula', 'Thalassiosira antarctica', 'Thalassiosira sp. 11BOF', 'Thalassiosira angulata']	35127	5	386	1	0	0	0	0	1	0	0	0	0	0	0	0	0	0
Thalassiosira	0.973684	aaacattactgctgcgacaatggaagaagtatacaaacgtgctgagtatgctaaagctattggttctttagttgtt	DQ514808	genus	Thalassiosirales	Thalassiosiraceae	Thalassiosira	Thalassiosira	['Thalassiosira sp. 11BOF', 'Thalassiosira sp. 1 SEH-2013']	35127	5	374	1	0	0	0	0	0	0	0	1	0	0	0	0	0	0
Thalassiosira	0.973684	aaacattactgctgcgacaatggaagaagtatacaaacgtgctgagtatgctaaagctattggtactgtagttgtt	DQ514808	genus	Thalassiosirales	Thalassiosiraceae	Thalassiosira	Thalassiosira	['Thalassiosira sp. 11BOF', 'Thalassiosira sp. 1 SEH-2013']	35127	5	326	1	0	0	0	0	0	0	0	0	0	0	0	0	1	0
Thalassiosira	0.973684	aaacgttacagctgctacaatggaagaagtatacaaacgtgctgagtatgctaaagctattggttctgtagttgtt	DQ514803	genus	Thalassiosirales	Thalassiosiraceae	Thalassiosira	Thalassiosira	['Thalassiosira sp. 11BOF', 'Thalassiosira sp. 1 SEH-2013', 'Thalassiosira minuscula']	35127	8	293	1	0	0	0	0	0	1	0	0	0	0	0	0	0	0
Thalassiosira	0.973684	aaacattactgctgcgacaatggaagatgtatacaaacgtgctgagtatgctaaagctattggttctgtagttgtt	DQ514808	genus	Thalassiosirales	Thalassiosiraceae	Thalassiosira	Thalassiosira	['Thalassiosira sp. 11BOF', 'Thalassiosira sp. 1 SEH-2013']	35127	5	287	1	0	0	0	0	0	0	0	0	0	0	1	0	0	0
Thalassiosira	0.973684	aaacattactgctgcgacaatcgaagaagtatacaaacgtgctgagtatgctaaagctattggttctgtagttgtt	DQ514808	genus	Thalassiosirales	Thalassiosiraceae	Thalassiosira	Thalassiosira	['Thalassiosira sp. 11BOF', 'Thalassiosira sp. 1 SEH-2013']	35127	5	236	1	0	0	0	0	0	1	0	0	0	0	0	0	0	0
Thalassiosira	0.973684	aaacgttacagctgctactatggaagaagtatacaaacgtgctgagtatgctaaagctattggttctgtagttgtt	DQ514795	genus	Thalassiosirales	Thalassiosiraceae	Thalassiosira	Thalassiosira	['Thalassiosira sp. 10BOF', 'Thalassiosira antarctica', 'Thalassiosira angulata']	35127	3	225	1	0	0	0	0	0	1	0	0	0	0	0	0	0	0
Thalassiosira	0.973684	aaacatcacagcggctactatggaagaagtatacaaacgtgctgagtatgctaaagctattggttctatagttgtt	DQ514795	genus	Thalassiosirales	Thalassiosiraceae	Thalassiosira	Thalassiosira	['Thalassiosira antarctica', 'Thalassiosira angulata']	35127	2	199	1	0	0	0	0	0	0	0	1	0	0	0	0	0	0
Thalassiosira	0.986842	aaacattacagctgcgacaatggaagaagtatacaaacgtgctgagtatgataaagctattggttctgtagttgtt	DQ514808	genus	Thalassiosirales	Thalassiosiraceae	Thalassiosira	Thalassiosira	[]	35127	1	181	1	0	0	0	0	0	0	0	0	0	0	1	0	0	0
Thalassiosira	0.986842	aaacattacagctgcgacaatggaagaattatacaaacgtgctgagtatgctaaagctattggttctgtagttgtt	DQ514808	genus	Thalassiosirales	Thalassiosiraceae	Thalassiosira	Thalassiosira	[]	35127	1	90	1	0	0	0	0	0	1	0	0	0	0	0	0	0	0
Thalassiosira	0.986842	aaacataacagctgcgacaatggaagaagtatacaaacgtgctgagtatgctaaagctattggttctgtagttgtt	DQ514808	genus	Thalassiosirales	Thalassiosiraceae	Thalassiosira	Thalassiosira	[]	35127	1	78	1	0	0	0	0	0	0	0	0	0	0	1	0	0	0
Thalassiosira	0.947368	aaacgtaactgctgccactatggaagaagtttacaaacgtgctgagtatgctaaagctattggttctgtagttgtt	KC802088	genus	Thalassiosirales	Thalassiosiraceae	Thalassiosira	Thalassiosira	['Thalassiosira sundarbana', 'Thalassiosira sp. 10BOF']	35127	2	73	1	0	0	1	0	0	0	0	0	0	0	0	0	0	0
Thalassiosira	0.973684	aaacattactgctgcgacaatggaagaagtatacaaacgtgctgagtatgctaaagcgattggttctgtagttgtt	DQ514808	genus	Thalassiosirales	Thalassiosiraceae	Thalassiosira	Thalassiosira	['Thalassiosira sp. 11BOF', 'Thalassiosira sp. 1 SEH-2013']	35127	5	64	1	0	0	0	0	0	0	0	0	0	0	0	1	0	0
Thalassiosira	0.986842	aaacattacagctgcgacaatggaagaagtatacaaacgtgctgagtatgctaaagctattggttctgtcgttgtt	DQ514808	genus	Thalassiosirales	Thalassiosiraceae	Thalassiosira	Thalassiosira	[]	35127	1	43	1	0	0	0	1	0	0	0	0	0	0	0	0	0	0
Thalassiosira	0.973684	aaacgttacagctgccacaatggaagaagtatacaaacgtgctgagtatgctaaagctattggttctgtagttgtt	DQ514808	genus	Thalassiosirales	Thalassiosiraceae	Thalassiosira	Thalassiosira	['Thalassiosira sp. 11BOF', 'Thalassiosira sp. 1 SEH-2013']	35127	3	30	1	0	0	0	0	0	1	0	0	0	0	0	0	0	0
Thalassiosira	0.973684	aaacattacagctgccactatggaagaagtatacaaacgtgctgagtatgctaaagctattggttctgtagttgtt	DQ514795	genus	Thalassiosirales	Thalassiosiraceae	Thalassiosira	Thalassiosira	['Thalassiosira sp. 11BOF', 'Thalassiosira antarctica', 'Thalassiosira sp. 1 SEH-2013', 'Thalassiosira angulata']	35127	5	22	1	0	0	0	0	0	1	0	0	0	0	0	0	0	0
Thalassiosira	0.974026	aaaacattactgctgcgacaatggaagaagtatacaaacgtgctgagtatgctaaagctattggttctgtagttgtt	DQ514808	genus	Thalassiosirales	Thalassiosiraceae	Thalassiosira	Thalassiosira	['Thalassiosira sp. 1 SEH-2013']	35127	2	13	1	0	0	0	0	0	0	0	0	0	0	0	0	1	0
Thalassiosira	0.973684	taacattactgctgctactatggaagaagtatacaaacgtgctgagtatgctaaagctattggttctatagttgtt	KC985686	genus	Thalassiosirales	Thalassiosiraceae	Thalassiosira	Thalassiosira	['Thalassiosira angulata', 'Thalassiosira nordenskioeldii']	35127	2	13	1	0	0	1	0	0	0	0	0	0	0	0	0	0	0
Thalassiosira	0.948052	aaacattacagctgcgacaatggaagaagtatacaaacgtgctgagtatgctaaagtagttggttctgttgttgta	DQ514808	genus	Thalassiosirales	Thalassiosiraceae	Thalassiosira	Thalassiosira	['Thalassiosira sp. 11BOF', 'Thalassiosira sp. 1 SEH-2013']	35127	3	9	1	0	0	0	0	0	1	0	0	0	0	0	0	0	0
Thalassiosira	0.960526	aaacattactgctgcgactatggaagaagtatacaaacgtgctgagtatgctaaagcttttggttctgtagttgtt	DQ514808	genus	Thalassiosirales	Thalassiosiraceae	Thalassiosira	Thalassiosira	['Thalassiosira sp. 11BOF', 'Thalassiosira sp. 1 SEH-2013']	35127	5	7	1	0	0	0	0	0	0	0	0	0	0	0	0	1	0
Thalassiosira	0.973684	taacattactgcagctacaatggaagaagtatacaaacgtgctgagtatgctaaagctattggttctgtagttgtt	KC969854	genus	Thalassiosirales	Thalassiosiraceae	Thalassiosira	Thalassiosira	['Thalassiosira sp. 11BOF', 'Thalassiosira minuscula']	35127	3	3	1	0	0	0	0	0	0	0	0	0	0	0	0	1	0
Thalassiosira	0.986842	aaacattacagctgctactatggaagaaacatacaaacgtgctgagtatgctaaagctattggttctgtagttgtt	DQ514788	genus	Thalassiosirales	Thalassiosiraceae	Thalassiosira	Thalassiosira	[]	35127	1	1	1	0	0	0	0	0	0	0	0	0	0	0	0	1	0
Thalassiosira	0.986842	aaacatcacagctgctactatggaagaaacatacaaacgtgctgagtatgctaaagccattggttctgtagttgtt	DQ514788	genus	Thalassiosirales	Thalassiosiraceae	Thalassiosira	Thalassiosira	[]	35127	1	1	1	0	0	1	0	0	0	0	0	0	0	0	0	0	0
Thalassiosira	0.986842	aaacattacagcagctactatggaagaaacatacaaacgtgctgagtatgctaaagccattggttctgtagttgtt	DQ514788	genus	Thalassiosirales	Thalassiosiraceae	Thalassiosira	Thalassiosira	[]	35127	1	1	1	0	0	1	0	0	0	0	0	0	0	0	0	0	0
Thalassiosira angulata	0.986842	aaacattactgctgctactatggaagaagtatacaaacgtgctgagtatgctaaagctattggttctatagttgtt	KC985686	species	Thalassiosirales	Thalassiosiraceae	Thalassiosira	Thalassiosira angulata	['Thalassiosira angulata']	291033	1	16	1	0	0	0	1	0	0	0	0	0	0	0	0	0	0
Thalassiosira anguste-lineata	1	aaacatcacagctgctacaatggaagaagtgtacaaacgtgctgaatacgcgaaagctattggttctatcgttgtt	KC985698	species	Thalassiosirales	Thalassiosiraceae	Thalassiosira	Thalassiosira anguste-lineata	['Thalassiosira anguste-lineata']	337180	1	81228	3	0	0	0	2	0	1	0	0	0	0	0	0	0	0
Thalassiosira anguste-lineata	0.986842	aaatatcacagctgctacaatggaagaagtgtacaaacgtgctgaatacgcgaaagctattggttctatcgttgtt	KC985698	species	Thalassiosirales	Thalassiosiraceae	Thalassiosira	Thalassiosira anguste-lineata	['Thalassiosira anguste-lineata']	337180	1	31	1	0	0	0	0	0	0	0	1	0	0	0	0	0	0
Thalassiosira antarctica	0.986842	aaacatcacagcggctactatggaagaagtatacaaacgtgctgagtatgctaaagctattggttctgtagttgtt	DQ514795	species	Thalassiosirales	Thalassiosiraceae	Thalassiosira	Thalassiosira antarctica	['Thalassiosira antarctica']	160265	1	289315	20	0	1	4	0	0	2	1	3	0	6	0	0	1	2
Thalassiosira antarctica	1	aaacatcacagctgctactatggaagaagtatacaaacgtgctgagtatgctaaagctattggttctgtagttgtt	DQ514795	species	Thalassiosirales	Thalassiosiraceae	Thalassiosira	Thalassiosira antarctica	['Thalassiosira antarctica']	160265	1	176398	14	0	0	1	2	0	3	0	3	0	1	0	0	2	2
Thalassiosira antarctica	0.986842	aaacgtcacagctgctactatggaagaagtatacaaacgtgctgagtatgctaaagctattggttctgtagttgtt	DQ514795	species	Thalassiosirales	Thalassiosiraceae	Thalassiosira	Thalassiosira antarctica	['Thalassiosira antarctica']	160265	1	140	2	0	0	0	2	0	0	0	0	0	0	0	0	0	0
Thalassiosira antarctica	0.986842	aaacataacagctgctactatggaagaagtatacaaacgtgctgagtatgctaaagctattggttctgtagttgtt	DQ514795	species	Thalassiosirales	Thalassiosiraceae	Thalassiosira	Thalassiosira antarctica	['Thalassiosira antarctica']	160265	1	118	2	0	0	0	0	0	0	1	0	0	0	0	1	0	0
Thalassiosira antarctica	0.973684	aaacatcacagcggctactacggaagaagtatacaaacgtgctgagtatgctaaagctattggttctgtagttgtt	DQ514795	species	Thalassiosirales	Thalassiosiraceae	Thalassiosira	Thalassiosira antarctica	['Thalassiosira antarctica']	160265	1	354	1	0	0	0	0	0	0	0	0	0	0	0	0	0	1
Thalassiosira antarctica	0.986842	aaacatcacagctgctactatggaagaggtatacaaacgtgctgagtatgctaaagctattggttctgtagttgtt	DQ514795	species	Thalassiosirales	Thalassiosiraceae	Thalassiosira	Thalassiosira antarctica	['Thalassiosira antarctica']	160265	1	300	1	0	0	0	0	0	1	0	0	0	0	0	0	0	0
Thalassiosira antarctica	0.986842	aaacatcacagctgctactatggaagaaatatacaaacgtgctgagtatgctaaagctattggttctgtagttgtt	DQ514795	species	Thalassiosirales	Thalassiosiraceae	Thalassiosira	Thalassiosira antarctica	['Thalassiosira antarctica']	160265	1	262	1	0	0	0	0	1	0	0	0	0	0	0	0	0	0
Thalassiosira antarctica	0.973684	aaacatcacagcggctactatggaagaagtatacaaacgttctgagtatgctaaagctattggttctgtagttgtt	DQ514795	species	Thalassiosirales	Thalassiosiraceae	Thalassiosira	Thalassiosira antarctica	['Thalassiosira antarctica']	160265	1	131	1	0	0	0	1	0	0	0	0	0	0	0	0	0	0
Thalassiosira delicata	0.986842	aaacattactgcagctactatggaagaagtatacaaacgtgctgagtatgctaaaactttaggttctatcgttatc	KC985737	species	Thalassiosirales	Thalassiosiraceae	Thalassiosira	Thalassiosira delicata	['Thalassiosira delicata']	1366863	1	895	1	0	0	0	0	0	1	0	0	0	0	0	0	0	0
Thalassiosira delicata	0.986842	aaacgttacagcagctactatggaagaagtatacaaacgtgctgagtatgctaaaactttaggttctatcgttatc	KC985737	species	Thalassiosirales	Thalassiosiraceae	Thalassiosira	Thalassiosira delicata	['Thalassiosira delicata']	1366863	1	285	1	0	0	0	0	0	1	0	0	0	0	0	0	0	0
Thalassiosira delicata	0.947368	aaacatcacagctgctactatggaagaagtatacaaacgtgctgagtatgctaaaactttaggttctatcgttatc	KC985737	species	Thalassiosirales	Thalassiosiraceae	Thalassiosira	Thalassiosira delicata	['Thalassiosira delicata']	1366863	1	267	1	0	0	0	0	0	0	0	0	0	0	0	0	0	1
Thalassiosira delicata	0.934211	aaacattacagctgcgacaatggaagaagtatacaaacgtgctgagtatgctaaaactttaggttctatcgttatc	KC985737	species	Thalassiosirales	Thalassiosiraceae	Thalassiosira	Thalassiosira delicata	['Thalassiosira delicata']	1366863	1	264	1	0	0	0	0	0	0	0	1	0	0	0	0	0	0
Thalassiosira delicata	0.973684	aaacgttacagctgctactatggaagaagtatacaaacgtgctgagtatgctaaaactttaggttctatcgttatc	KC985737	species	Thalassiosirales	Thalassiosiraceae	Thalassiosira	Thalassiosira delicata	['Thalassiosira delicata']	1366863	1	29	1	0	0	0	0	1	0	0	0	0	0	0	0	0	0
Thalassiosira gravida	1	aaacgttacagctgctacaatggaagaaacatacaagcgtgctgagtatgctaaagccattggttctatcgttgtt	FJ002106	species	Thalassiosirales	Thalassiosiraceae	Thalassiosira	Thalassiosira gravida	['Thalassiosira gravida']	420259	1	304944	7	0	0	0	4	0	0	0	1	0	0	0	1	1	0
Thalassiosira gravida	0.986842	aaacgttacagctgctactatggaagaaacatacaagcgtgctgagtatgctaaagccattggttctatcgttgtt	FJ002106	species	Thalassiosirales	Thalassiosiraceae	Thalassiosira	Thalassiosira gravida	['Thalassiosira gravida']	420259	1	111	2	0	0	0	2	0	0	0	0	0	0	0	0	0	0
Thalassiosira gravida	0.986842	aaacattacagctgctacaatggaagaaacatacaagcgtgctgagtatgctaaagccattggttctatcgttgtt	FJ002106	species	Thalassiosirales	Thalassiosiraceae	Thalassiosira	Thalassiosira gravida	['Thalassiosira gravida']	420259	1	1631	1	0	1	0	0	0	0	0	0	0	0	0	0	0	0
Thalassiosira gravida	0.986842	aaacgttacagctgctacaatgggagaaacatacaagcgtgctgagtatgctaaagccattggttctatcgttgtt	FJ002106	species	Thalassiosirales	Thalassiosiraceae	Thalassiosira	Thalassiosira gravida	['Thalassiosira gravida']	420259	1	478	1	0	0	0	0	0	0	0	0	0	0	0	1	0	0
Thalassiosira gravida	0.986842	aaacgttacagctgctacaatggaagaaacatacaagcgtgctaagtatgctaaagccattggttctatcgttgtt	FJ002106	species	Thalassiosirales	Thalassiosiraceae	Thalassiosira	Thalassiosira gravida	['Thalassiosira gravida']	420259	1	452	1	0	0	0	0	0	0	0	0	0	0	0	0	1	0
Thalassiosira gravida	0.973684	aaacgttacagctgctacaatggaagaaacatacaagcgtgctgagtatgctaaagccattggttctgtagttgtt	FJ002106	species	Thalassiosirales	Thalassiosiraceae	Thalassiosira	Thalassiosira gravida	['Thalassiosira gravida']	420259	1	406	1	0	0	0	0	0	0	0	0	0	1	0	0	0	0
Thalassiosira gravida	0.986842	aaacgttacagctgctacaatggaagaaacatacaagcgtgctgagtatgctaaagccattggttctatagttgtt	FJ002106	species	Thalassiosirales	Thalassiosiraceae	Thalassiosira	Thalassiosira gravida	['Thalassiosira gravida']	420259	1	250	1	0	0	0	1	0	0	0	0	0	0	0	0	0	0
Thalassiosira gravida	0.986842	aaacgttactgctgctacaatggaagaaacatacaagcgtgctgagtatgctaaagccattggttctatcgttgtt	FJ002106	species	Thalassiosirales	Thalassiosiraceae	Thalassiosira	Thalassiosira gravida	['Thalassiosira gravida']	420259	1	112	1	0	0	0	0	0	0	1	0	0	0	0	0	0	0
Thalassiosira nordenskioeldii	0.986842	taacattactgctgctactatggaagaagtatacaaacgtgctgagtatgctaaagctattggttctgtagttgtt	KC985840	species	Thalassiosirales	Thalassiosiraceae	Thalassiosira	Thalassiosira nordenskioeldii	['Thalassiosira nordenskioeldii']	83372	1	945	2	0	0	1	0	0	0	0	0	0	0	1	0	0	0
Thalassiosira nordenskioeldii	1	taacattactgctgctactatggaagaagtatacaaacgtgctgagtatgctaaagctattggttctgtagttgta	KC985840	species	Thalassiosirales	Thalassiosiraceae	Thalassiosira	Thalassiosira nordenskioeldii	['Thalassiosira nordenskioeldii']	83372	1	39944	1	0	0	1	0	0	0	0	0	0	0	0	0	0	0
Thalassiosira sp. 1 SEH-2013	0.986842	aaacattactgttgcgacaatggaagaagtatacaaacgtgctgagtatgctaaagctattggttctgtagttgtt	KC986066	species	Thalassiosirales	Thalassiosiraceae	Thalassiosira	Thalassiosira sp. 1 SEH-2013	['Thalassiosira sp. 1 SEH-2013']	1366901	1	493	1	0	0	0	1	0	0	0	0	0	0	0	0	0	0
Thalassiosira sp. 11BOF	0.986842	aaacattactgcagctacaatggaagaagtatacaaacgtgctgagtatgctaaagctattggttctgtagttgtt	KC969854	species	Thalassiosirales	Thalassiosiraceae	Thalassiosira	Thalassiosira sp. 11BOF	['Thalassiosira sp. 11BOF']	1366305	1	43	2	0	0	1	0	0	1	0	0	0	0	0	0	0	0
Thalassiosira sp. 11BOF	0.986842	aaacattacagcagctactatggaagaagtatacaaacgtgctgagtatgctaaagctattggttctgtagttgtt	KC969854	species	Thalassiosirales	Thalassiosiraceae	Thalassiosira	Thalassiosira sp. 11BOF	['Thalassiosira sp. 11BOF']	1366305	1	12	2	0	0	0	1	0	1	0	0	0	0	0	0	0	0
Thalassiosira sp. 15BOF	1	aaacattacagctgctacgatggaagaaatctacaagcgtgctgaatatgctaaagcaatcggttctatcgttgtt	KC969857	species	Thalassiosirales	Thalassiosiraceae	Thalassiosira	Thalassiosira sp. 15BOF	['Thalassiosira sp. 15BOF']	1366308	1	68336	1	0	0	0	0	0	1	0	0	0	0	0	0	0	0
Thalassiosira sp. JSP-2017a	1	aaacattaccgctaatacgatggaagaaatctataagcgtgctgaatatgctaaagcagttggttctatcgttgtt	KY912626	species	Thalassiosirales	Thalassiosiraceae	Thalassiosira	Thalassiosira sp. JSP-2017a	['Thalassiosira sp. JSP-2017a']	2022772	1	23431	1	0	0	0	0	0	0	1	0	0	0	0	0	0	0
Thalassiosira sp. JSP-2017a	0.986842	aaacattaccgctaatacgatggaagaaatctataagcgtgctgaatatgctaaagcaattggttctatcgttgtt	KY912626	species	Thalassiosirales	Thalassiosiraceae	Thalassiosira	Thalassiosira sp. JSP-2017a	['Thalassiosira sp. JSP-2017a']	2022772	1	8	1	0	0	1	0	0	0	0	0	0	0	0	0	0	0
Thalassiosira sundarbana	0.973684	aaacgttacagctgcaactatggaagaagtatacaaacgtgctgagtatgctaaagctattggttctgtagttgtt	KC802088	species	Thalassiosirales	Thalassiosiraceae	Thalassiosira	Thalassiosira sundarbana	['Thalassiosira sundarbana']	1531304	1	52	1	0	0	0	0	0	0	0	0	0	1	0	0	0	0
Thalassiosiraceae	0.986842	aaacattactgctgctacaatggaagaagtatacaaacgtgctgagtatgctaaagctattggttctgtagttgtt	DQ514798	family	Thalassiosirales	Thalassiosiraceae	NA	Thalassiosiraceae	['Detonula pumila']	29202	2	742	9	0	0	2	0	1	1	0	0	0	2	0	1	1	1
Thalassiosiraceae	0.973684	aaacattactgcggctacaatggaagaagtatacaaacgtgctgagtatgctaaagctattggttctgtagttgtt	DQ514798	family	Thalassiosirales	Thalassiosiraceae	NA	Thalassiosiraceae	['Thalassiosira minuscula', 'Thalassiosira sp. 11BOF', 'Detonula pumila']	29202	5	12297	1	0	0	0	0	1	0	0	0	0	0	0	0	0	0
Thalassiosiraceae	0.973684	aaacattactgctgcgacaatggaagaagtatacaaacgtgctgagtatgctaaagctattggttctgtagttgtg	DQ514808	family	Thalassiosirales	Thalassiosiraceae	NA	Thalassiosiraceae	['Thalassiosira sp. 11BOF', 'Thalassiosira sp. 1 SEH-2013', 'Detonula pumila']	29202	6	329	1	0	0	0	0	0	0	0	0	0	0	0	0	1	0
Thalassiosiraceae	0.973684	aaacataactgctgcgacaatggaagaagtatacaaacgtgctgagtatgctaaagctattggttctgtagttgtt	DQ514798	family	Thalassiosirales	Thalassiosiraceae	NA	Thalassiosiraceae	['Thalassiosira sp. 11BOF', 'Thalassiosira sp. 1 SEH-2013']	29202	6	196	1	1	0	0	0	0	0	0	0	0	0	0	0	0	0
Thalassiosiraceae	0.986842	aaacatcactgctgctactatggaagaagtatacaaacgtgctgagtatgctaaagctattggttctgtagttgtt	DQ514795	family	Thalassiosirales	Thalassiosiraceae	NA	Thalassiosiraceae	['Thalassiosira antarctica']	29202	2	122	1	0	0	0	0	0	1	0	0	0	0	0	0	0	0
Thalassiosiraceae	0.973684	aaacattactgctgctactatggaagaagtatacaaacgtgctgagtatgctaaagctattggttctgtagttgtt	DQ514795	family	Thalassiosirales	Thalassiosiraceae	NA	Thalassiosiraceae	['Thalassiosira antarctica', 'Thalassiosira angulata', 'Thalassiosira nordenskioeldii', 'Detonula pumila']	29202	5	113	1	0	0	0	0	1	0	0	0	0	0	0	0	0	0
Thalassiosirales	0.973684	aaacattacagctgcgacaatggaagaagtatacaaacgtgctgagtatgctaaagctgttggttctatagttgtt	DQ514808	order	Thalassiosirales	NA	NA	Thalassiosirales	['Thalassiosira sp. 11BOF', 'Skeletonema sp.', 'Skeletonema pseudocostatum', 'Thalassiosira sp. 1 SEH-2013', 'Skeletonema costatum']	33847	11	126	2	0	0	0	0	0	1	1	0	0	0	0	0	0	0
Thalassiosirales	0.973684	aaacattacagctgcgacaatggaagaagtatacaaacgtgctgagtatgctaaagctattggttctatcgttgtt	DQ514808	order	Thalassiosirales	NA	NA	Thalassiosirales	['Thalassiosira sp. 11BOF', 'Thalassiosira decipiens', 'Thalassiosira antarctica', 'Skeletonema sp.', 'Skeletonema pseudocostatum', 'Thalassiosira sp. 1 SEH-2013', 'Skeletonema costatum']	33847	16	3556	1	0	0	0	1	0	0	0	0	0	0	0	0	0	0
Triparma	1	aaacattacagctgcaactcaagaagaagtatacaaacgtgctgagtatgctaaagctgttggttctgtaattgtt	KR998415	genus	Parmales	Triparmaceae	Triparma	Triparma	[]	722752	1	131908	8	1	1	3	0	0	1	0	0	0	0	0	0	2	0
Triparma	0.973684	aaacattacagctgcaactcaagaagaagtatacaaacgtgctgagtatgctaaagctattggttctgtagttgtt	KR998415	genus	Parmales	Triparmaceae	Triparma	Triparma	[]	722752	1	1167	1	0	0	0	0	0	0	0	0	0	1	0	0	0	0
Triparma	0.986842	aaacattacagctgcaactcaagaagaagtatacaaacgtgctgagtatgctaaagctgttggttctgtagttgtt	KR998415	genus	Parmales	Triparmaceae	Triparma	Triparma	[]	722752	1	540	1	0	1	0	0	0	0	0	0	0	0	0	0	0	0
Triparma	0.986842	aaacattacagctgcaactaaagaagaagtatacaaacgtgctgagtatgctaaagctgttggttctgtaattgtt	KR998415	genus	Parmales	Triparmaceae	Triparma	Triparma	[]	722752	1	44	1	0	0	0	0	0	0	0	0	0	0	1	0	0	0
