# Supplementary material for: Changes in the composition of marine and sea-ice diatoms derived from sedimentary ancient DNA of the eastern Fram Strait over the past 30 000 years
Source: Copernicus journal article supplement (doi:10.5194/os-16-1017-2020), 2020-09-07
Supplement: Supplementary file 3 [file Supplementary_Figures.docx]

**Supplement to**

**Changes in the composition of marine and sea-ice diatoms derived from sedimentary ancient DNA of the eastern Fram Strait over the past 30,000 years**

By Heike H. Zimmermann, Kathleen R. Stoof-Leichsenring, Stefan Kruse, Juliane Müller, Ruediger Stein, Ralf Tiedemann, and Ulrike Herzschuh

Correspondence to: Heike H. Zimmermann (heike.zimmermann@awi.de) and Ulrike Herzschuh (ulrike.herzschuh@awi.de)

**Supplementary figures**


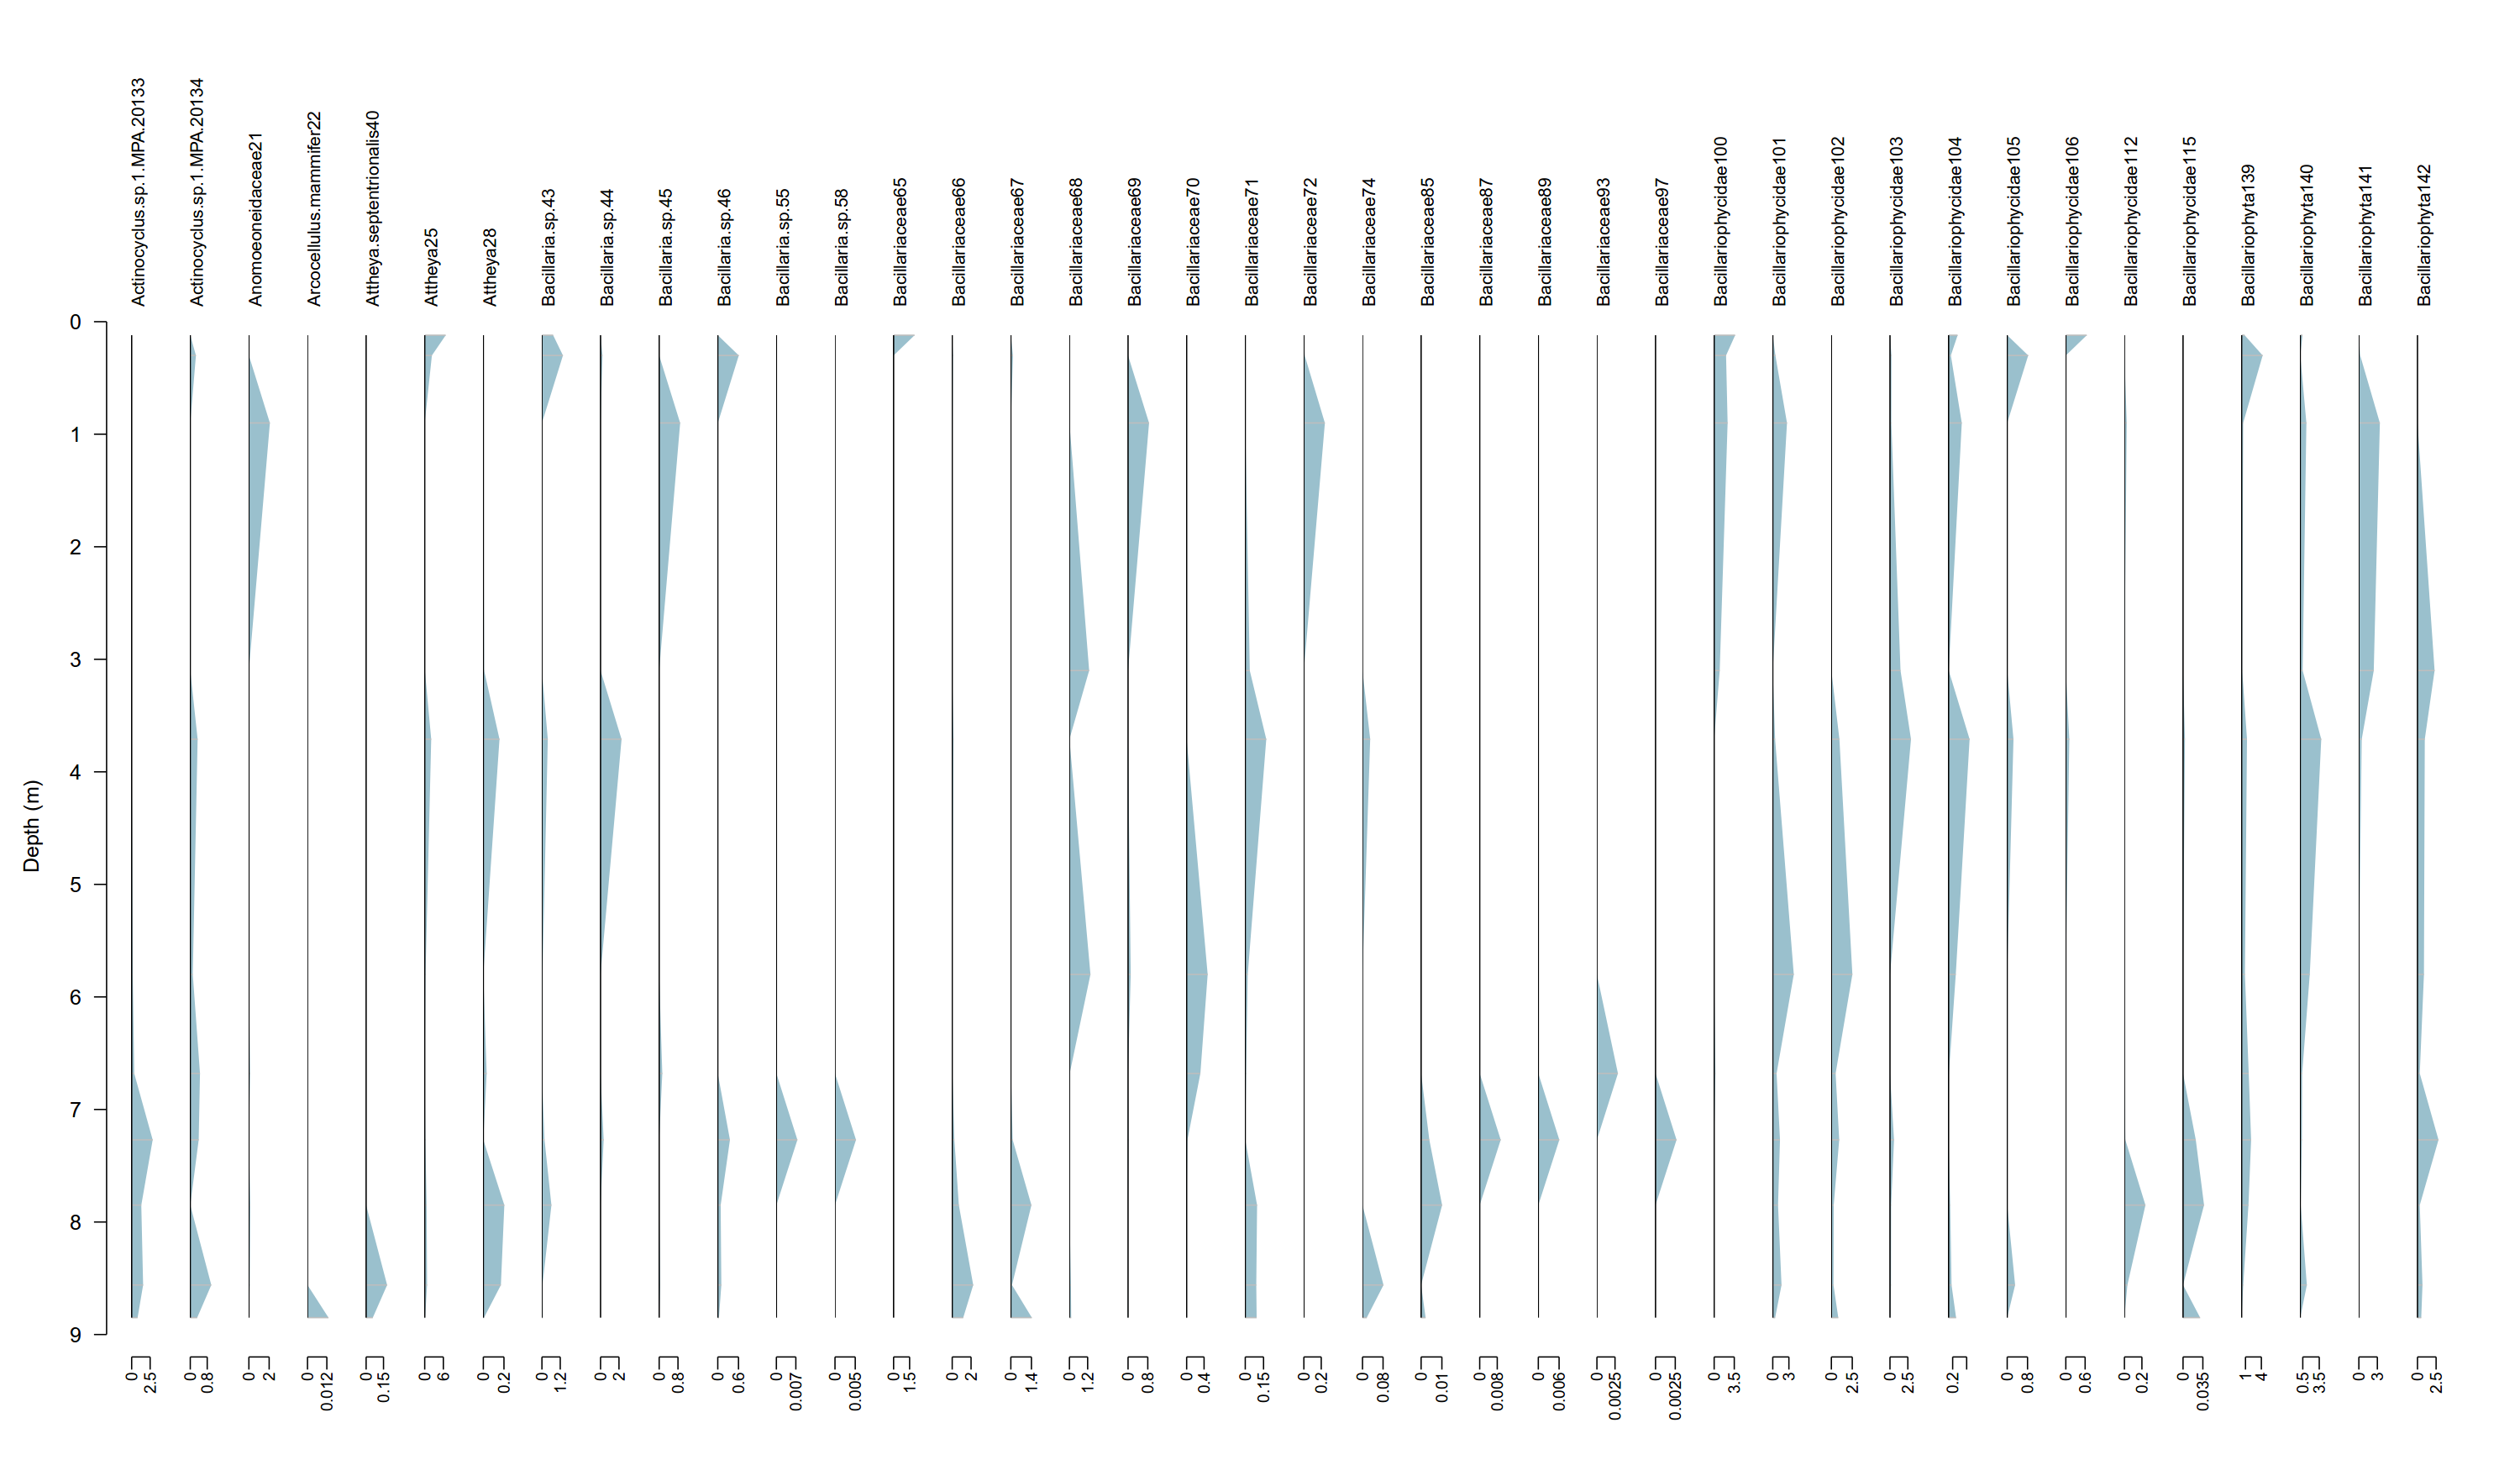
 **Figure S1: Stratigraphic diagram, showing proportions (%) for each amplicon sequence variant (ASV) per depth (m).**


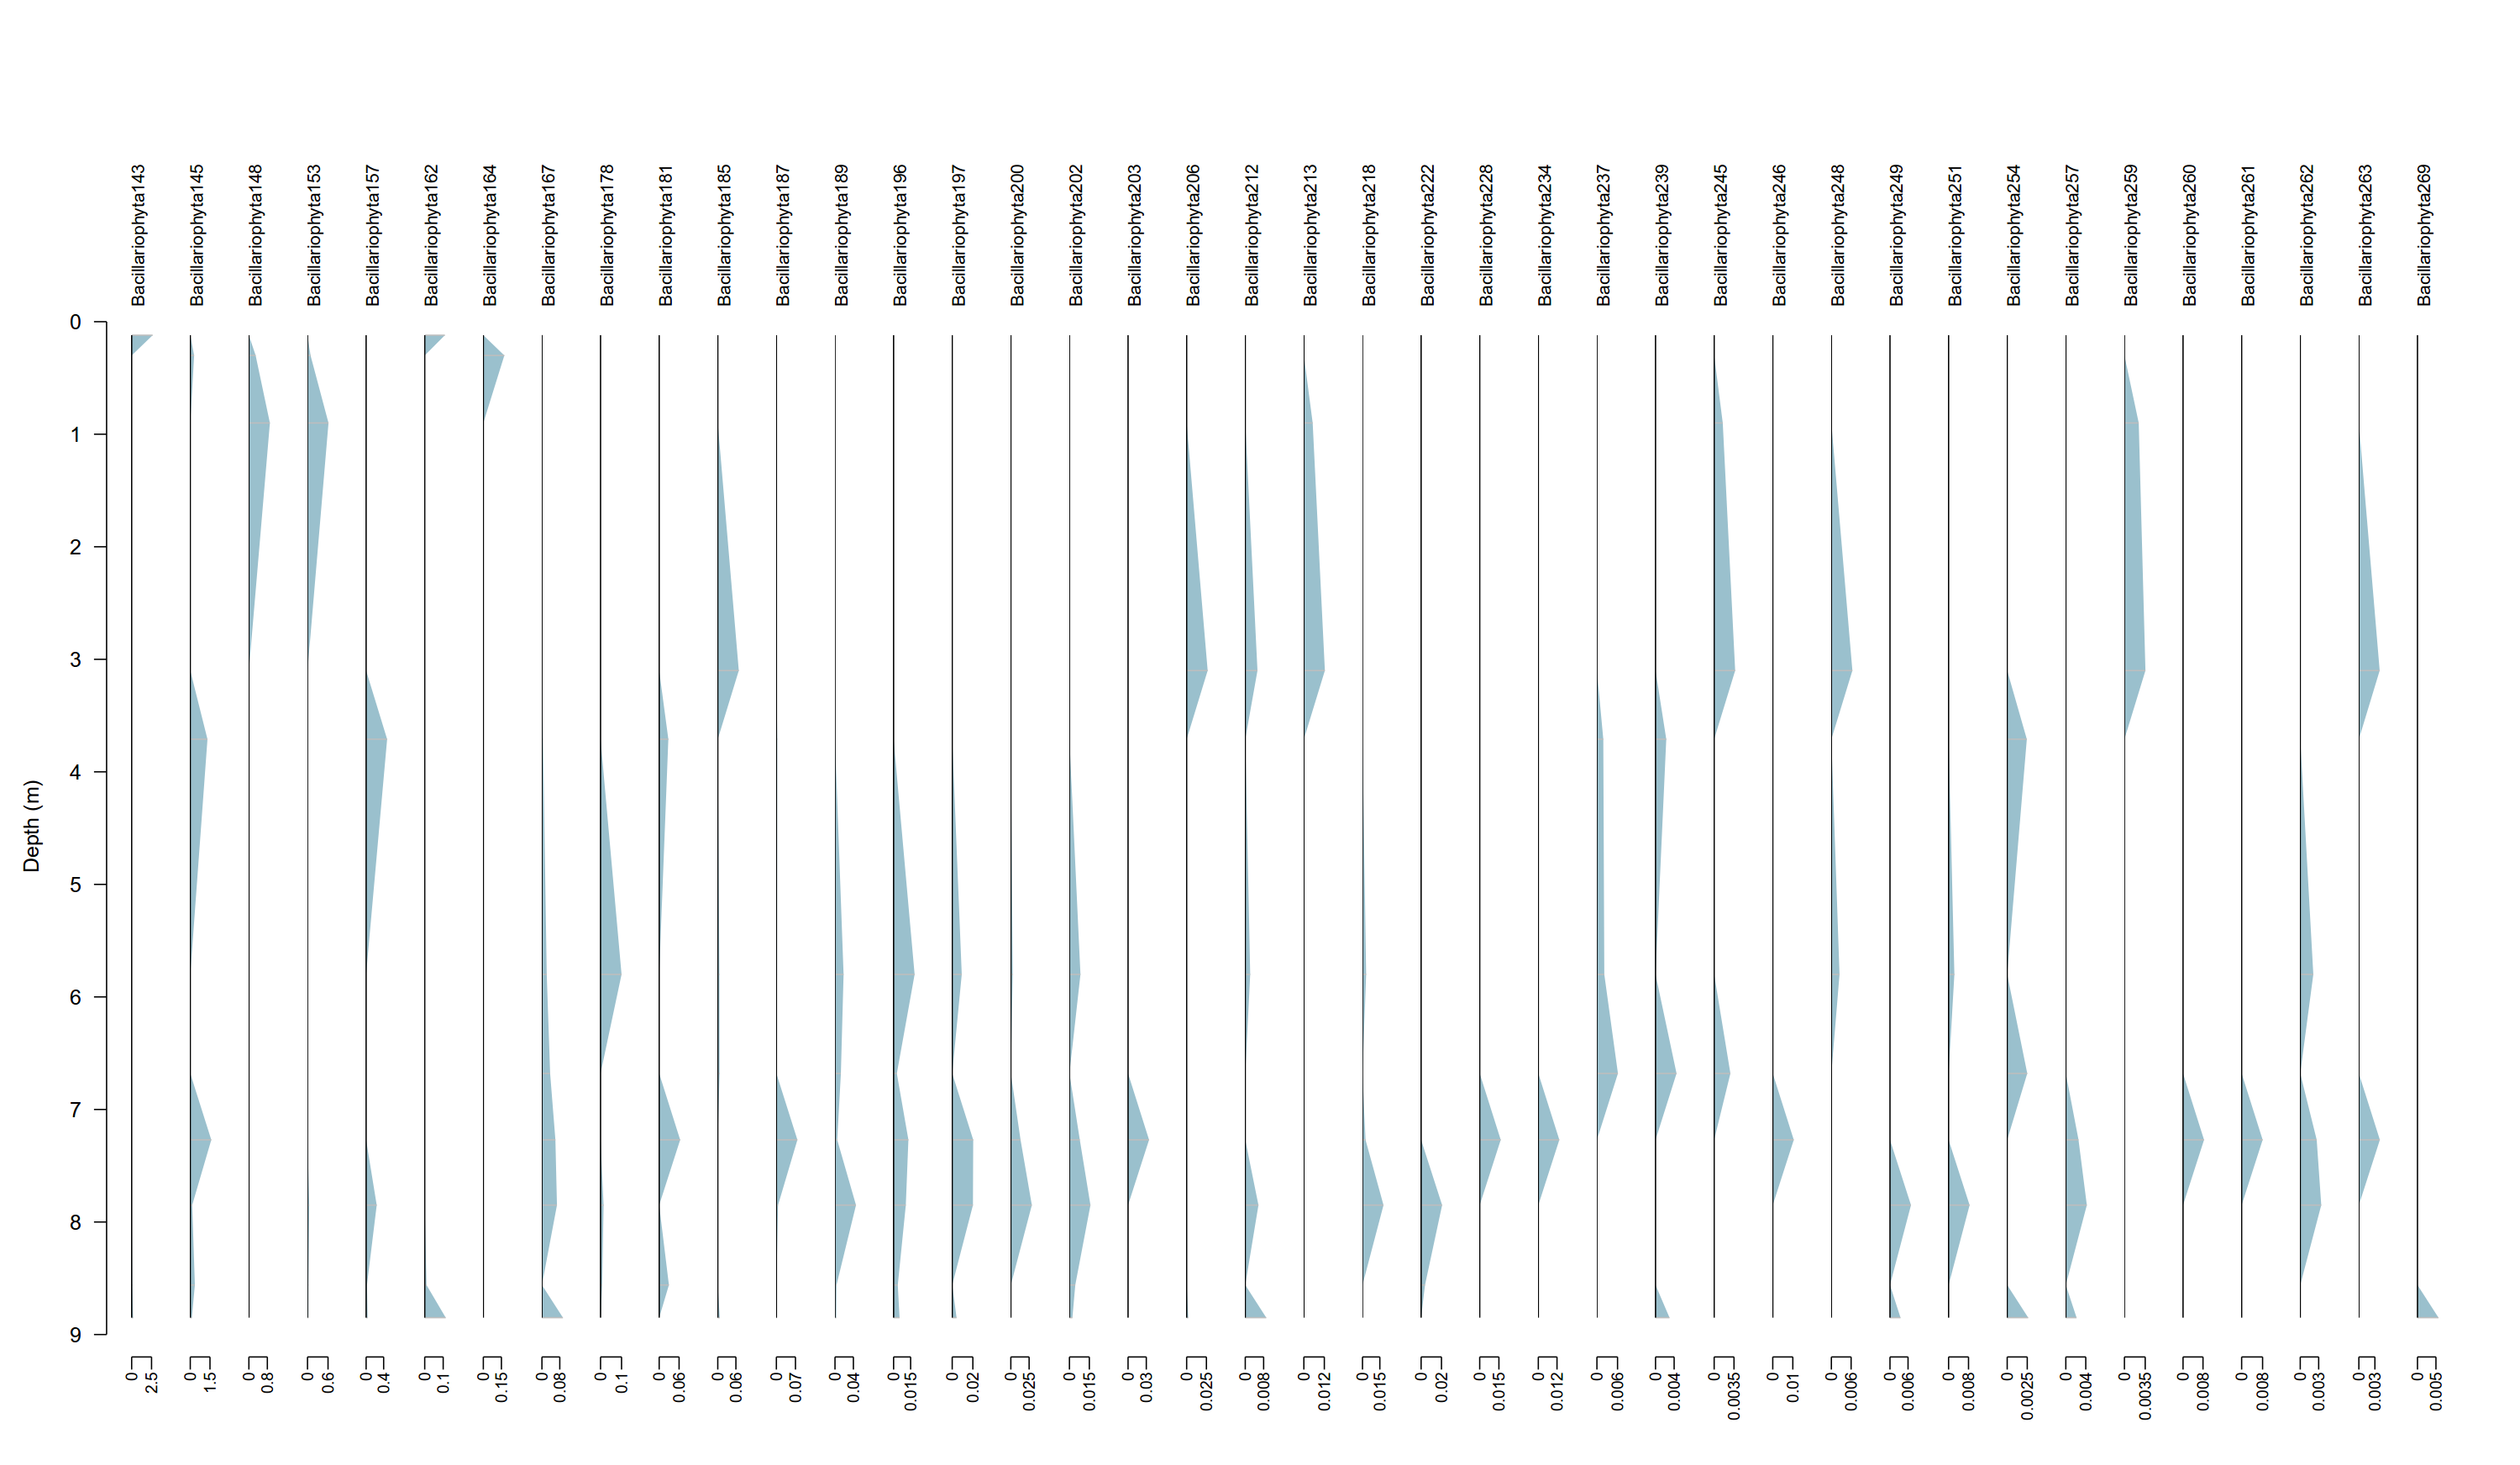
 **Figure S1: Continuation of stratigraphic diagram, showing proportions (%) for each amplicon sequence variant (ASV) per depth (m).**


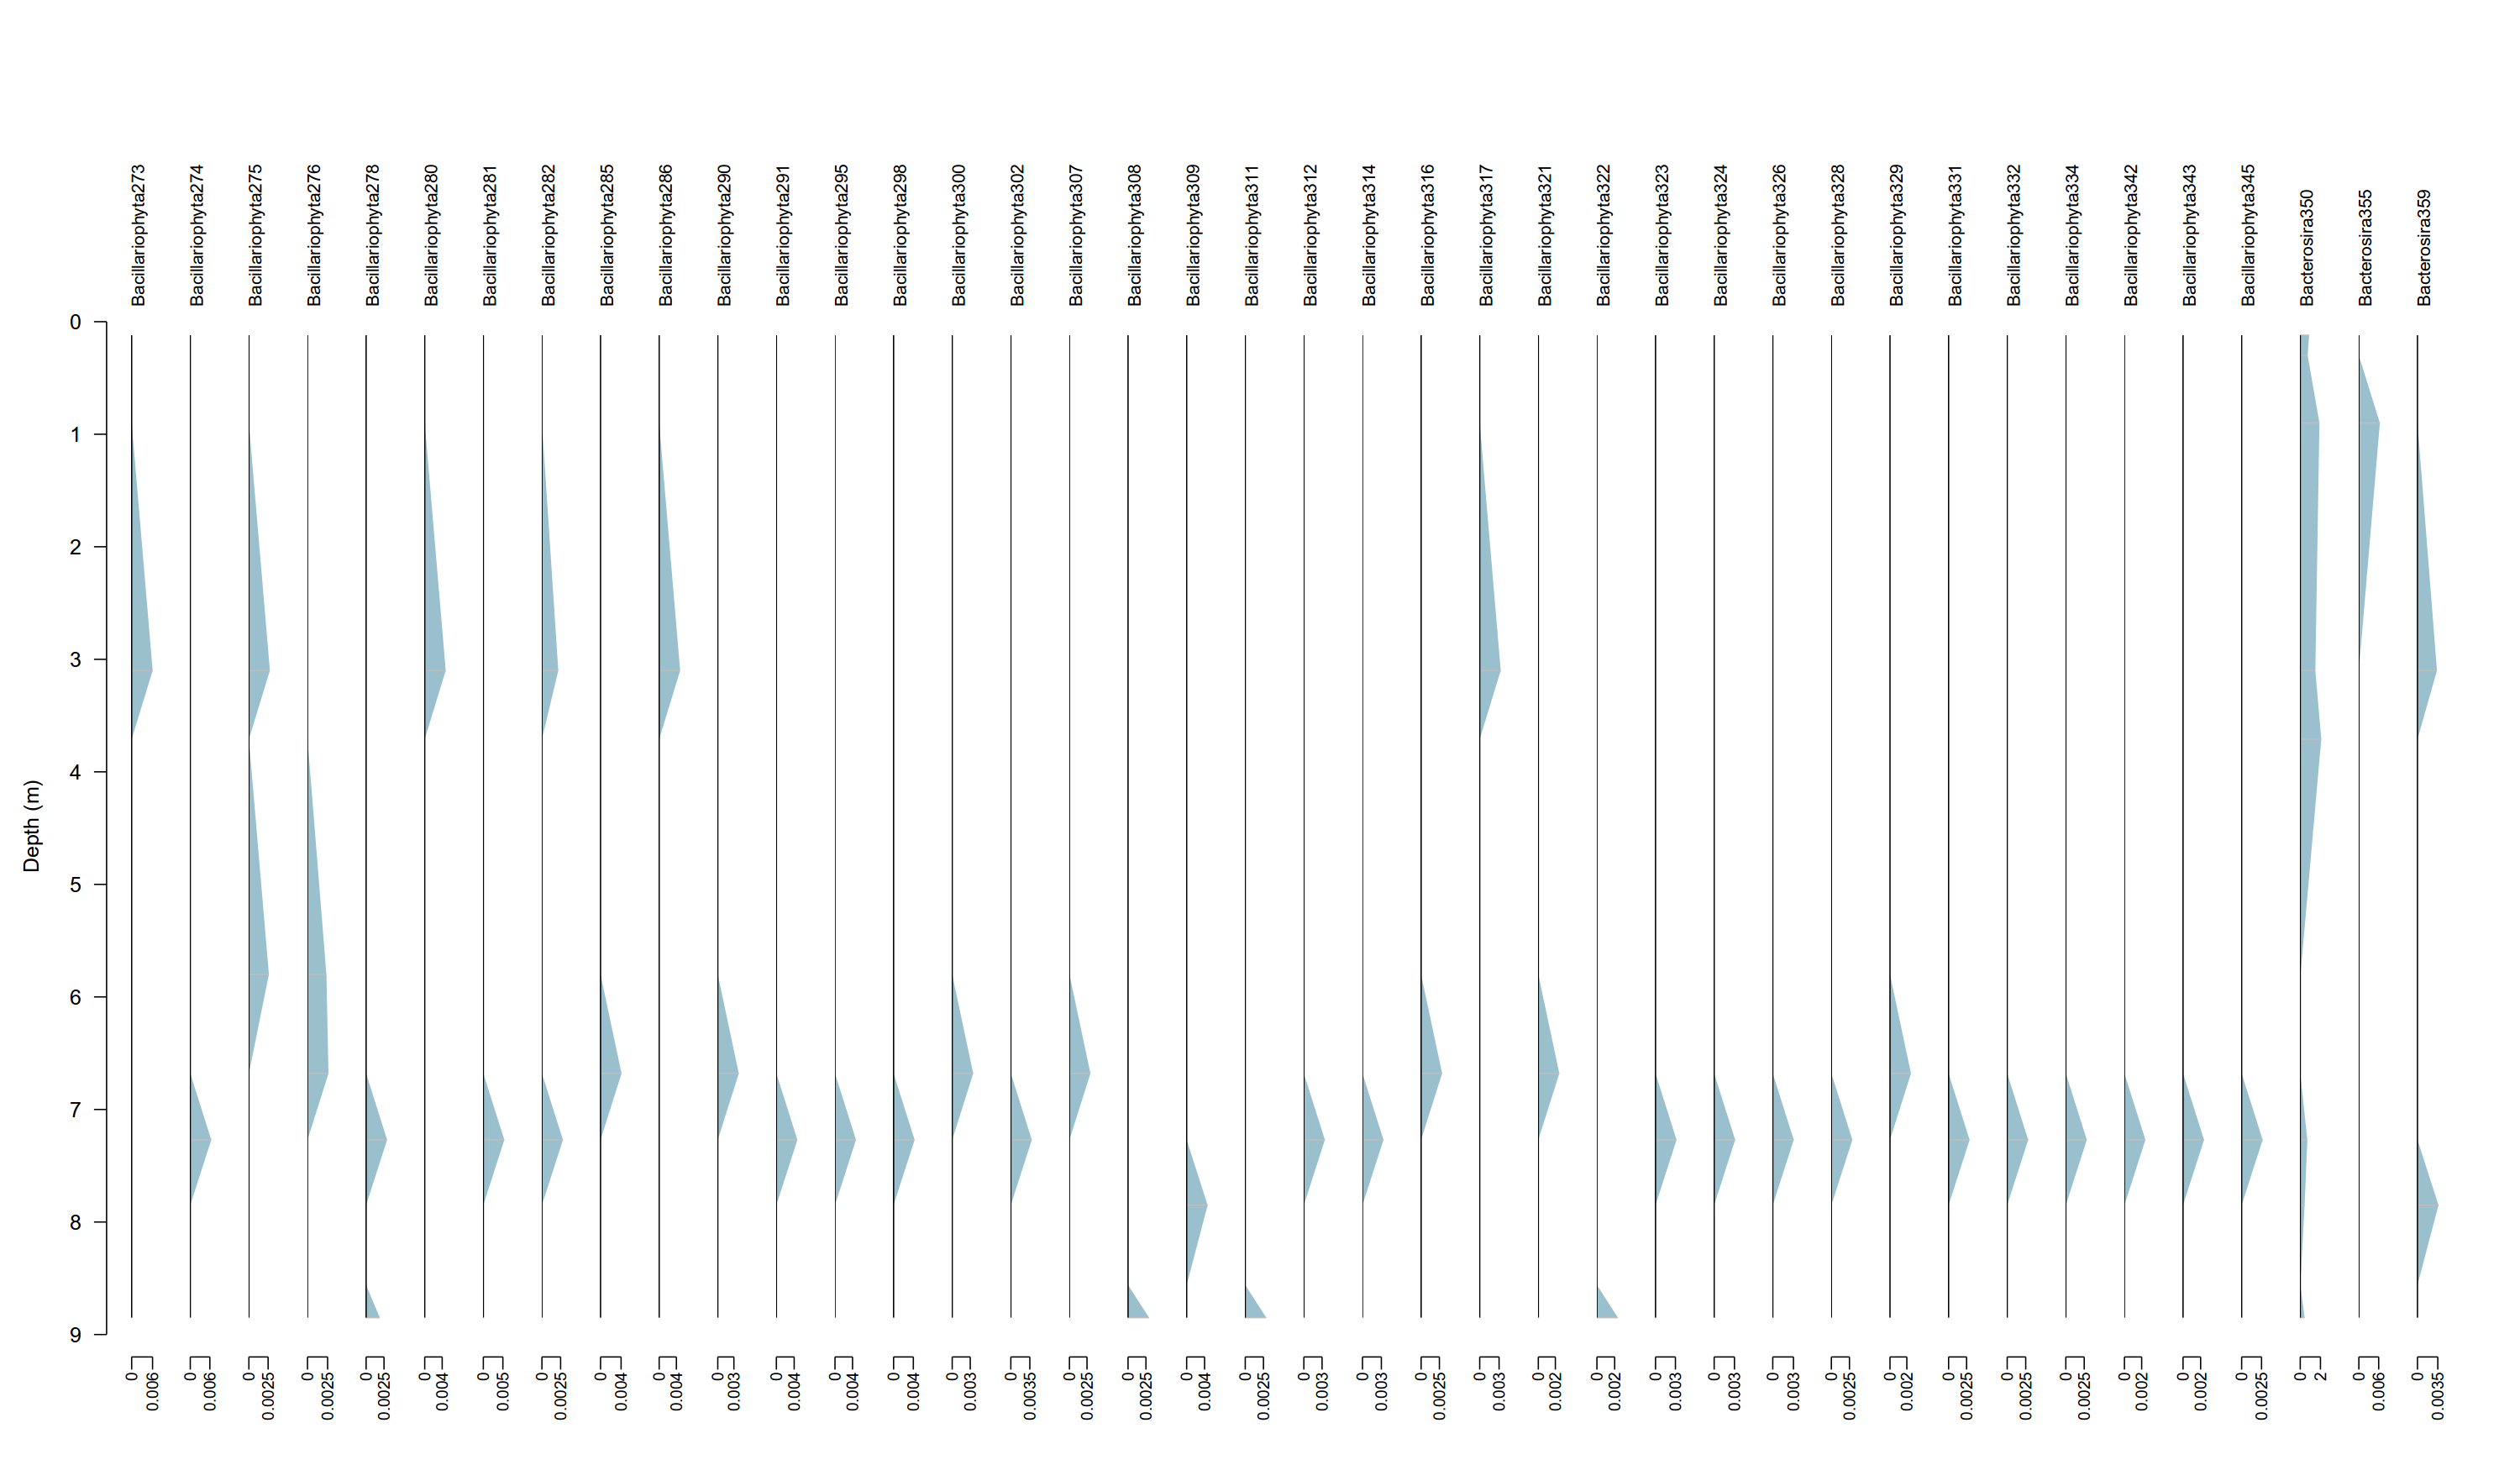
 **Figure S1: Continuation of stratigraphic diagram, showing proportions (%) for each amplicon sequence variant (ASV) per depth (m).**


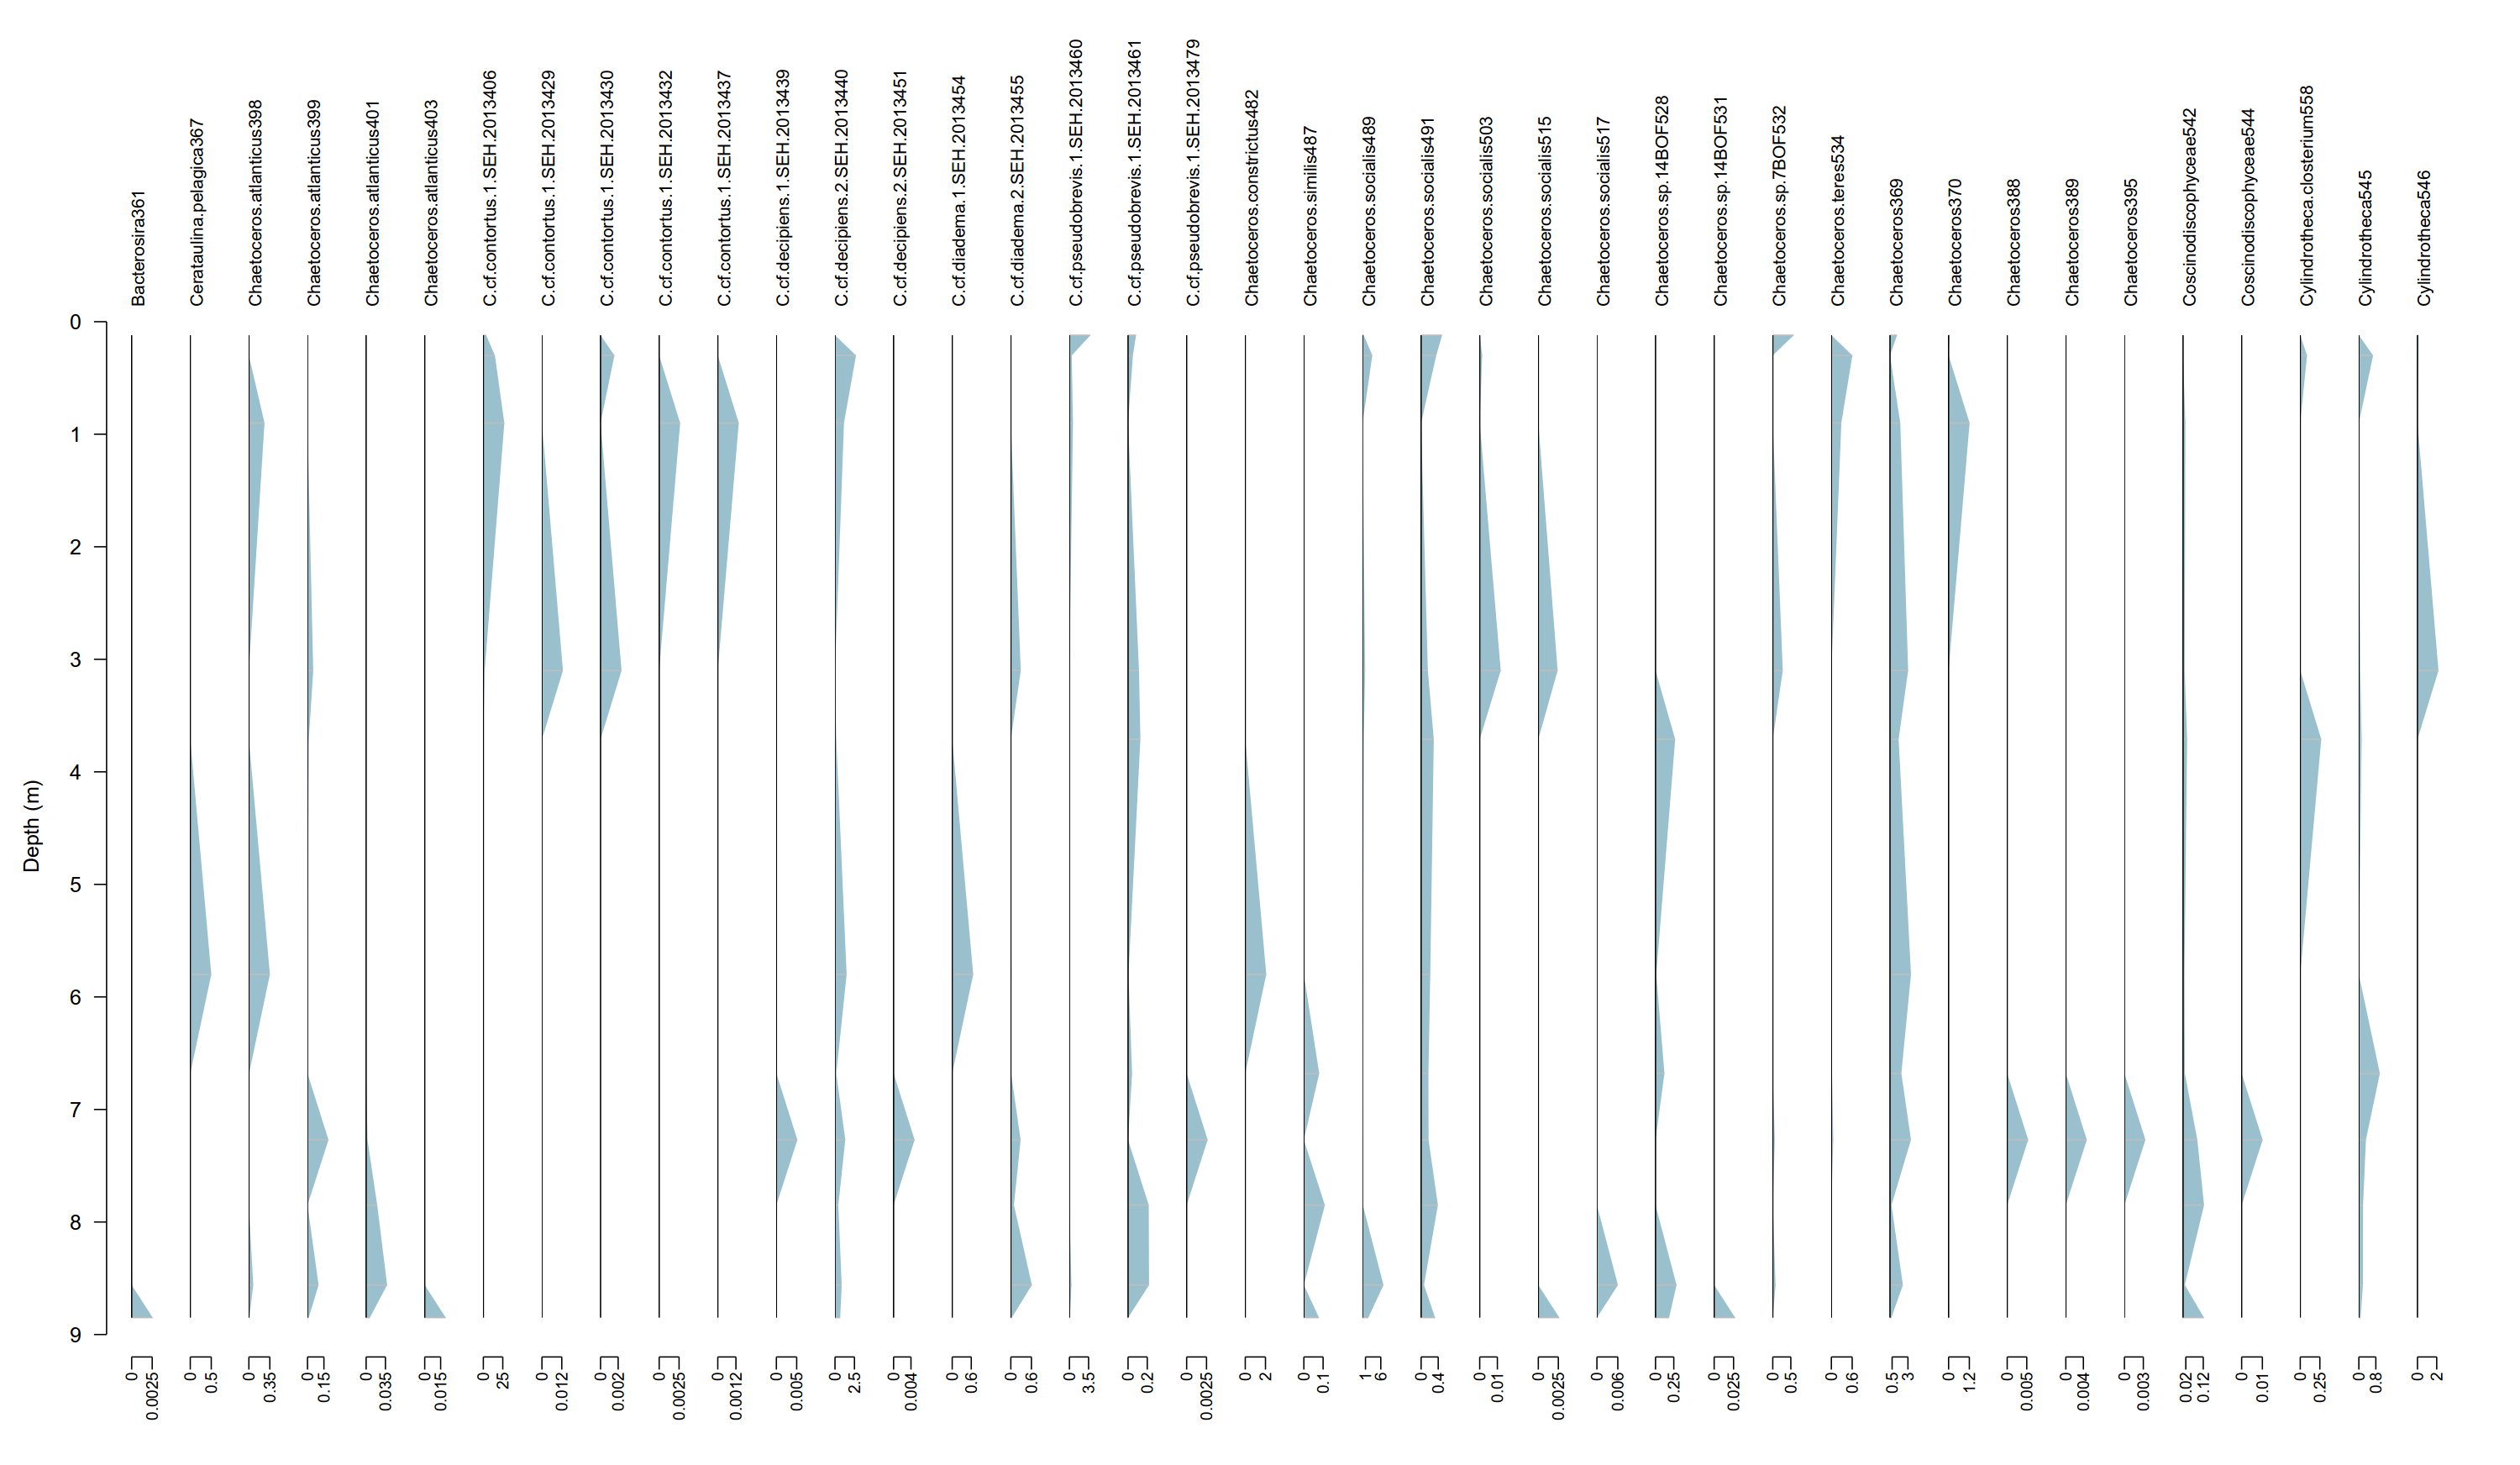
 **Figure S1: Continuation of stratigraphic diagram, showing proportions (%) for each amplicon sequence variant (ASV) per depth (m).**


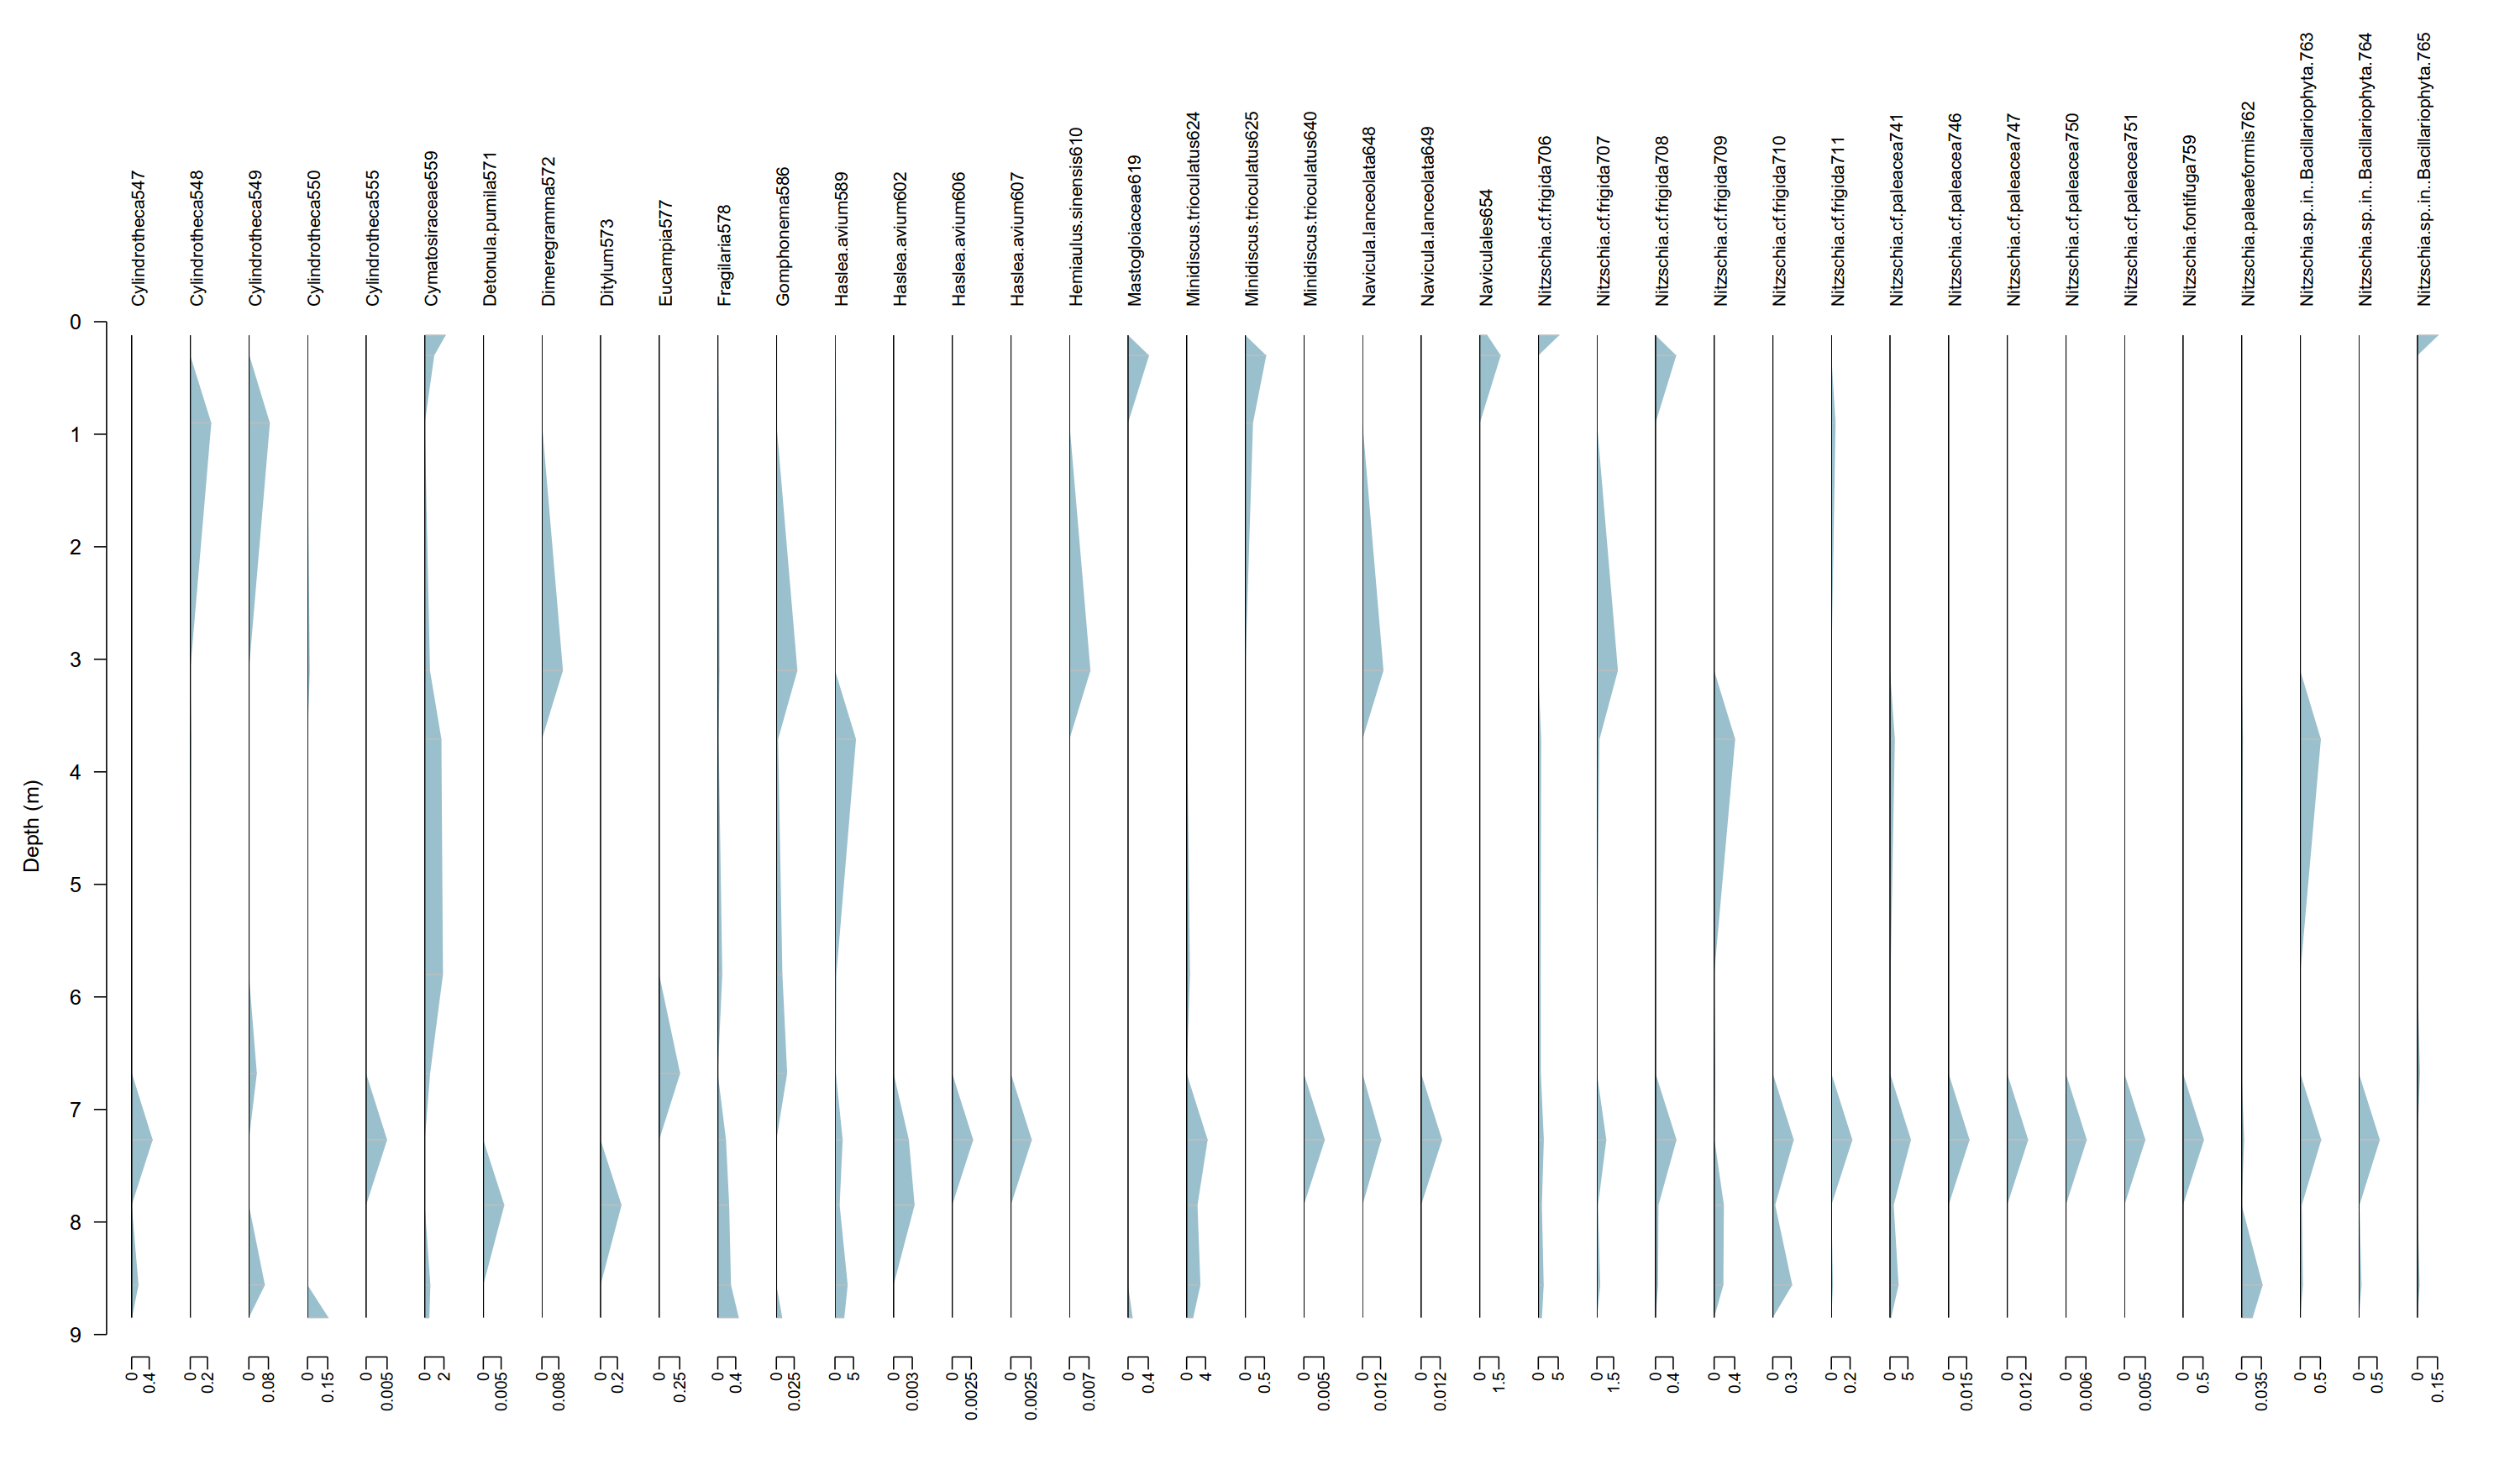
 **Figure S1: Continuation of stratigraphic diagram, showing proportions (%) for each amplicon sequence variant (ASV) per depth (m).**


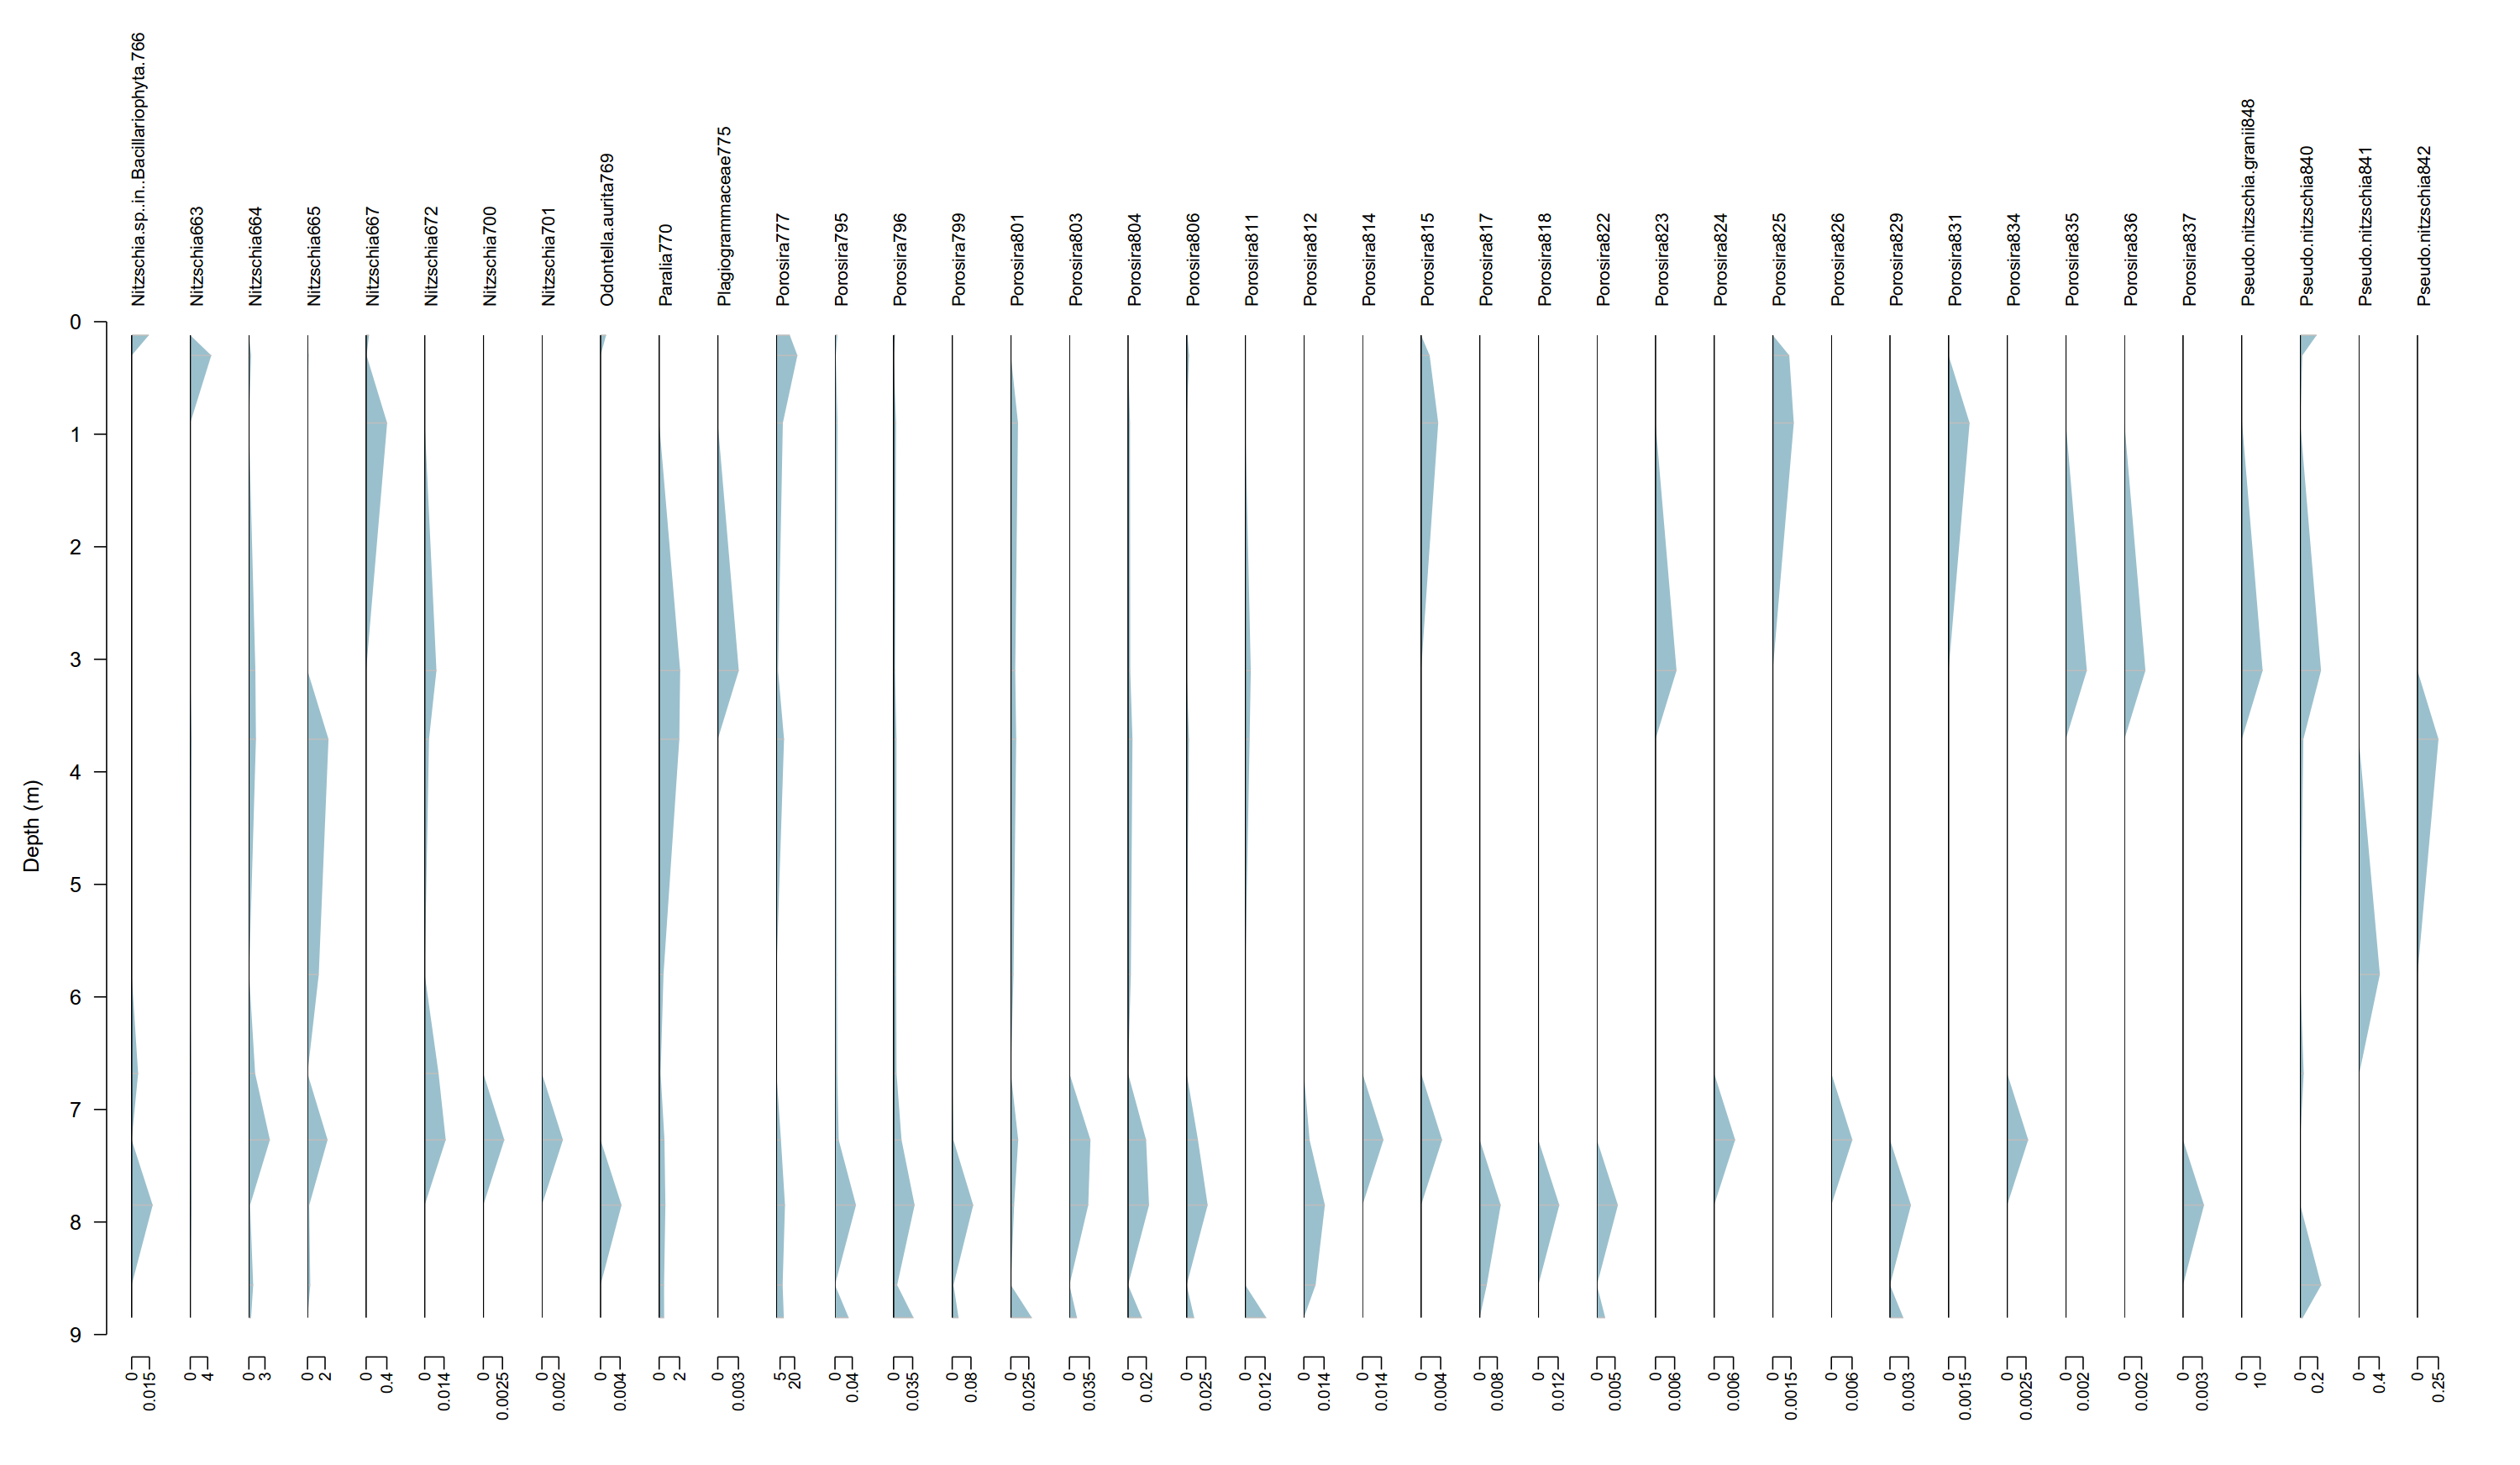
 **Figure S1: Continuation of stratigraphic diagram, showing proportions (%) for each amplicon sequence variant (ASV) per depth (m).**


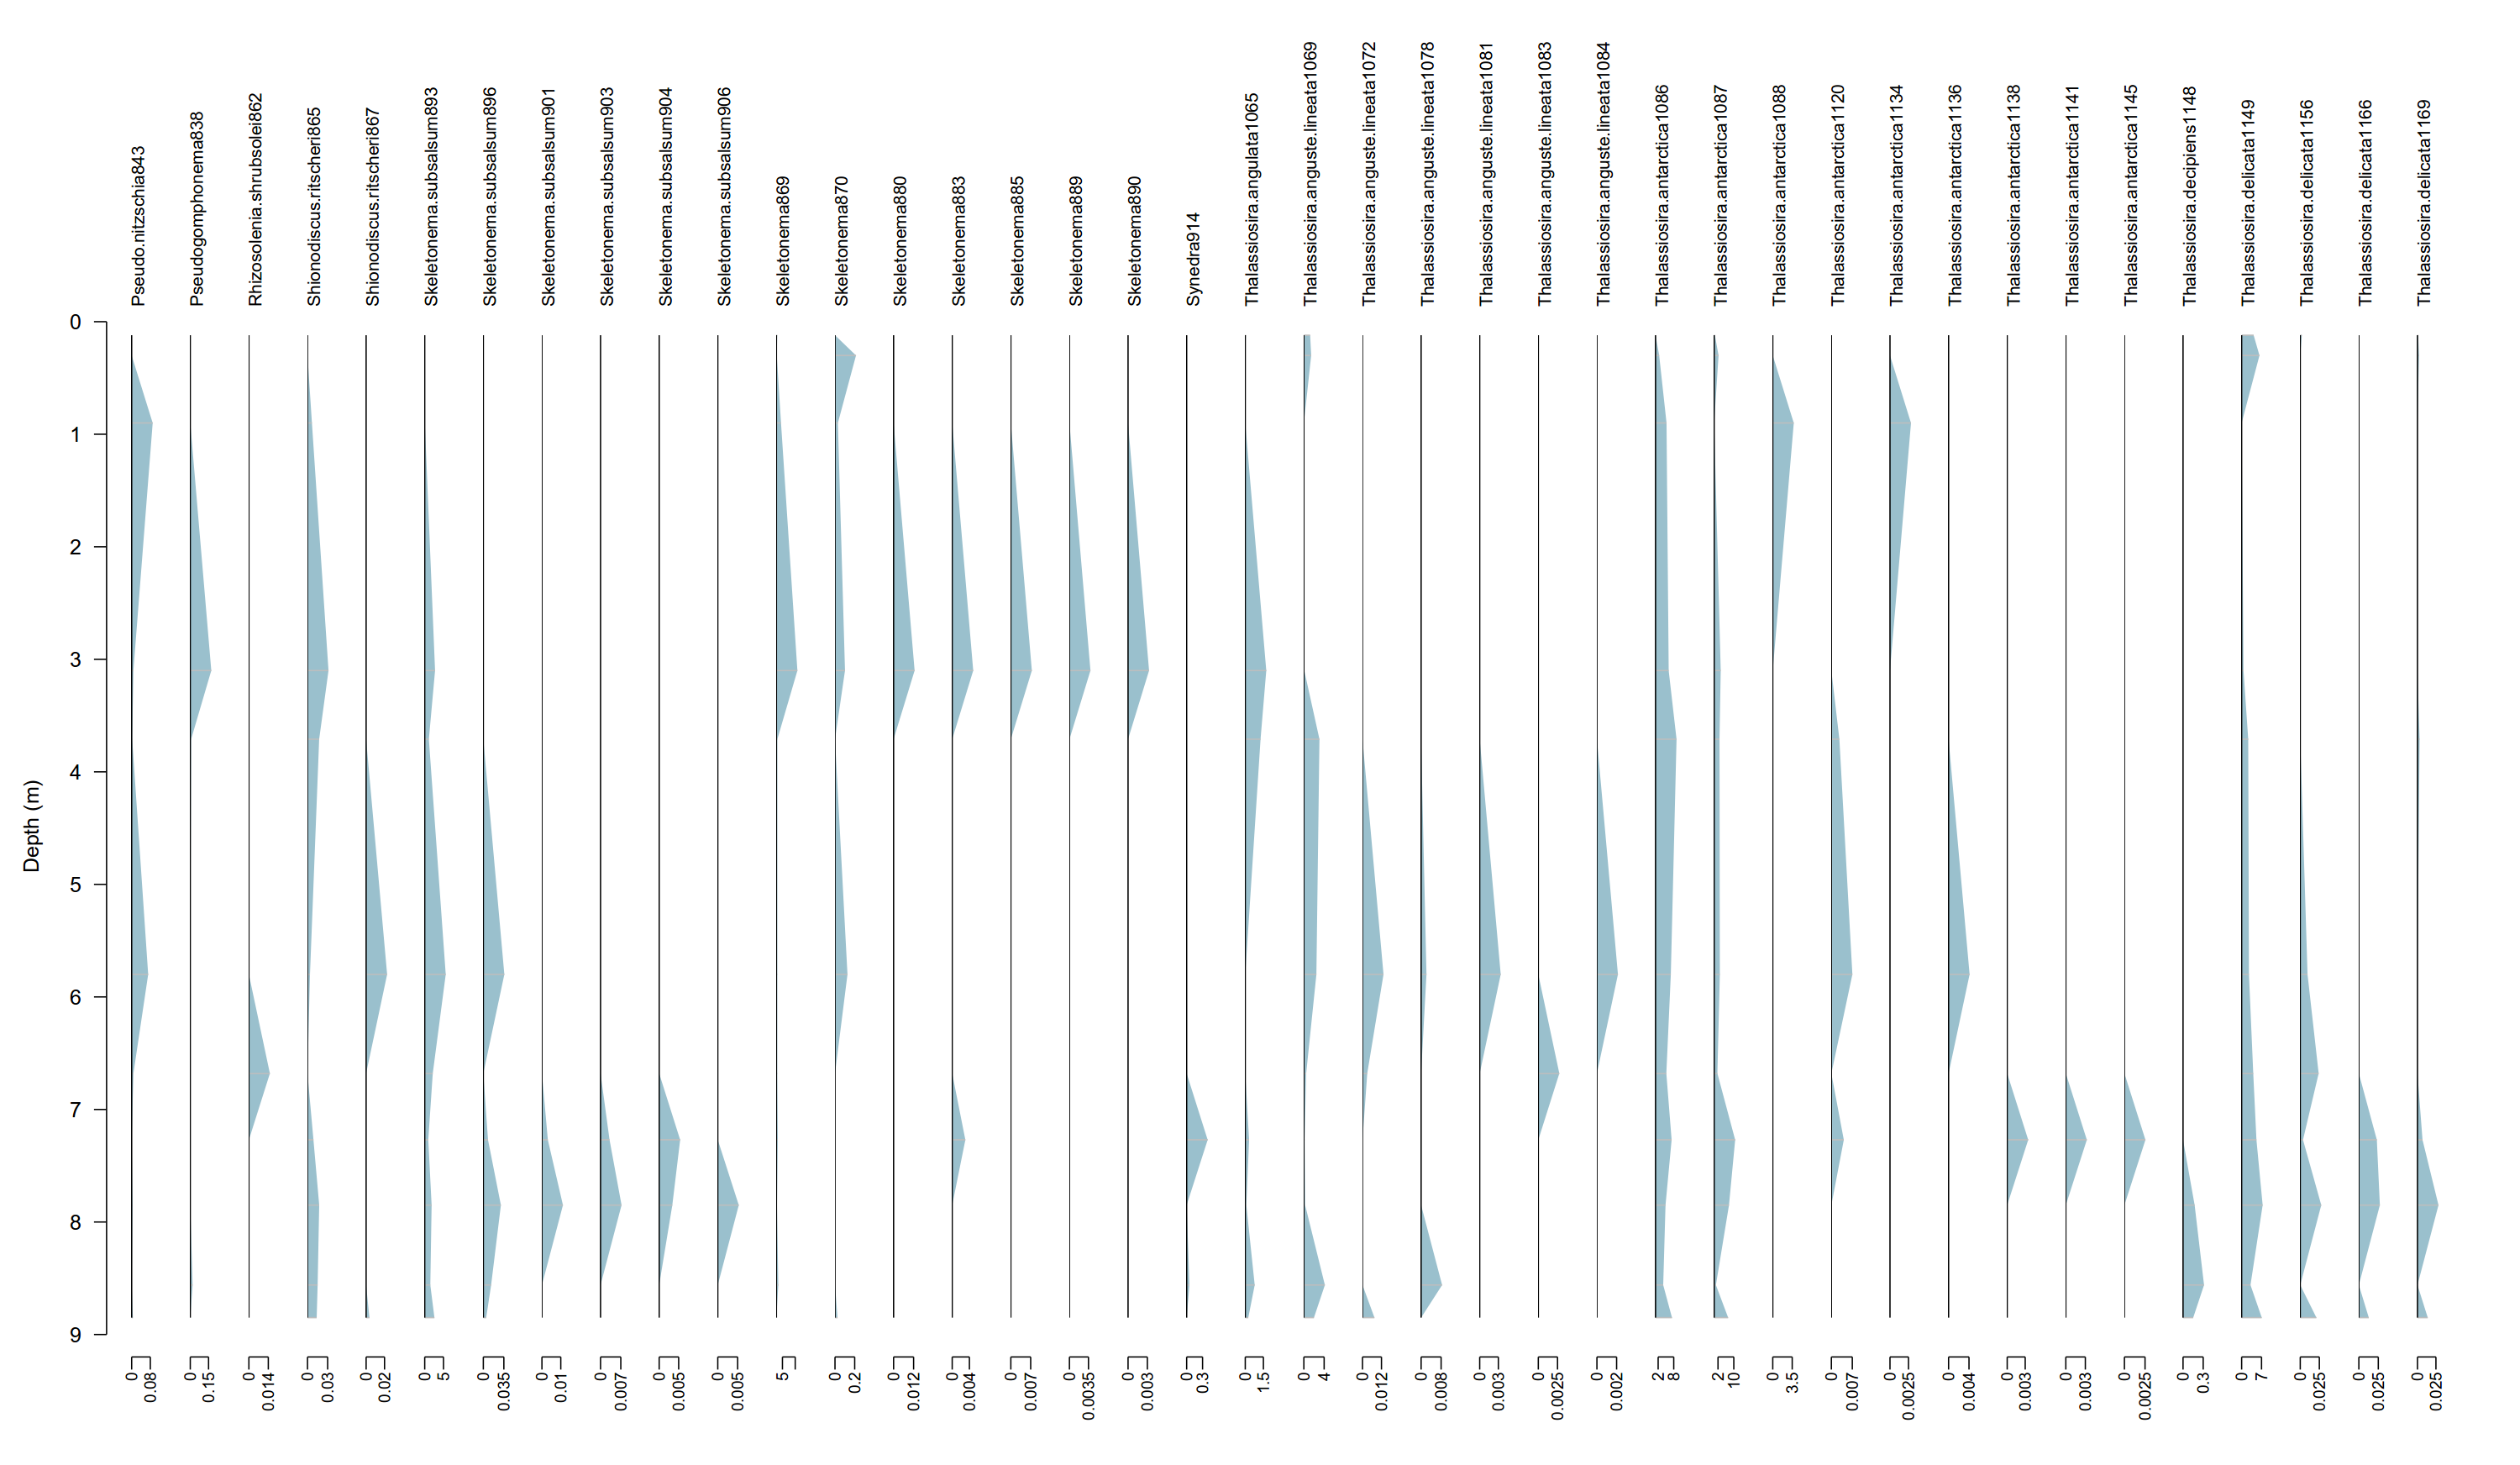


**Figure S1: Continuation of stratigraphic diagram, showing proportions (%) for each amplicon sequence variant (ASV) per depth (m).**


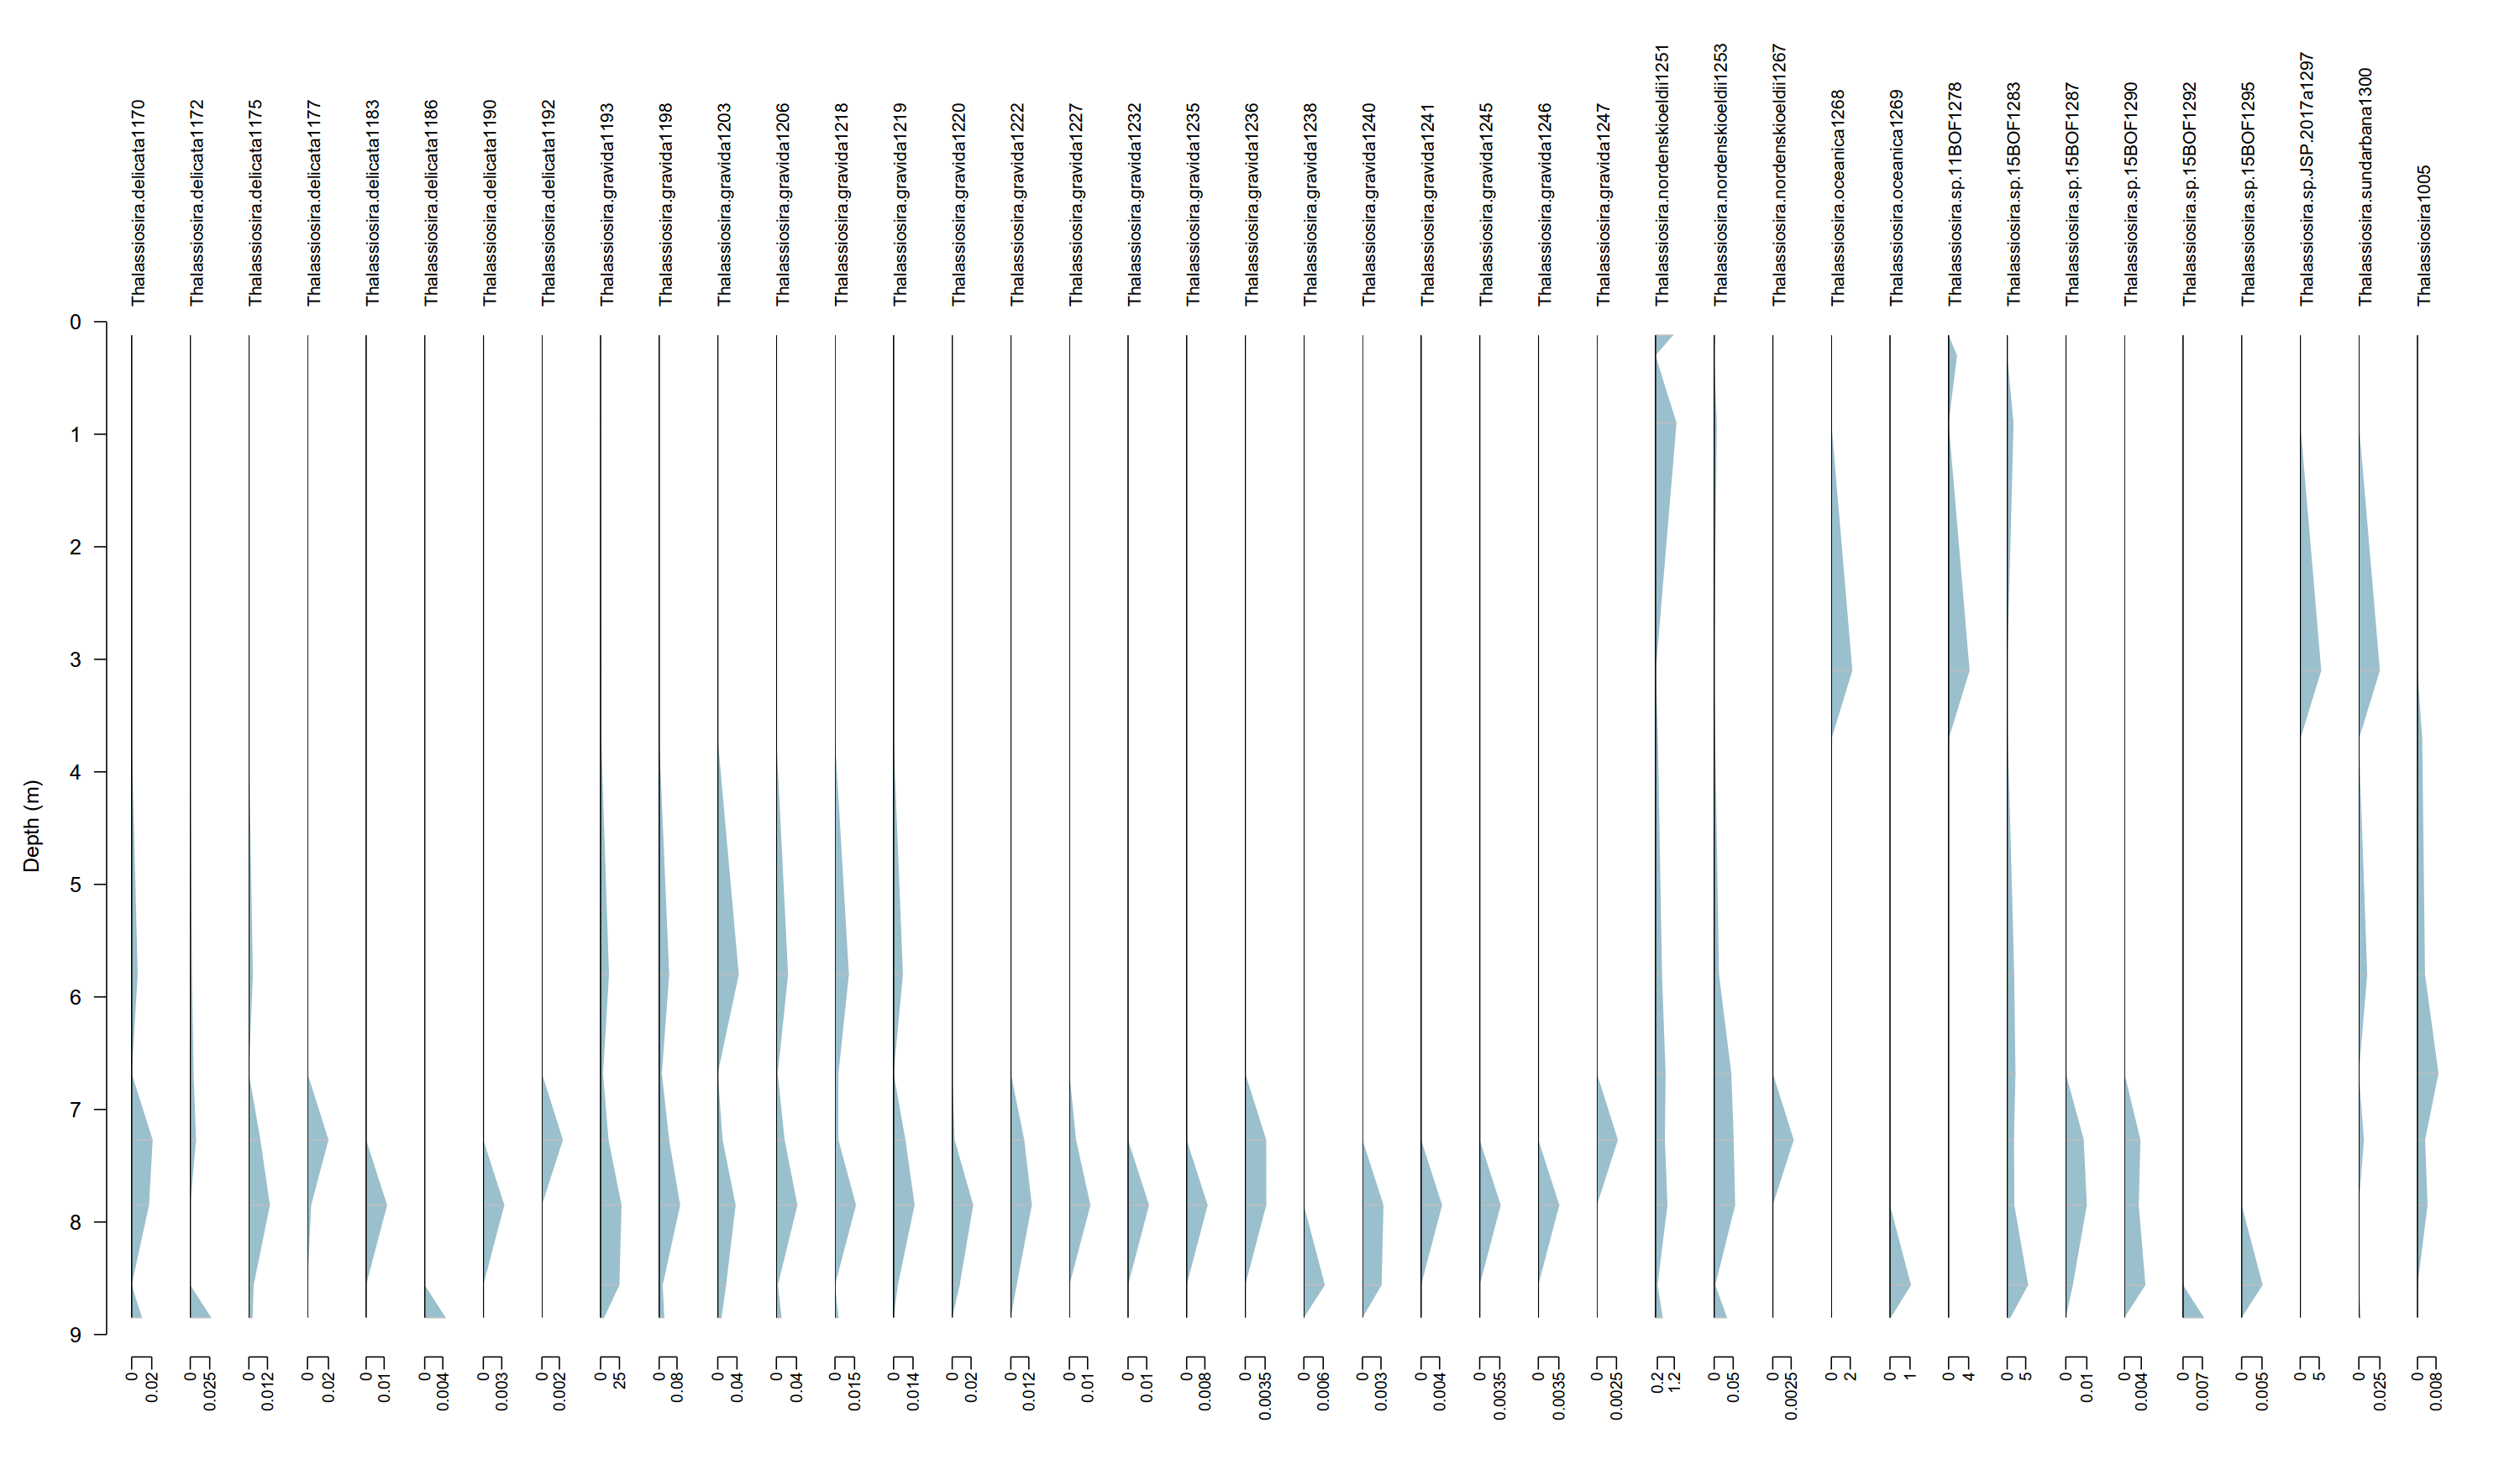


**Figure S1: Continuation of stratigraphic diagram, showing proportions (%) for each amplicon sequence variant (ASV) per depth (m).**


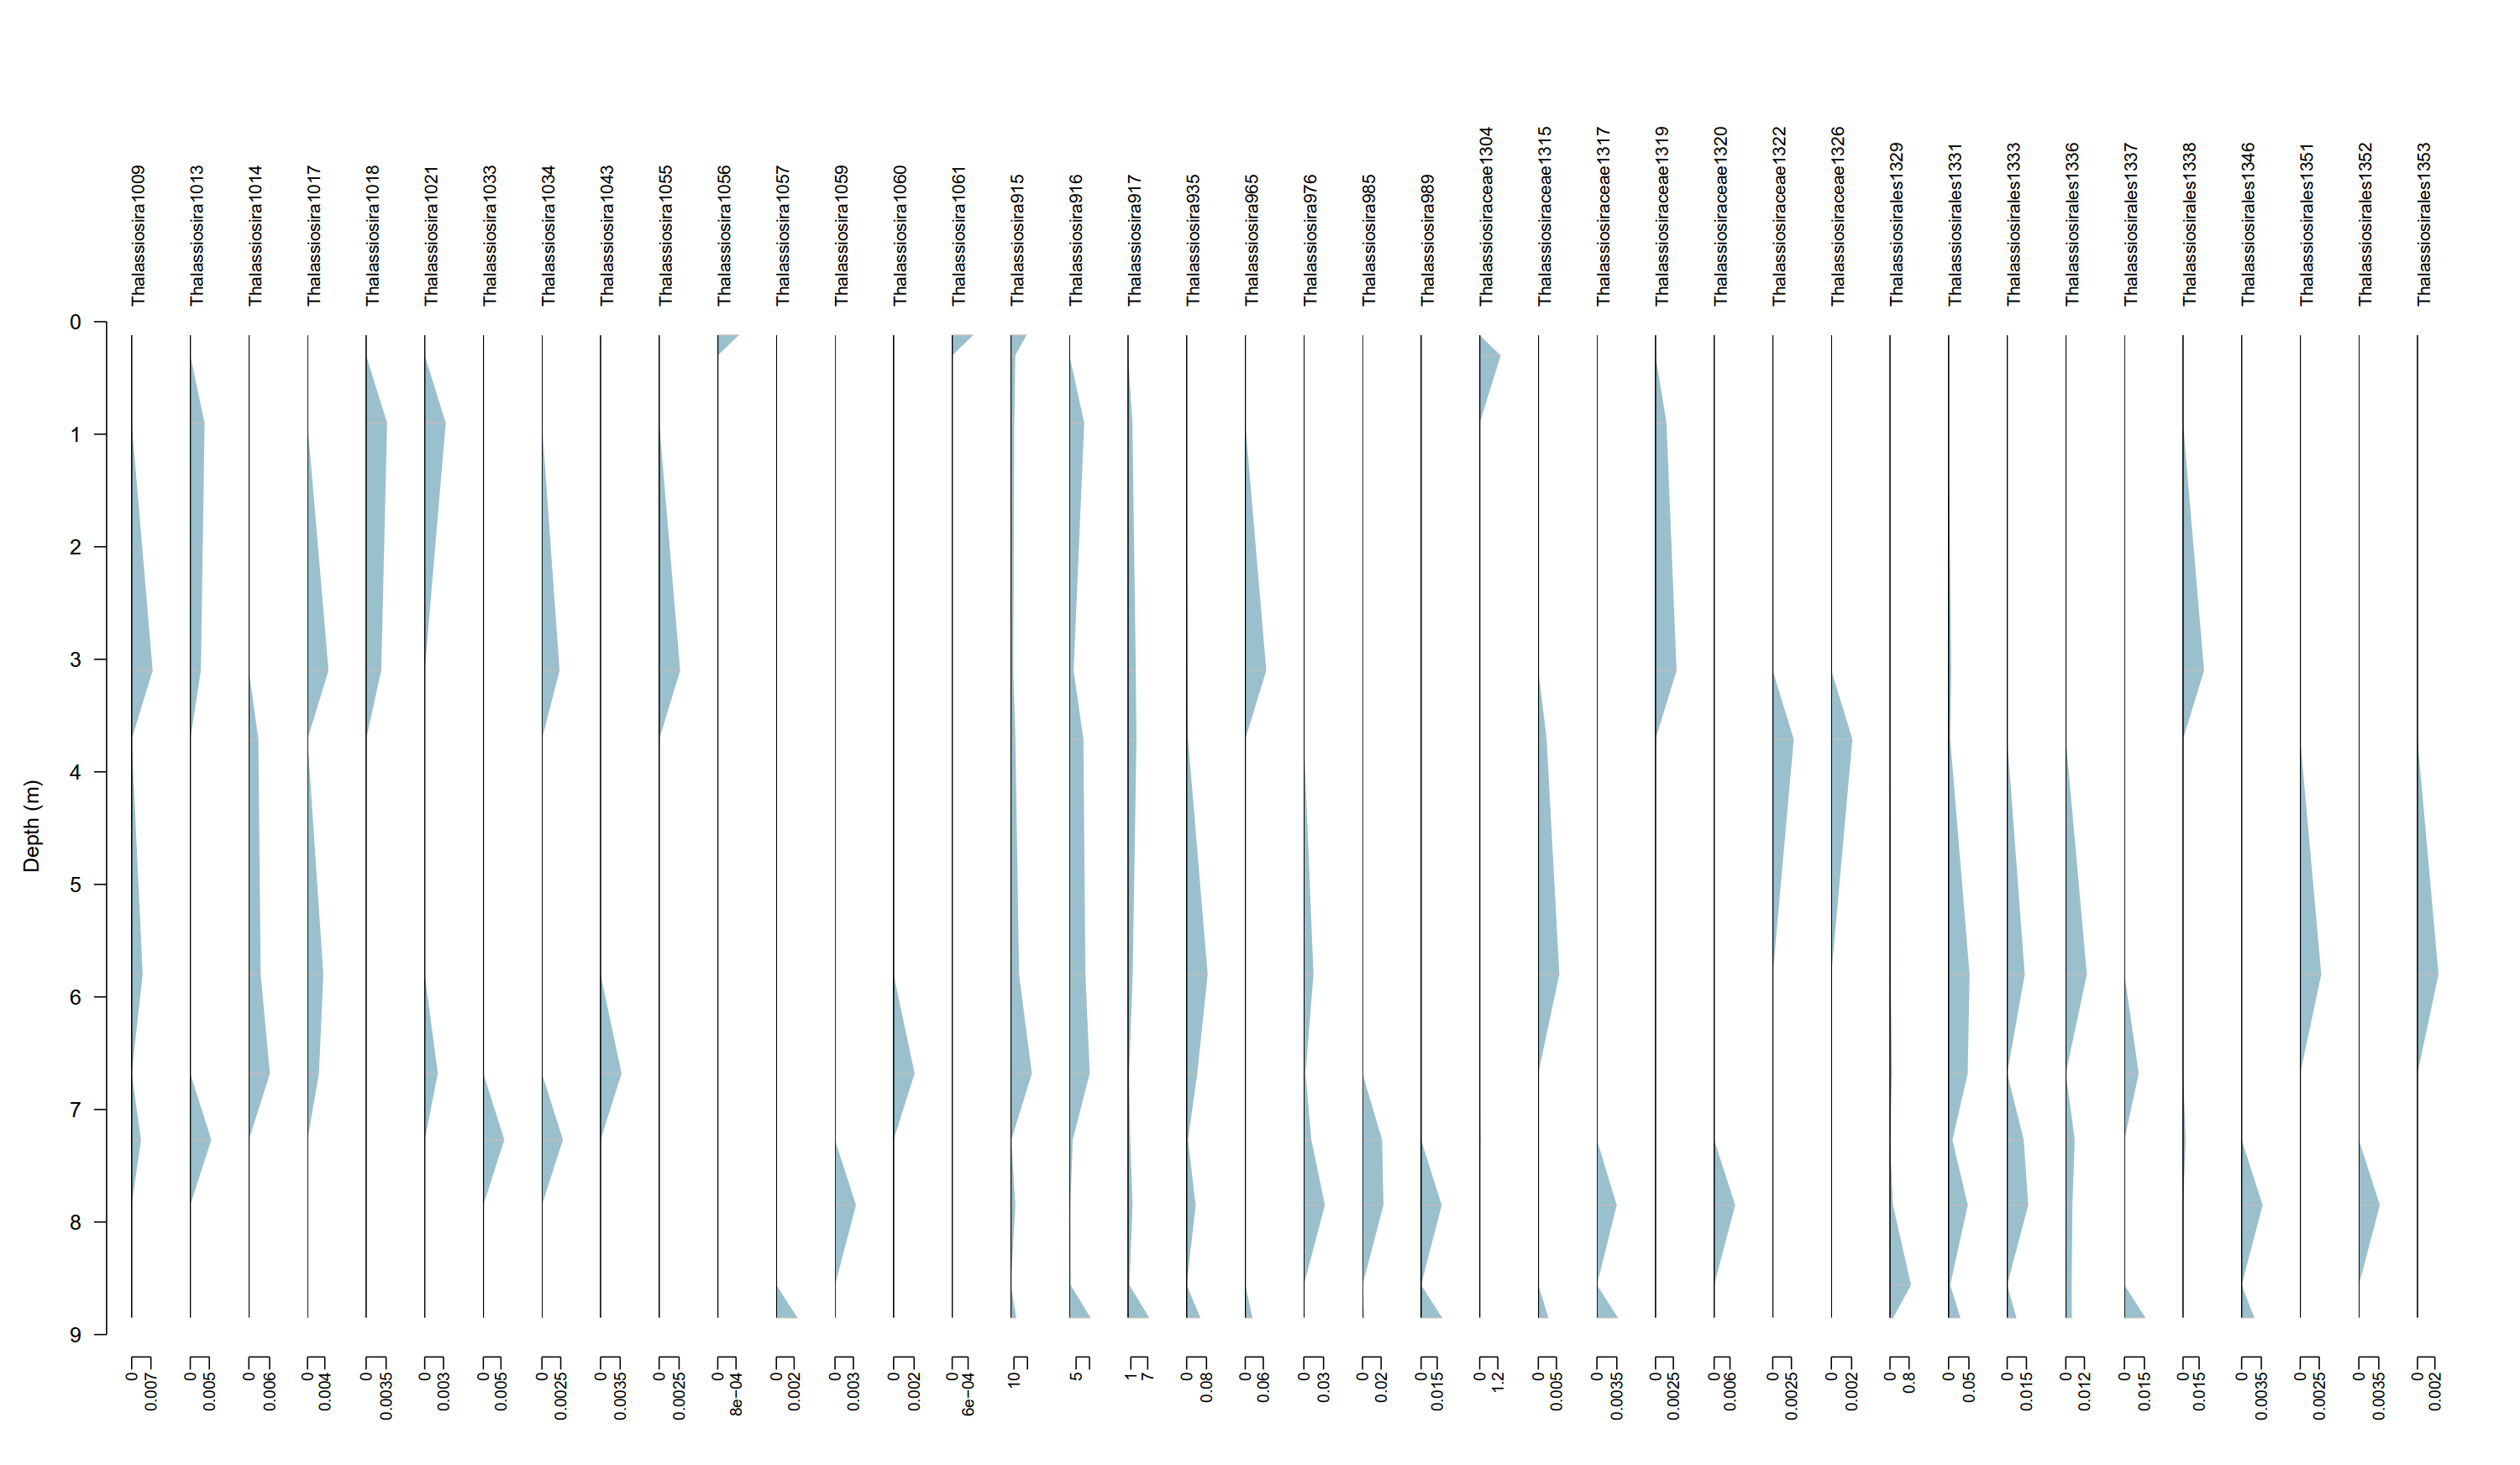


**Figure S1: Continuation of stratigraphic diagram, showing proportions (%) for each amplicon sequence variant (ASV) per depth (m).**


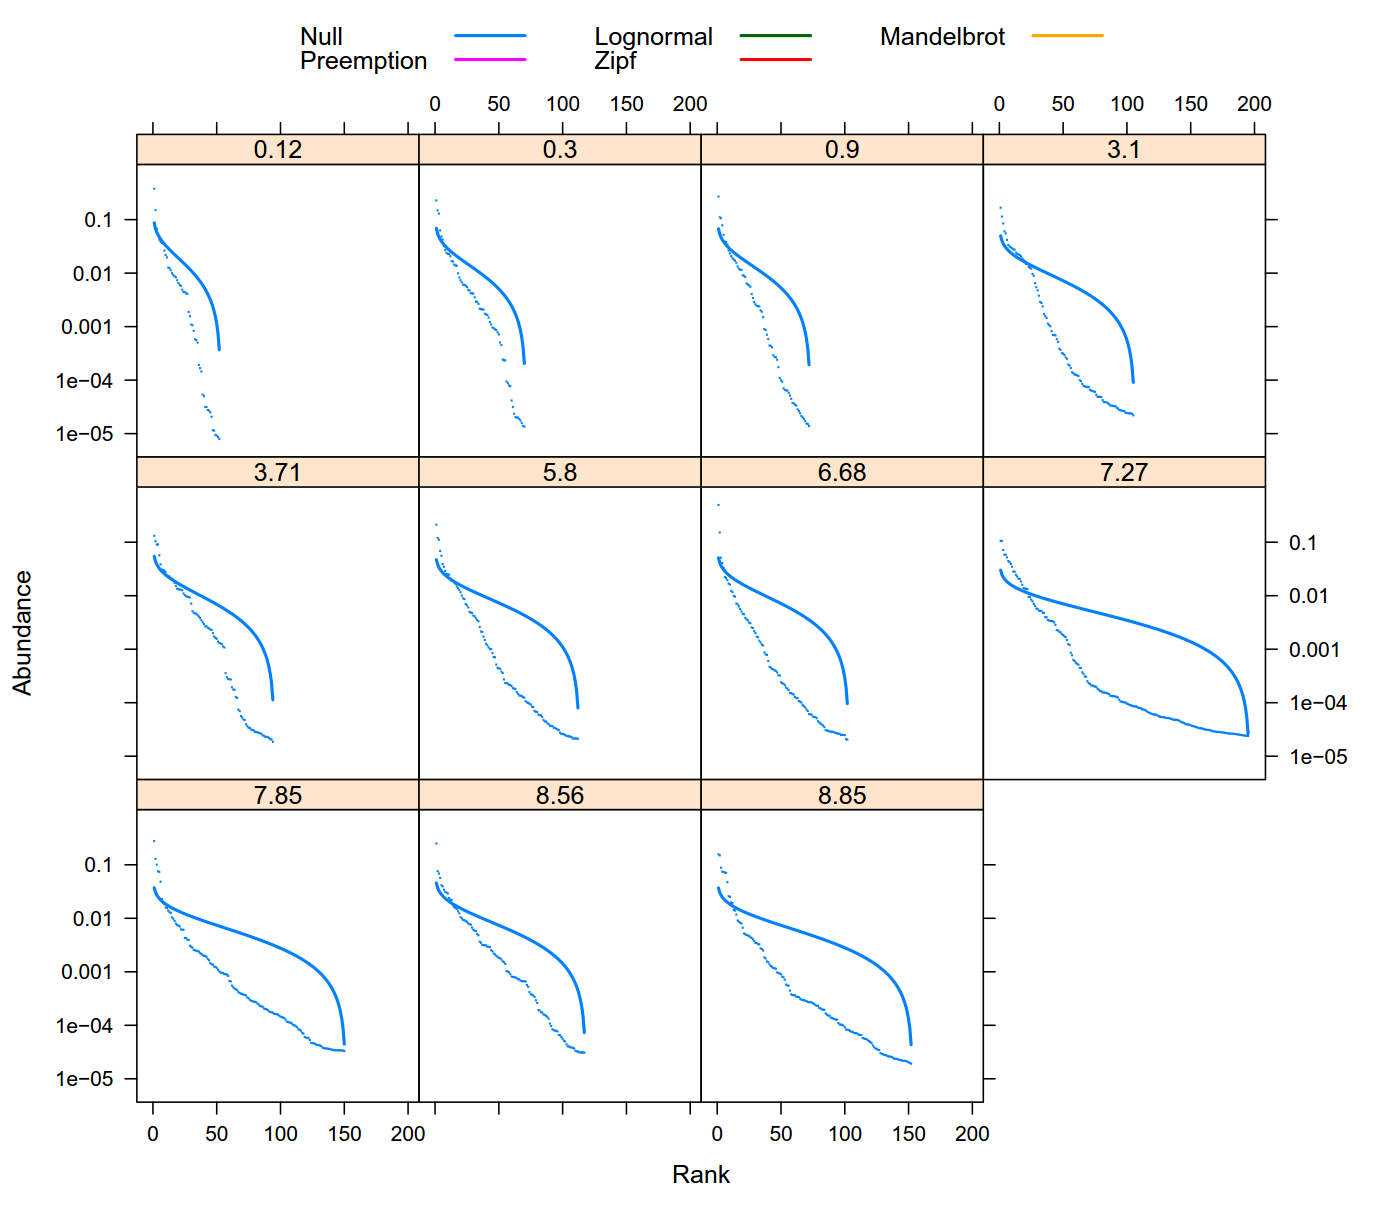


**Figure S2: Rank-abundance plot for each sample (depth in m) based on amplicon sequence variants (blue dots). The R-function radfit was applied on proportion data and the Null model (blue line) is based on randomly distributed counts among taxa, without fitted parameters.**


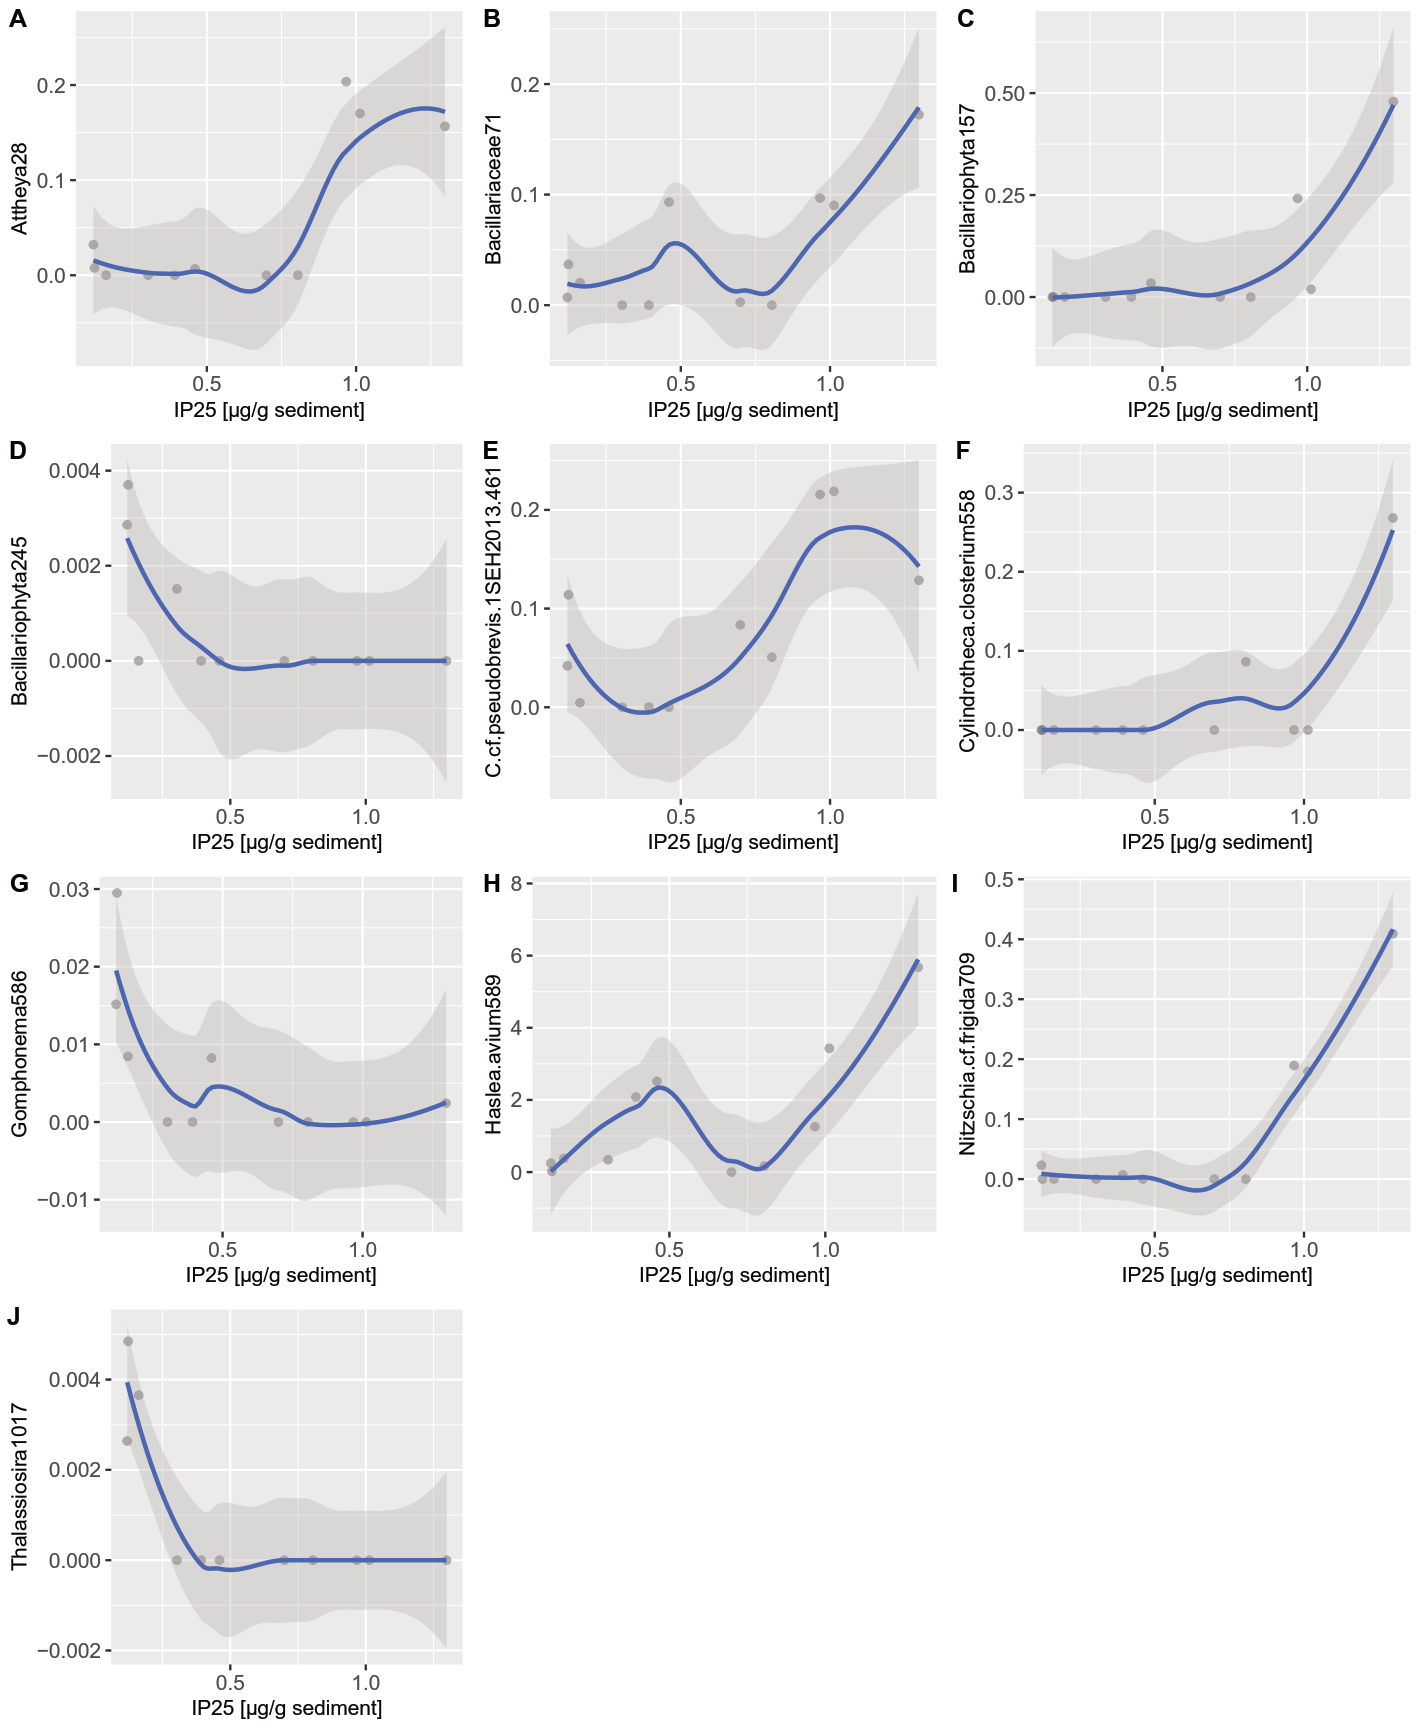


**Figure S3: Amplicon sequence variants with significant correlation to interpolated values of the sea ice biomarker IP25 with loess smoothing (blue line) and standard error (dark grey area).**
