# Supplementary material for: Changes in the composition of marine and sea-ice diatoms derived from sedimentary ancient DNA of the eastern Fram Strait over the past 30 000 years
Source: Copernicus journal article supplement (doi:10.5194/os-16-1017-2020), 2020-09-07
Supplement: Supplementary file [file os-16-1017-2020-supplement-title-page.pdf › os-16-1017-2020-supplement-title-page.pdf]

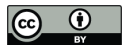

## *Supplement of*

# **Changes in the composition of marine and sea-ice diatoms derived from sedimentary ancient DNA of the eastern Fram Strait over the past 30 000 years**

**Heike H. Zimmermann et al.**

*Correspondence to:* Heike H. Zimmermann ([heike.zimmermann@awi.de](mailto:heike.zimmermann@awi.de)) and Ulrike Herzschuh ([ulrike.herzschuh@awi.de](mailto:ulrike.herzschuh@awi.de))

- [os-16-1017-2020-supplement-title-page.pdf](#)
- [Supplementary\\_files](#)
  - [SupplementaryTableS1.xlsx](#)
  - [SupplementaryTableS2.xlsx](#)
  - [Supplementary\\_Figures.docx](#)

The copyright of individual parts of the supplement might differ from the CC BY 4.0 License.
